# Supplementary material
Source: Royal Society of Chemistry journal article supplement (doi:10.1039/d6ob00158k)
Supplement: d6ob00158k1.pdf [file d6ob00158k1.pdf]

## Supporting Information

# Chemo-, Regio- and Stereoselective Synthesis of (*E*)- $\gamma,\gamma$ - Diarylvinylphosphonates from $\alpha$ -Hydroxyallylphosphonates in TFA

*Babak Kaboudin, \*<sup>a</sup> Abolfazl Yadghybi,<sup>a</sup> Hikaru Yanai, \*<sup>b</sup> Haruhiko Fukaya,<sup>b</sup> Tianjian Zhang,<sup>c</sup> Yanlong Gu<sup>c</sup>*

<sup>a</sup>Department of Chemistry, Institute for Advanced Studies in Basic Sciences, Gava Zang, Zanjan 45137-66731, Iran

<sup>b</sup>School of Pharmacy, Tokyo University of Pharmacy and Life Sciences, 1432-1 Horinouchi, Hachioji, Tokyo 192-0392, Japan

<sup>c</sup>School of Chemistry and Chemical Engineering, Huazhong University of Science & Technology, Wuhan 430074, China

\*Corresponding author, Tel: +98 24 33153220; Fax: +98 24 33153232. E-mail address: [kaboudin@gmail.com](mailto:kaboudin@gmail.com) and [kaboudin@iasbs.ac.ir](mailto:kaboudin@iasbs.ac.ir)

### Table of Contents

|                                                    |                |
|----------------------------------------------------|----------------|
| <b>Figure S1: <sup>1</sup>H NMR Spectra of 1a</b>  | <b>S9-S149</b> |
| <b>Figure S2: <sup>13</sup>C NMR Spectra of 1a</b> |                |
| <b>Figure S3: <sup>31</sup>P NMR Spectra of 1a</b> |                |
| <b>Figure S4: <sup>1</sup>H NMR Spectra of 1b</b>  |                |
| <b>Figure S5: <sup>13</sup>C NMR Spectra of 1b</b> |                |
| <b>Figure S6: <sup>31</sup>P NMR Spectra of 1b</b> |                |

**Figure S7:  $^1\text{H}$  NMR Spectra of 1c**  
**Figure S8:  $^{13}\text{C}$  NMR Spectra of 1c**  
**Figure S9:  $^{31}\text{P}$  NMR Spectra of 1c**  
**Figure S10:  $^1\text{H}$  NMR Spectra of 1d**  
**Figure S11:  $^{13}\text{C}$  NMR Spectra of 1d**  
**Figure S12:  $^{31}\text{P}$  NMR Spectra of 1d**  
**Figure S13:  $^1\text{H}$  NMR Spectra of 1e**  
**Figure S14:  $^{13}\text{C}$  NMR Spectra of 1e**  
**Figure S15:  $^{31}\text{P}$  NMR Spectra of 1e**  
**Figure S16:  $^1\text{H}$  NMR Spectra of 1f**  
**Figure S17:  $^{13}\text{C}$  NMR Spectra of 1f**  
**Figure S18:  $^{31}\text{P}$  NMR Spectra of 1f**  
**Figure S19:  $^1\text{H}$  NMR Spectra of 1g**  
**Figure S20:  $^{13}\text{C}$  NMR Spectra of 1g**  
**Figure S21:  $^{31}\text{P}$  NMR Spectra of 1g**  
**Figure S22:  $^1\text{H}$  NMR Spectra of 1h**  
**Figure S23:  $^{13}\text{C}$  NMR Spectra of 1h**  
**Figure S24:  $^{31}\text{P}$  NMR Spectra of 1h**  
**Figure S25:  $^1\text{H}$  NMR Spectra of 1i**  
**Figure S26:  $^{13}\text{C}$  NMR Spectra of 1i**  
**Figure S27:  $^{31}\text{P}$  NMR Spectra of 1i**

**Figure S28:  $^1\text{H}$  NMR Spectra of 3a**

**Figure S29:  $^{13}\text{C}$  NMR Spectra of 3a**

**Figure S30:  $^{31}\text{P}$  NMR Spectra of 3a**

**Figure S31:  $^1\text{H}$  NMR Spectra of 3b**

**Figure S32:  $^{13}\text{C}$  NMR Spectra of 3b**

**Figure S33:  $^{31}\text{P}$  NMR Spectra of 3b**

**Figure S34:  $^1\text{H}$  NMR Spectra of 3c**

**Figure S35:  $^{13}\text{C}$  NMR Spectra of 3c**

**Figure S36:  $^{31}\text{P}$  NMR Spectra of 3c**

**Figure S37:  $^1\text{H}$  NMR Spectra of 3d**

**Figure S38:  $^{13}\text{C}$  NMR Spectra of 3d**

**Figure S39:  $^{31}\text{P}$  NMR Spectra of 3d**

**Figure S40:  $^1\text{H}$  NMR Spectra of 3e**

**Figure S41:  $^{13}\text{C}$  NMR Spectra of 3e**

**Figure S42:  $^{31}\text{P}$  NMR Spectra of 3e**

**Figure S43:  $^1\text{H}$  NMR Spectra of 3f**

**Figure S44:  $^{13}\text{C}$  NMR Spectra of 3f**

**Figure S45:  $^{31}\text{P}$  NMR Spectra of 3f**

**Figure S46:  $^1\text{H}$  NMR Spectra of 3g**

**Figure S47:  $^{13}\text{C}$  NMR Spectra of 3g**

**Figure S48:  $^{31}\text{P}$  NMR Spectra of 3g**

**Figure S49:  $^1\text{H}$  NMR Spectra of 3h**  
**Figure S50:  $^{13}\text{C}$  NMR Spectra of 3h**  
**Figure S51:  $^{31}\text{P}$  NMR Spectra of 3h**  
**Figure S52:  $^1\text{H}$  NMR Spectra of 3i**  
**Figure S53:  $^{13}\text{C}$  NMR Spectra of 3i**  
**Figure S54:  $^{31}\text{P}$  NMR Spectra of 3i**  
**Figure S55:  $^1\text{H}$  NMR Spectra of 3j**  
**Figure S56:  $^{13}\text{C}$  NMR Spectra of 3j**  
**Figure S57:  $^{31}\text{P}$  NMR Spectra of 3j**  
**Figure S58:  $^1\text{H}$  NMR Spectra of 3k**  
**Figure S59:  $^{13}\text{C}$  NMR Spectra of 3k**  
**Figure S60:  $^{31}\text{P}$  NMR Spectra of 3k**  
**Figure S61:  $^1\text{H}$  NMR Spectra of 3l**  
**Figure S62:  $^{13}\text{C}$  NMR Spectra of 3l**  
**Figure S63:  $^{31}\text{P}$  NMR Spectra of 3l**  
**Figure S64:  $^1\text{H}$  NMR Spectra of 3m**  
**Figure S65:  $^{13}\text{C}$  NMR Spectra of 3m**  
**Figure S66:  $^{31}\text{P}$  NMR Spectra of 3m**  
**Figure S67:  $^1\text{H}$  NMR Spectra of 3n**  
**Figure S68:  $^{13}\text{C}$  NMR Spectra of 3n**  
**Figure S69:  $^{31}\text{P}$  NMR Spectra of 3n**

**Figure S70:  $^1\text{H}$  NMR Spectra of 3o**

**Figure S71:  $^{13}\text{C}$  NMR Spectra of 3o**

**Figure S72:  $^{31}\text{P}$  NMR Spectra of 3o**

**Figure S73:  $^1\text{H}$  NMR Spectra of 3p**

**Figure S74:  $^{13}\text{C}$  NMR Spectra of 3p**

**Figure S75:  $^{31}\text{P}$  NMR Spectra of 3p**

**Figure S76:  $^1\text{H}$  NMR Spectra of 3q**

**Figure S77:  $^{13}\text{C}$  NMR Spectra of 3q**

**Figure S78:  $^{31}\text{P}$  NMR Spectra of 3q**

**Figure S79:  $^1\text{H}$  NMR Spectra of 3r**

**Figure S80:  $^{13}\text{C}$  NMR Spectra of 3r**

**Figure S81:  $^{31}\text{P}$  NMR Spectra of 3r**

**Figure S82:  $^1\text{H}$  NMR Spectra of 3s**

**Figure S83:  $^{13}\text{C}$  NMR Spectra of 3s**

**Figure S84:  $^{31}\text{P}$  NMR Spectra of 3s**

**Figure S85:  $^1\text{H}$  NMR Spectra of 3t**

**Figure S86:  $^{13}\text{C}$  NMR Spectra of 3t**

**Figure S87:  $^{31}\text{P}$  NMR Spectra of 3t**

**Figure S88:  $^1\text{H}$  NMR Spectra of 3u**

**Figure S89:  $^{13}\text{C}$  NMR Spectra of 3u**

**Figure S90:  $^{31}\text{P}$  NMR Spectra of 3u**

**Figure S91:  $^1\text{H}$  NMR Spectra of 3v**  
**Figure S92:  $^{13}\text{C}$  NMR Spectra of 3v**  
**Figure S93:  $^{31}\text{P}$  NMR Spectra of 3v**  
**Figure S94:  $^1\text{H}$  NMR Spectra of 3w**  
**Figure S95:  $^{13}\text{C}$  NMR Spectra of 3w**  
**Figure S96:  $^{31}\text{P}$  NMR Spectra of 3w**  
**Figure S97:  $^1\text{H}$  NMR Spectra of 3x**  
**Figure S98:  $^{13}\text{C}$  NMR Spectra of 3x**  
**Figure S99:  $^{31}\text{P}$  NMR Spectra of 3x**  
**Figure S100:  $^1\text{H}$  NMR Spectra of 3y**  
**Figure S101:  $^{13}\text{C}$  NMR Spectra of 3y**  
**Figure S102:  $^{31}\text{P}$  NMR Spectra of 3y**  
**Figure S103:  $^1\text{H}$  NMR Spectra of 3z**  
**Figure S104:  $^{13}\text{C}$  NMR Spectra of 3z**  
**Figure S105:  $^{31}\text{P}$  NMR Spectra of 3z**  
**Figure S106:  $^1\text{H}$  NMR Spectra of 5a**  
**Figure S107:  $^{13}\text{C}$  NMR Spectra of 5a**  
**Figure S108:  $^{31}\text{P}$  NMR Spectra of 5a**  
**Figure S109:  $^1\text{H}$  NMR Spectra of 5b**  
**Figure S110:  $^{13}\text{C}$  NMR Spectra of 5b**  
**Figure S111:  $^{31}\text{P}$  NMR Spectra of 5b**

**Figure S112:  $^1\text{H}$  NMR Spectra of 5c**

**Figure S113:  $^{13}\text{C}$  NMR Spectra of 5c**

**Figure S114:  $^{31}\text{P}$  NMR Spectra of 5c**

**Figure S115:  $^1\text{H}$  NMR Spectra of 5d**

**Figure S116:  $^{13}\text{C}$  NMR Spectra of 5d**

**Figure S117:  $^{31}\text{P}$  NMR Spectra of 5d**

**Figure S118:  $^1\text{H}$  NMR Spectra of 5e**

**Figure S119:  $^{13}\text{C}$  NMR Spectra of 5e**

**Figure S120:  $^{31}\text{P}$  NMR Spectra of 5e**

**Figure S121:  $^1\text{H}$  NMR Spectra of 5f**

**Figure S122:  $^{13}\text{C}$  NMR Spectra of 5f**

**Figure S123:  $^{31}\text{P}$  NMR Spectra of 5f**

**Figure S124:  $^1\text{H}$  NMR Spectra of 5g**

**Figure S125:  $^{13}\text{C}$  NMR Spectra of 5g**

**Figure S126:  $^{31}\text{P}$  NMR Spectra of 5g**

**Figure S127:  $^1\text{H}$  NMR Spectra of 5h**

**Figure S128:  $^{13}\text{C}$  NMR Spectra of 5h**

**Figure S129:  $^{31}\text{P}$  NMR Spectra of 5h**

**Figure S130:  $^1\text{H}$  NMR Spectra of 7a**

**Figure S131:  $^{13}\text{C}$  NMR Spectra of 7a**

**Figure S132:  $^{31}\text{P}$  NMR Spectra of 7a**

**Figure S133:  $^1\text{H}$  NMR Spectra of 7b**

**Figure S134:  $^{13}\text{C}$  NMR Spectra of 7b**

**Figure S135:  $^{31}\text{P}$  NMR Spectra of 7b**

**Figure S136:  $^1\text{H}$  NMR Spectra of 7c**

**Figure S137:  $^{13}\text{C}$  NMR Spectra of 7c**

**Figure S138:  $^{31}\text{P}$  NMR Spectra of 7c**

**Figure S139:  $^1\text{H}$  NMR Spectra of 7d**

**Figure S140:  $^{13}\text{C}$  NMR Spectra of 7d**

**Figure S141:  $^{31}\text{P}$  NMR Spectra of 7d**

**Figure S142:  $^1\text{H}$  NMR Spectra of 1aa**

**Figure S143:  $^{13}\text{C}$  NMR Spectra of 1aa**

**Figure S144:  $^{31}\text{P}$  NMR Spectra of 1aa**

**Figure S145:  $^1\text{H}$  NMR Spectra of products of the reaction of Phenol with 1a in TFA in  $\text{CDCl}_3$**

**Figure S146:  $^{13}\text{C}\{^1\text{H}\}$  NMR Spectra of products of the reaction of Phenol with 1a in TFA in  $\text{CDCl}_3$**

**Figure S147:  $^{31}\text{P}\{^1\text{H}\}$  NMR Spectra of products of the reaction of Phenol with 1a in TFA in  $\text{CDCl}_3$**

**DFT analysis data**

**S149-S185**

**Figure S148: Considered transition states, molecular geometries and energies**

**S186**

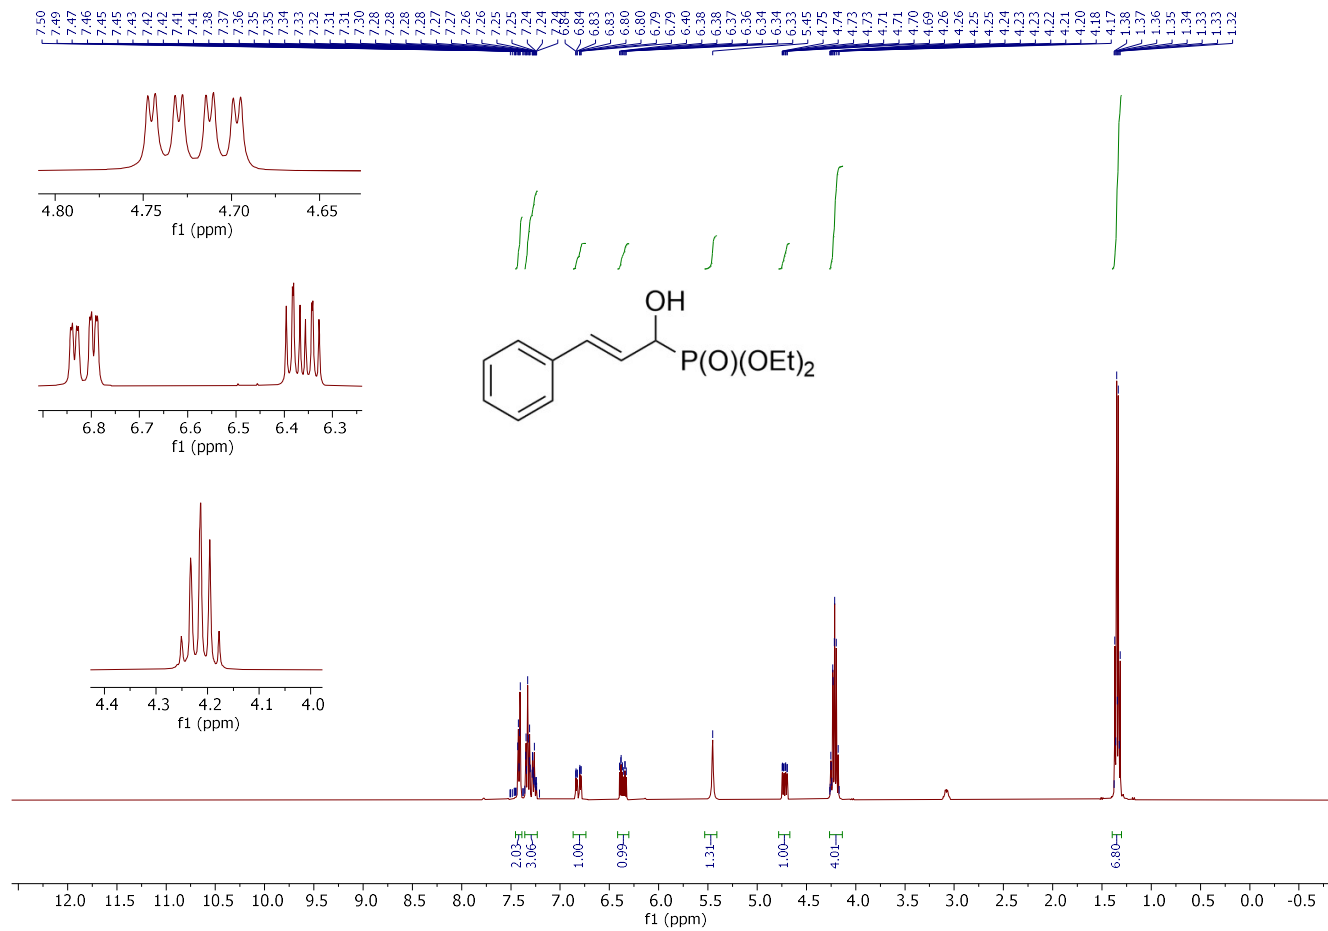

Figure S1:  $^1\text{H}$  NMR Spectra of 1a in  $\text{CDCl}_3$

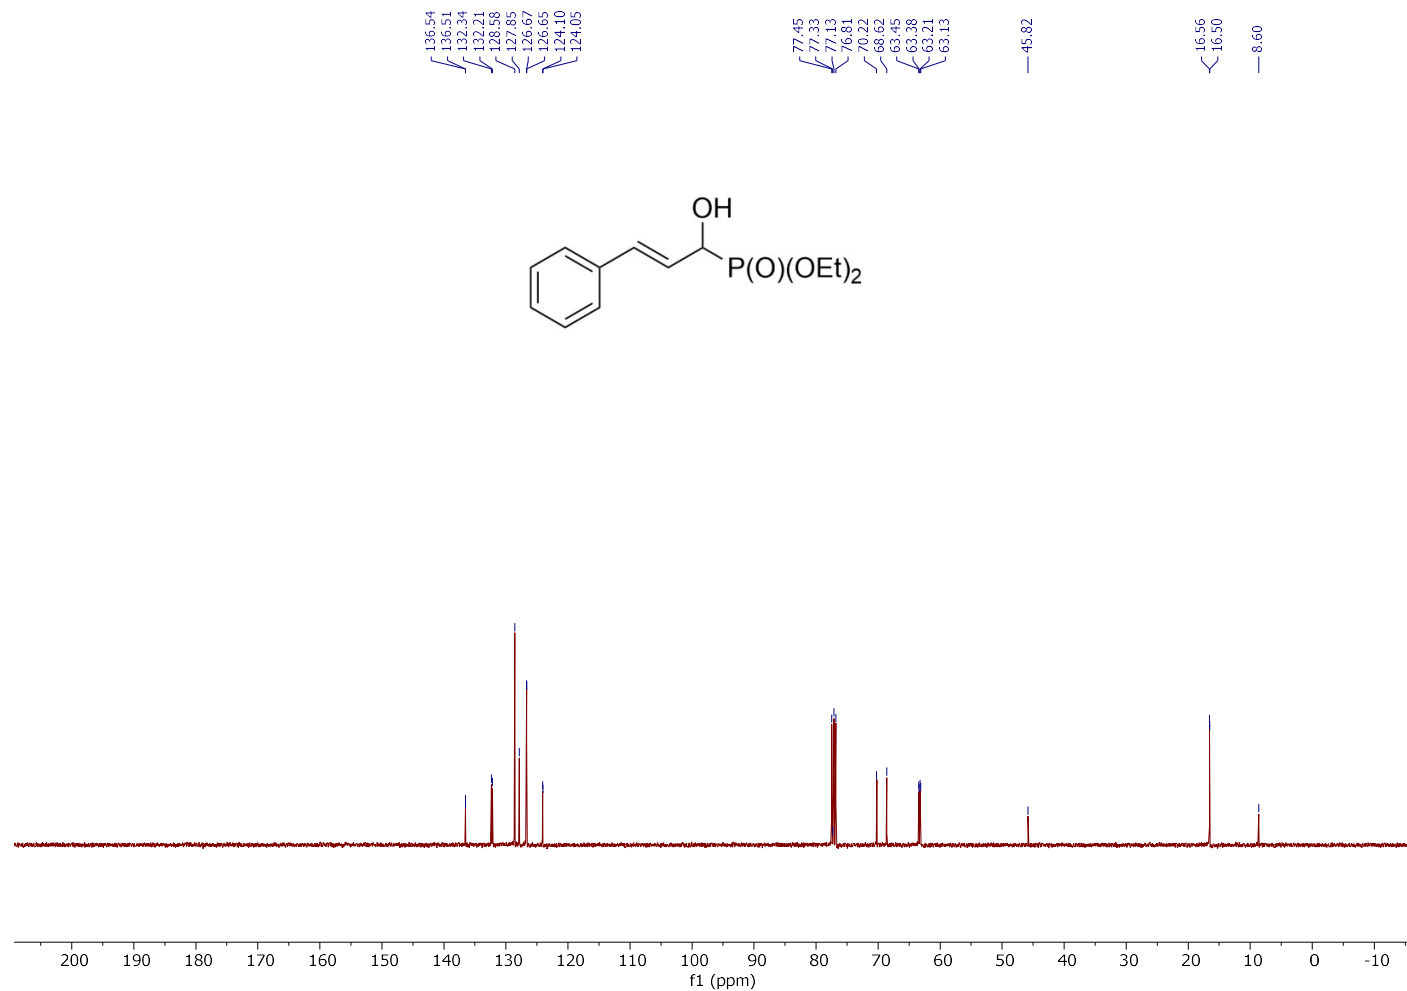

Figure S2:  $^{13}\text{C}\{^1\text{H}\}$  NMR Spectra of 1a in  $\text{CDCl}_3$

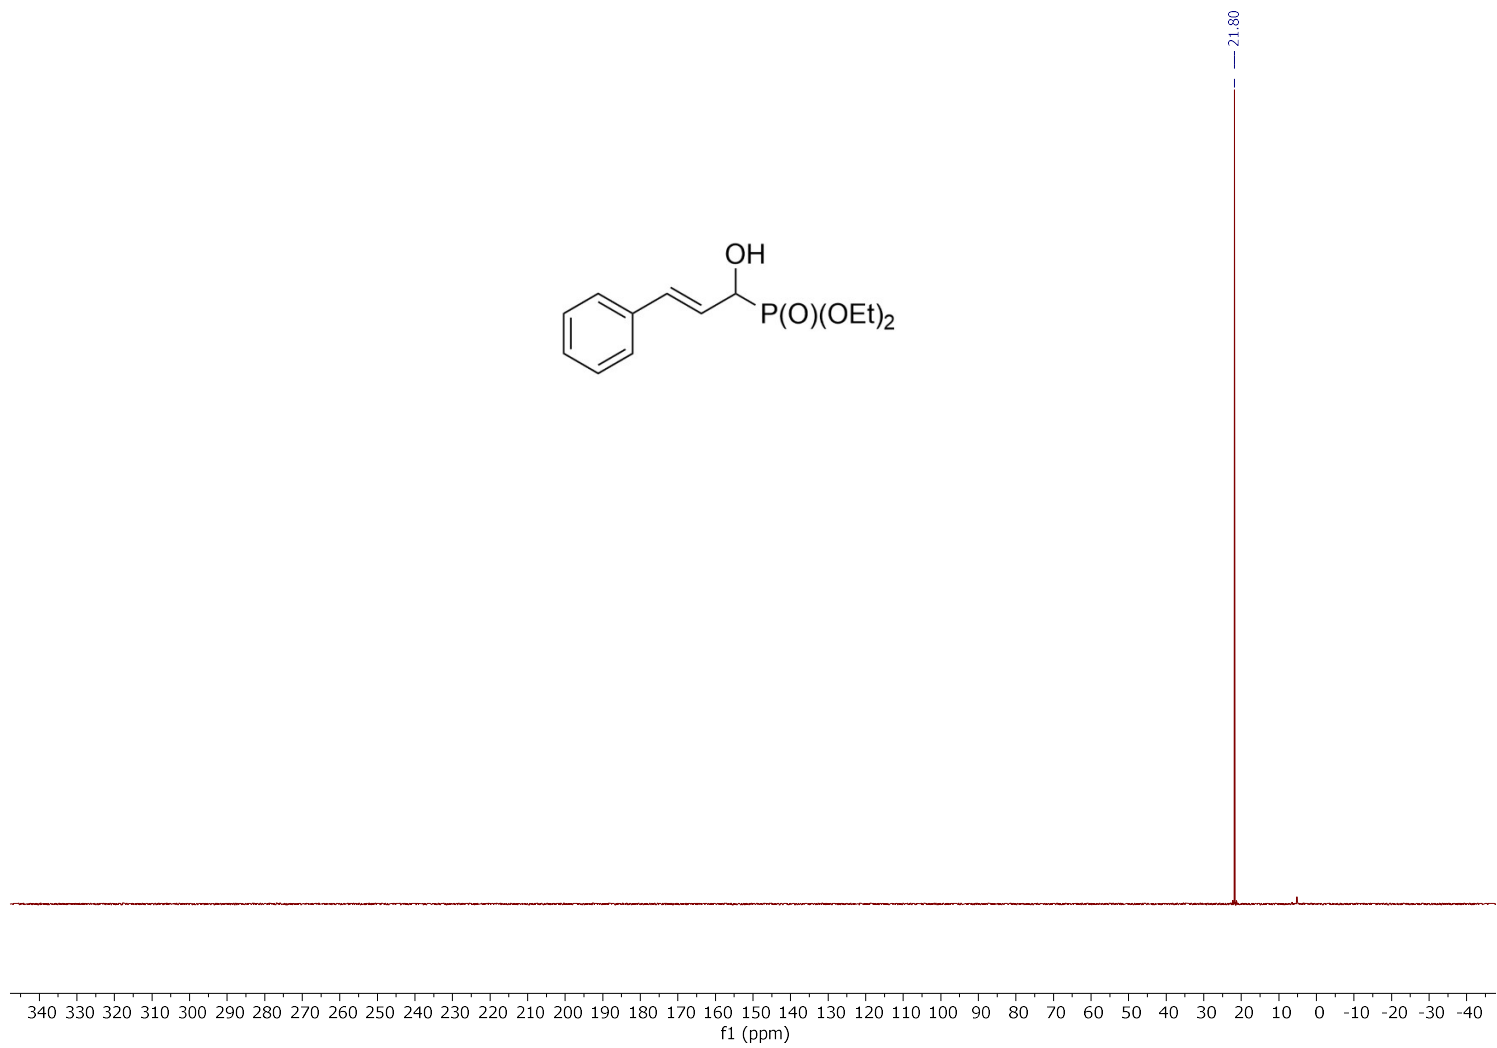

**Figure S3:**  $^{31}\text{P}\{^1\text{H}\}$  NMR Spectra of 1a in  $\text{CDCl}_3$

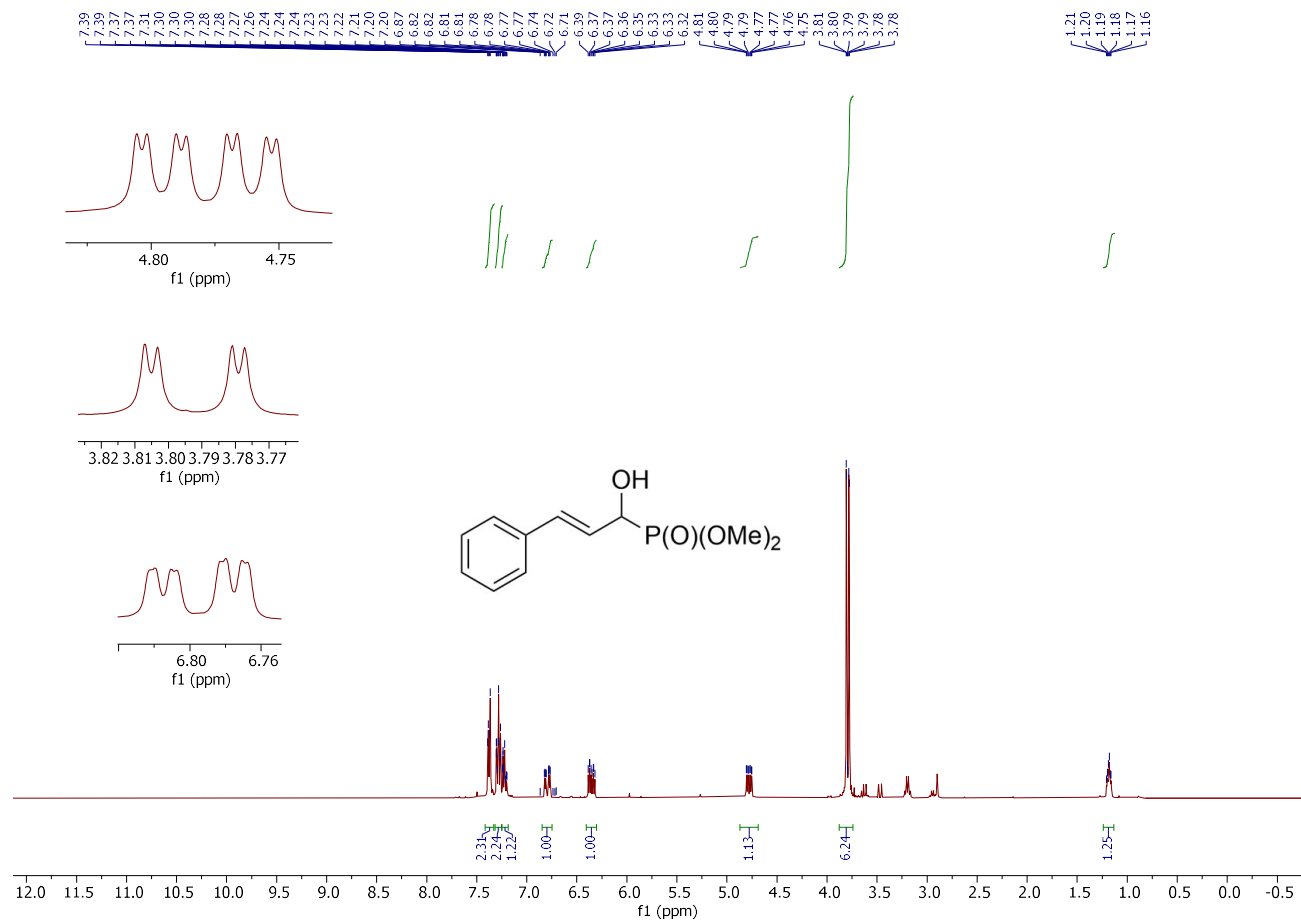

Figure S4:  $^1\text{H}$  NMR Spectra of 1b in  $\text{CDCl}_3$

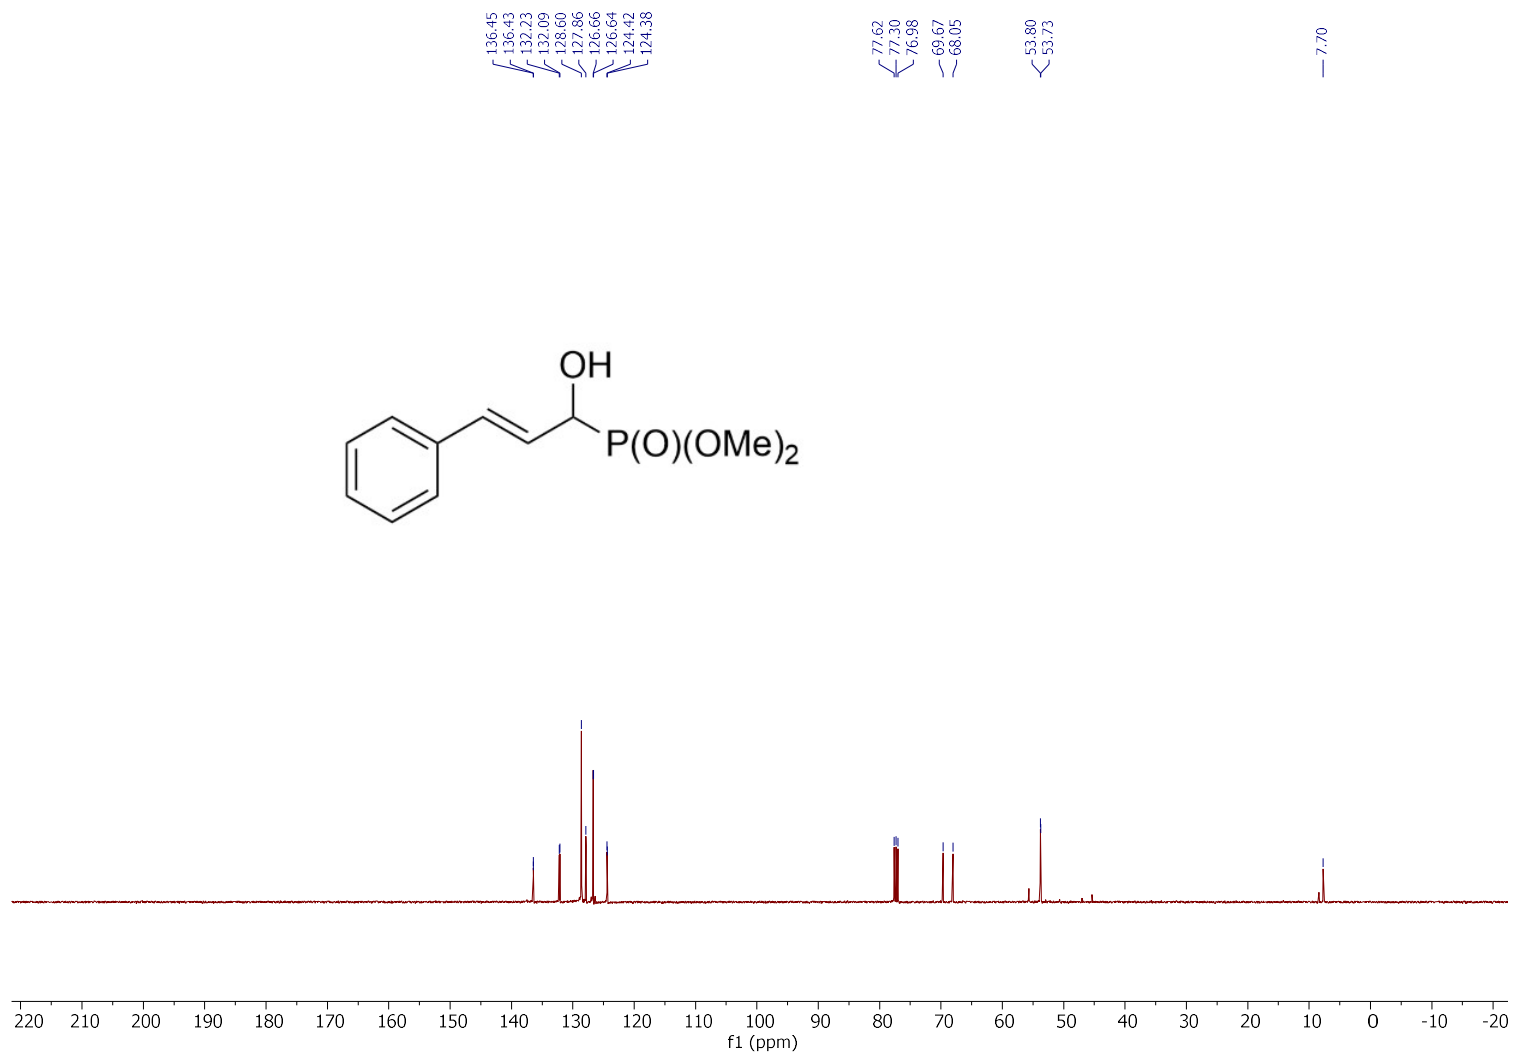

Figure S5:  $^{13}\text{C}\{^1\text{H}\}$  NMR Spectra of 1b in  $\text{CDCl}_3$

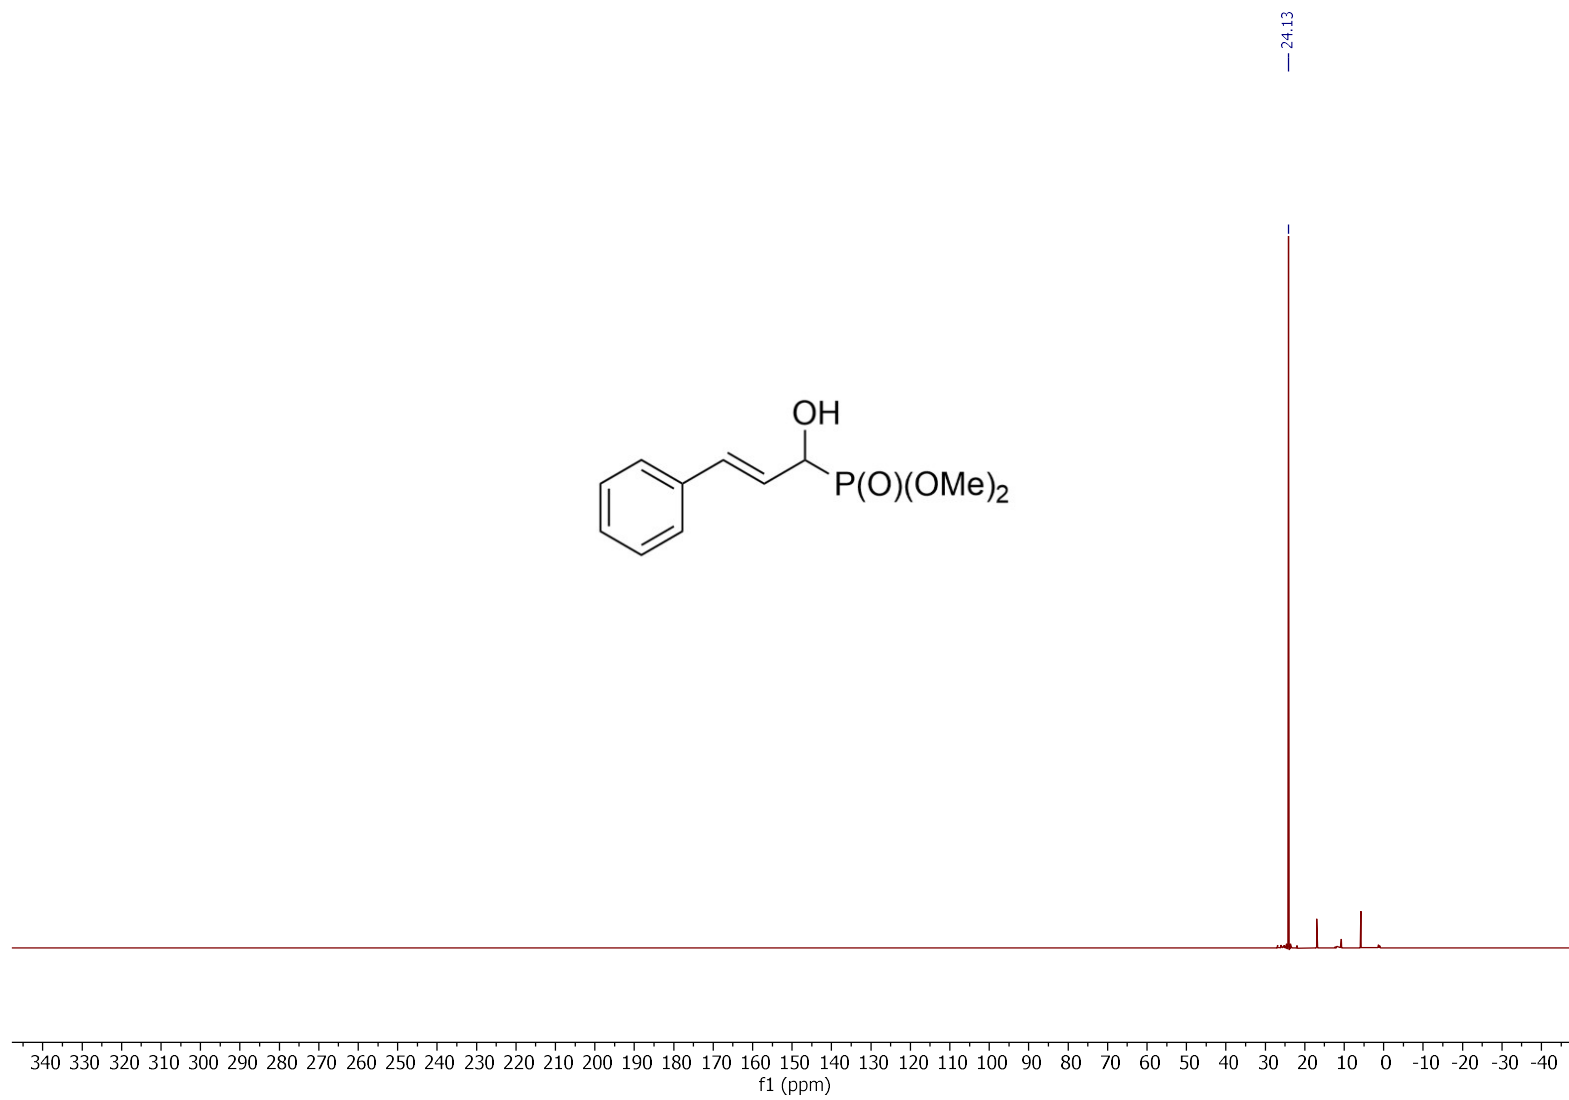

Figure S6:  $^{31}\text{P}\{^1\text{H}\}$  NMR Spectra of 1b in  $\text{CDCl}_3$

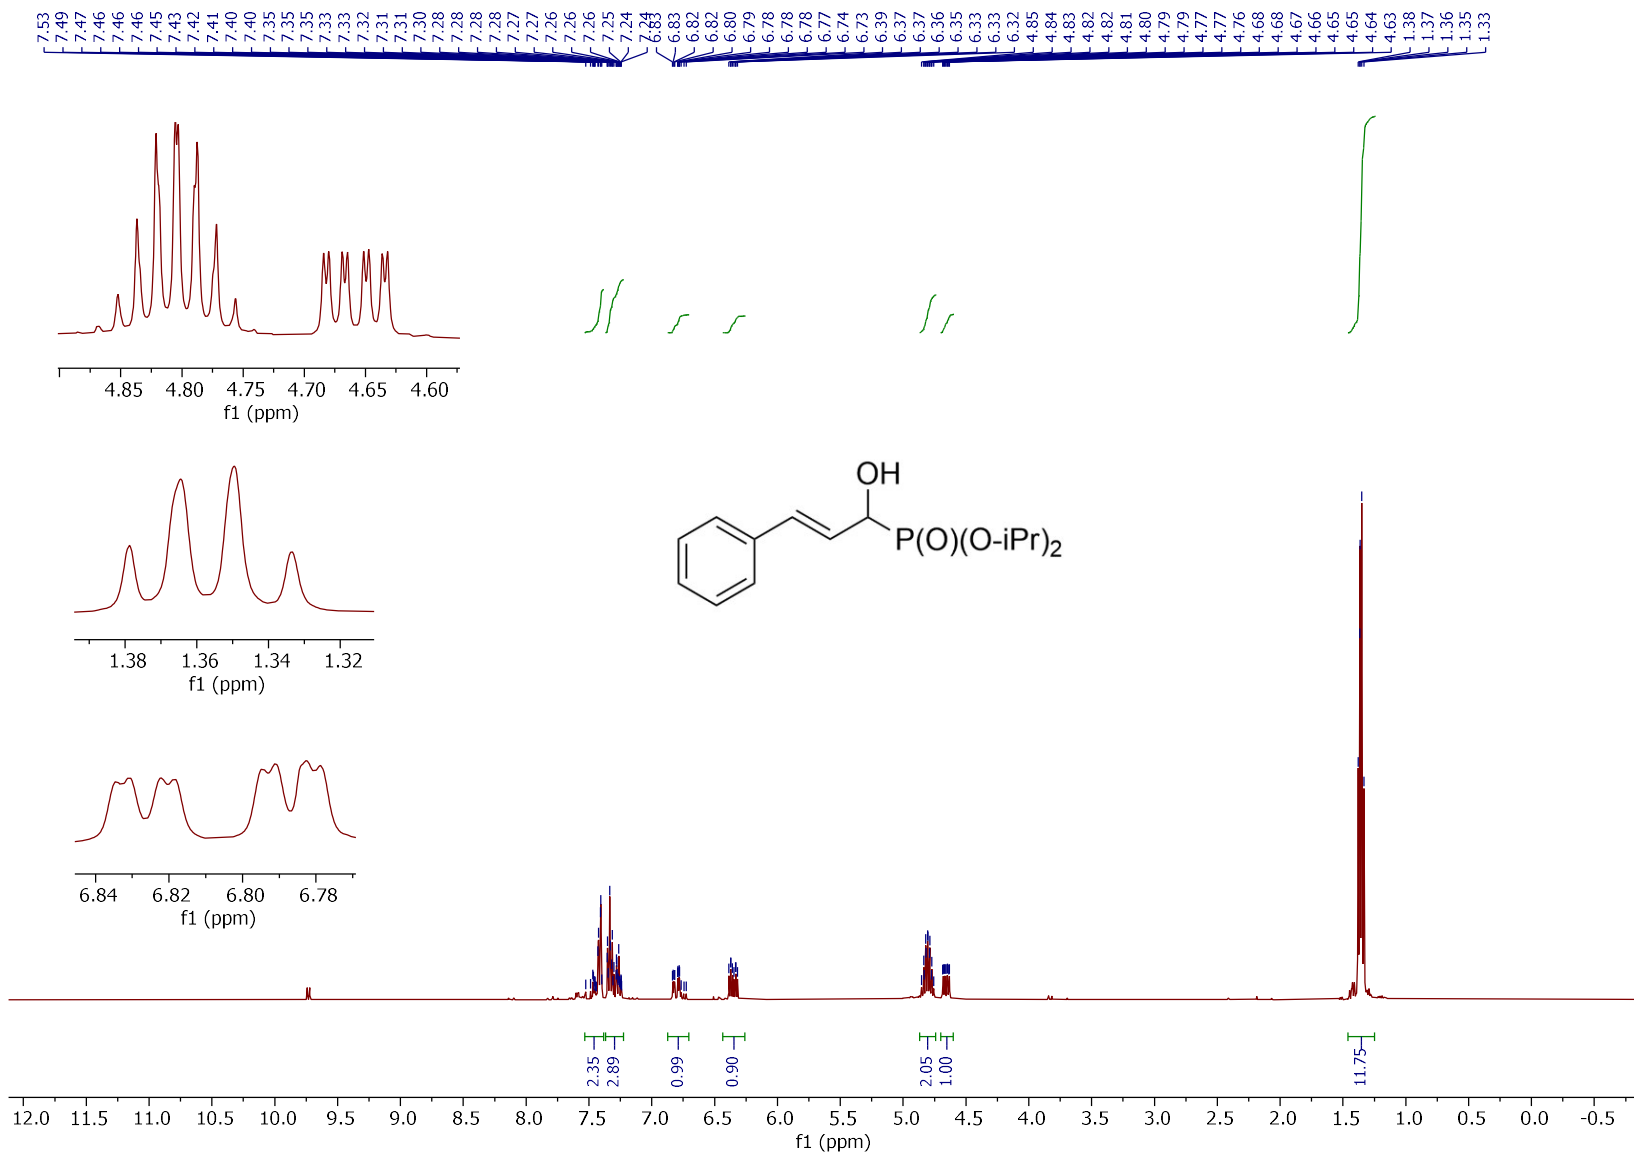

Figure S7: <sup>1</sup>H NMR Spectra of 1c in CDCl<sub>3</sub>

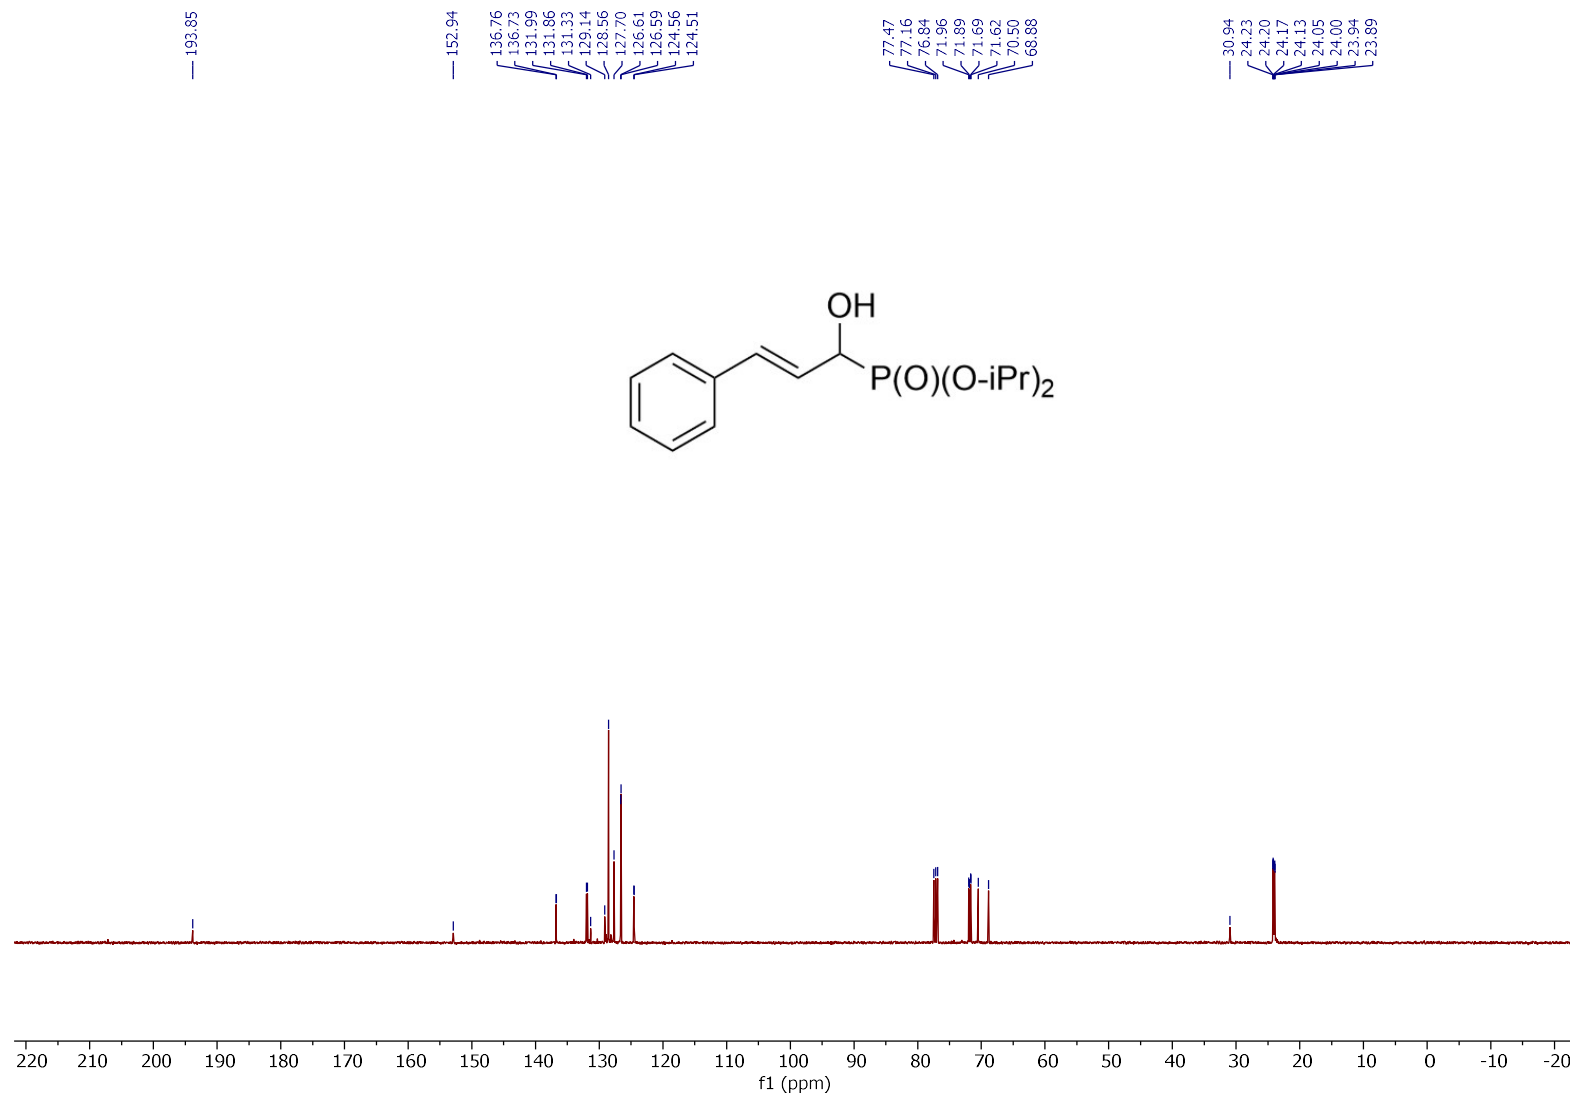

Figure S8:  $^{13}\text{C}\{^1\text{H}\}$  NMR Spectra of 1c in  $\text{CDCl}_3$

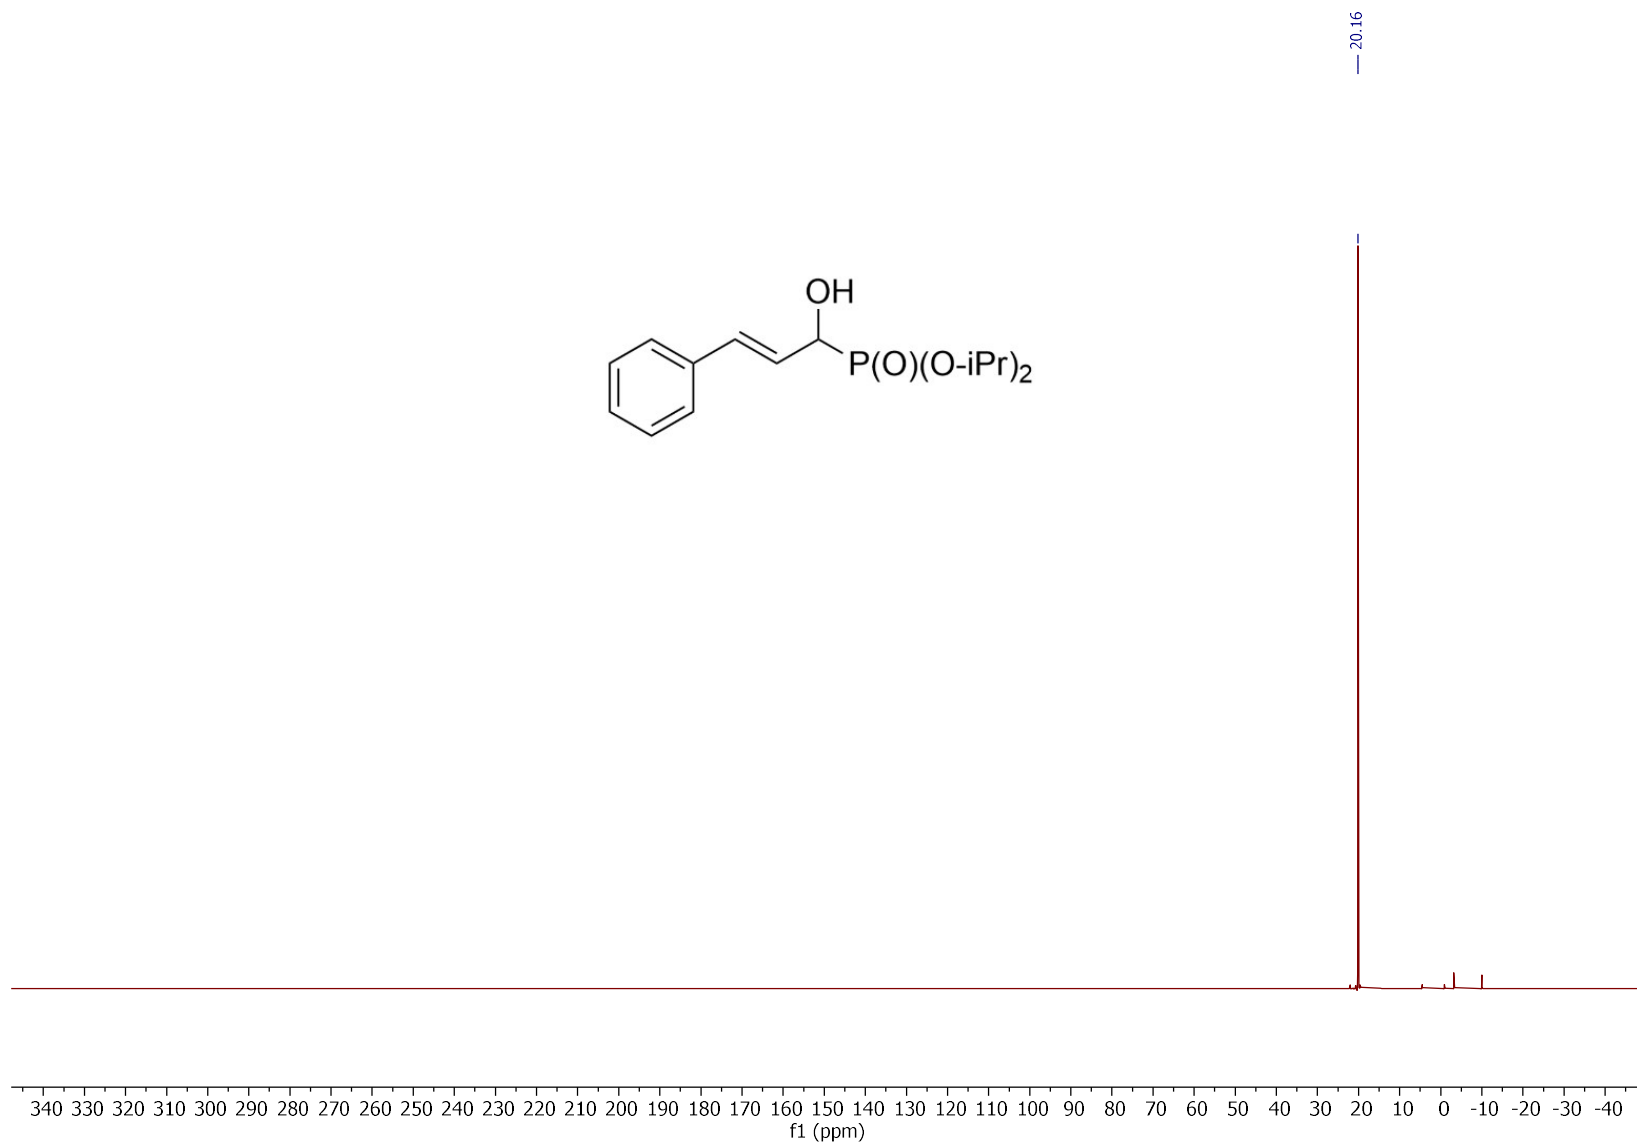

Figure S9:  $^{31}\text{P}\{^1\text{H}\}$  NMR Spectra of 1c in  $\text{CDCl}_3$

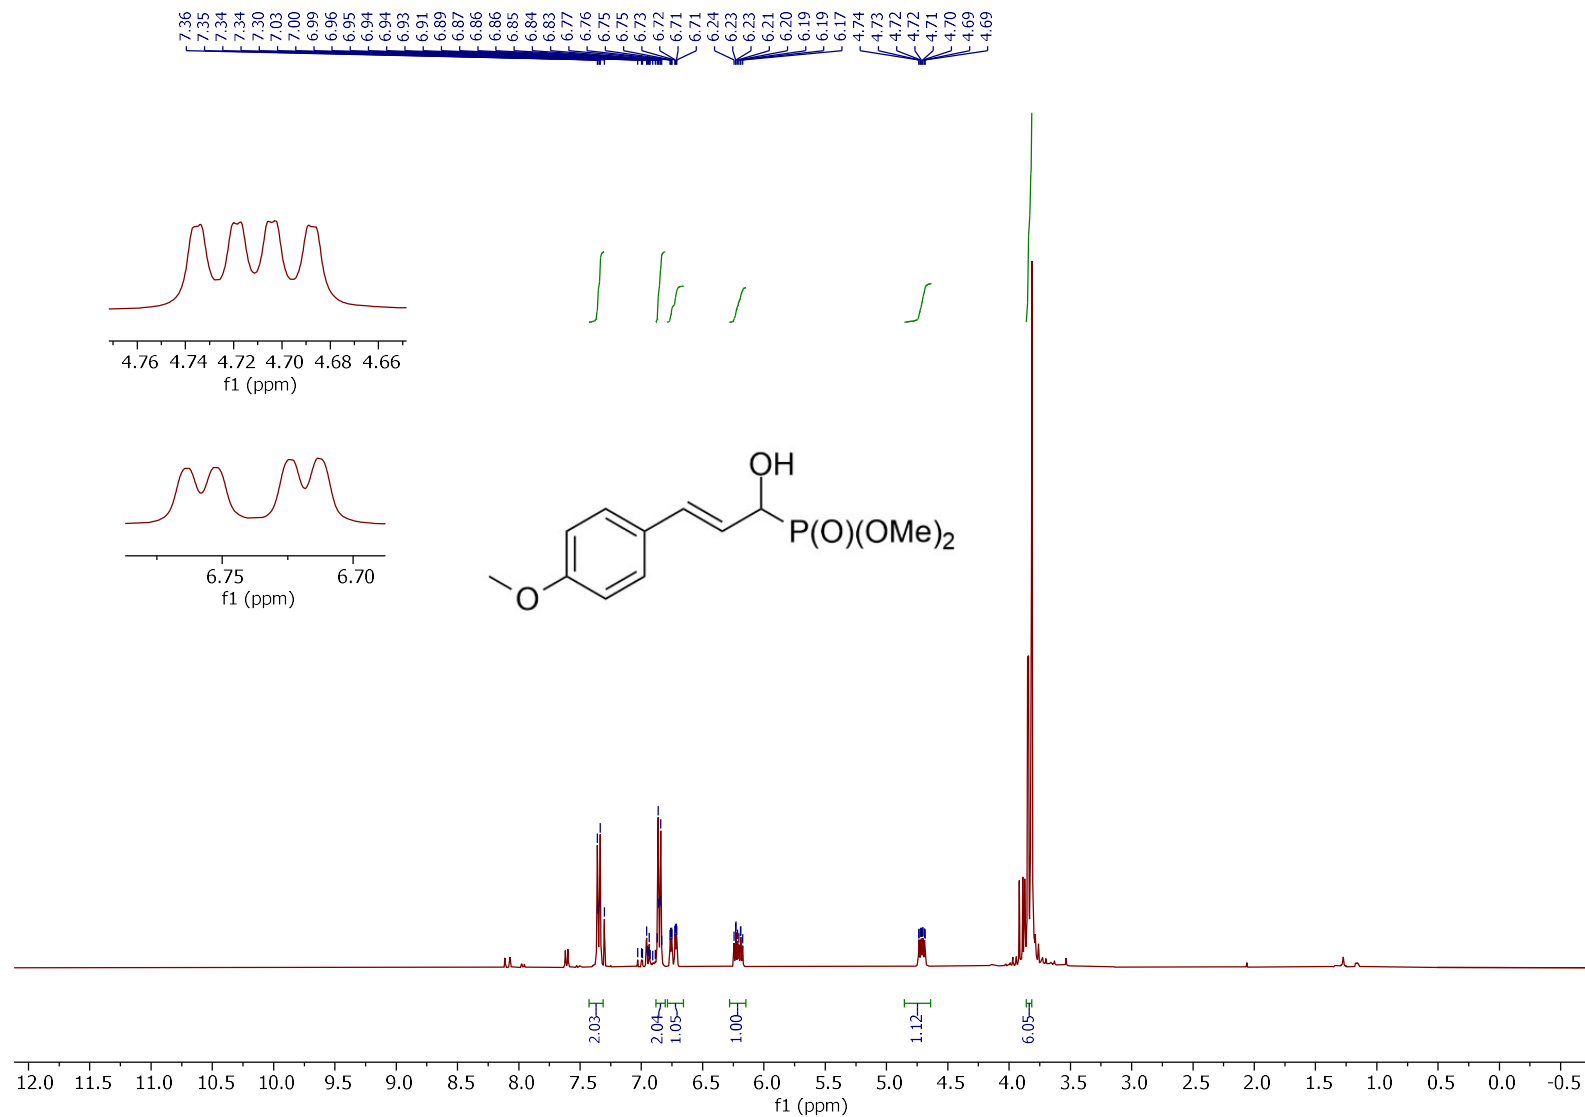

Figure S10:  $^1\text{H}$  NMR Spectra of 1d in  $\text{CDCl}_3$

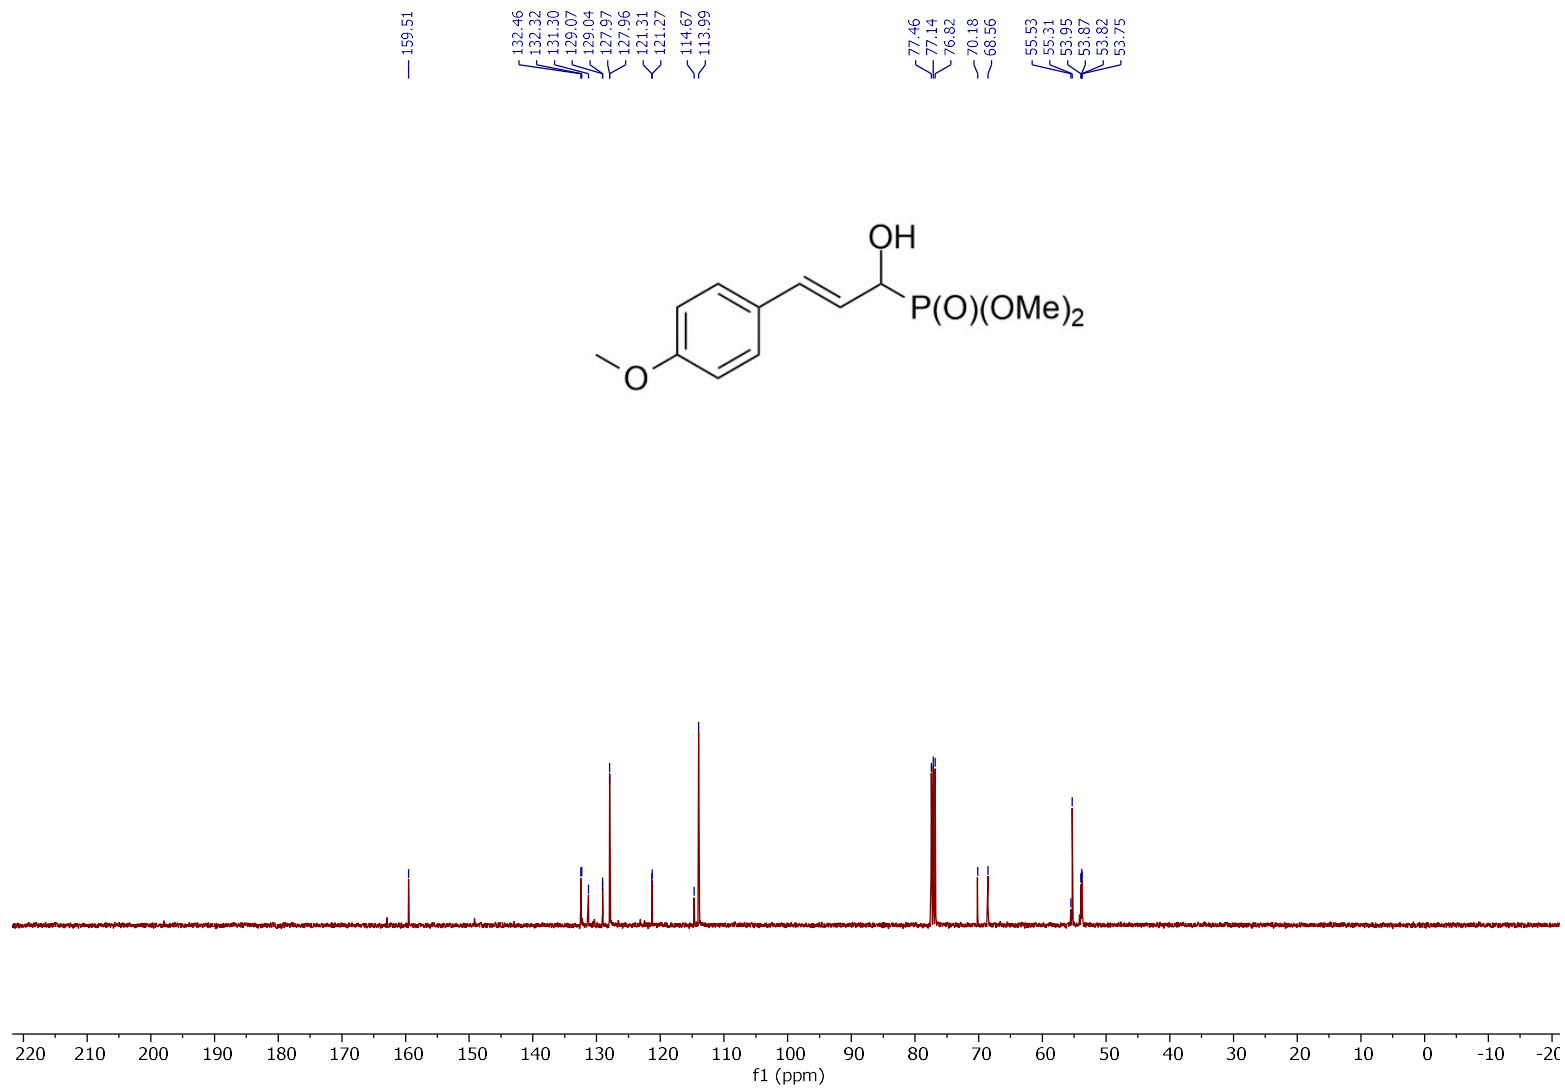

Figure S11:  $^{13}\text{C}\{^1\text{H}\}$  NMR Spectra of 1d in  $\text{CDCl}_3$

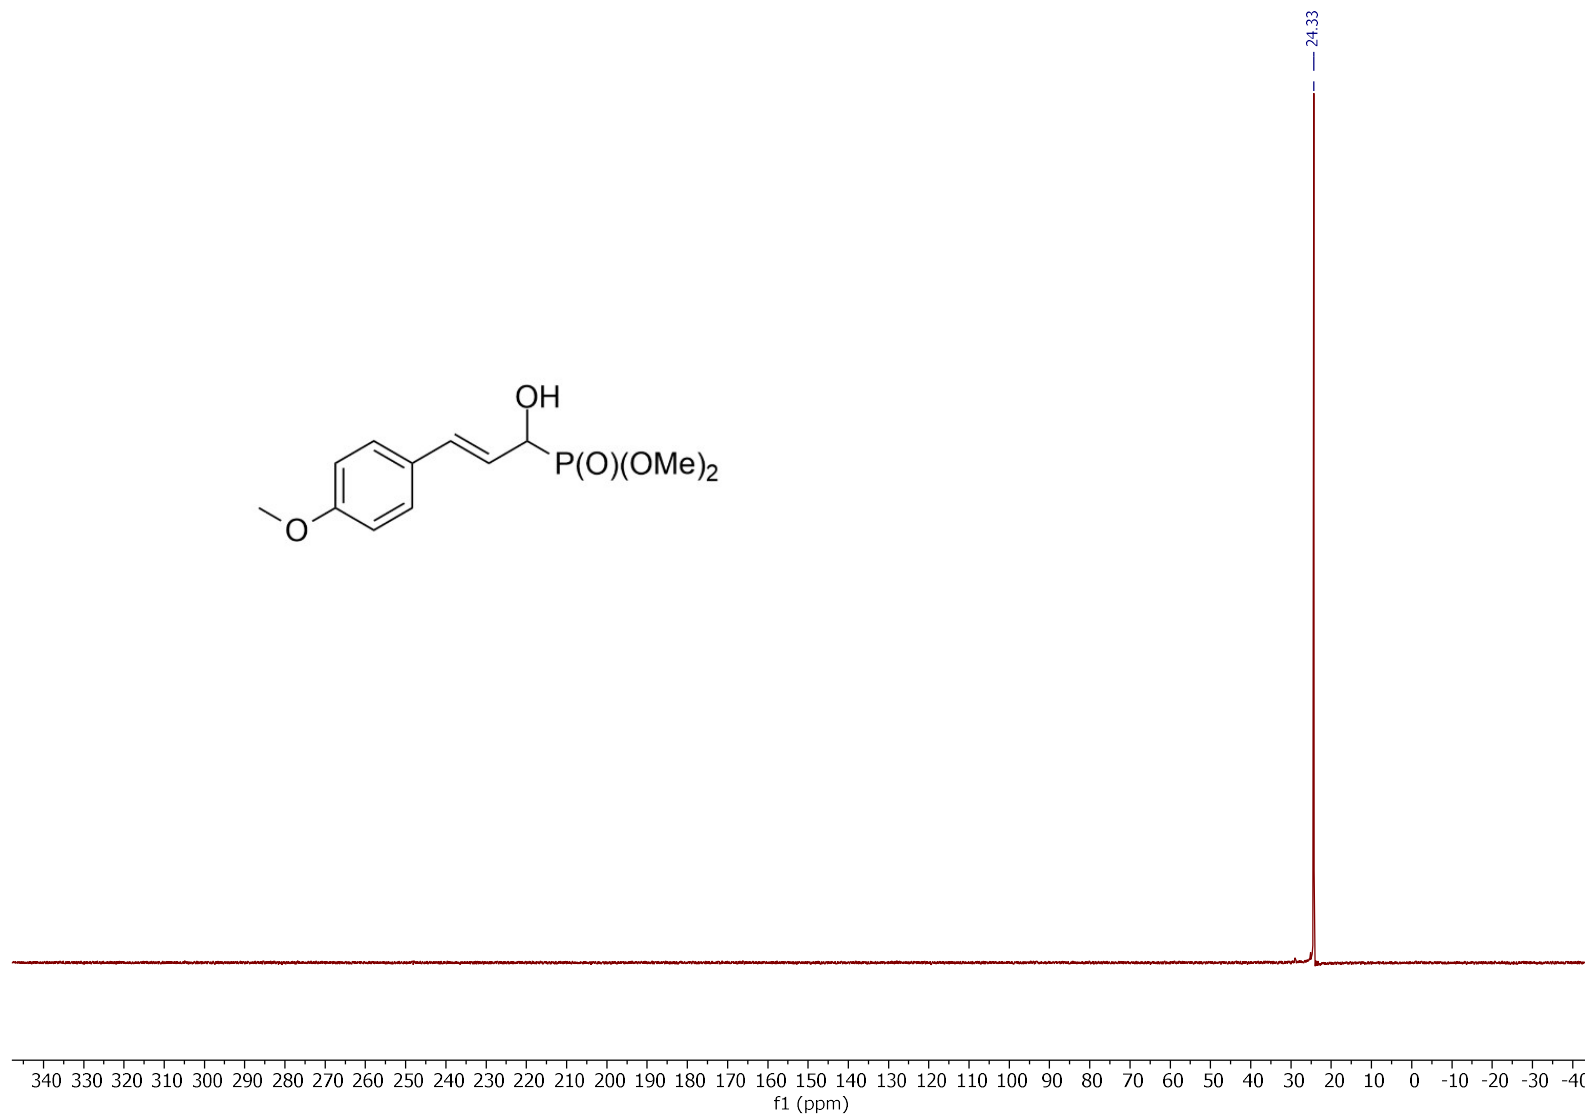

**Figure S12:**  $^{31}\text{P}\{^1\text{H}\}$  NMR Spectra of **1d** in  $\text{CDCl}_3$

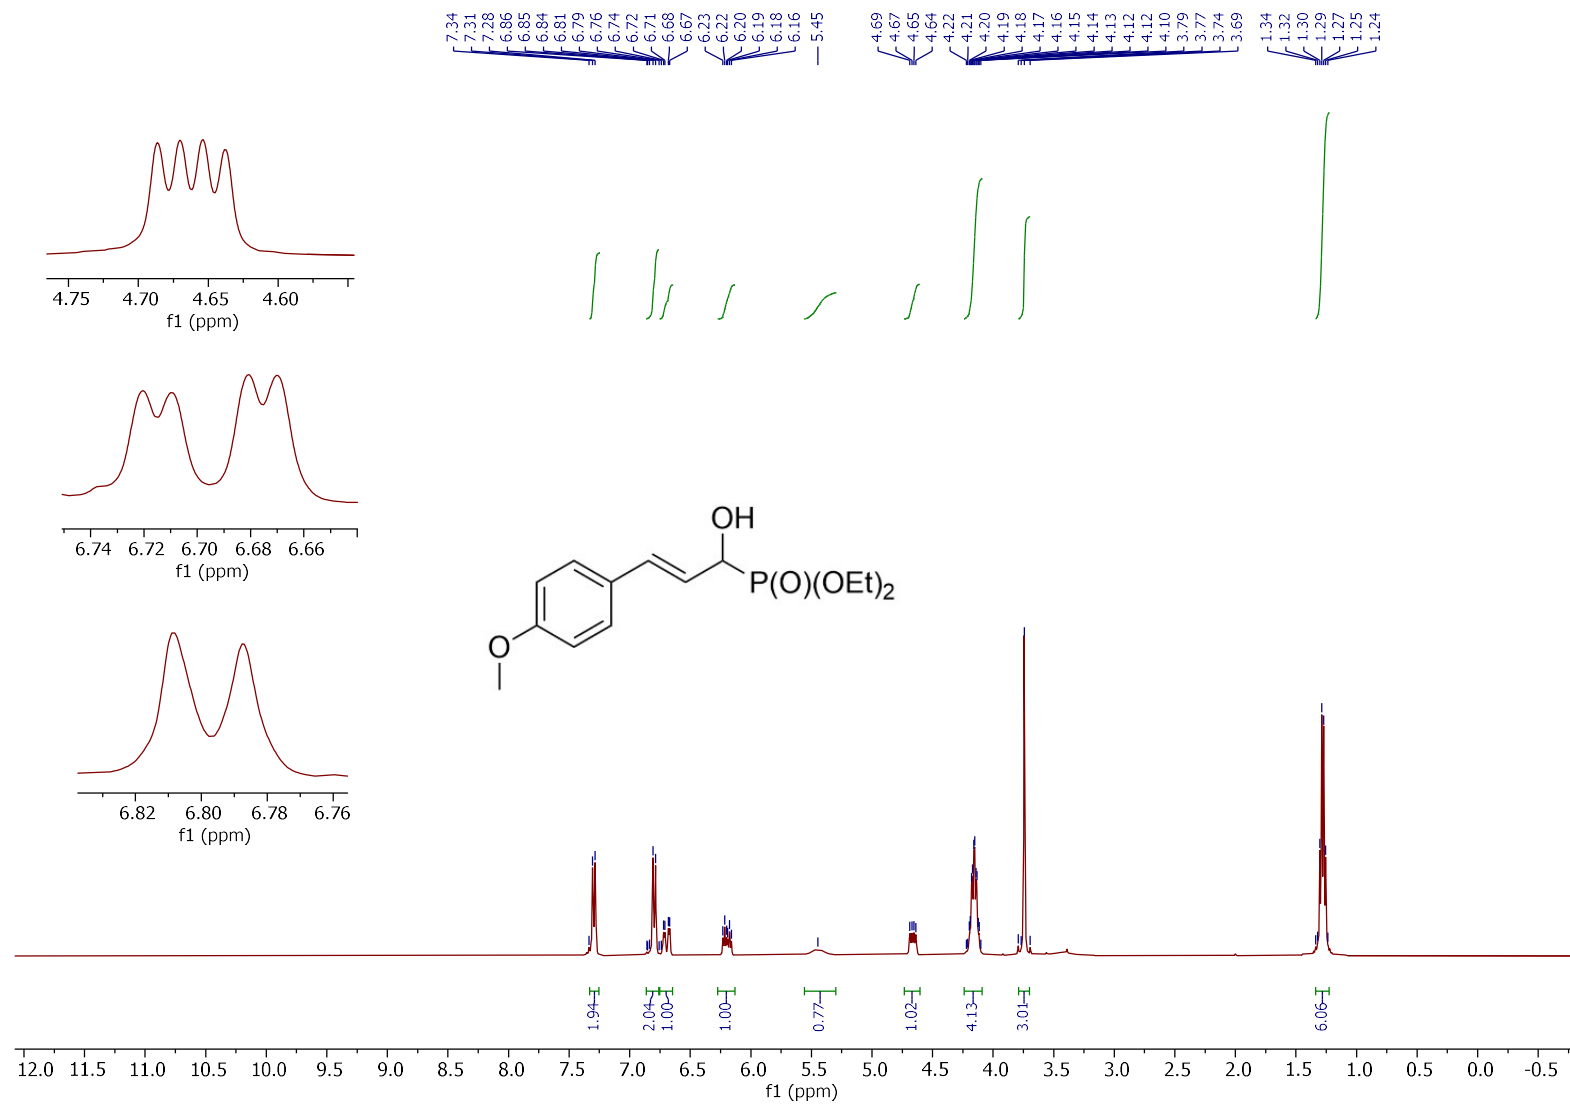

Figure S13:  $^1\text{H}$  NMR Spectra of 1e in  $\text{CDCl}_3$

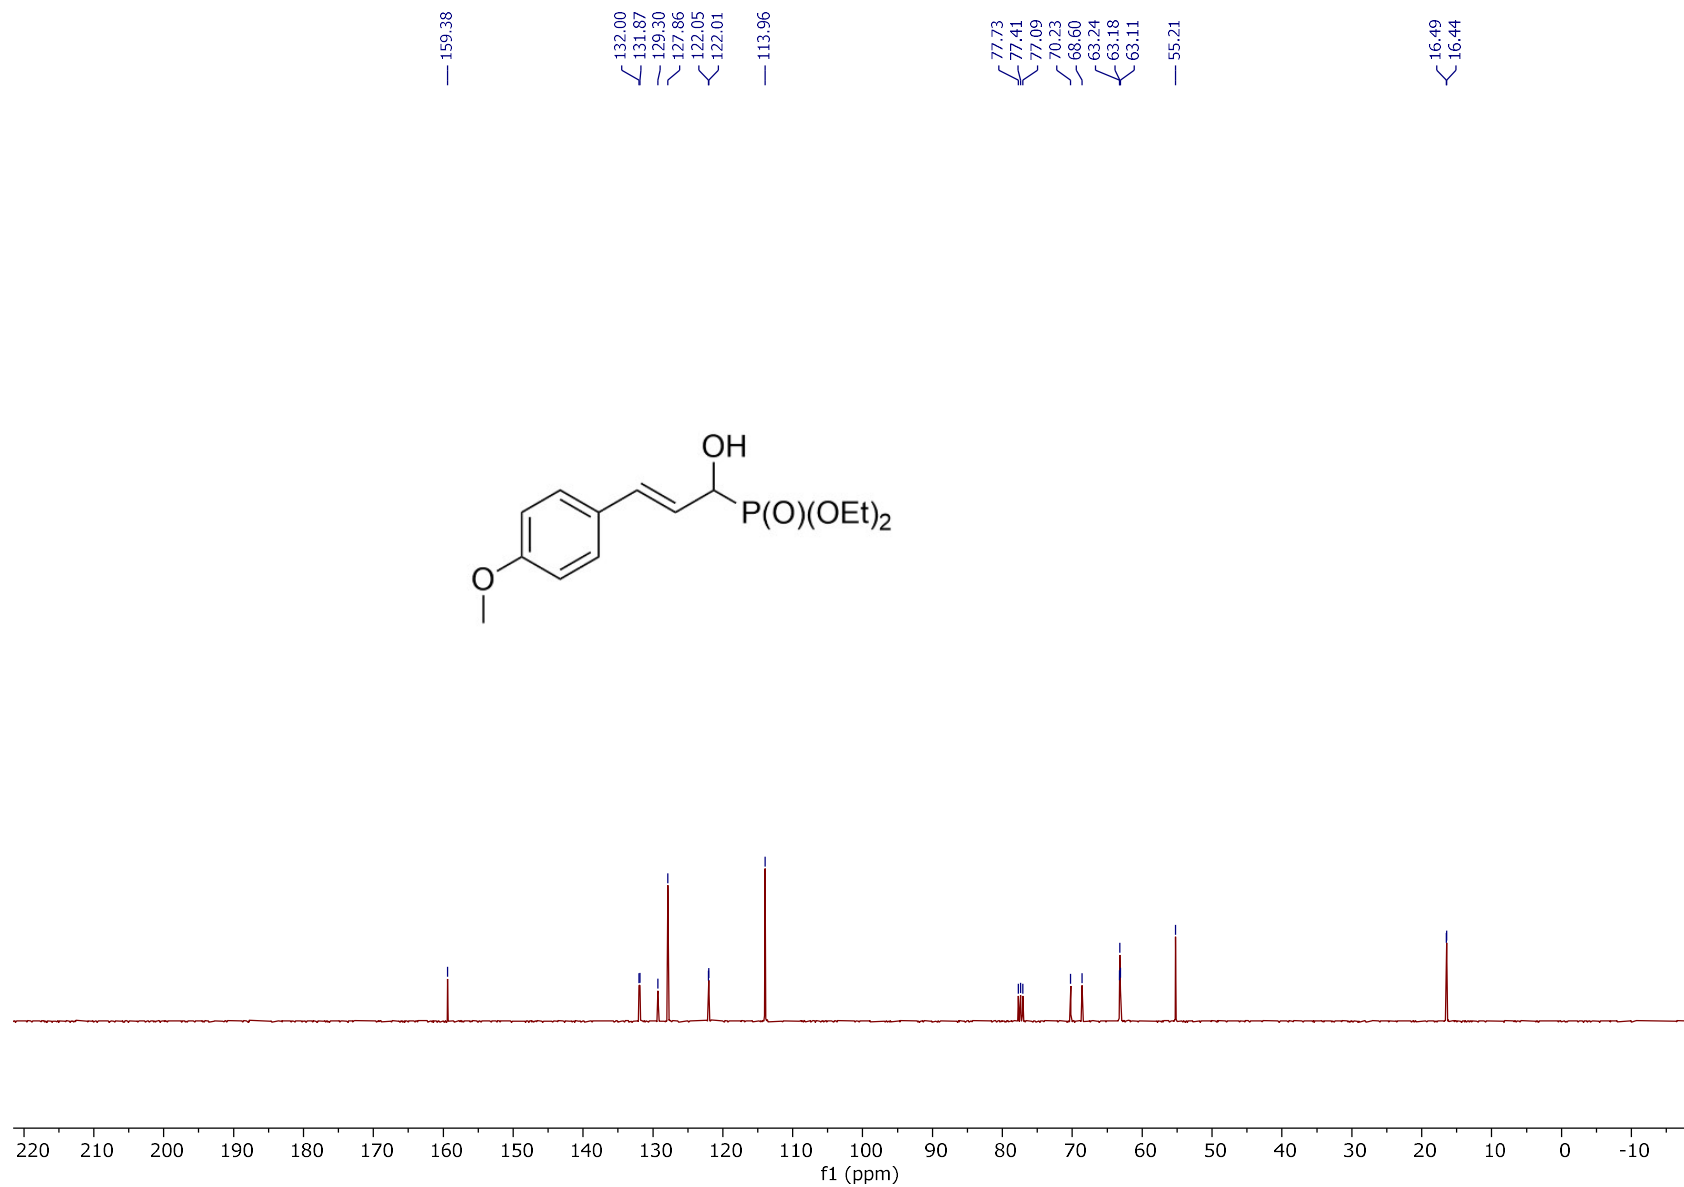

Figure S14:  $^{13}\text{C}\{^1\text{H}\}$  MR Spectra of 1e in  $\text{CDCl}_3$

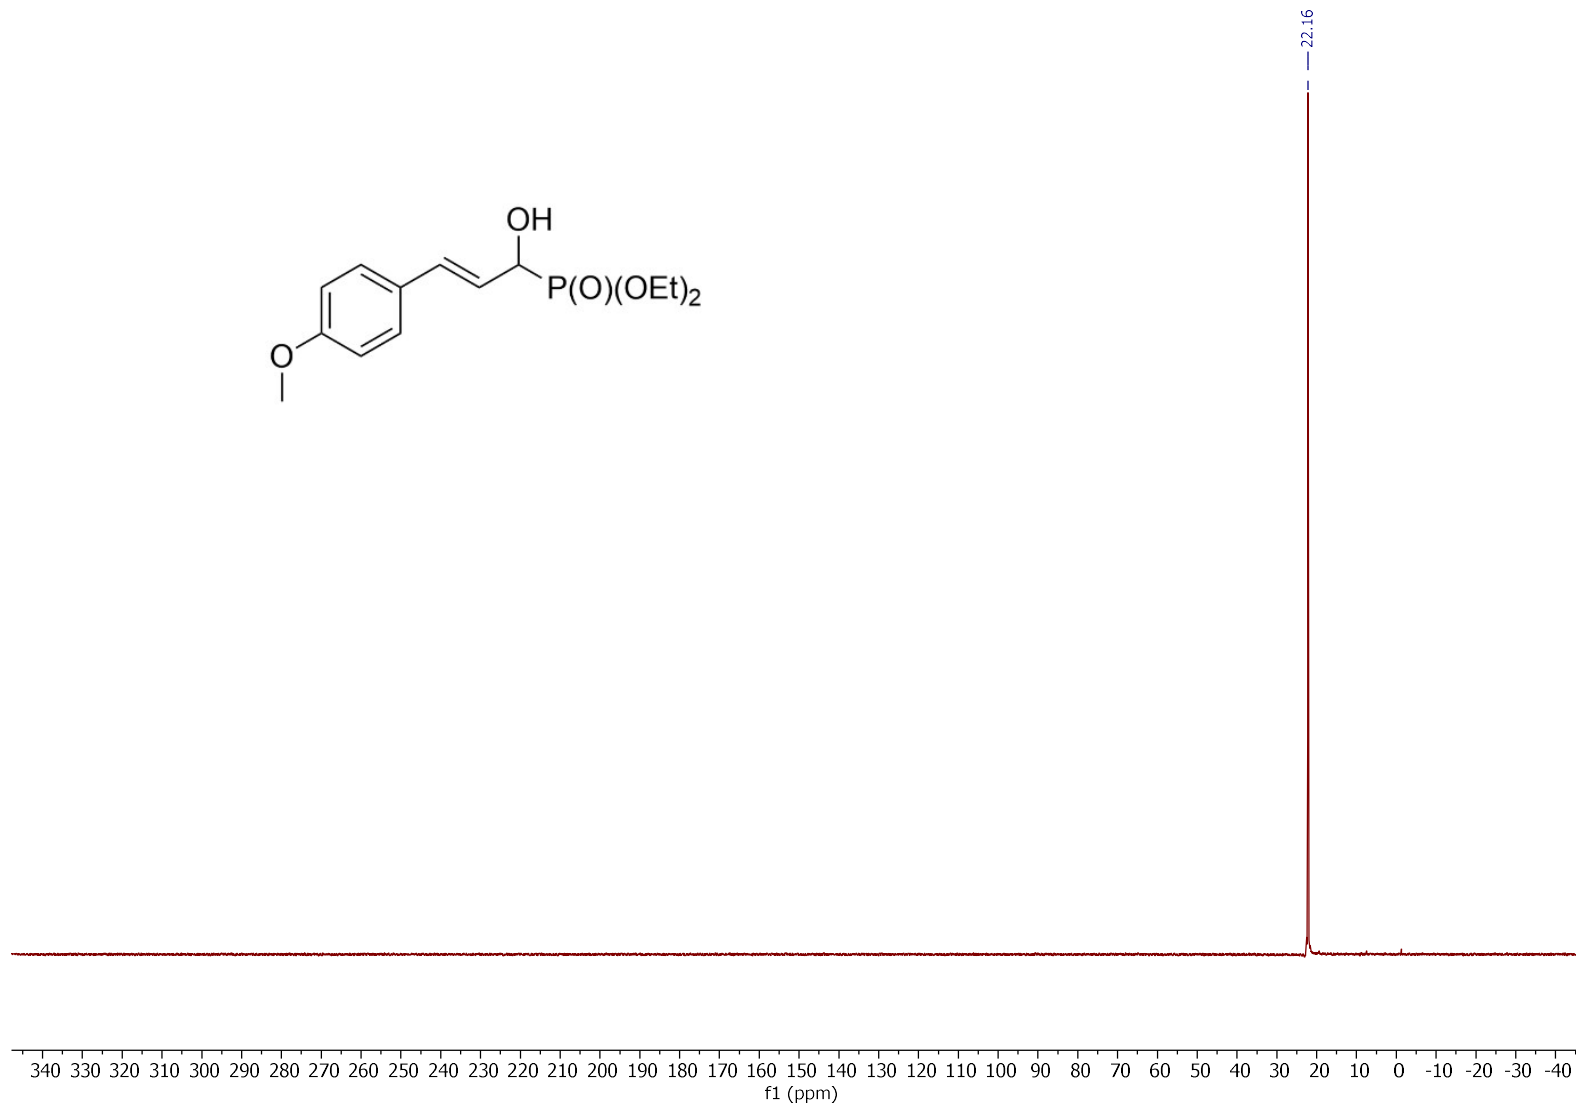

Figure S15:  $^{31}\text{P}$   $\{^1\text{H}\}$  MR Spectra of **1e** in  $\text{CDCl}_3$

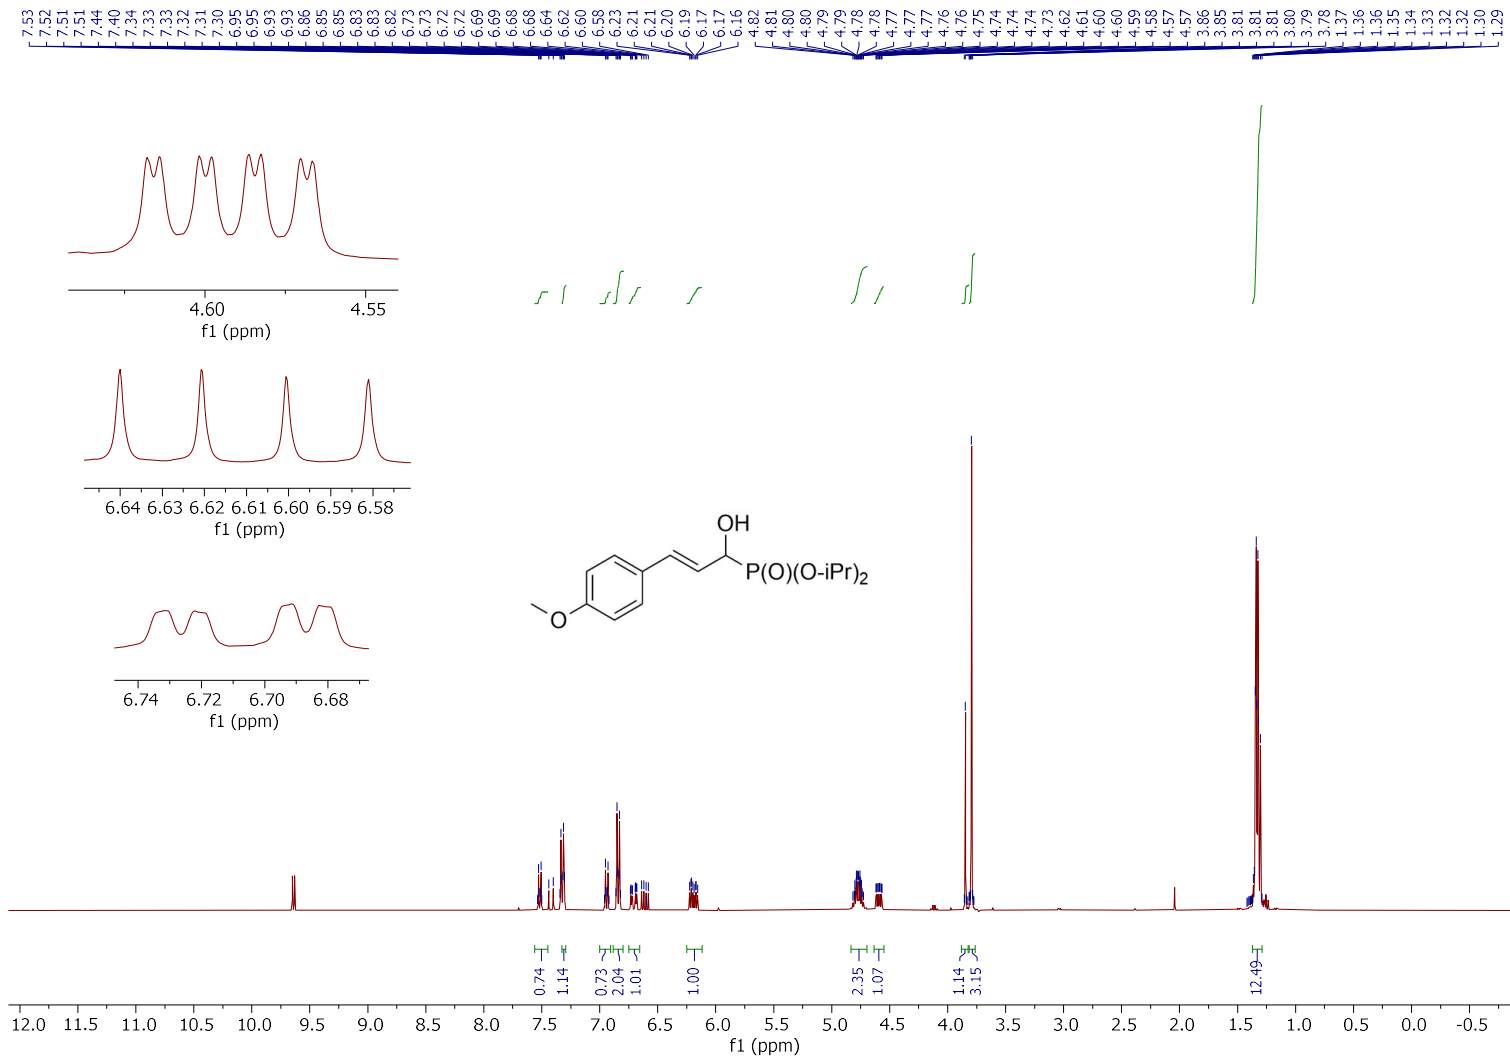

Figure S16:  $^1\text{H}$  NMR Spectra of 1f in  $\text{CDCl}_3$

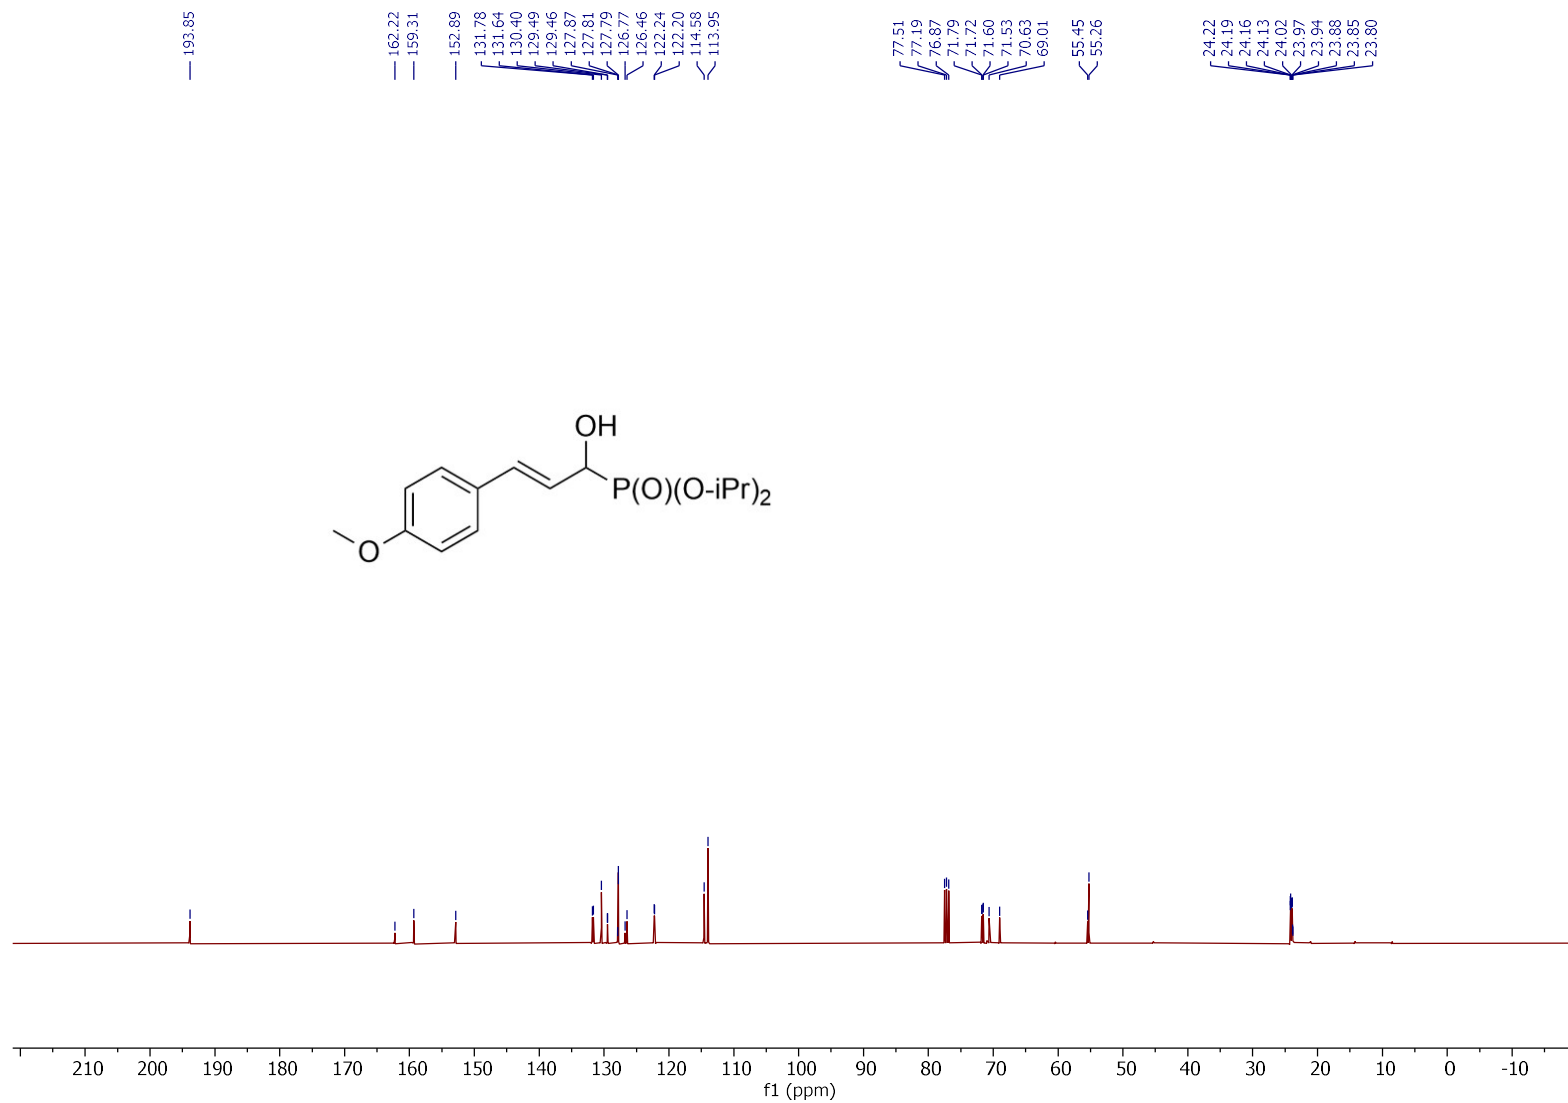

Figure S17:  $^{13}\text{C}\{^1\text{H}\}$  NMR Spectra of 1f in  $\text{CDCl}_3$

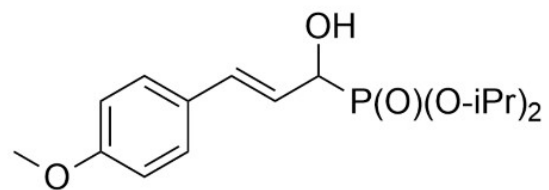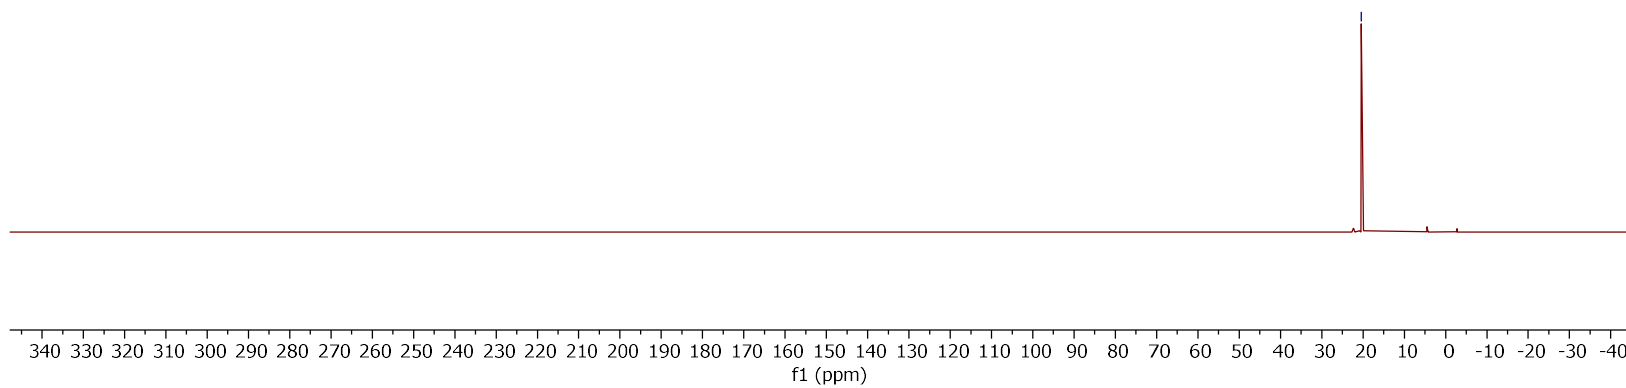

**Figure S18:**  $^{31}\text{P}\{^1\text{H}\}$  NMR Spectra of 1f in  $\text{CDCl}_3$

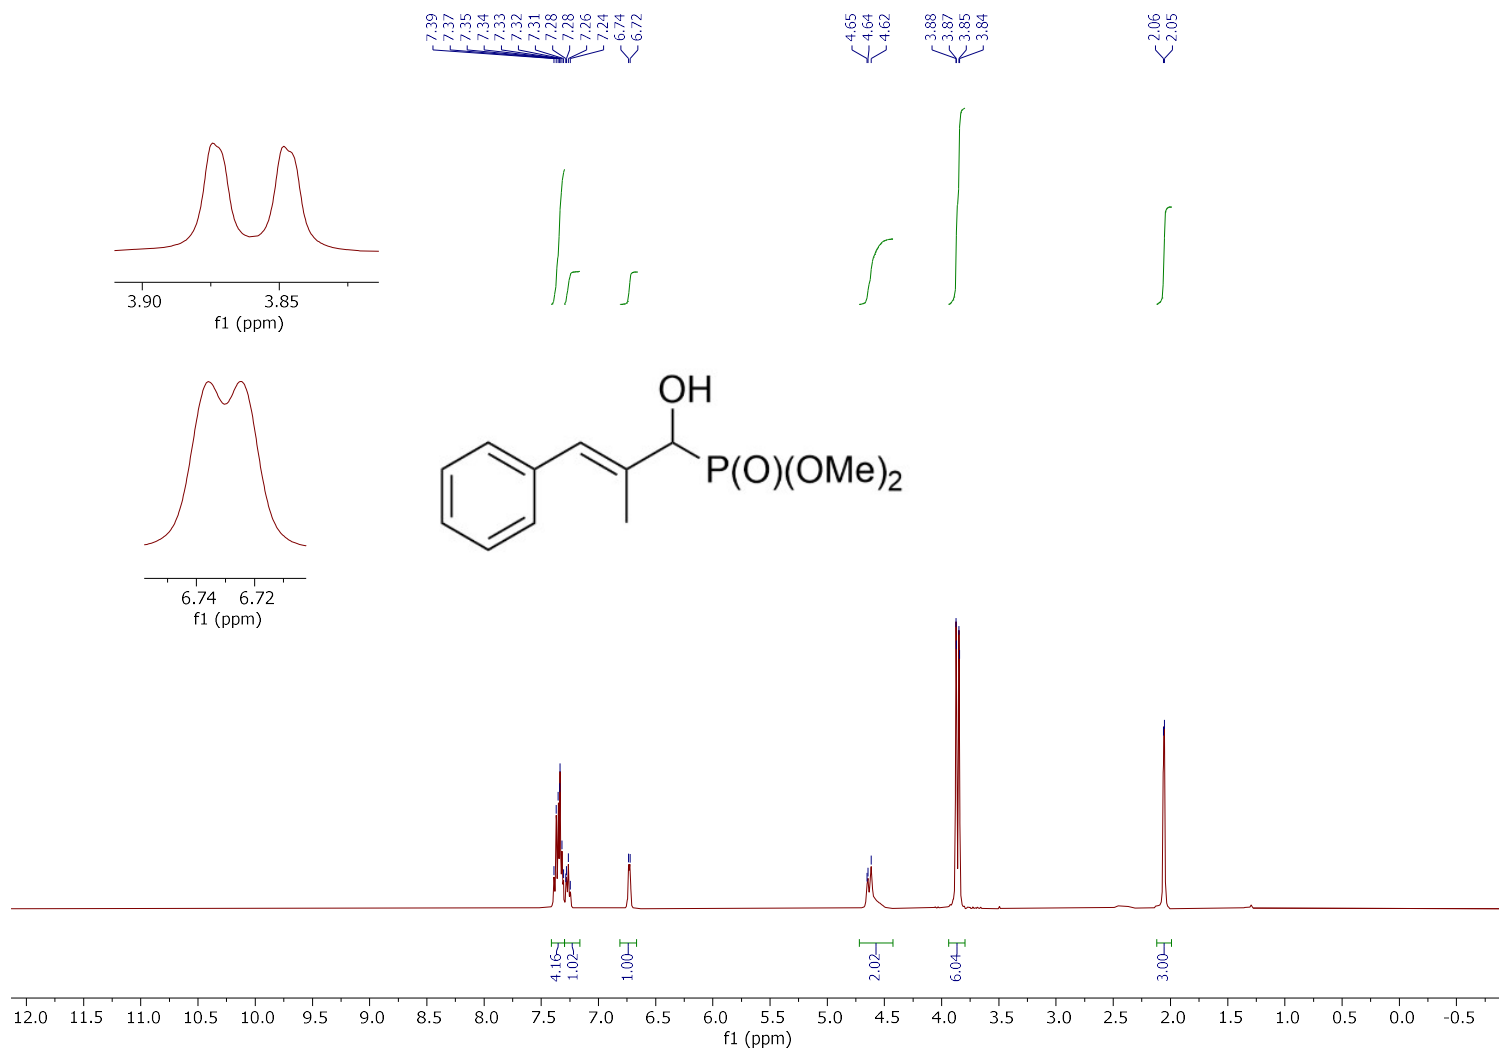

**Figure S19:  $^1\text{H}$  NMR Spectra of 1g in  $\text{CDCl}_3$**

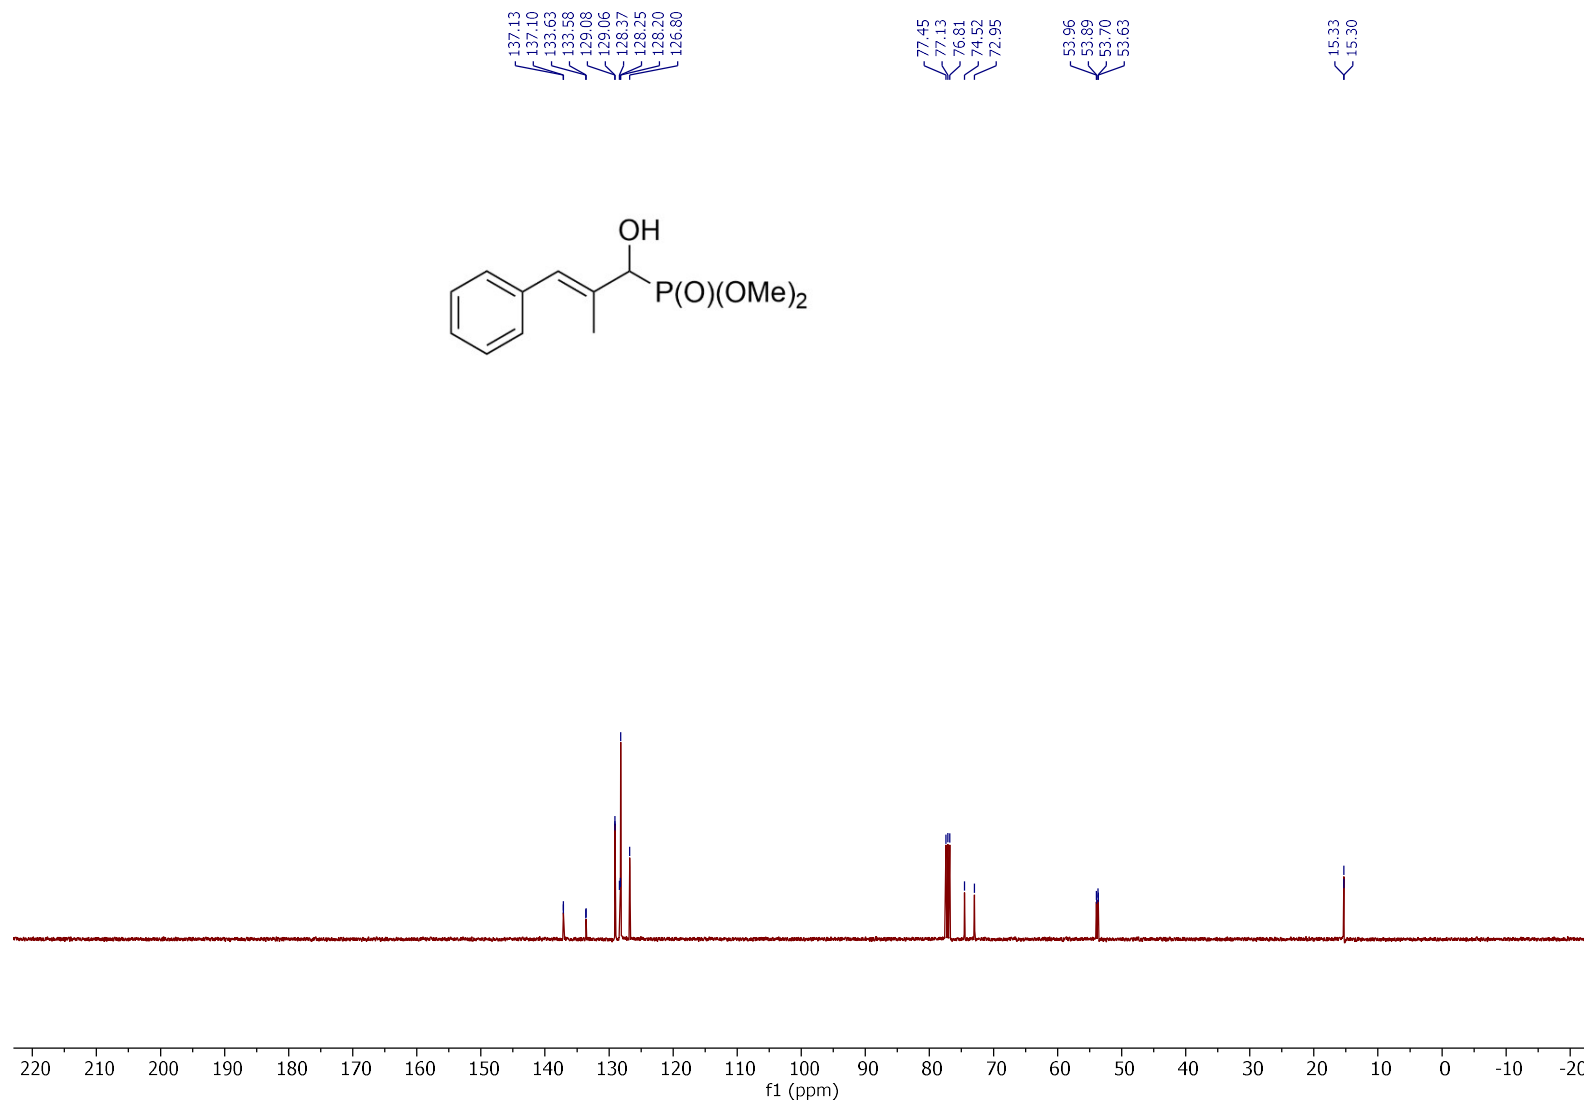

Figure S20:  $^{13}\text{C}\{^1\text{H}\}$  NMR Spectra of 1g in  $\text{CDCl}_3$

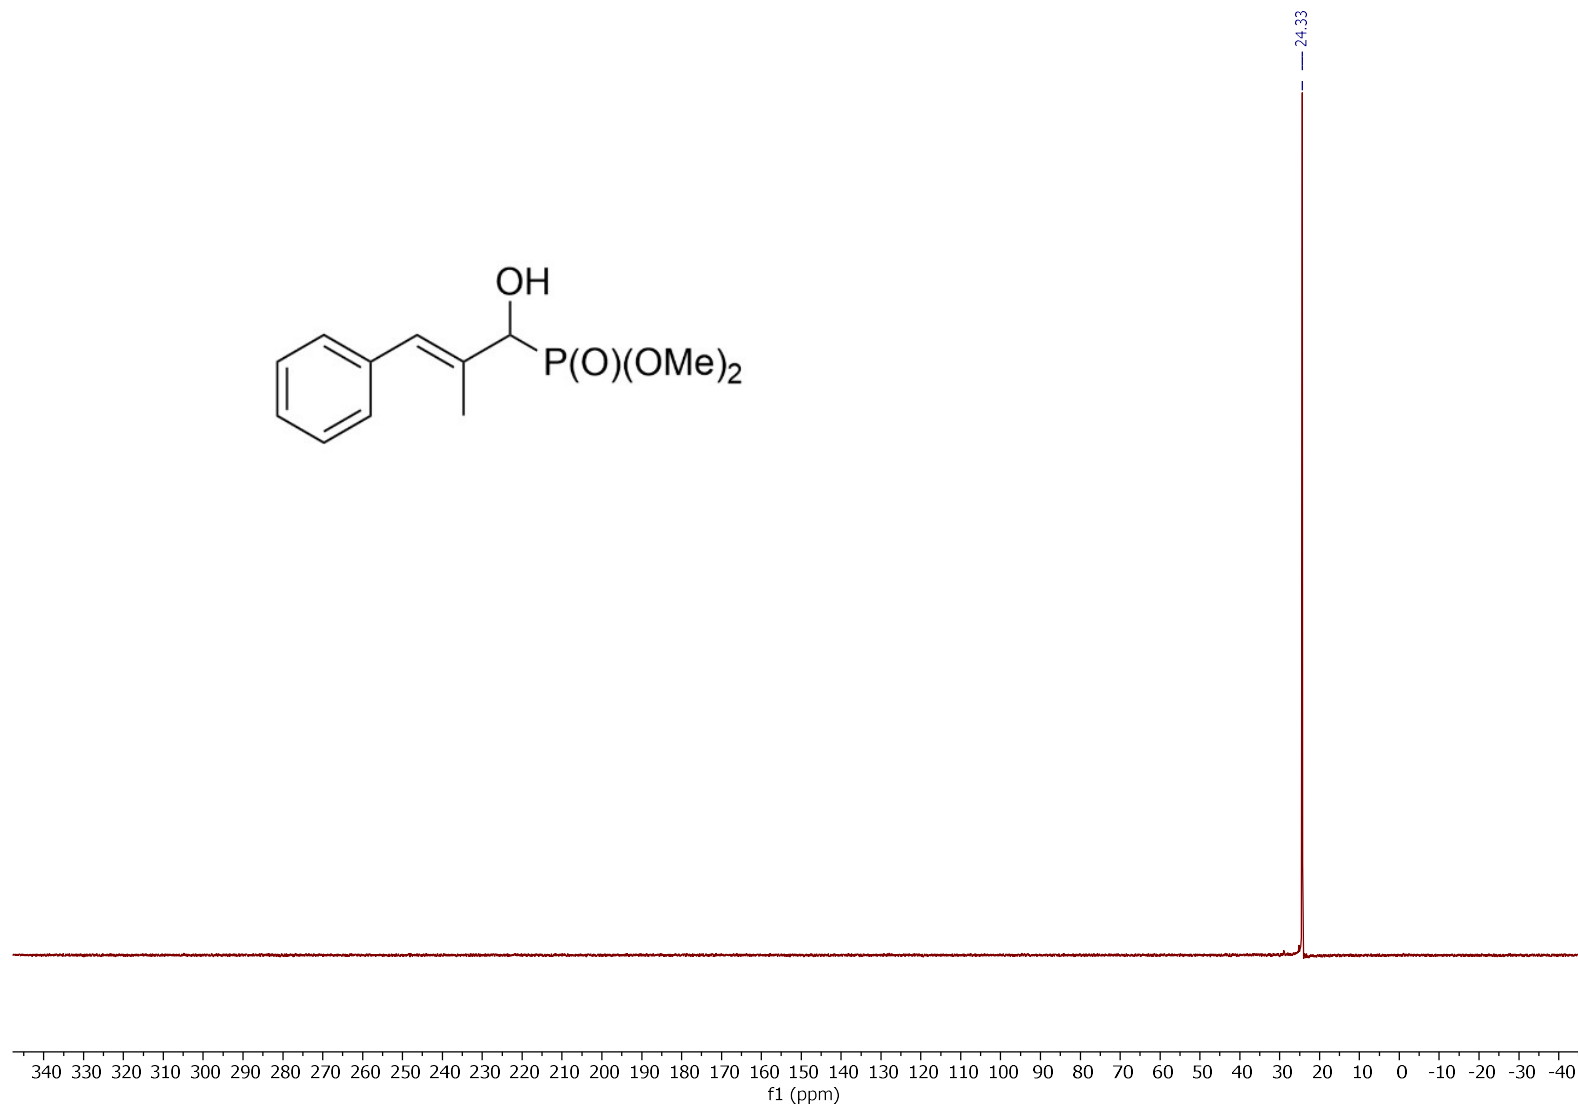

Figure S21:  $^{31}\text{P}\{^1\text{H}\}$  NMR Spectra of 1g in  $\text{CDCl}_3$

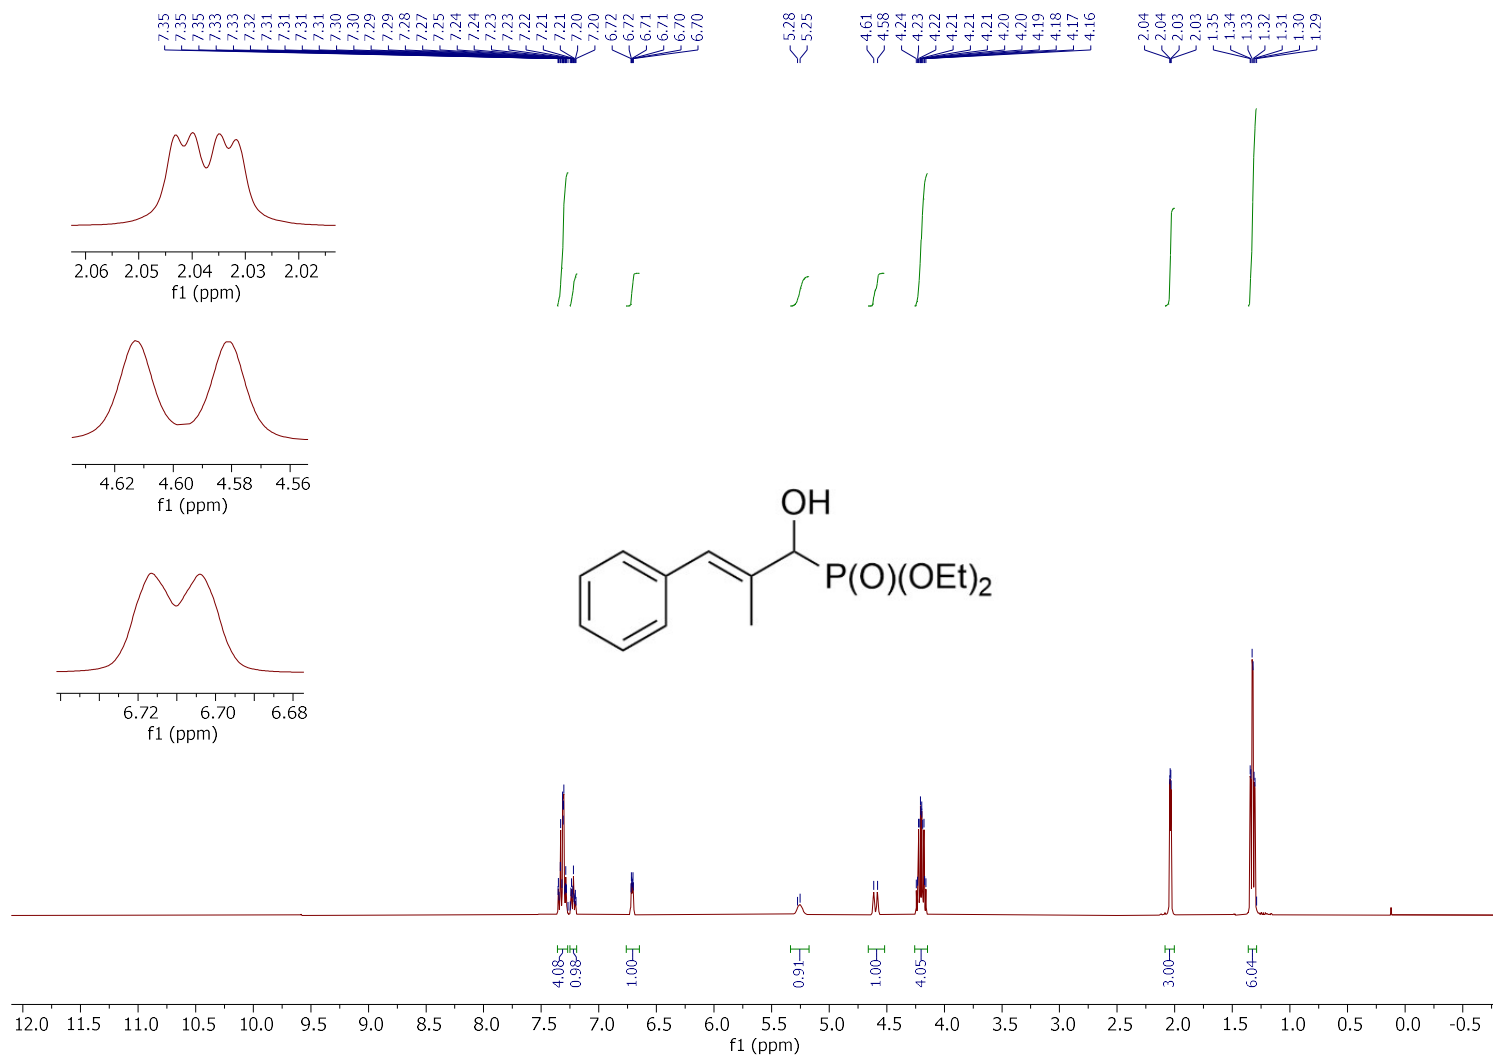

Figure S22: <sup>1</sup>H NMR Spectra of 1h in CDCl<sub>3</sub>

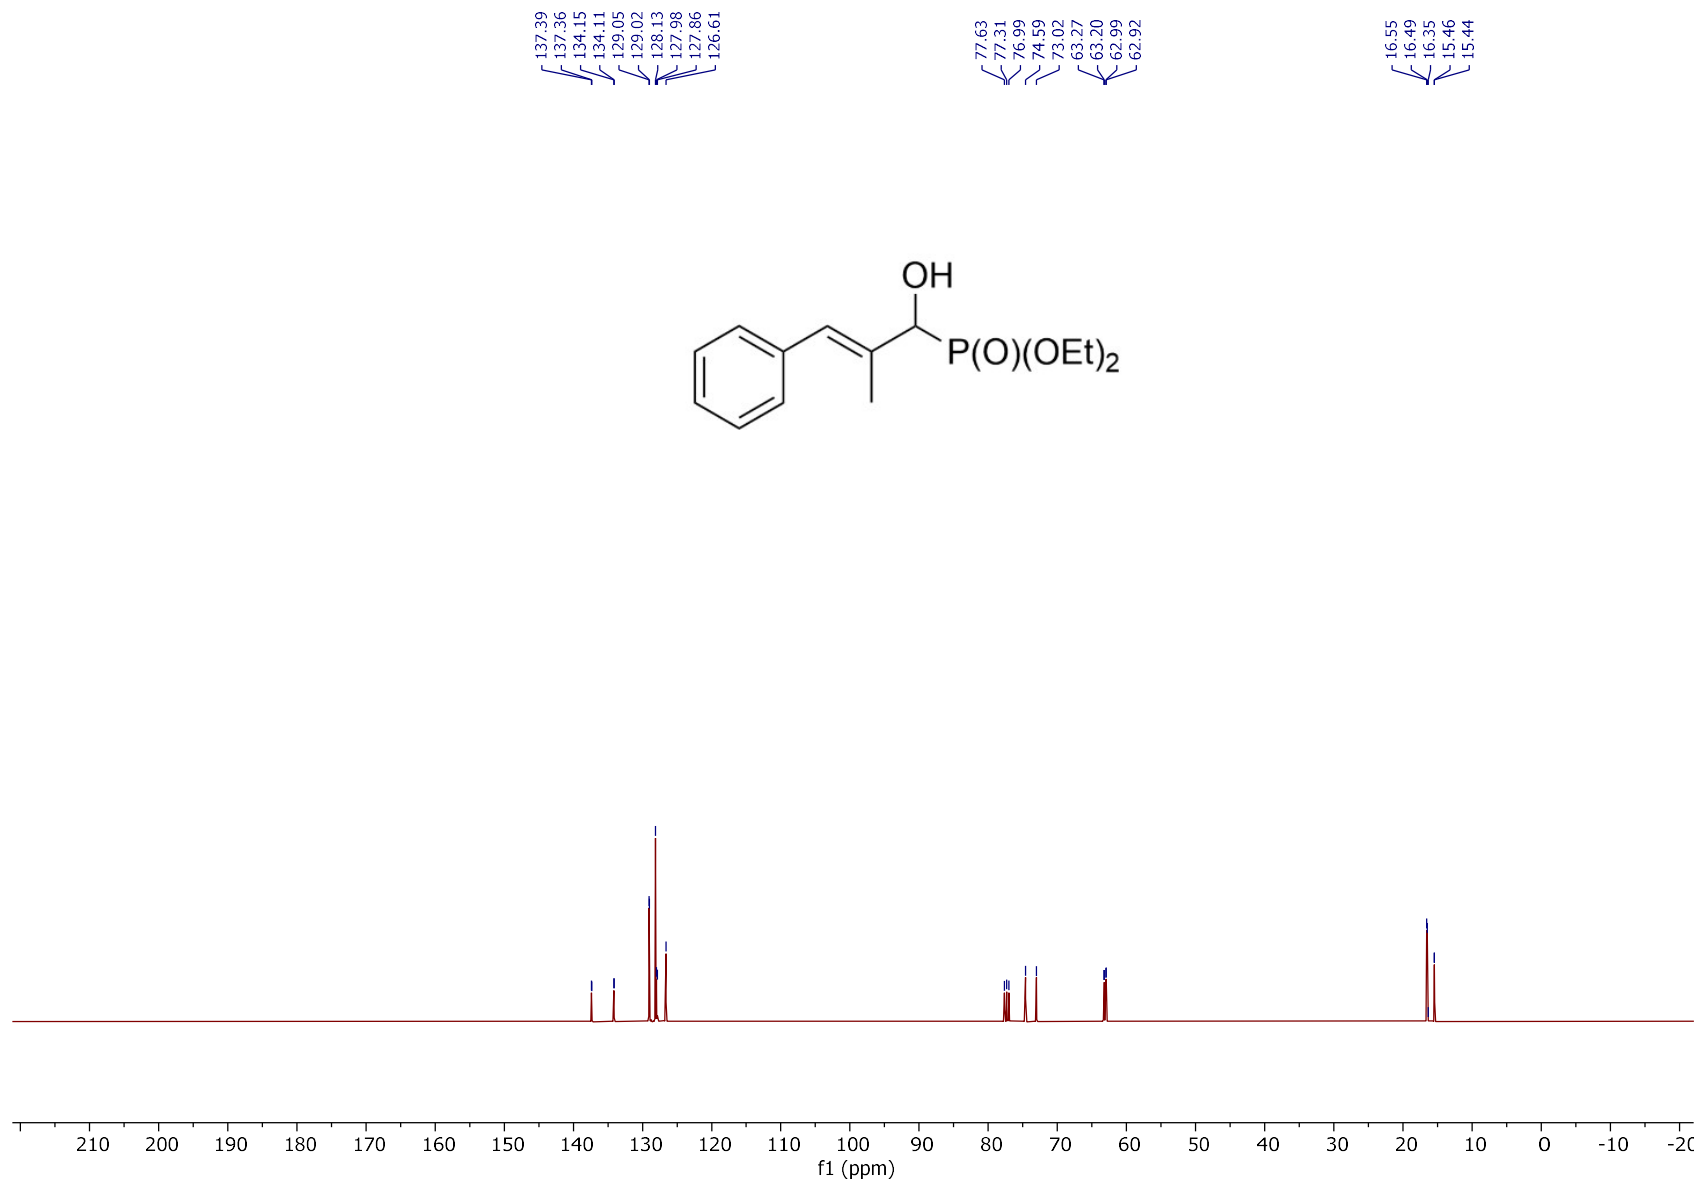

Figure S23:  $^{13}\text{C}\{^1\text{H}\}$  NMR Spectra of 1h in  $\text{CDCl}_3$

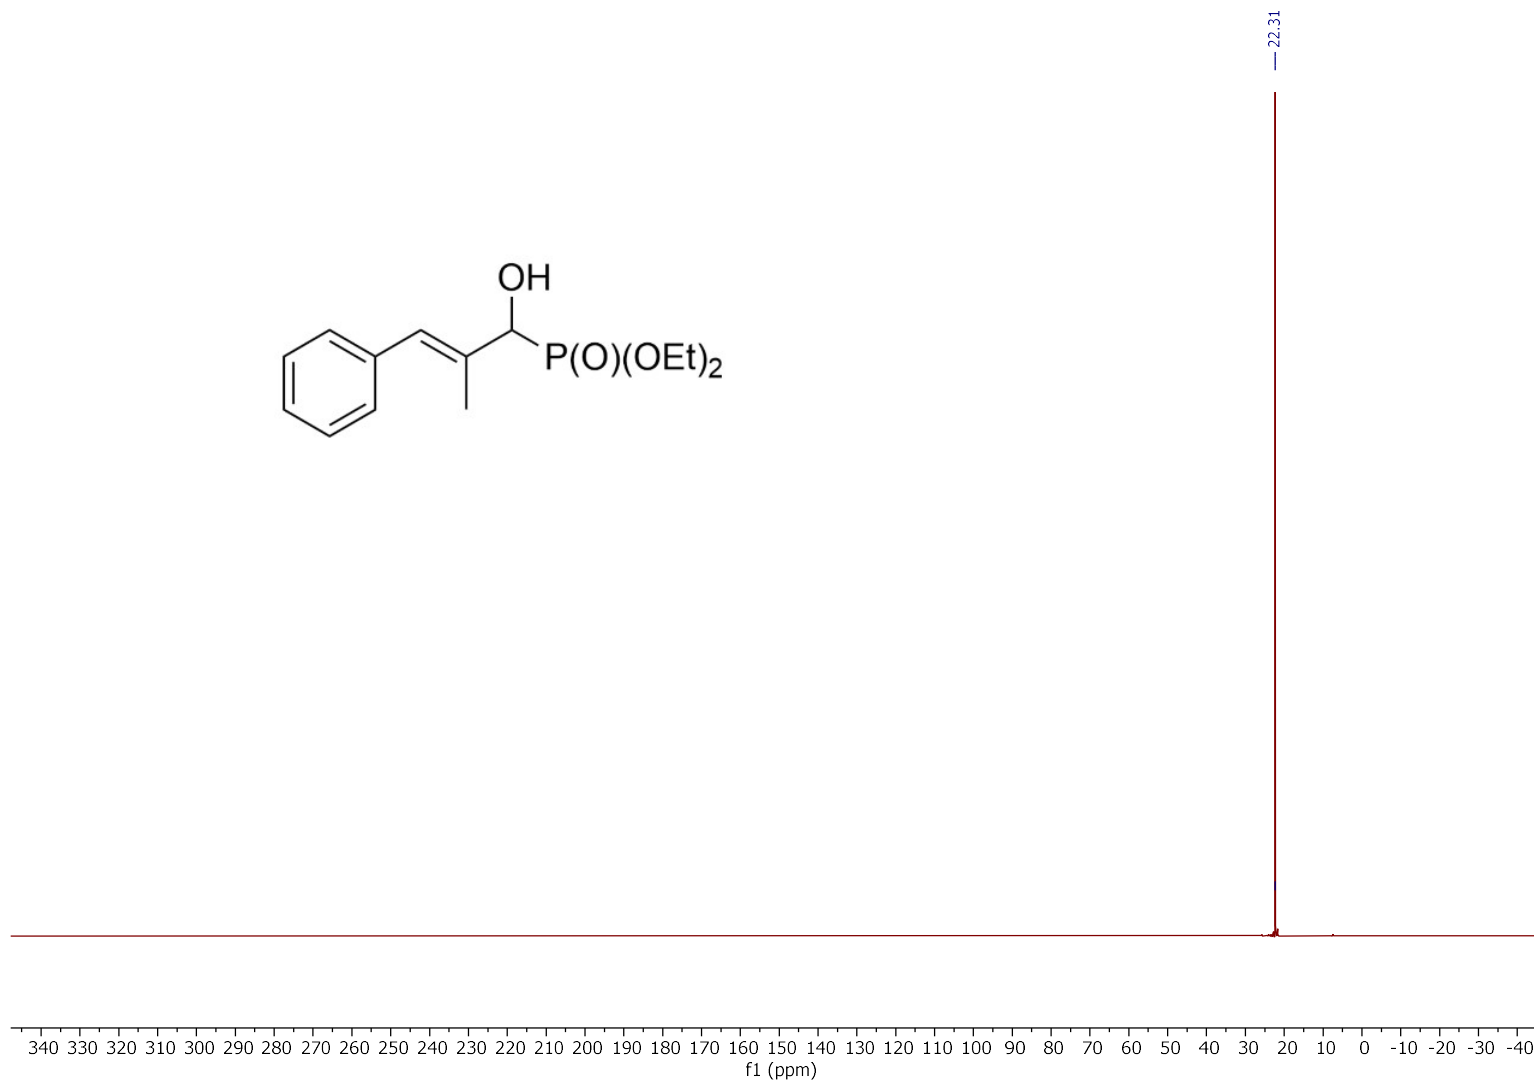

Figure S24:  $^{31}\text{P}\{^1\text{H}\}$  NMR Spectra of 1h in  $\text{CDCl}_3$

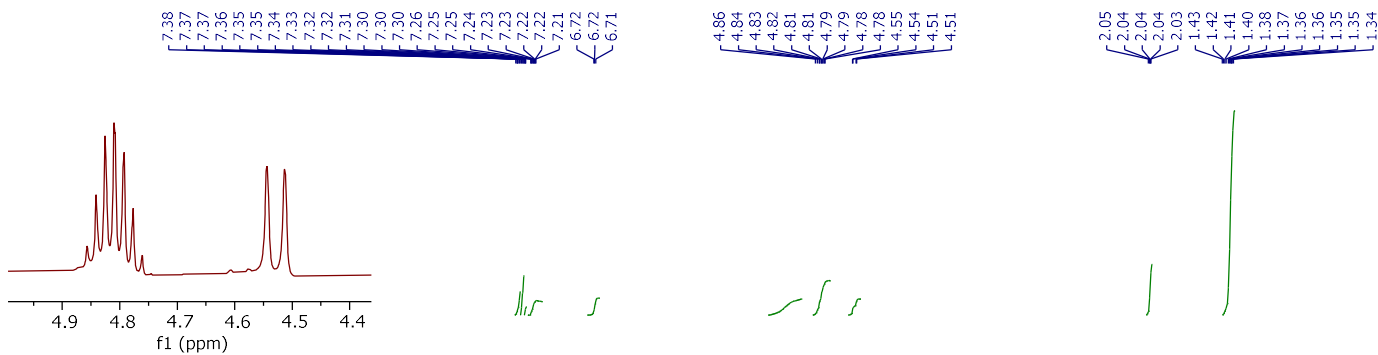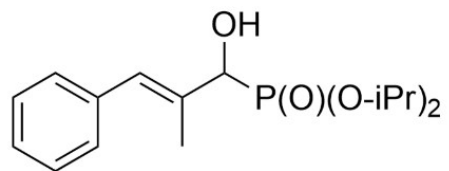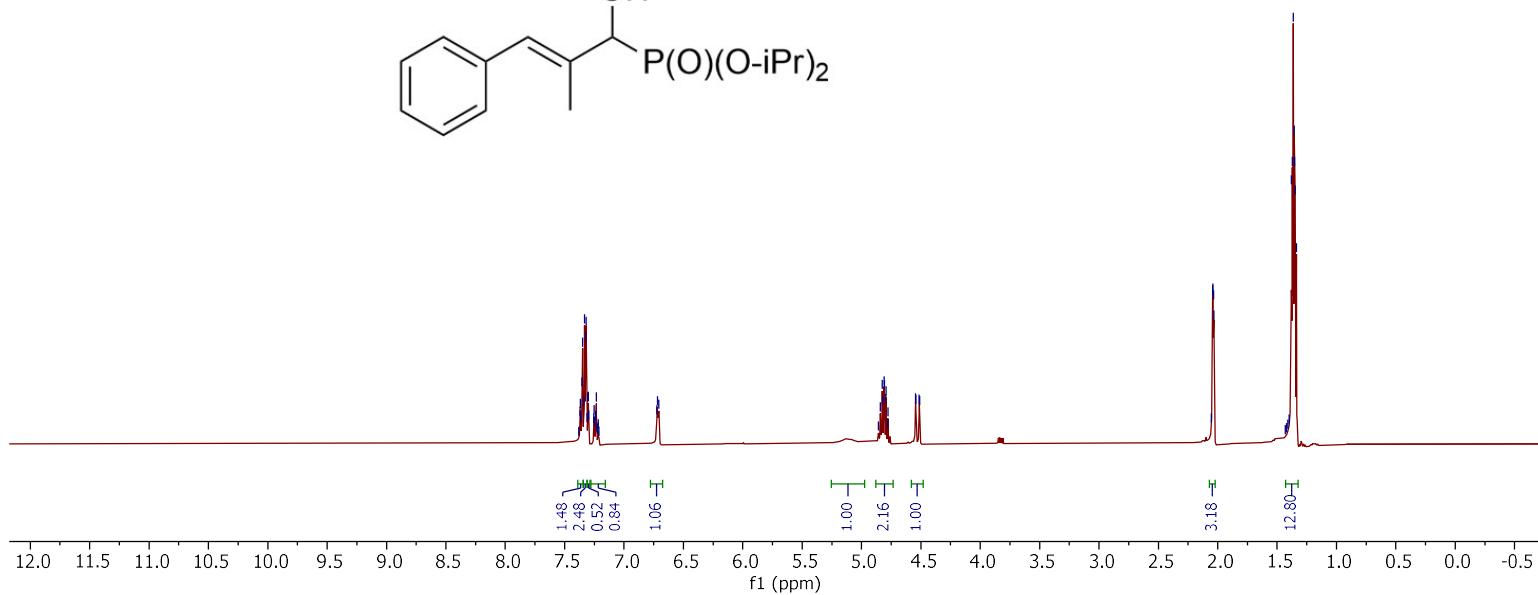

Figure S25:  $^1\text{H}$  NMR Spectra of 1i in  $\text{CDCl}_3$

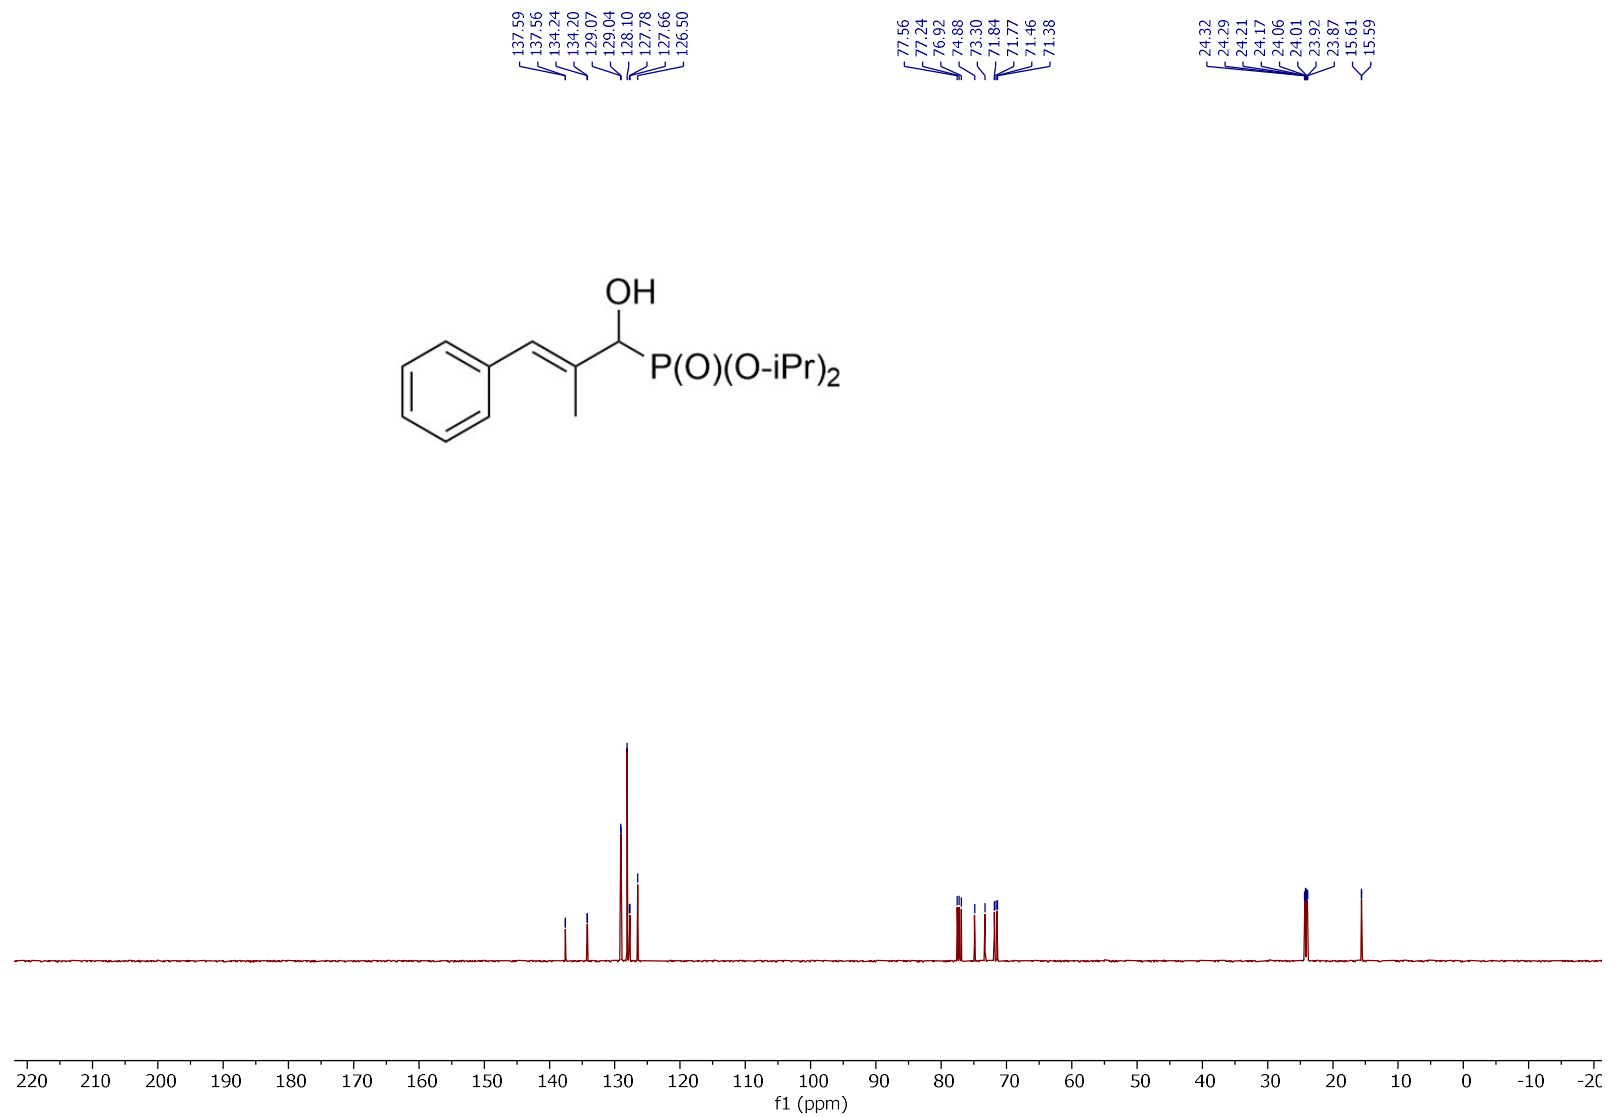

Figure S26:  $^{13}\text{C}\{^1\text{H}\}$  NMR Spectra of 1i in  $\text{CDCl}_3$

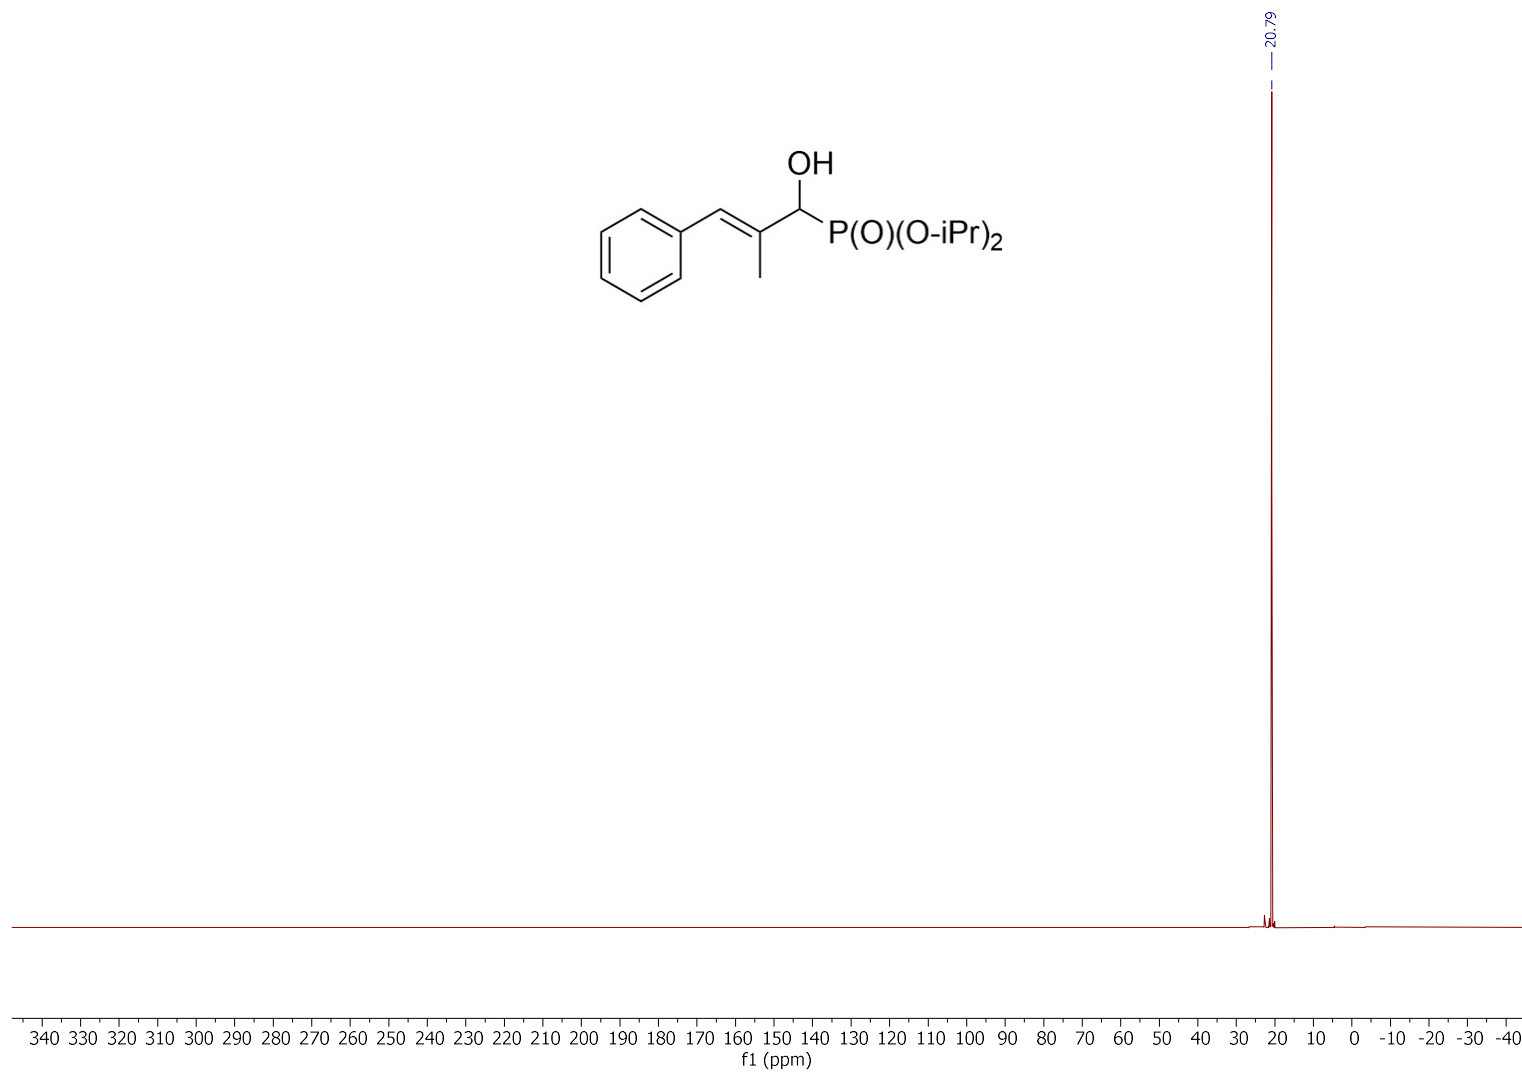

**Figure S27:**  $^{31}\text{P}\{^1\text{H}\}$  NMR Spectra of **1i** in  $\text{CDCl}_3$

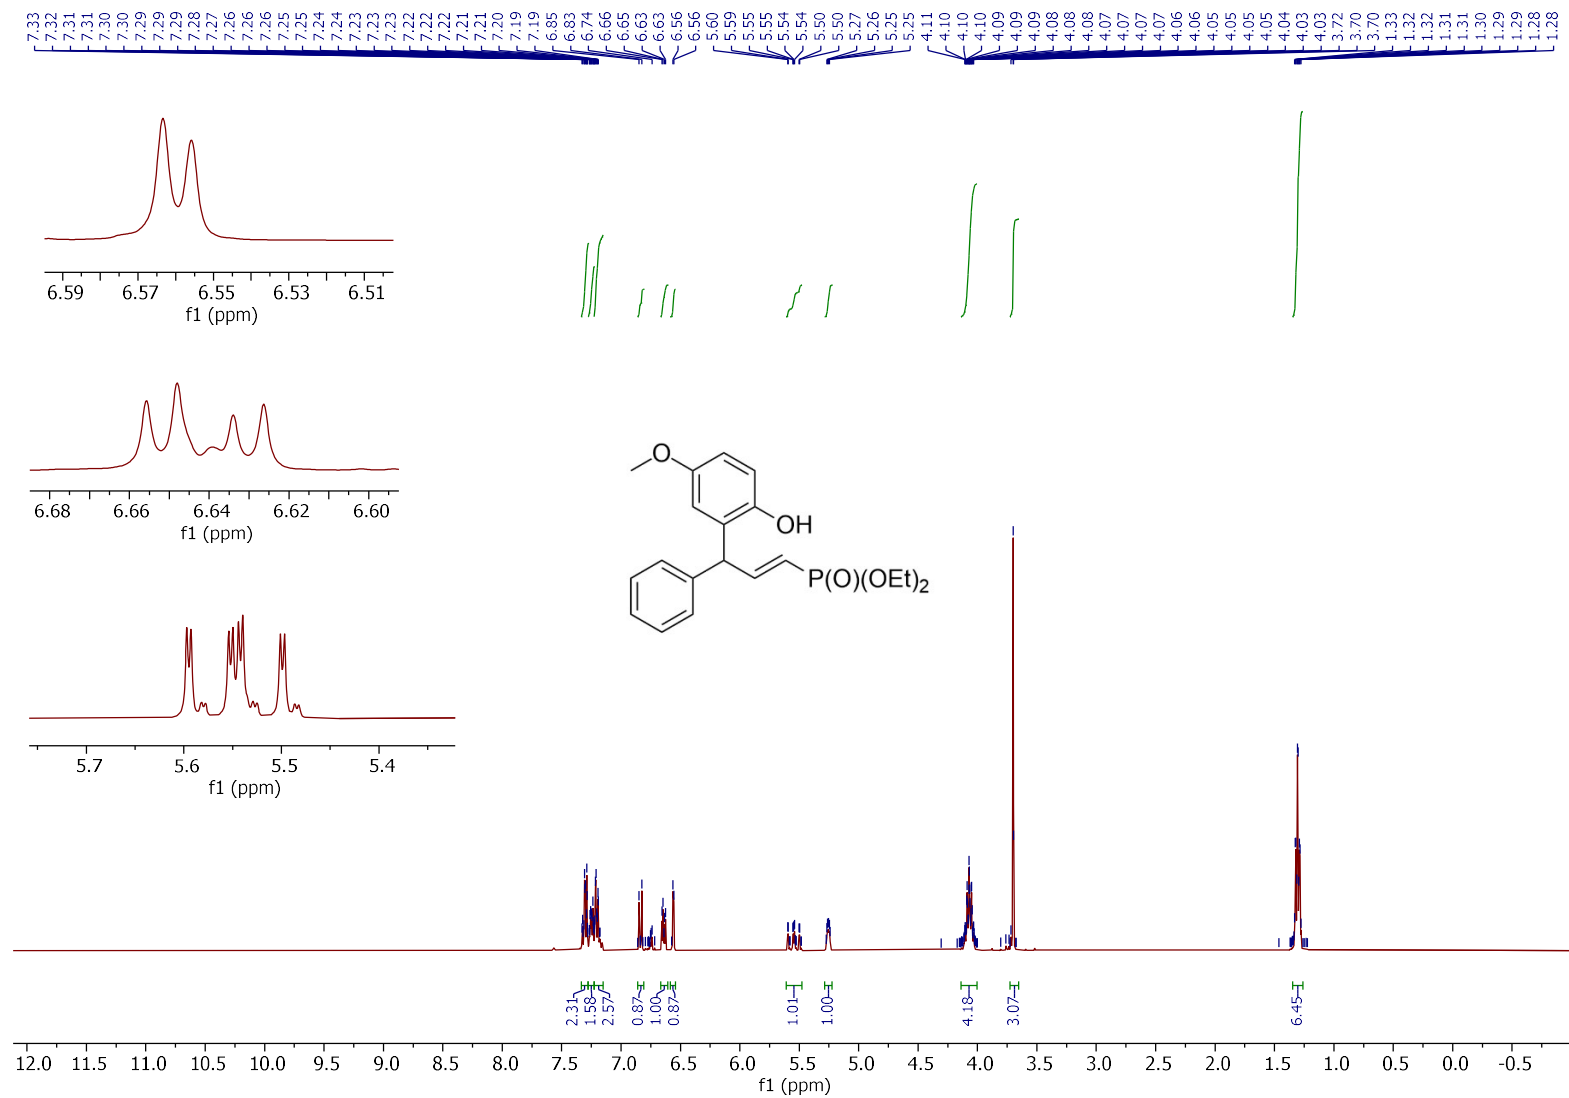

Figure S28:  $^1\text{H NMR}$  Spectra of 3a in  $\text{CDCl}_3$

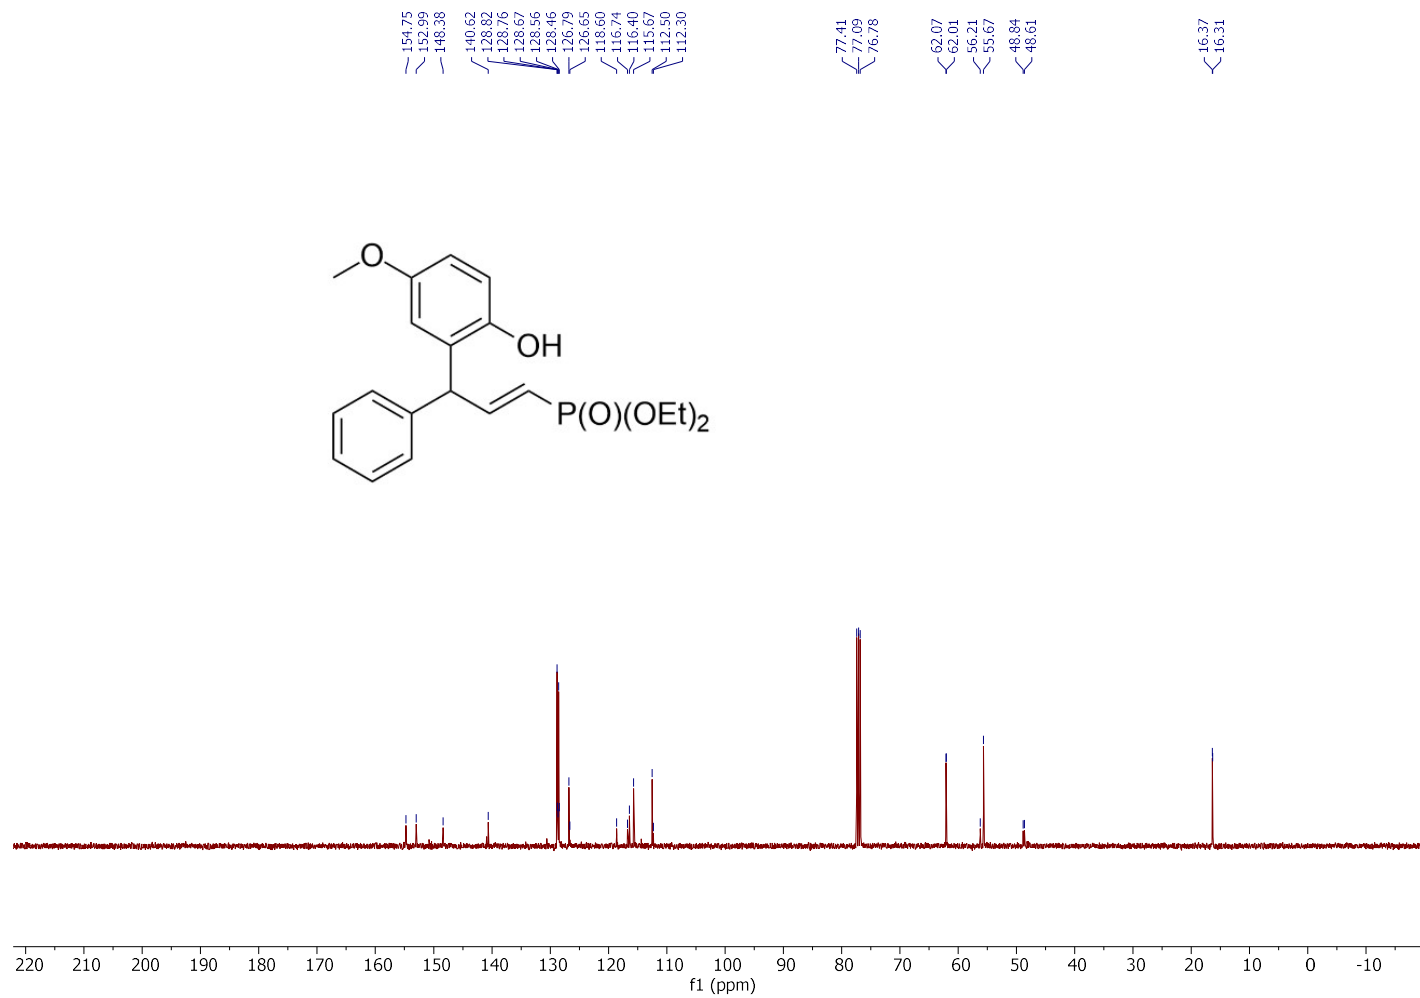

Figure S29:  $^{13}\text{C}\{^1\text{H}\}$  NMR Spectra of 3a in  $\text{CDCl}_3$

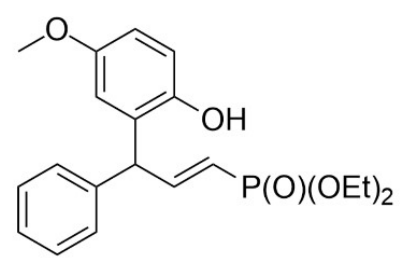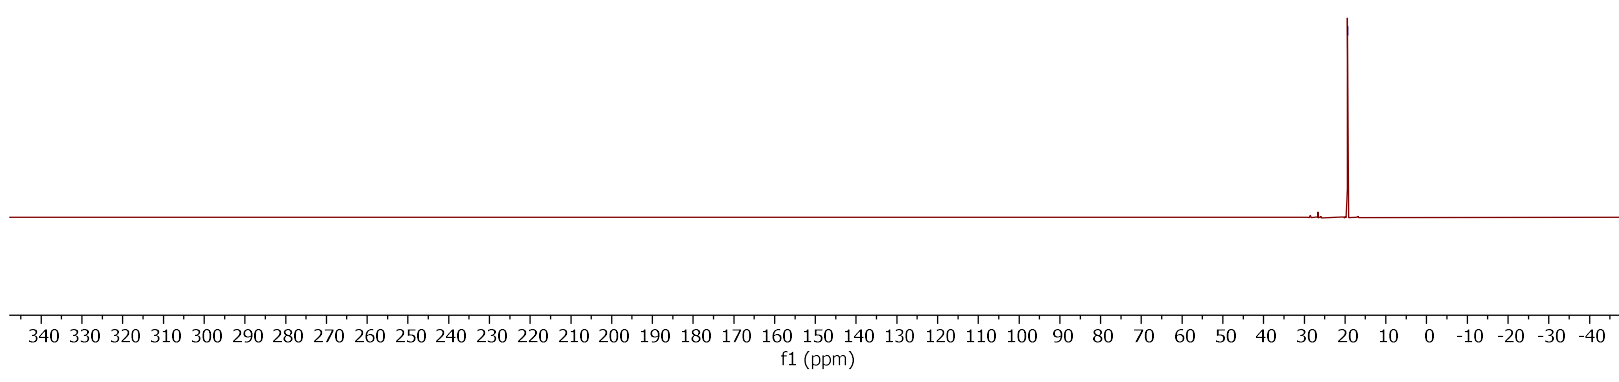

Figure S30: <sup>31</sup>P{<sup>1</sup>H} NMR Spectra of 3a in CDCl<sub>3</sub>

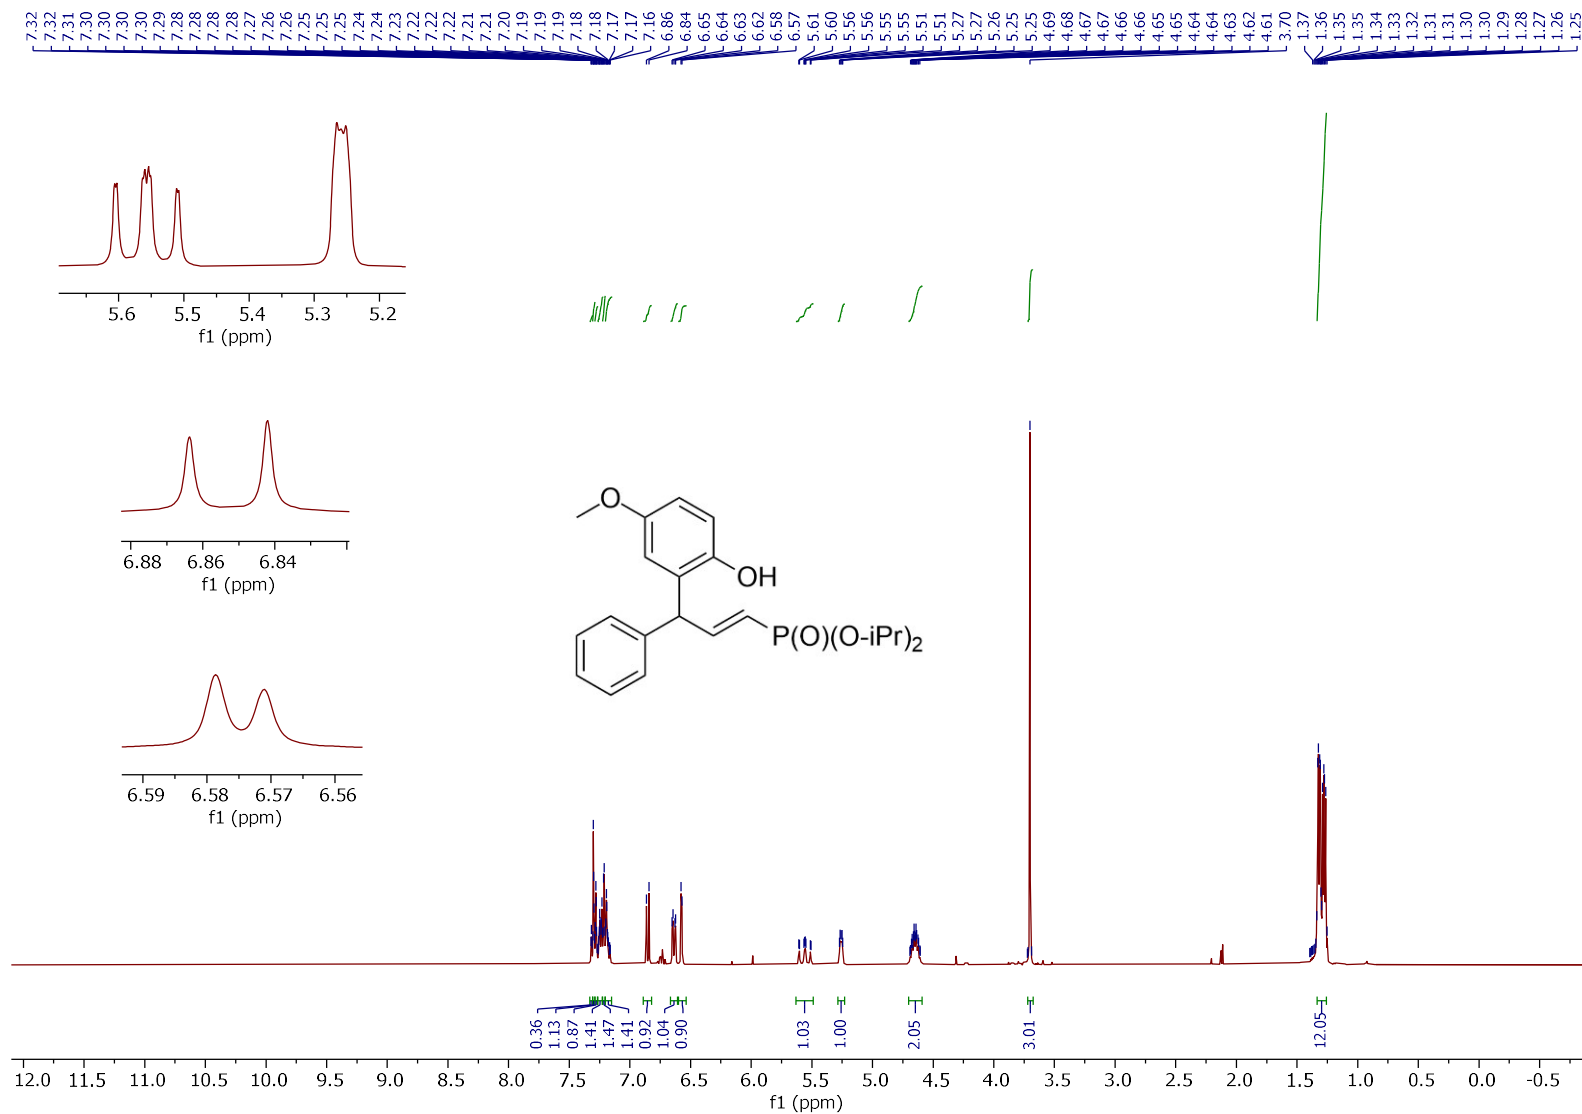

Figure S31: <sup>1</sup>H NMR Spectra of 3f in CDCl<sub>3</sub>

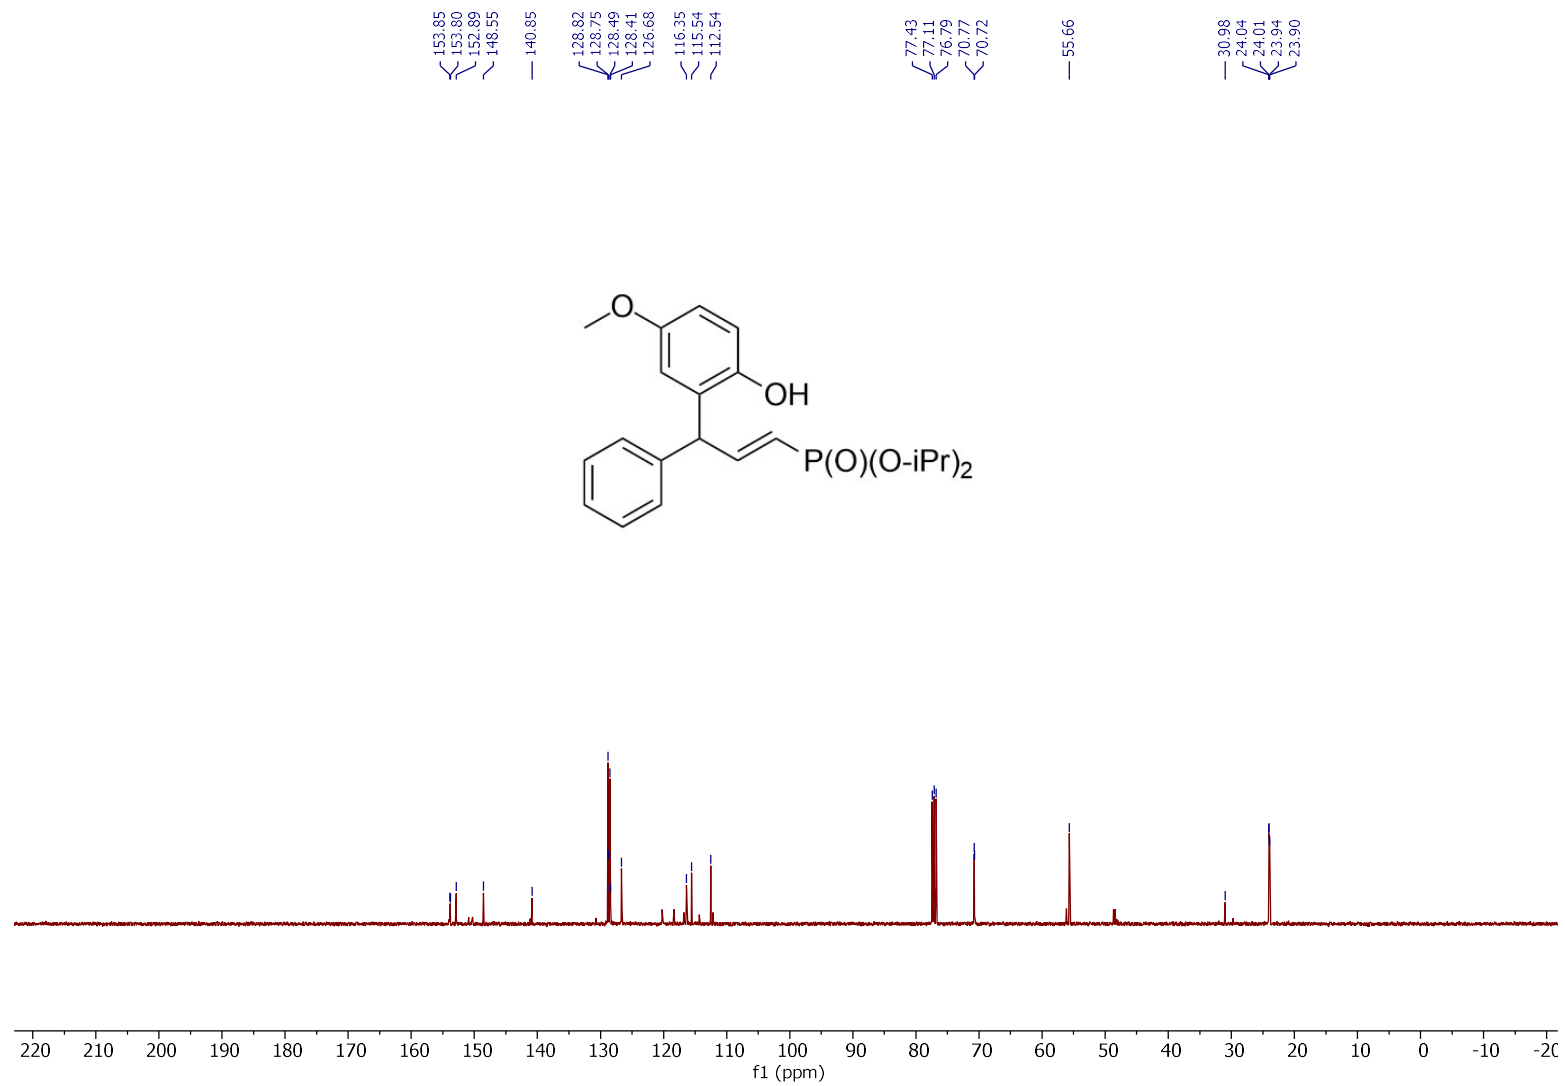

Figure S32:  $^{13}\text{C}\{^1\text{H}\}$  NMR Spectra of 3f in  $\text{CDCl}_3$

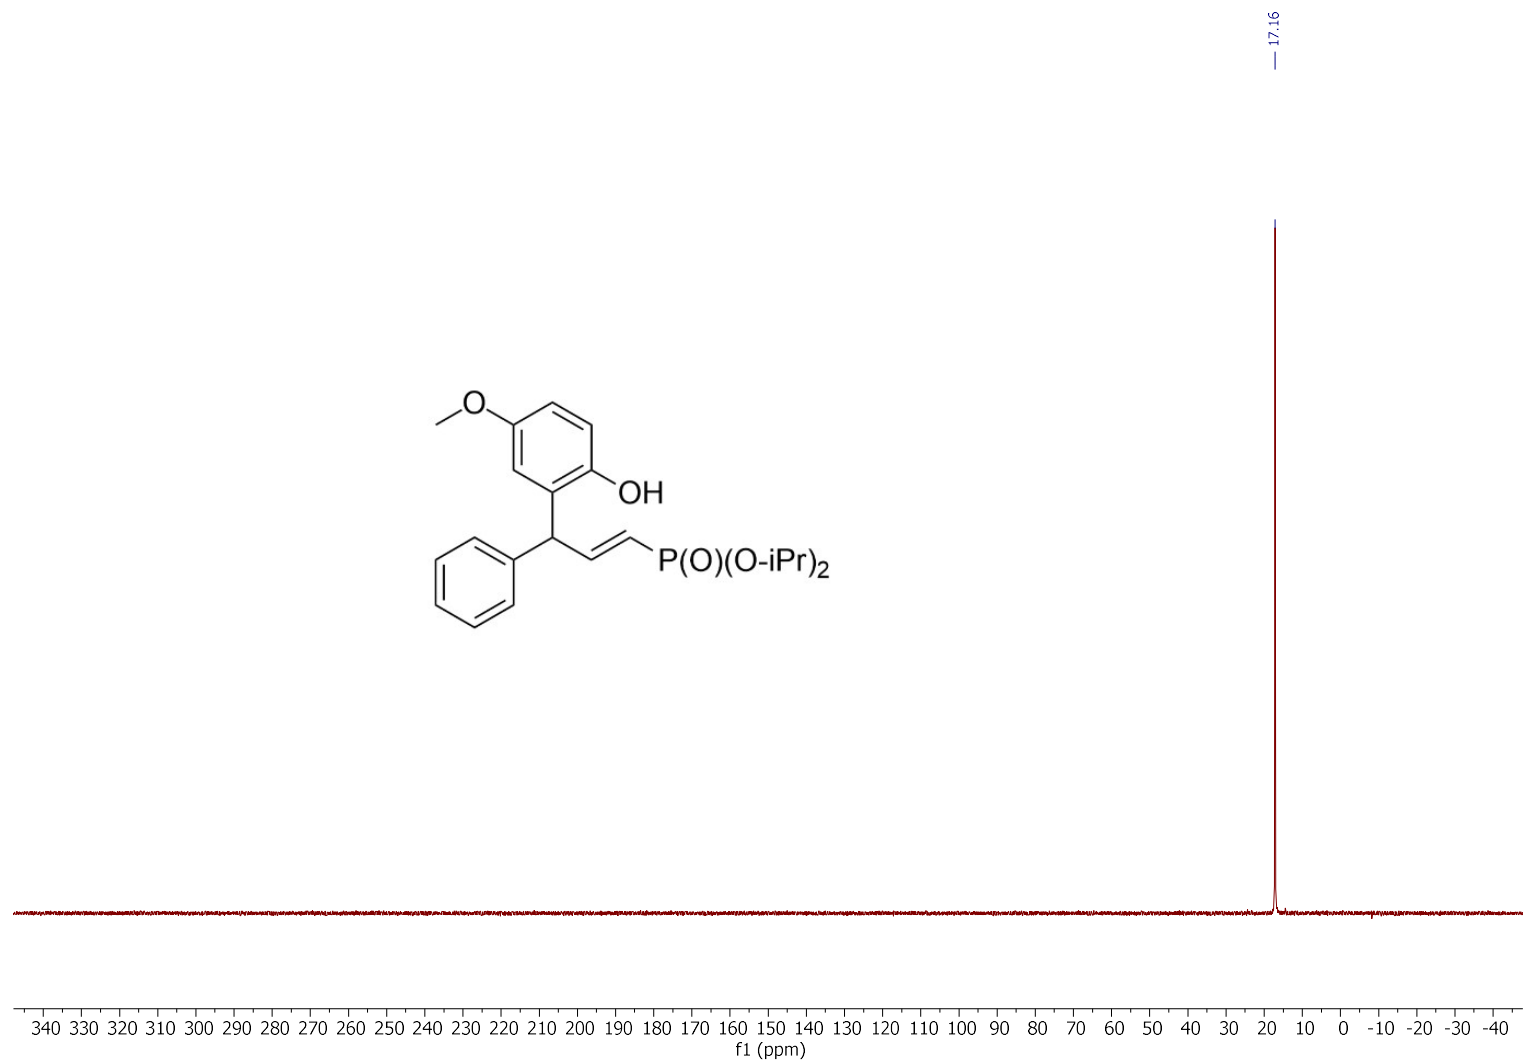

**Figure S33:**  $^{31}\text{P}\{^1\text{H}\}$  NMR Spectra of **3f** in  $\text{CDCl}_3$

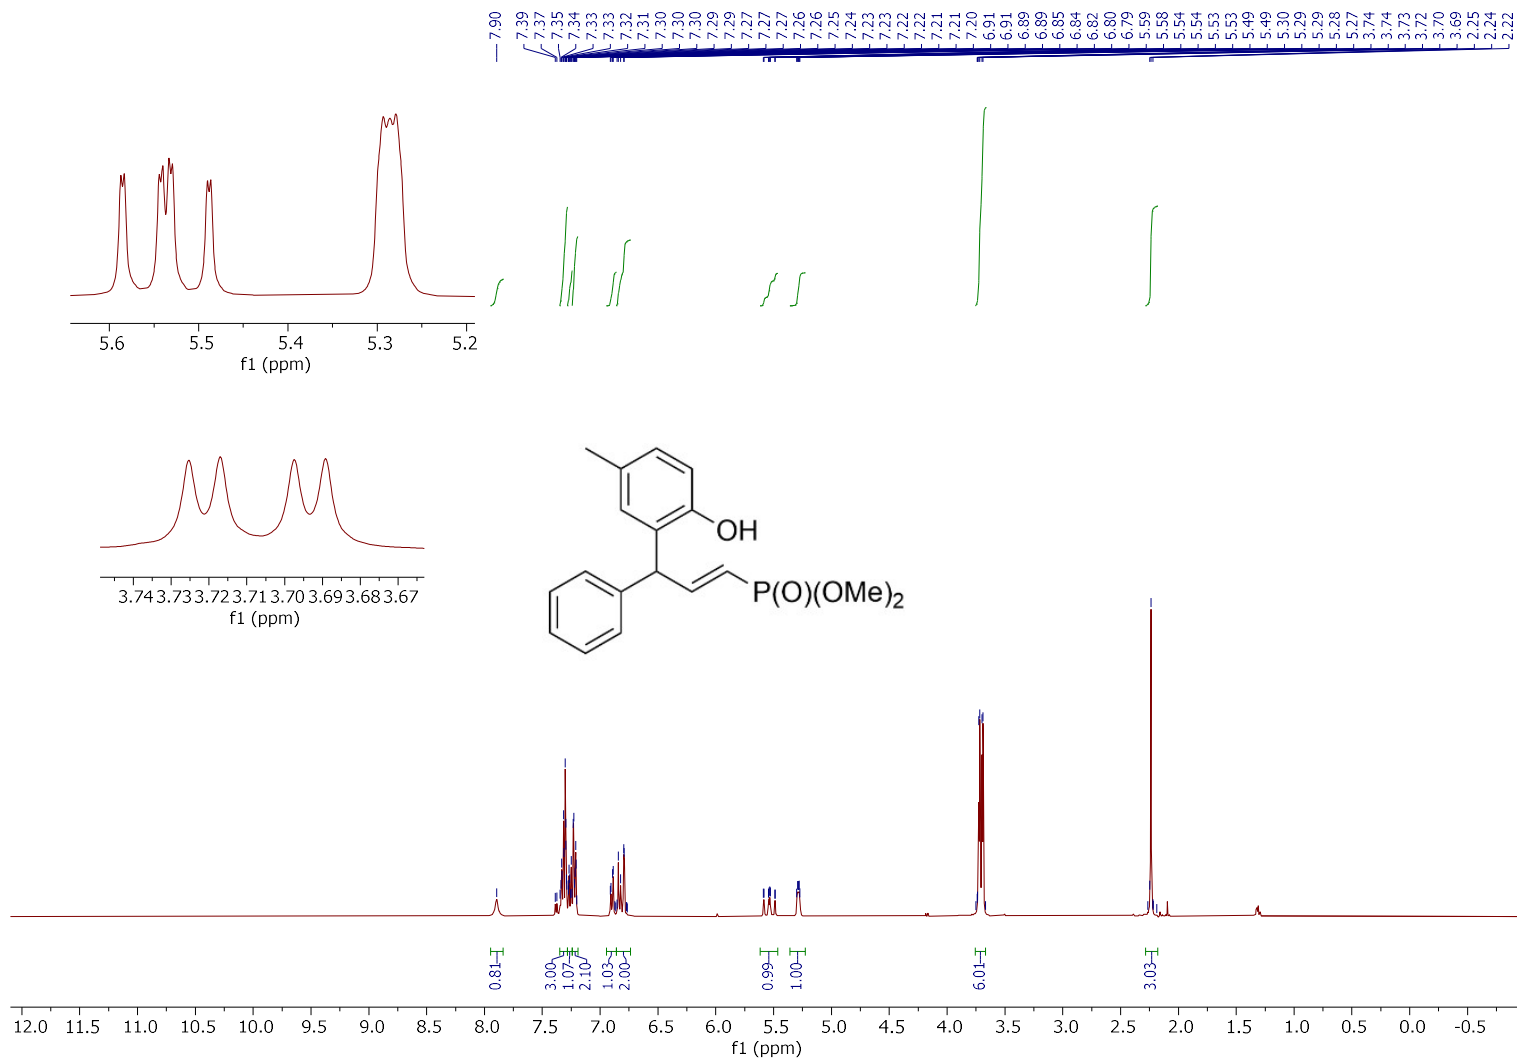

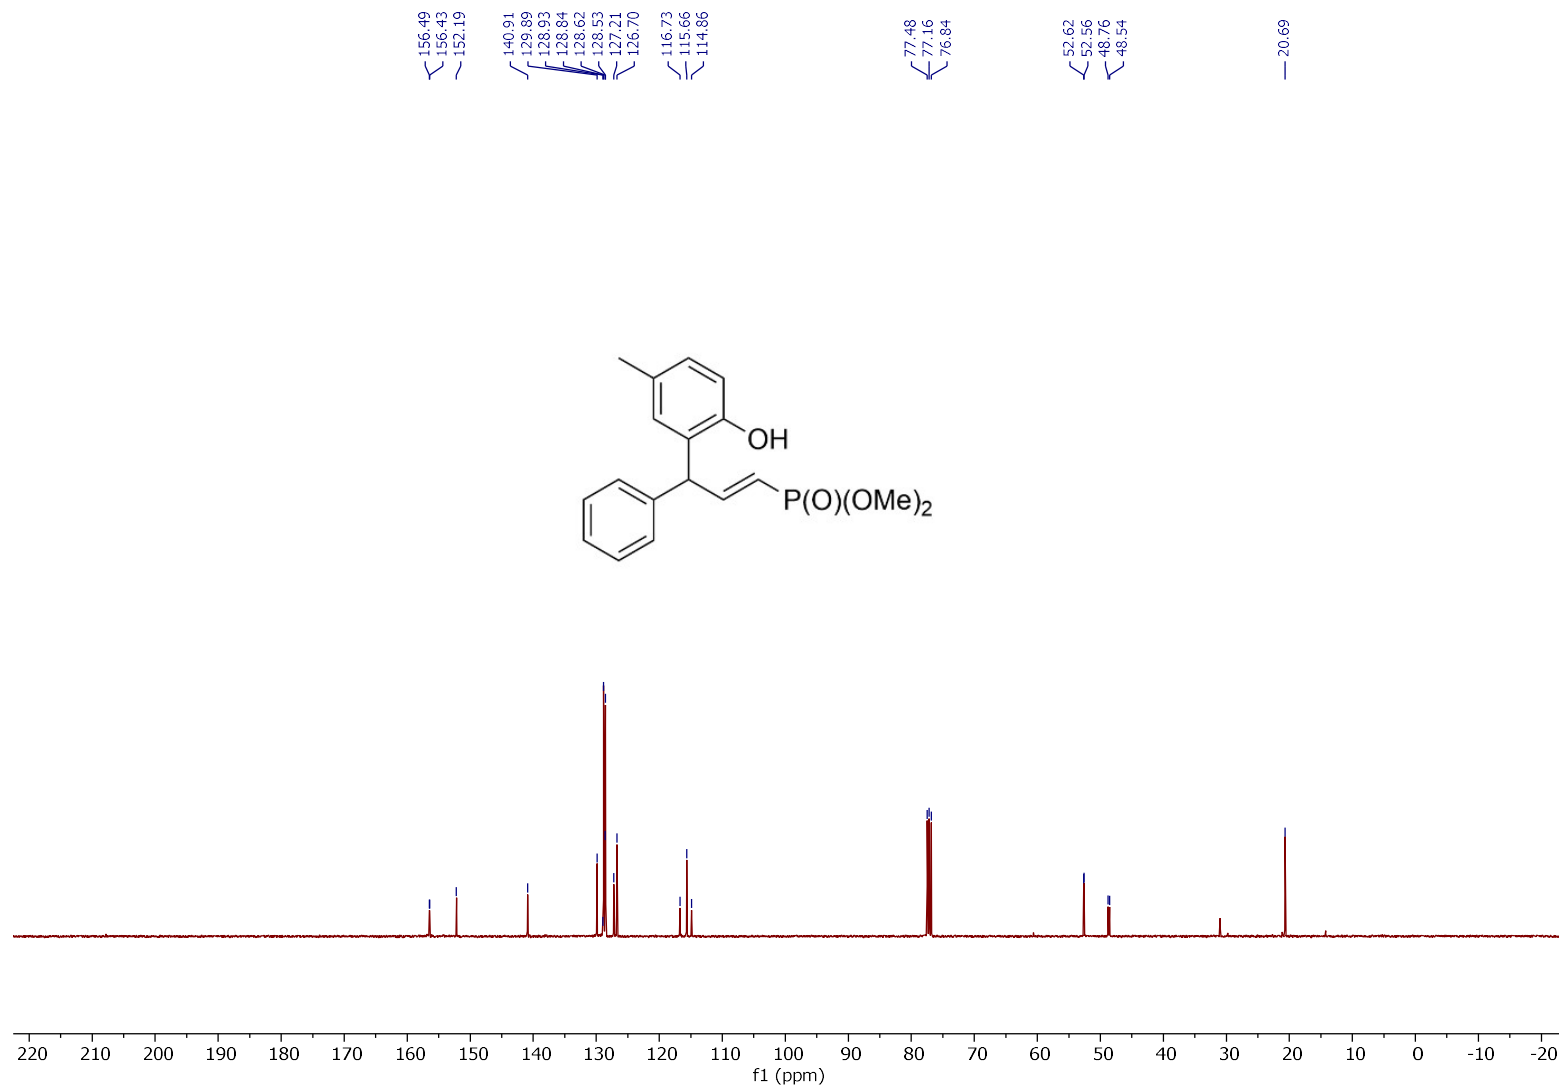

Figure S35:  $^{13}\text{C}\{^1\text{H}\}$  NMR Spectra of 3d in  $\text{CDCl}_3$

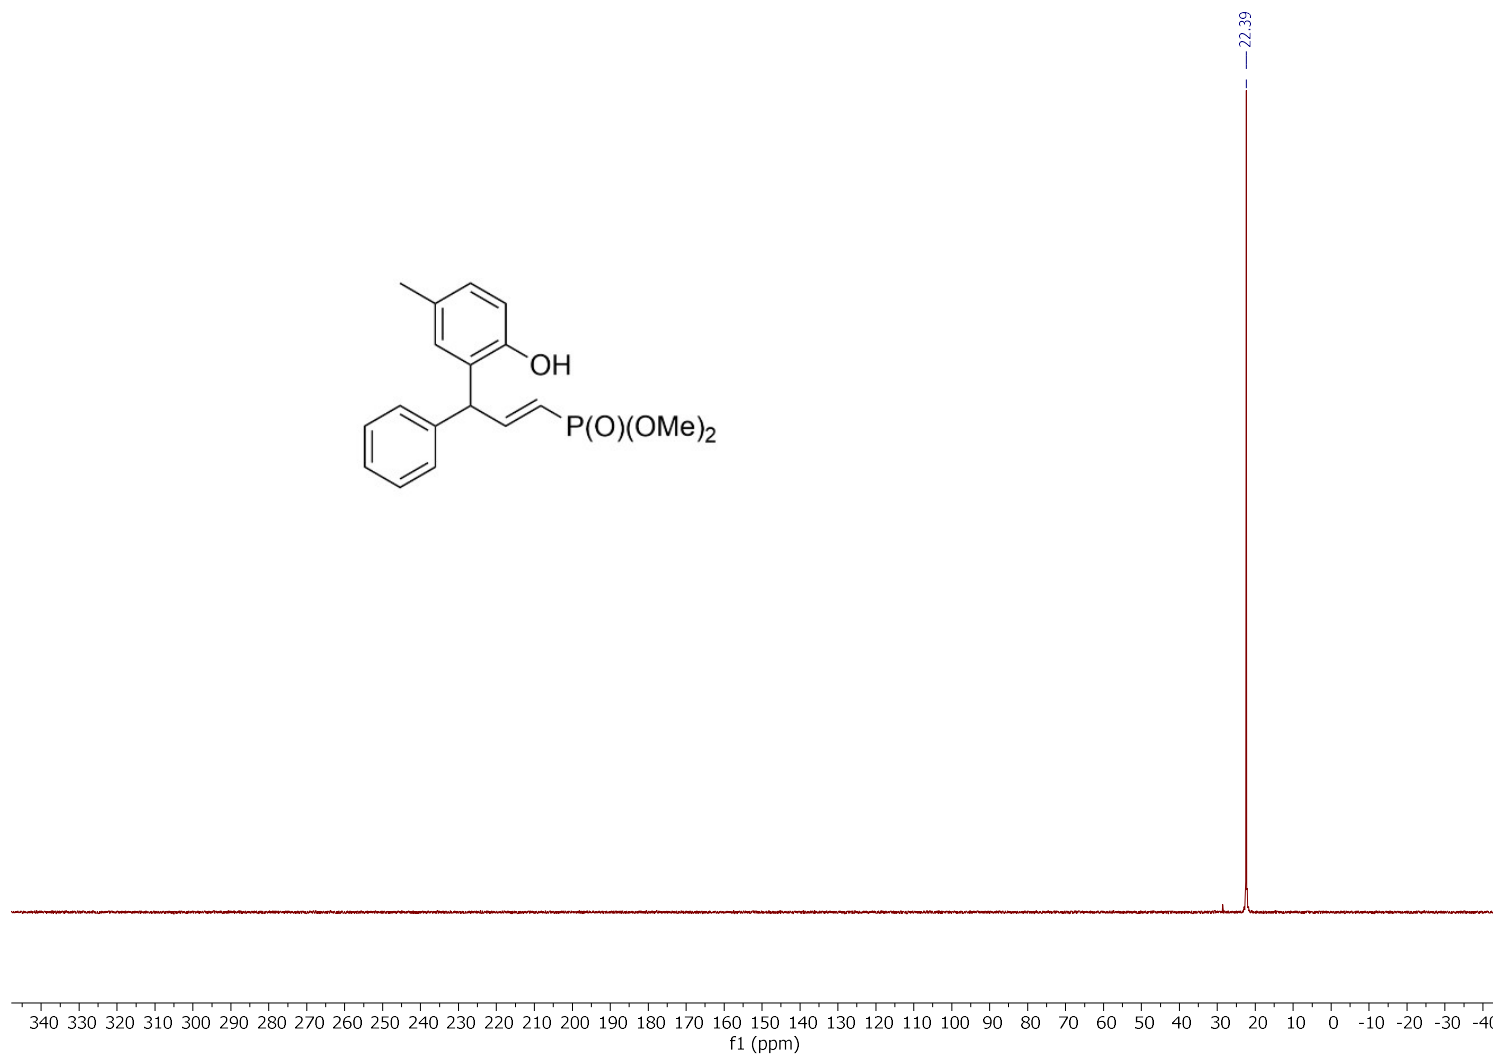

Figure S36:  $^{31}\text{P}\{^1\text{H}\}$  NMR Spectra of 3d in  $\text{CDCl}_3$

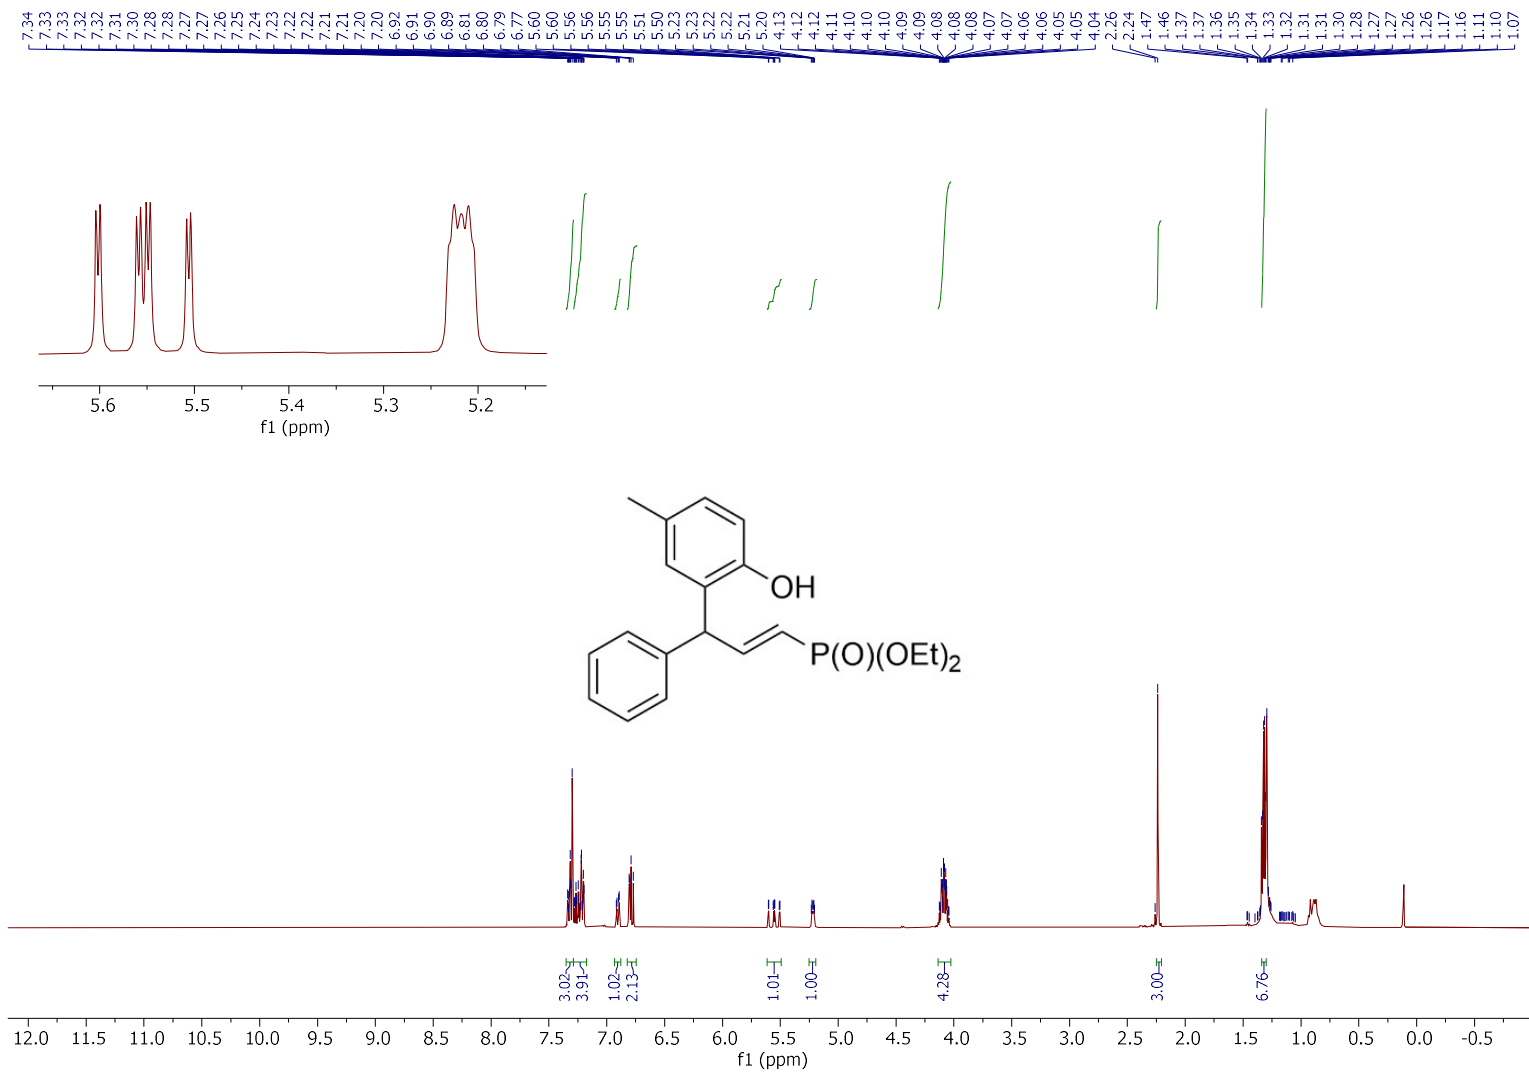

Figure S37: <sup>1</sup>H NMR Spectra of 3b in CDCl<sub>3</sub>

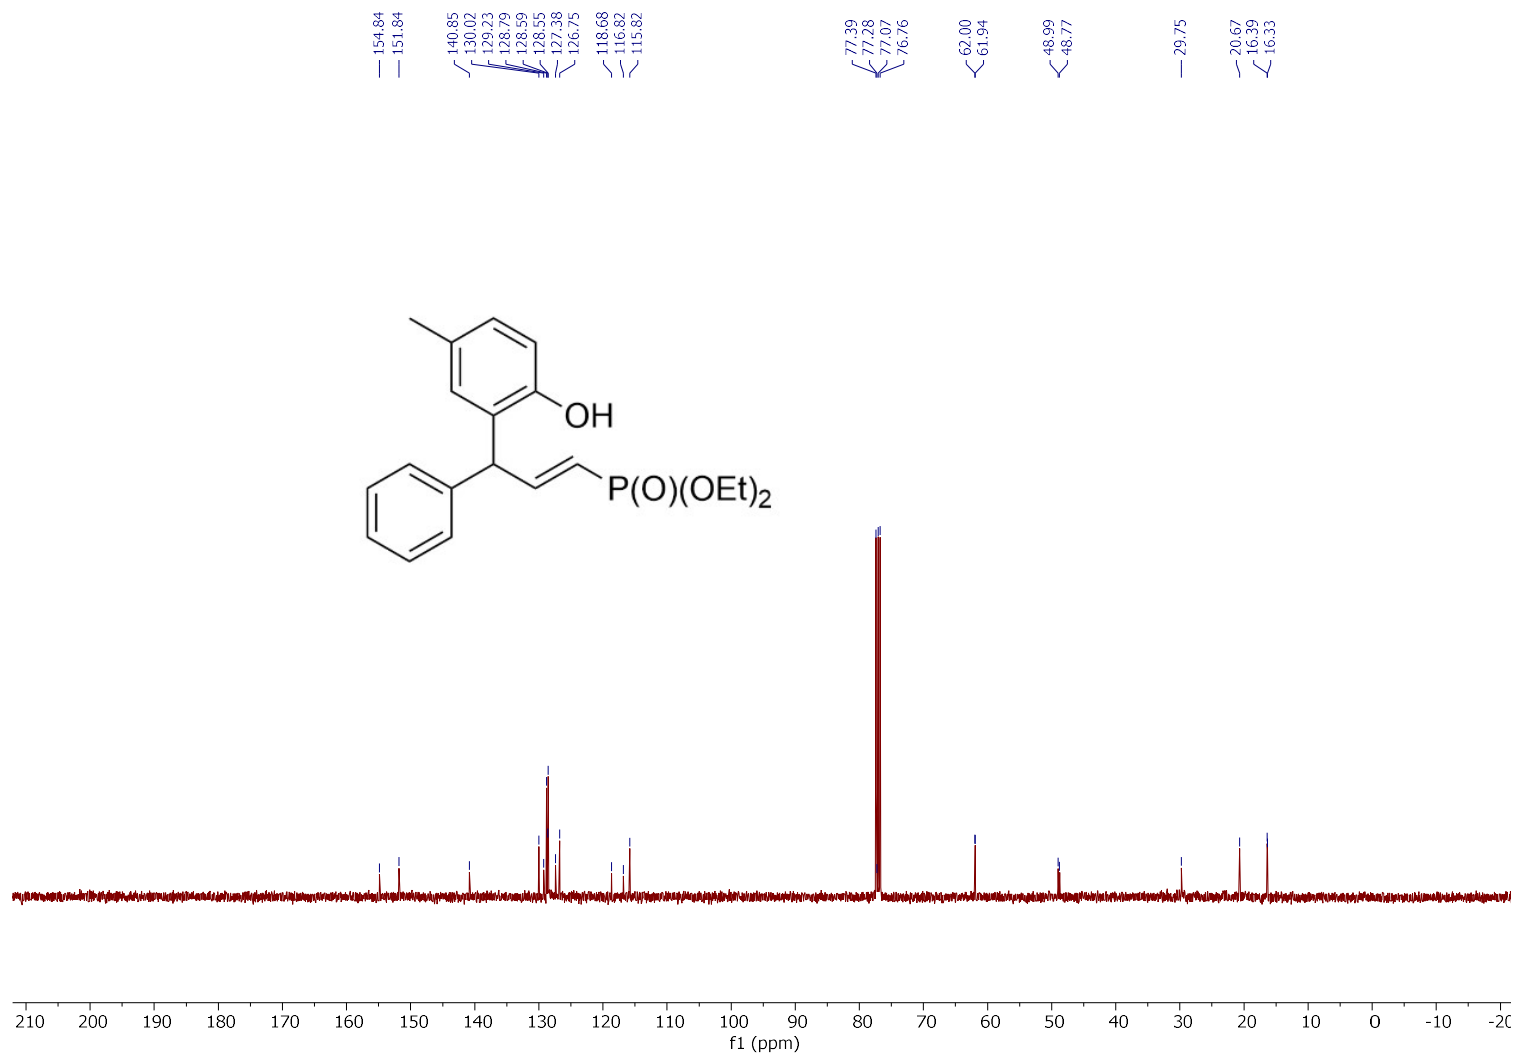

Figure S38:  $^{13}\text{C}\{^1\text{H}\}$  NMR Spectra of 3b in  $\text{CDCl}_3$

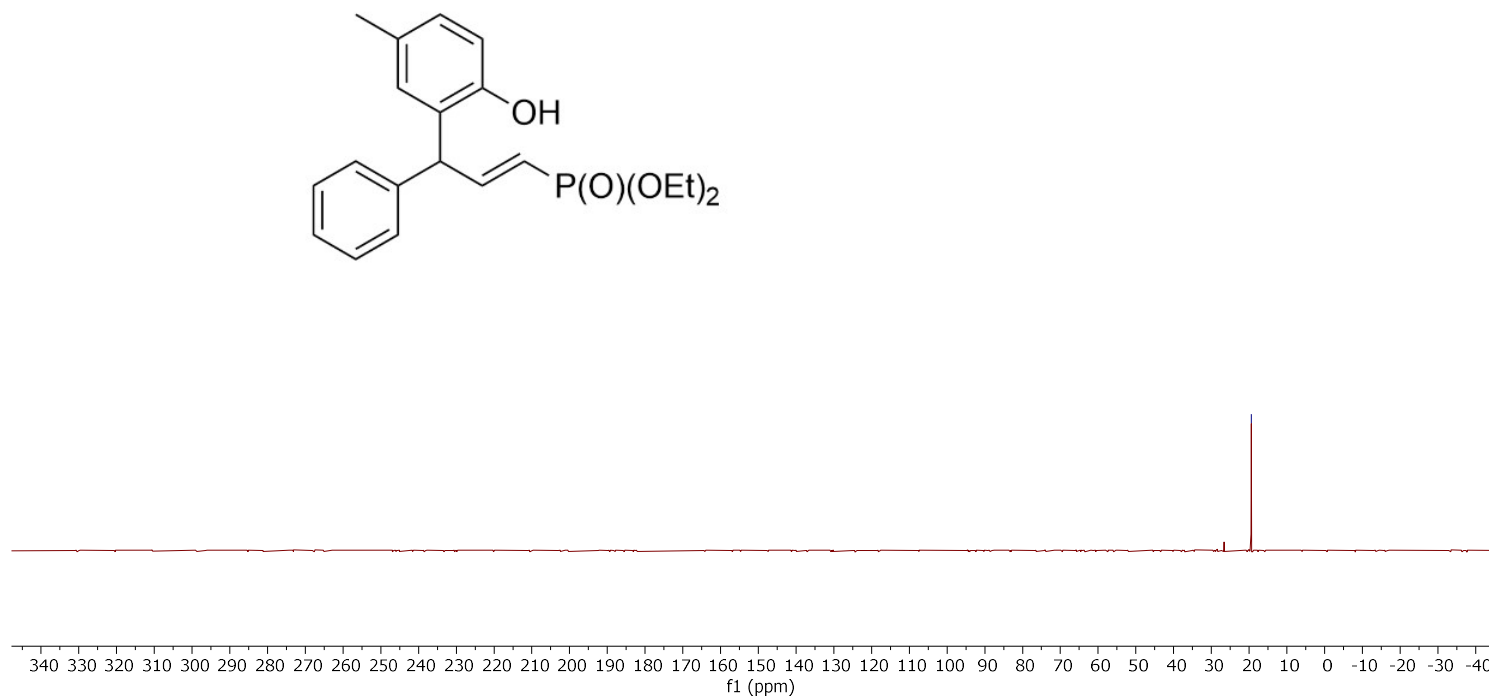

Figure S39:  $^{31}\text{P}\{^1\text{H}\}$  NMR Spectra of 3b in  $\text{CDCl}_3$

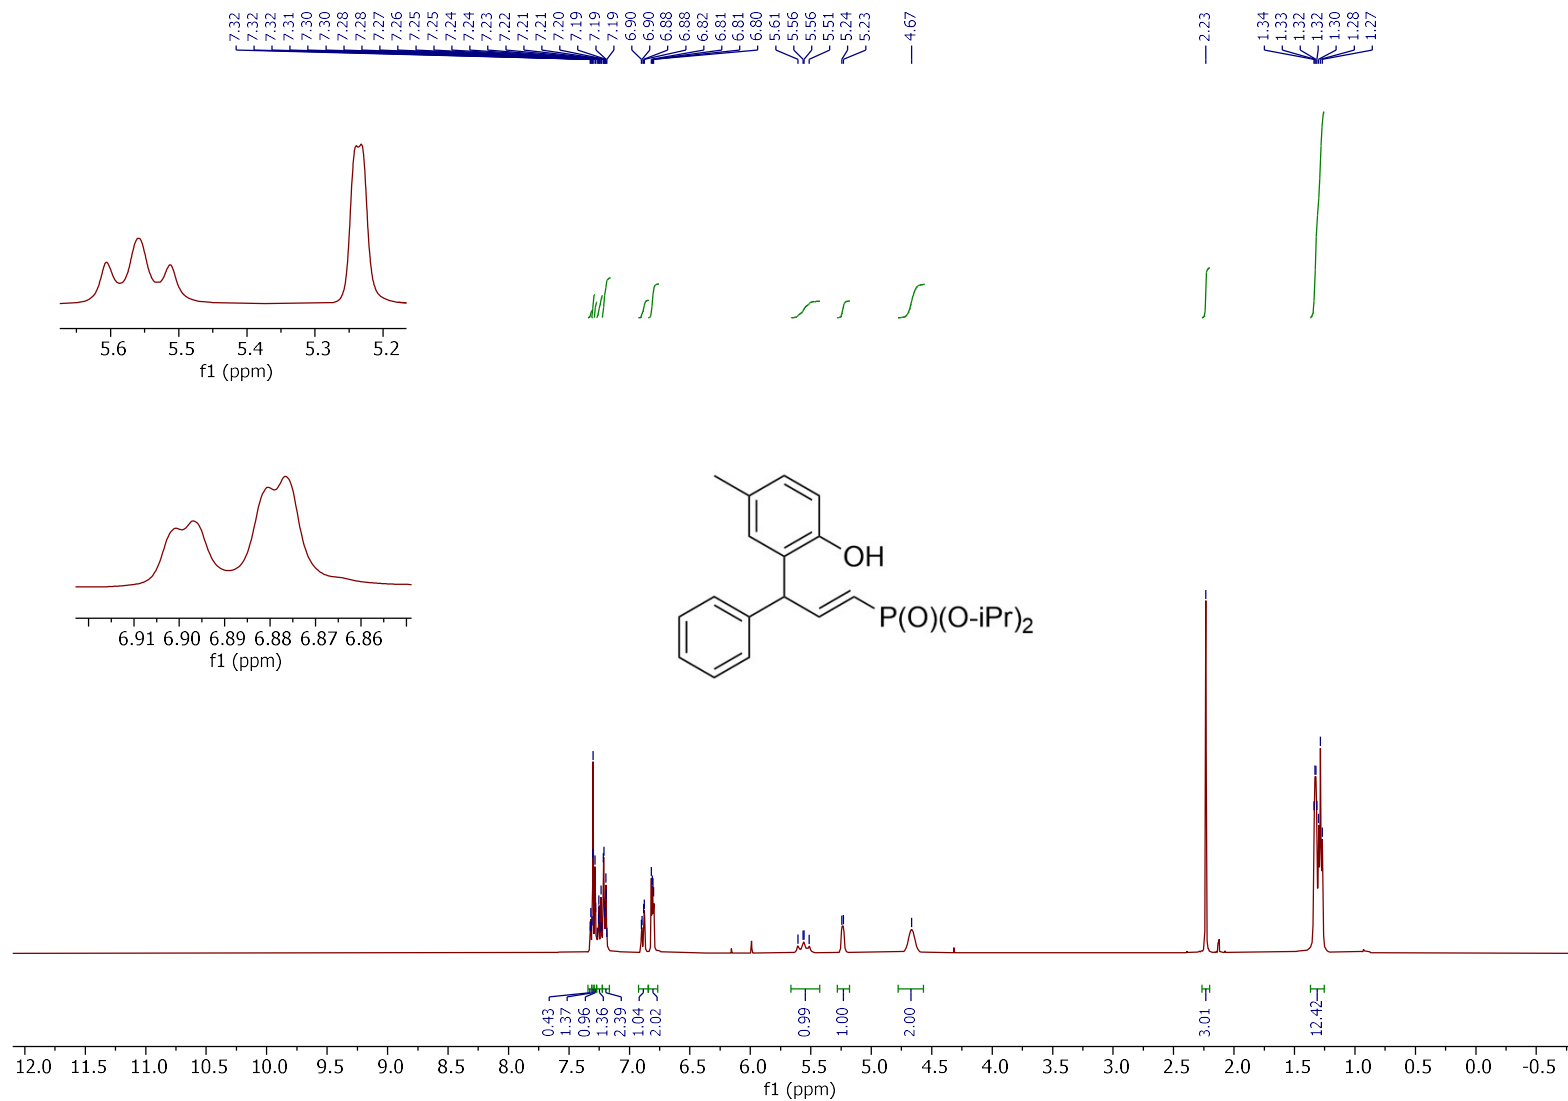

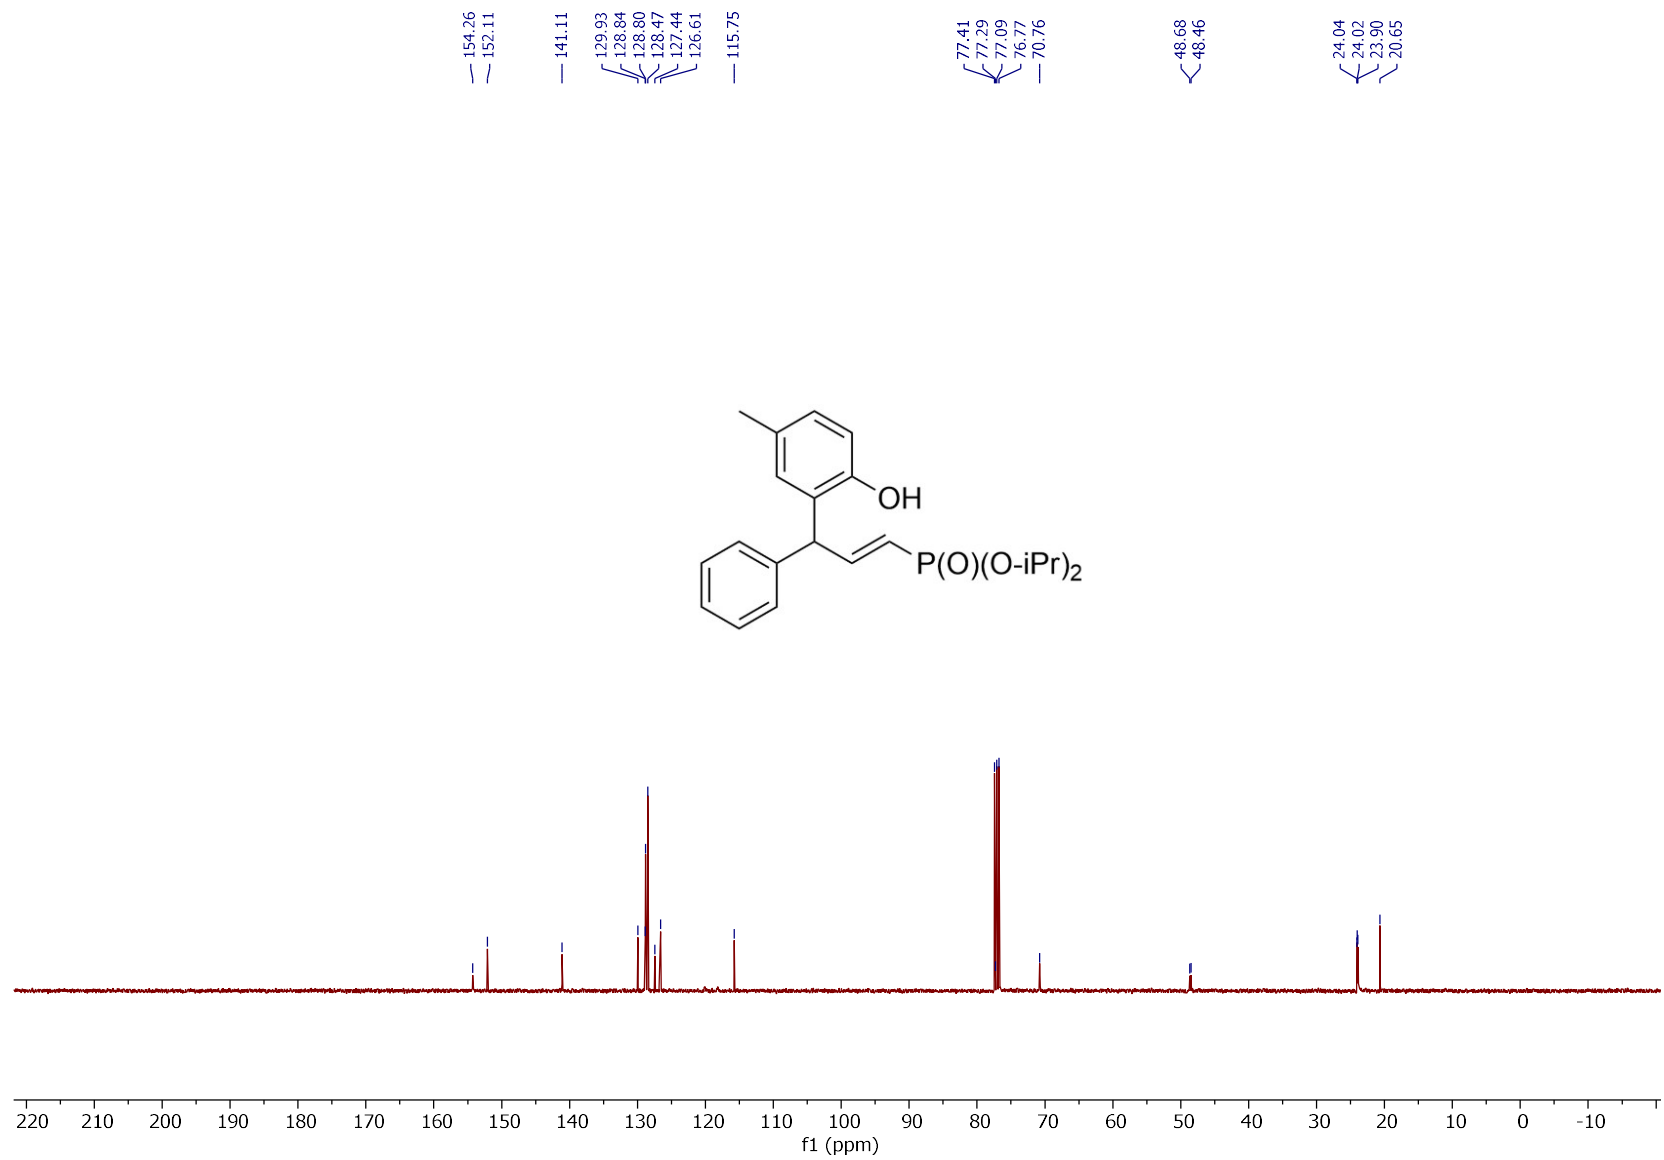

Figure S41:  $^{13}\text{C}\{^1\text{H}\}$  NMR Spectra of 3e in  $\text{CDCl}_3$

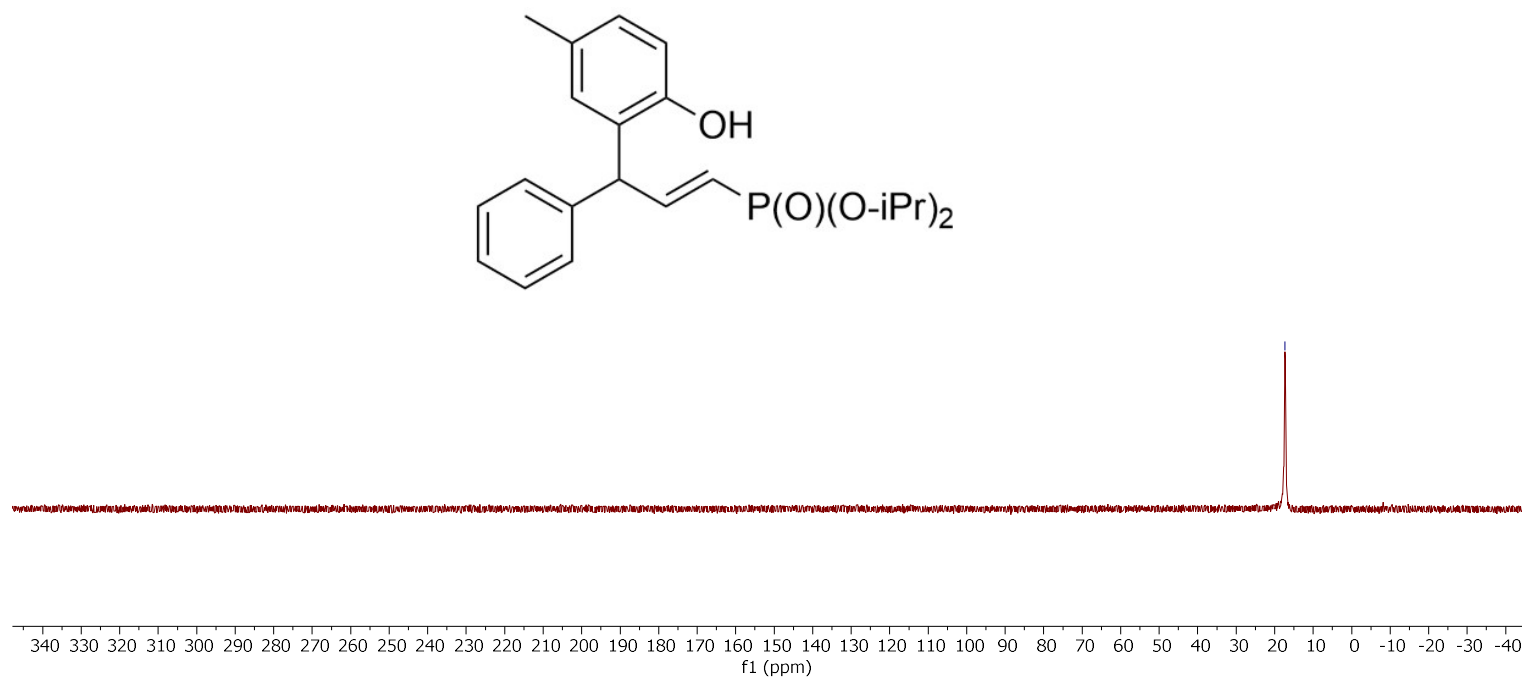

Figure S42:  $^{31}\text{P}\{^1\text{H}\}$  NMR Spectra of 3e in  $\text{CDCl}_3$

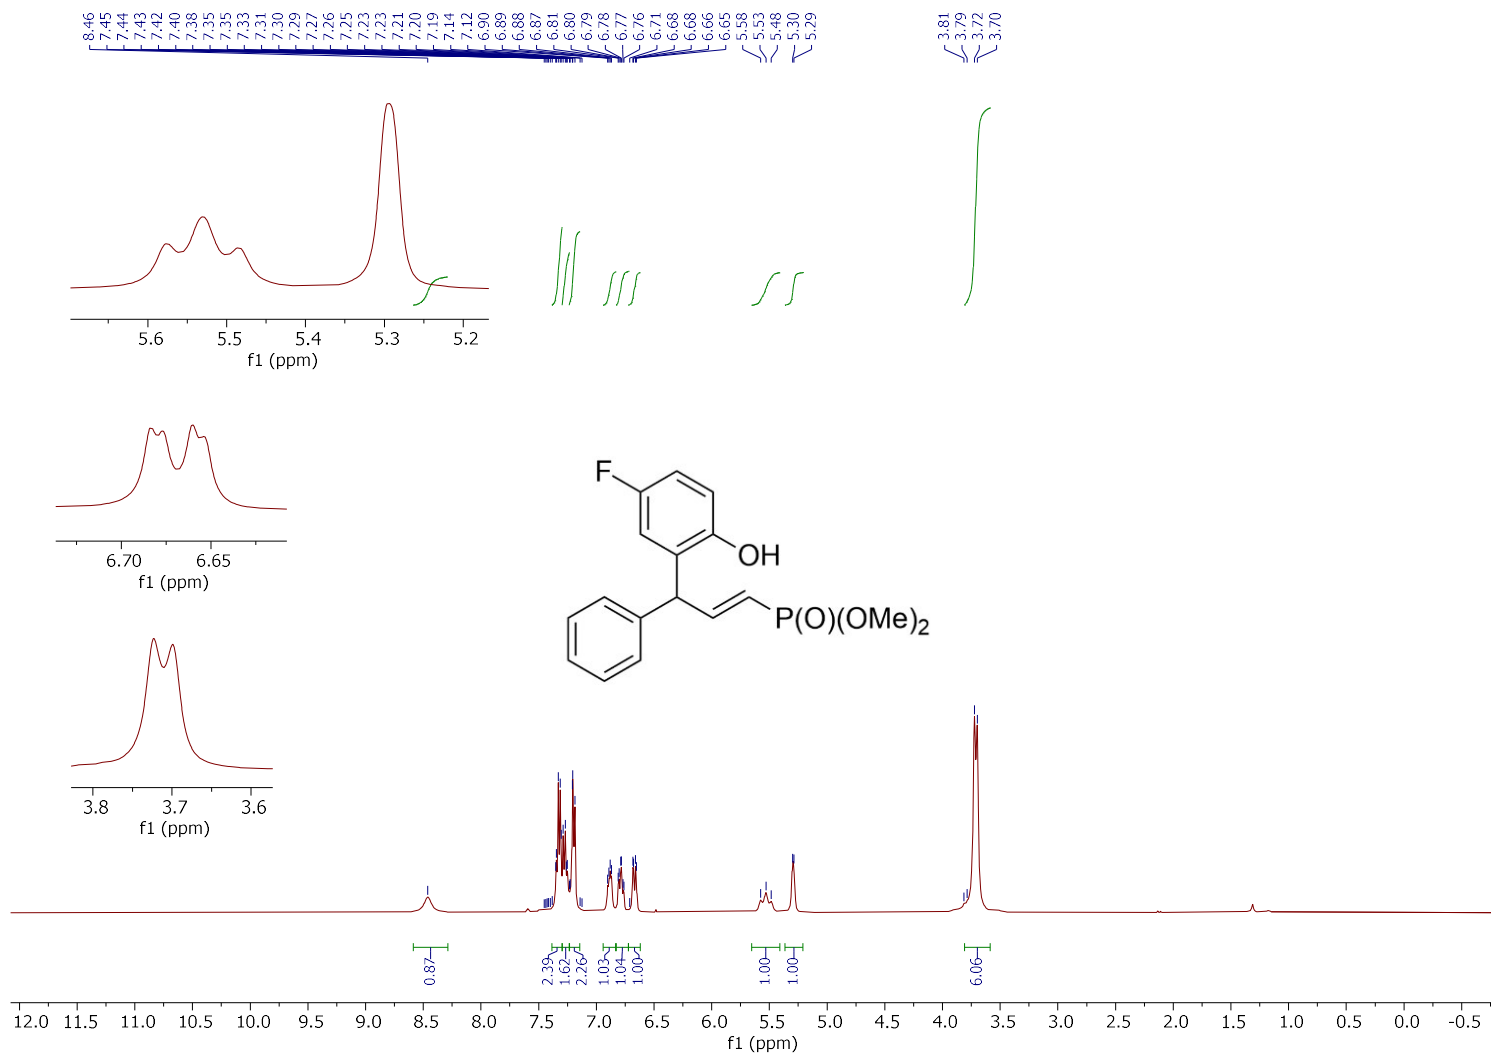

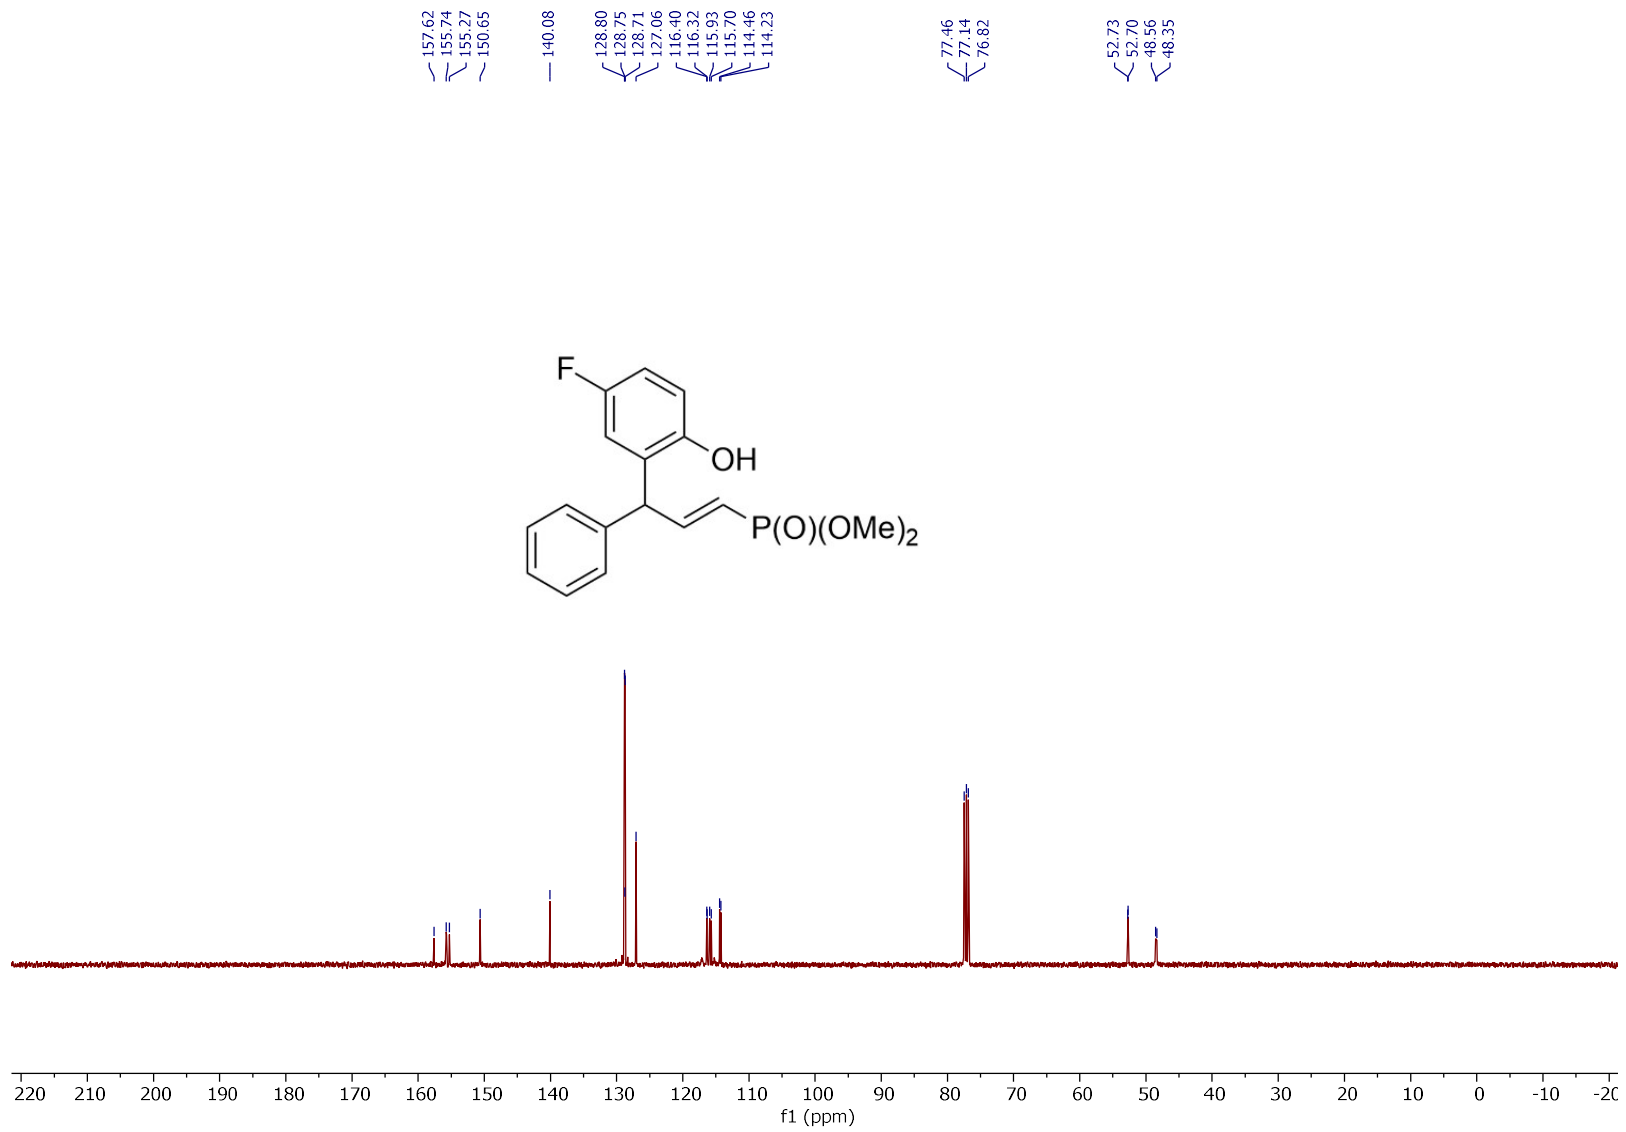

Figure S44:  $^{13}\text{C}\{^1\text{H}\}$  NMR Spectra of 3g in  $\text{CDCl}_3$

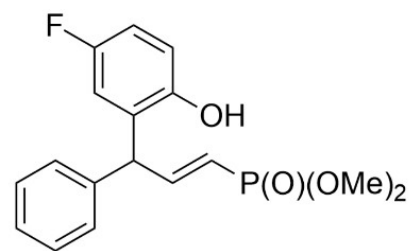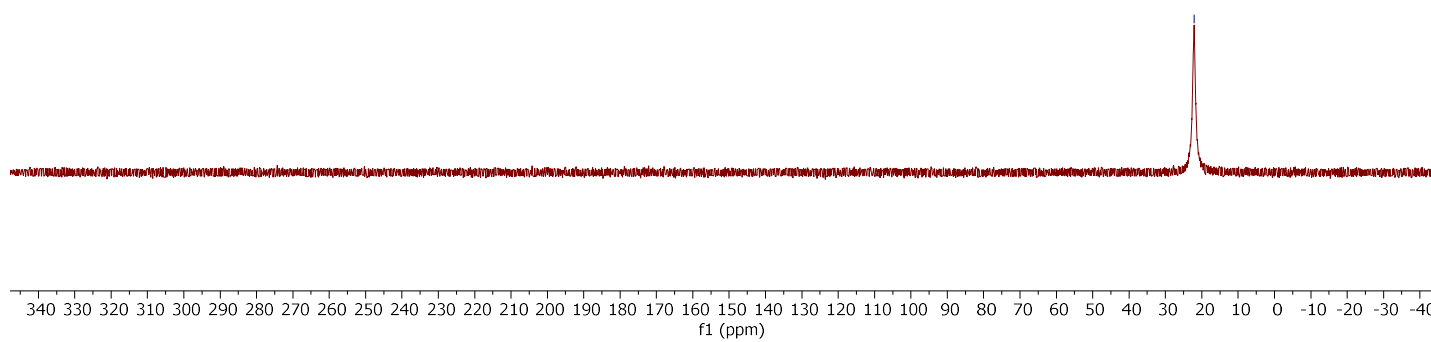

Figure S45: <sup>31</sup>P{<sup>1</sup>H} NMR Spectra of 3g in CDCl<sub>3</sub>

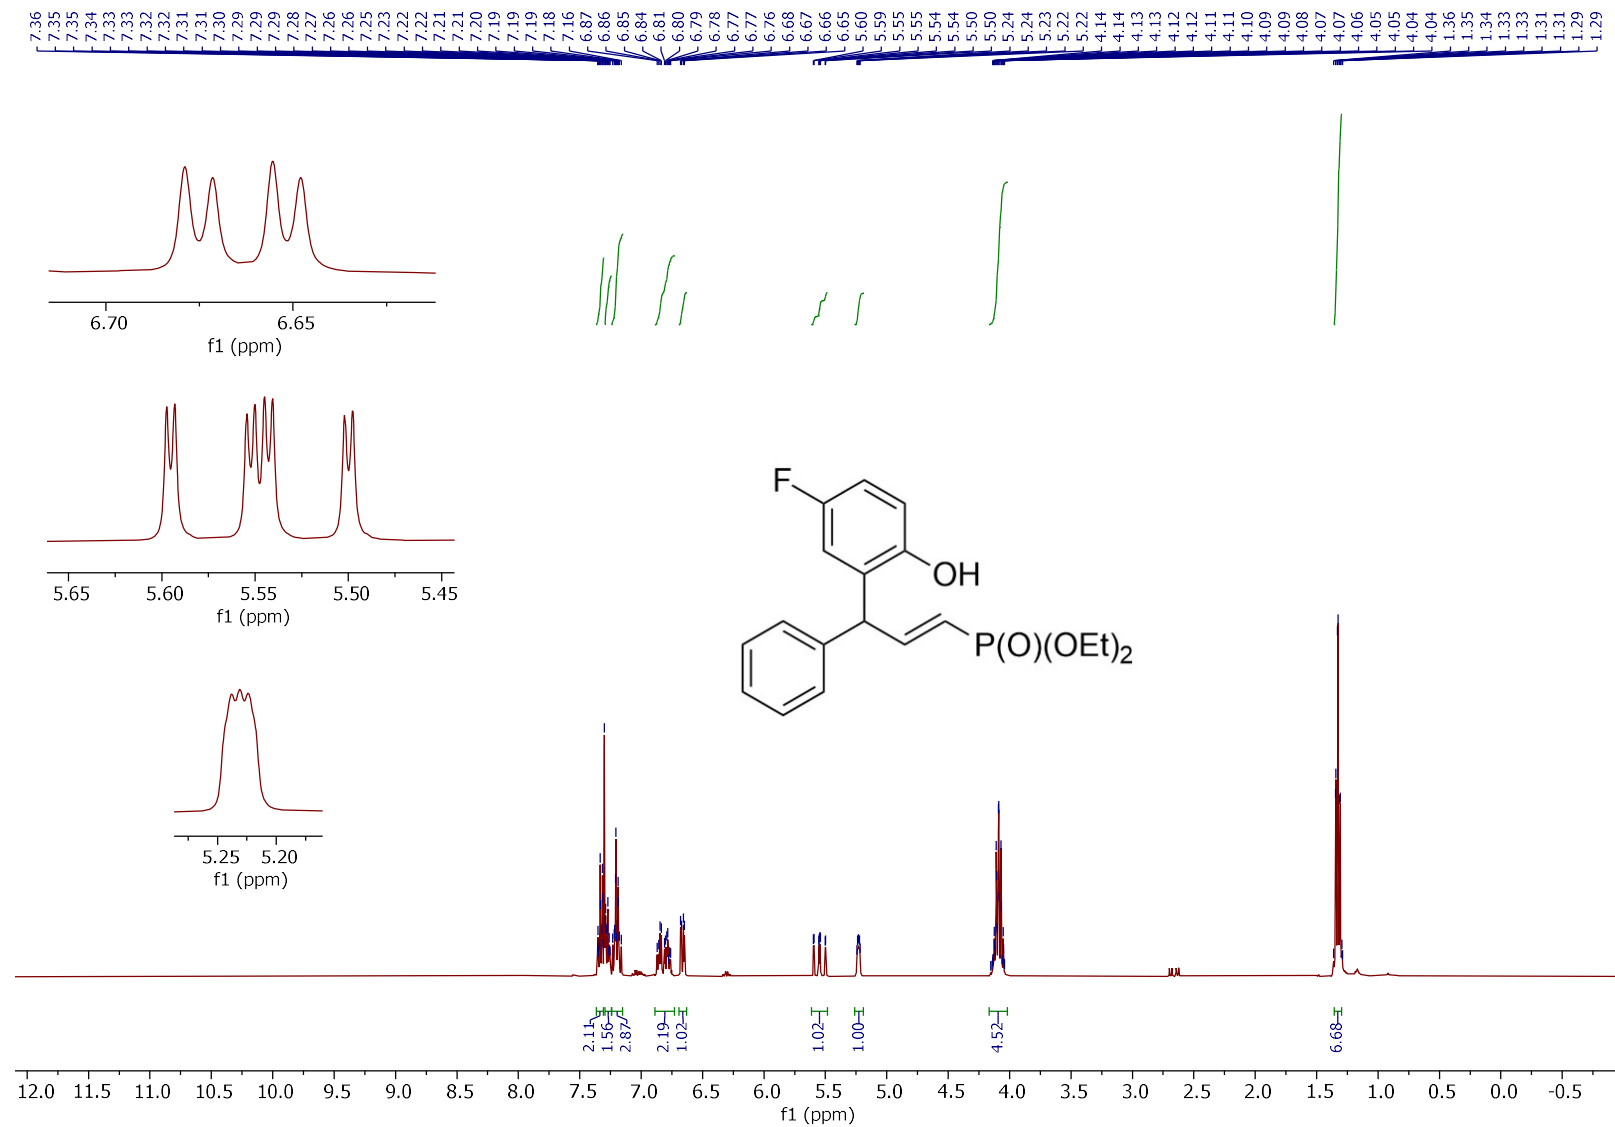

Figure S46: <sup>1</sup>H NMR Spectra of 3c in CDCl<sub>3</sub>

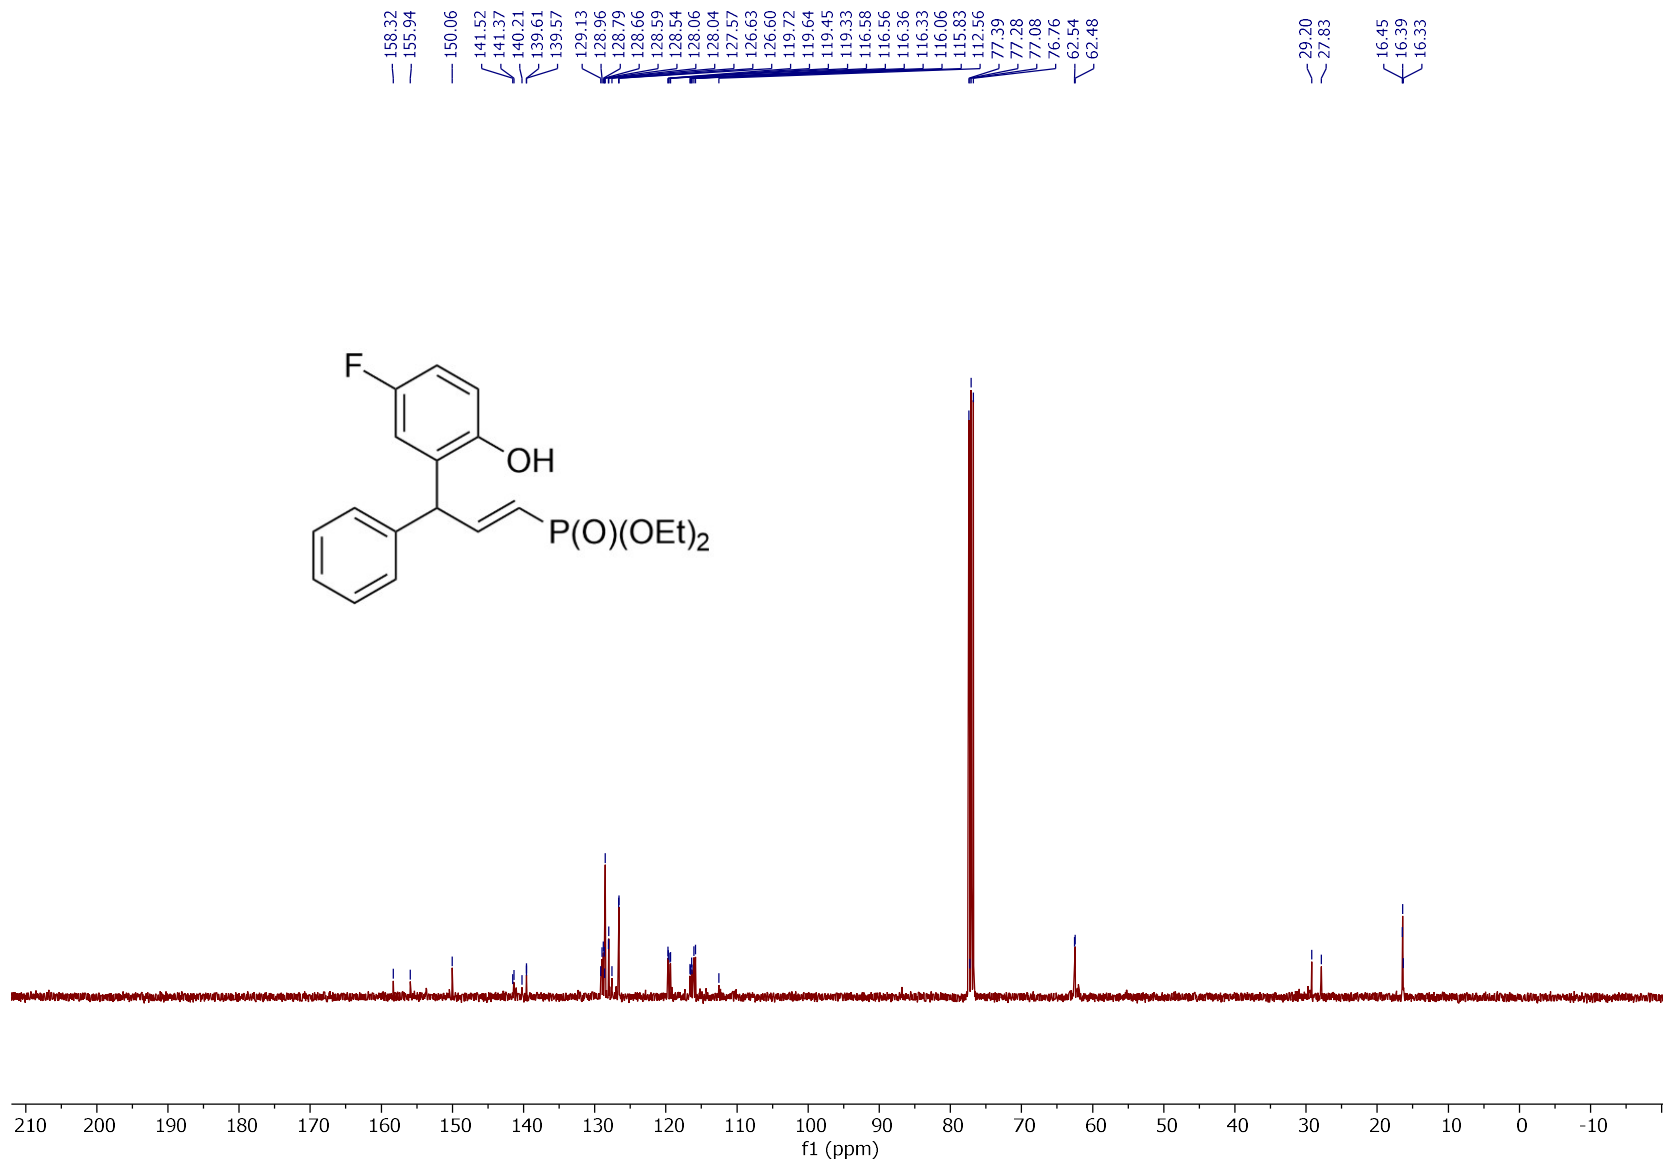

Figure S47:  $^{13}\text{C}\{^1\text{H}\}$  NMR Spectra of 3c in  $\text{CDCl}_3$



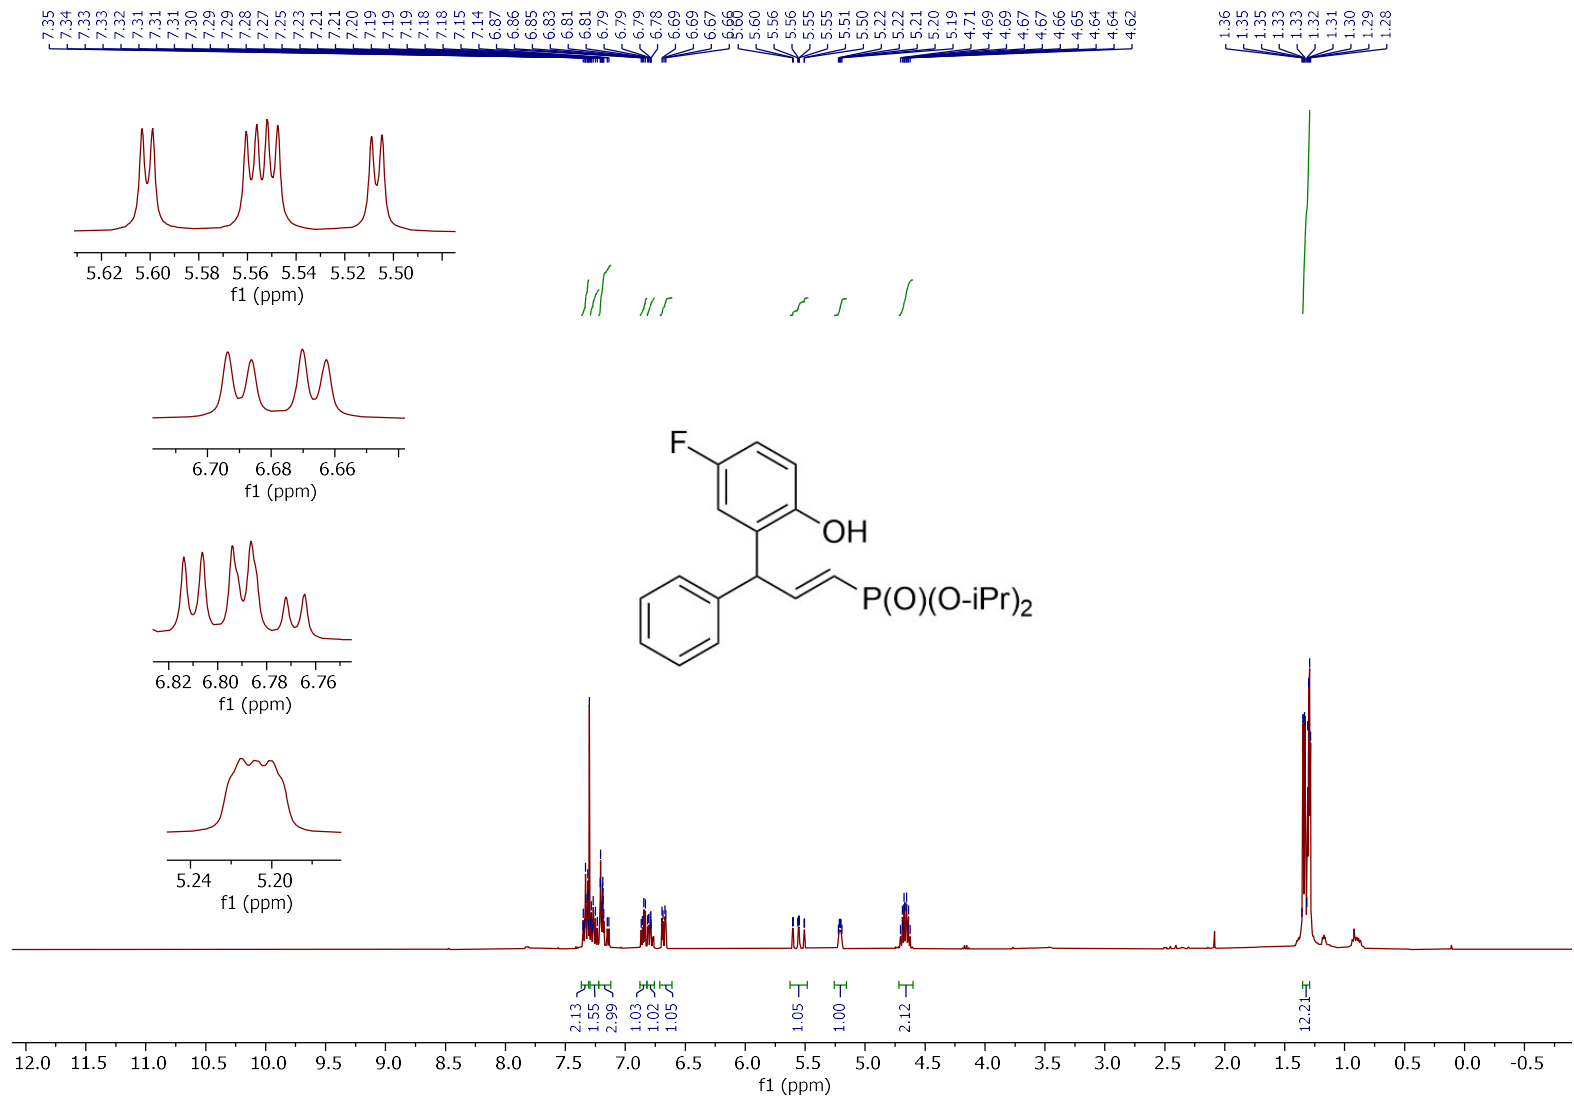

Figure S49: <sup>1</sup>H NMR Spectra of 3h in CDCl<sub>3</sub>

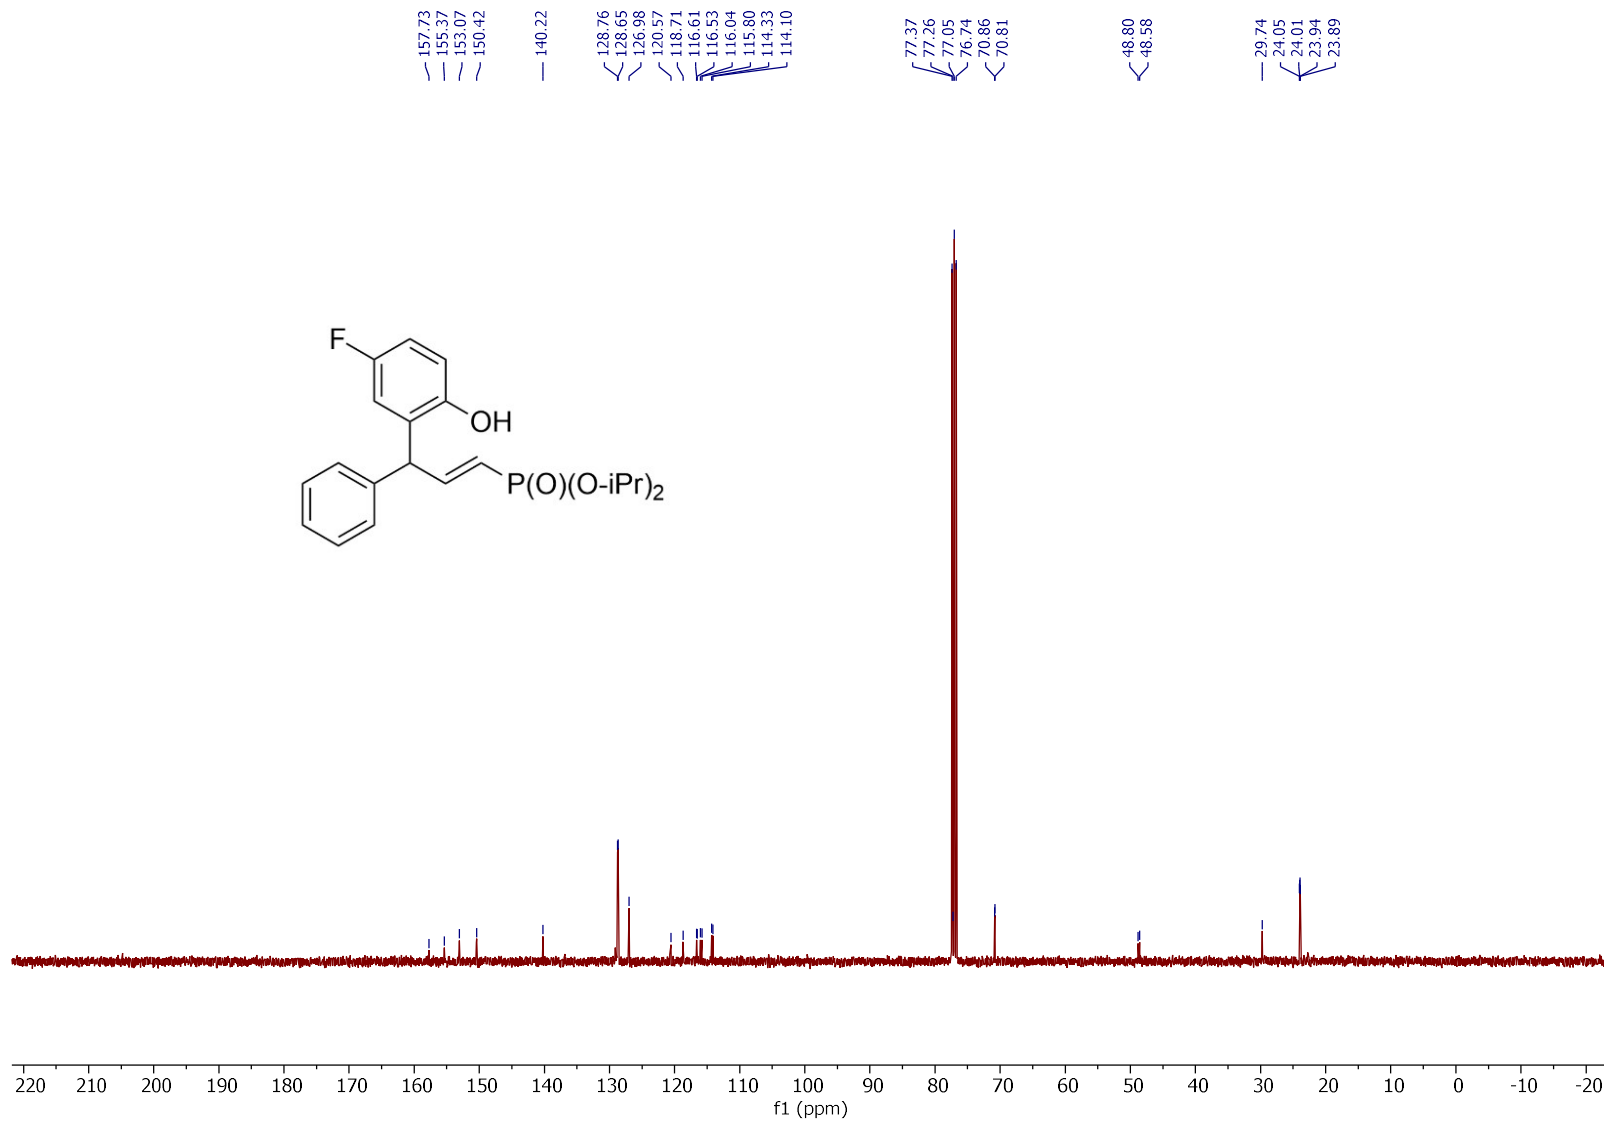

Figure S50:  $^{13}\text{C}\{^1\text{H}\}$  NMR Spectra of 3h in  $\text{CDCl}_3$

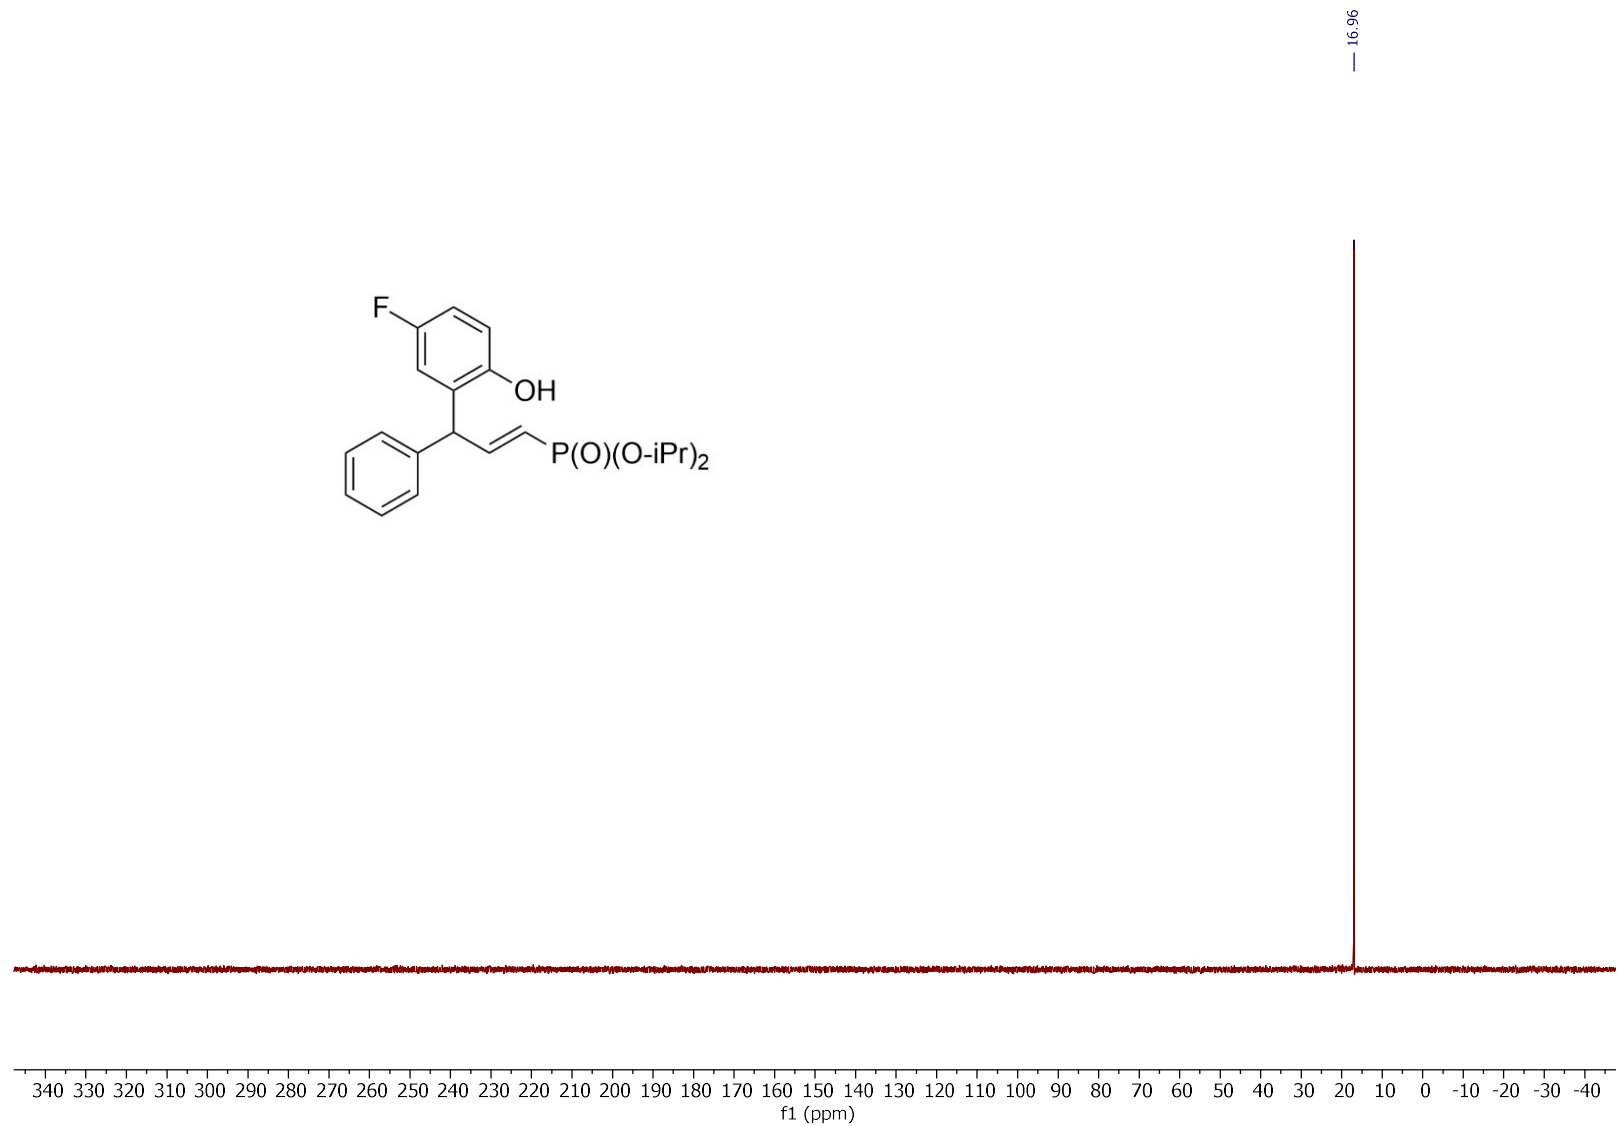

Figure S51:  $^{31}\text{P}\{^1\text{H}\}$  NMR Spectra of 3h in  $\text{CDCl}_3$

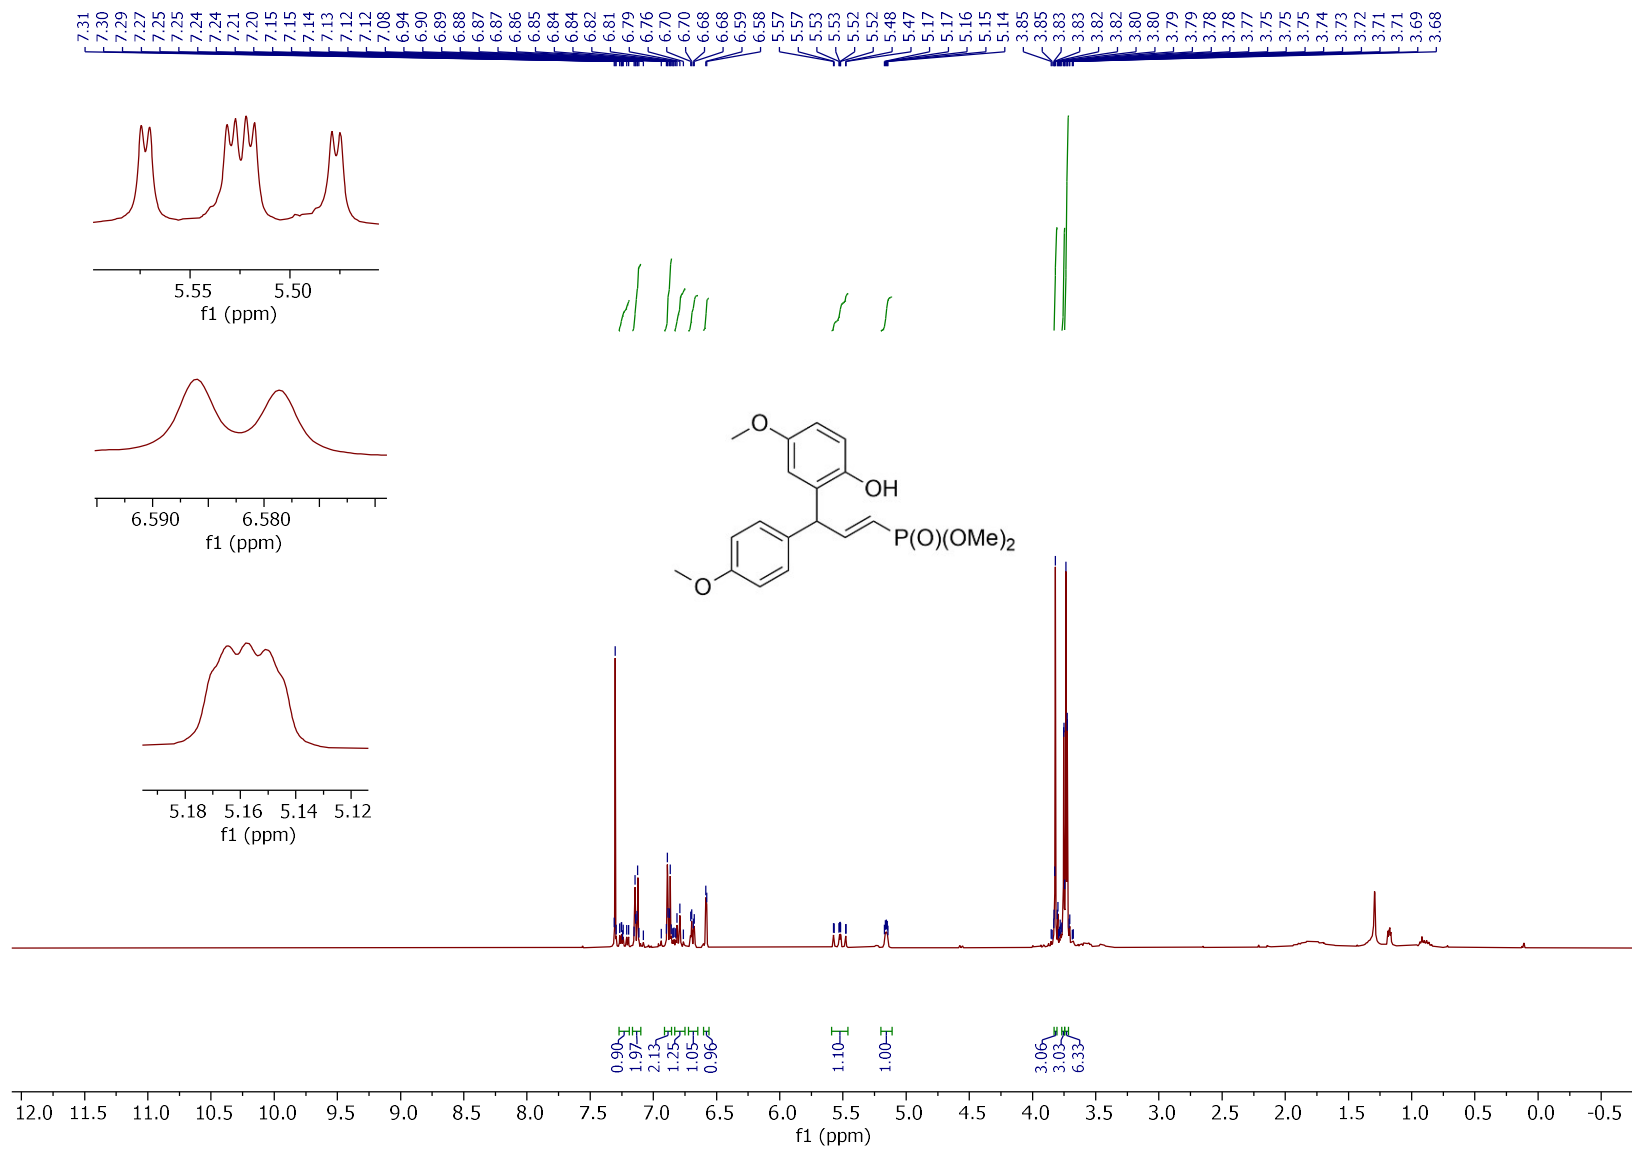

Figure S52:  $^1\text{H}$  NMR Spectra of 3l in  $\text{CDCl}_3$

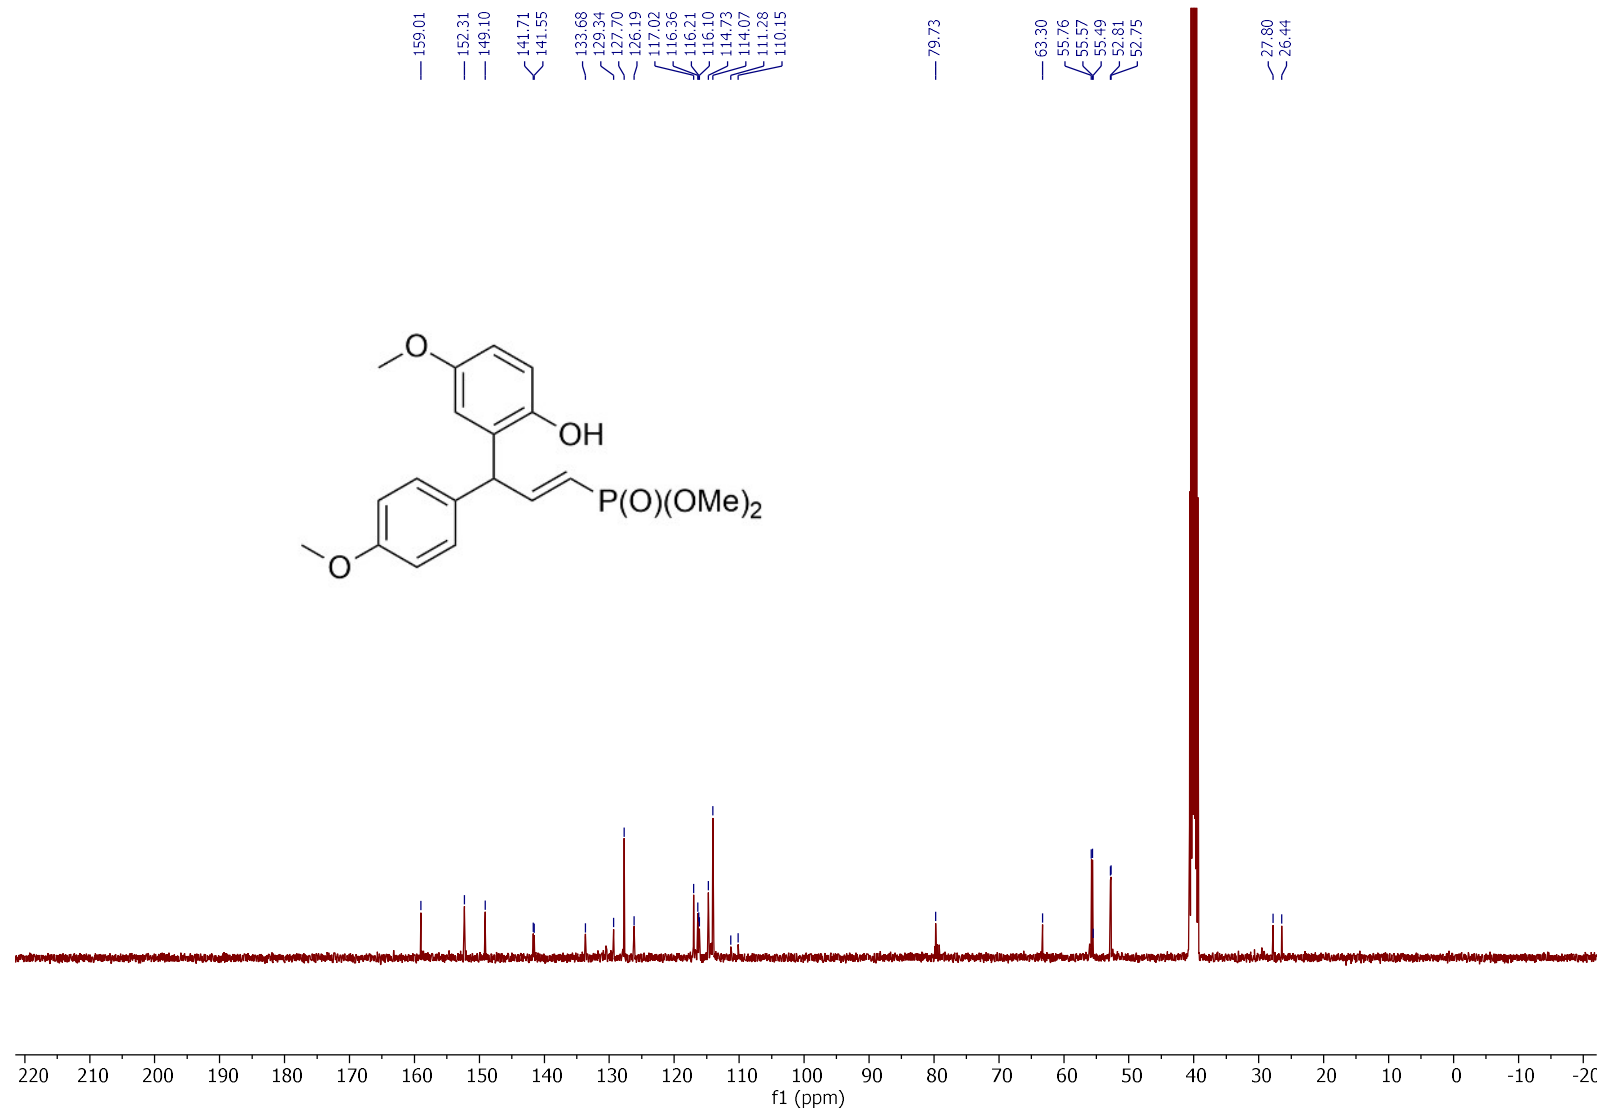

Figure S53:  $^{13}\text{C}\{^1\text{H}\}$  NMR Spectra of 3l in  $\text{CDCl}_3$

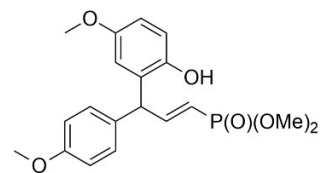

— 21.89

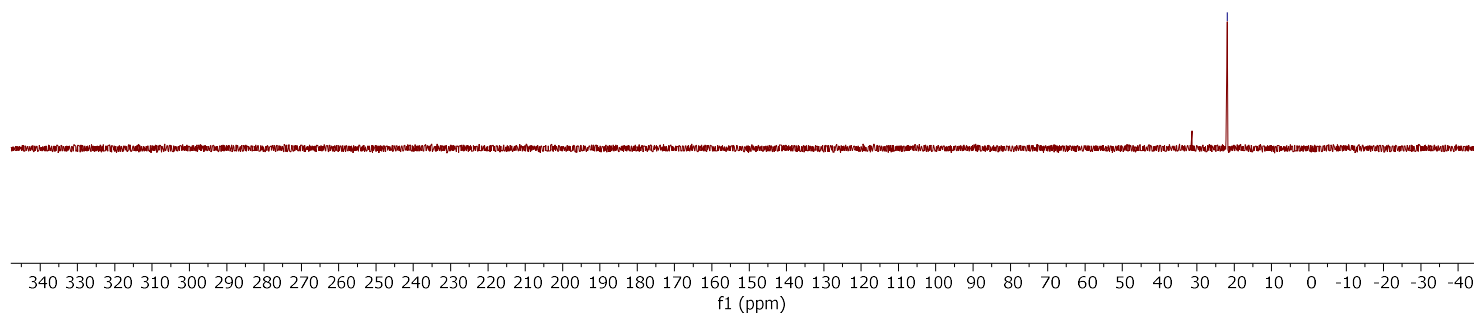

Figure S54:  $^{31}\text{P}\{^1\text{H}\}$  NMR Spectra of 3l in  $\text{CDCl}_3$

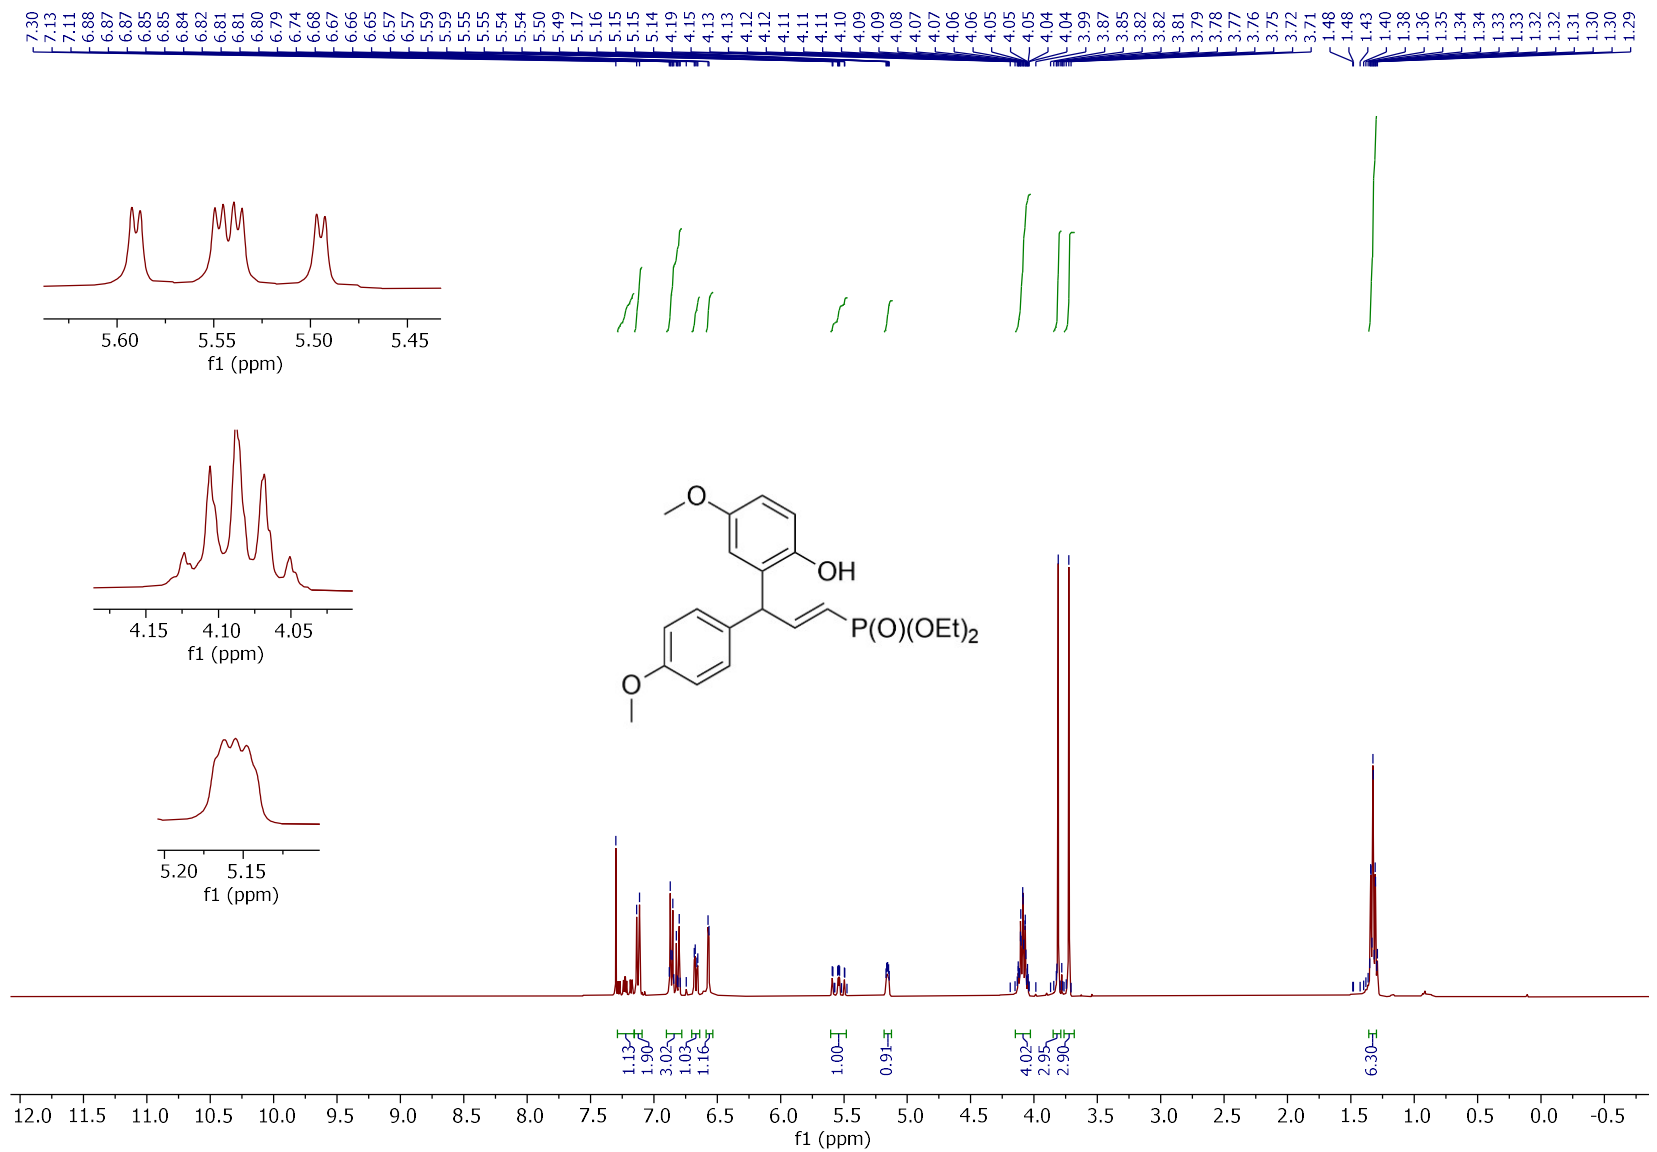

Figure S55:  $^1\text{H}$  NMR Spectra of 3m in  $\text{CDCl}_3$

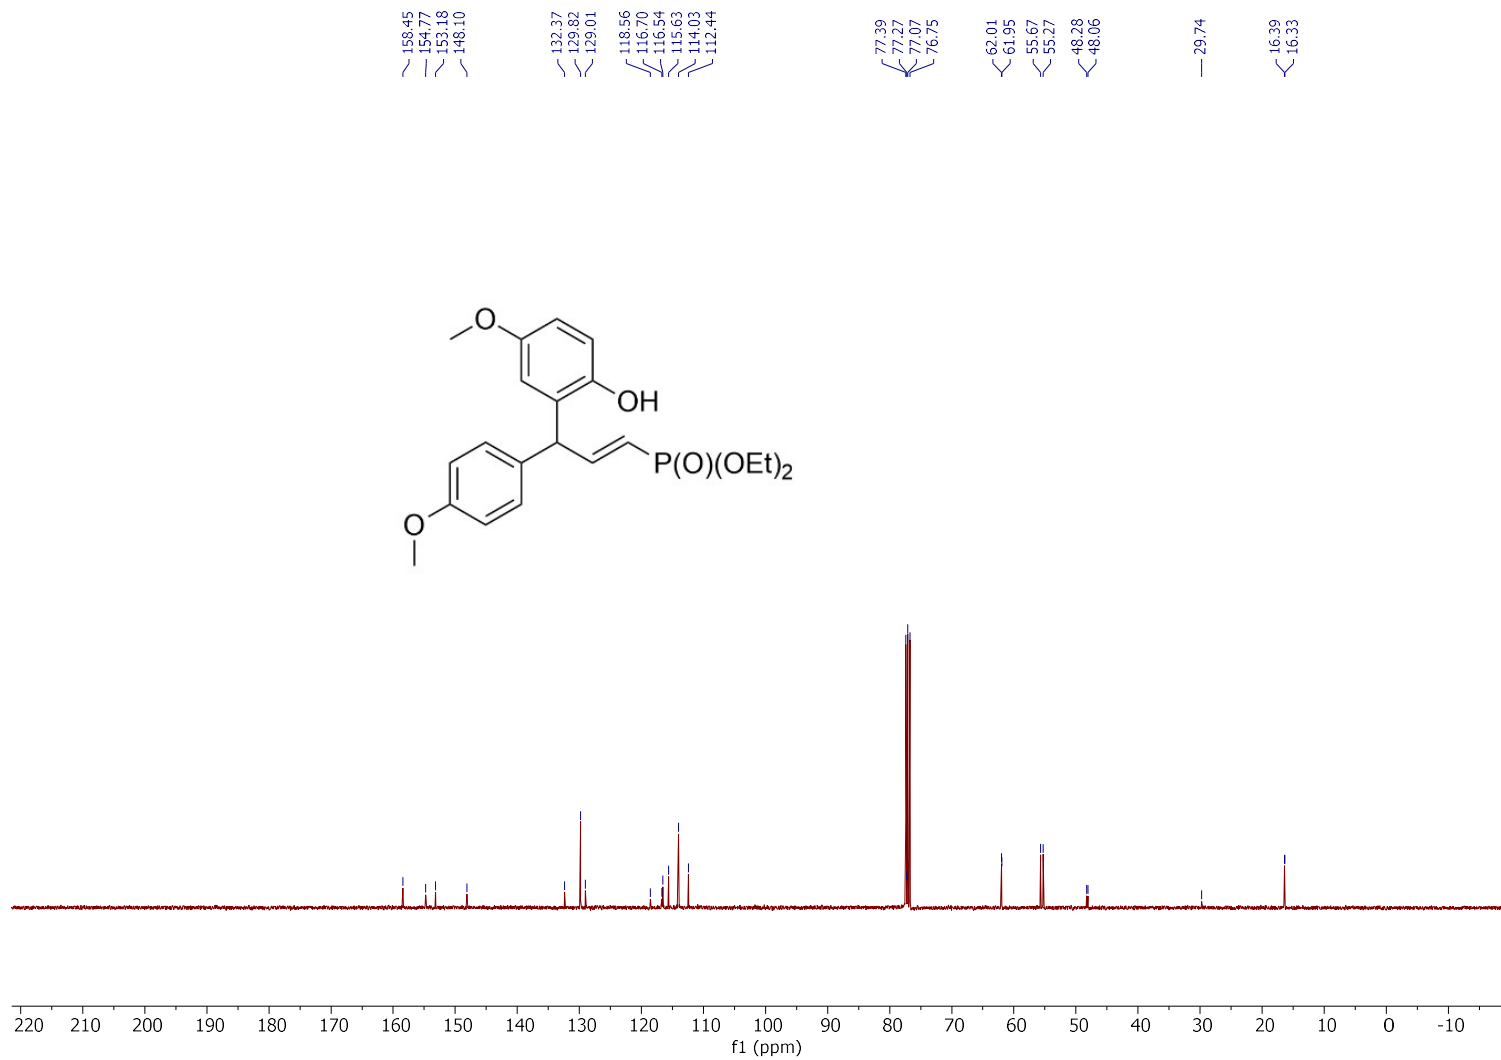

Figure S656:  $^{13}\text{C}\{^1\text{H}\}$  NMR Spectra of 3m in  $\text{CDCl}_3$

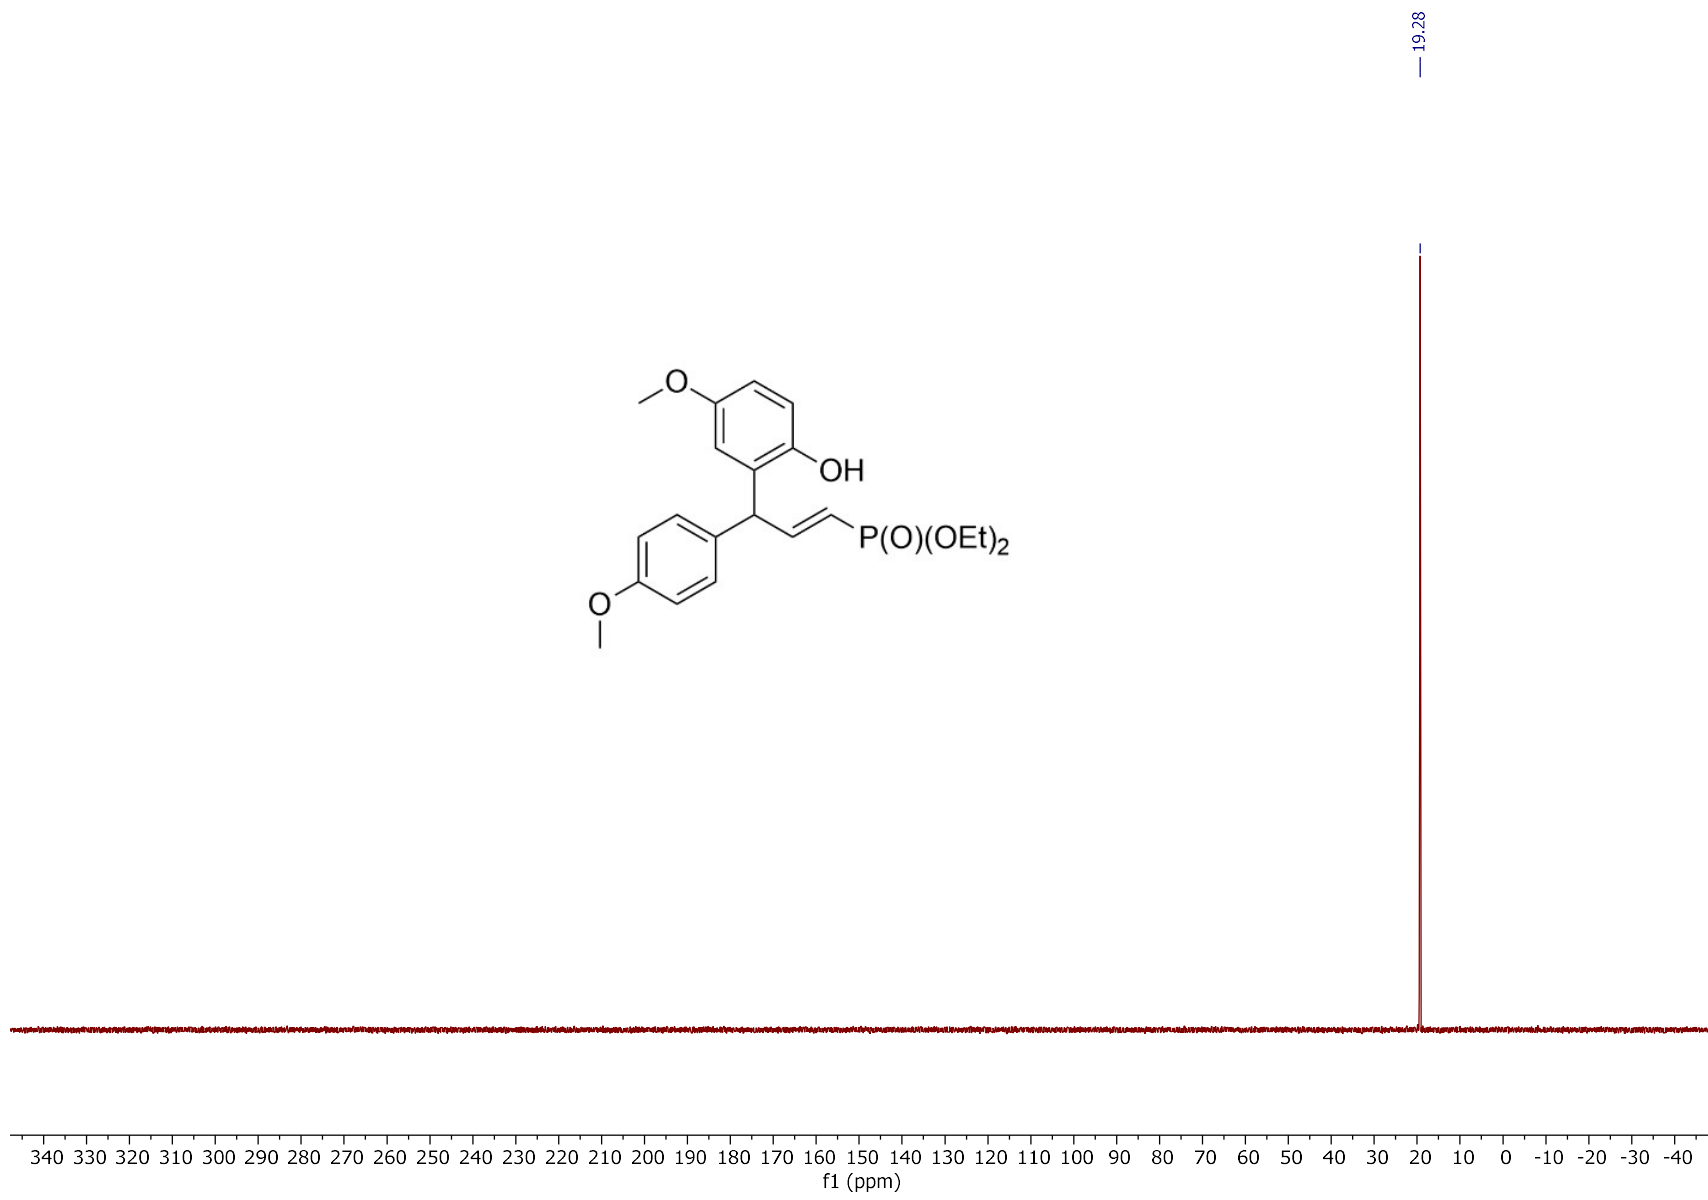

Figure S57:  $^{31}\text{P}\{^1\text{H}\}$  NMR Spectra of 3m in  $\text{CDCl}_3$

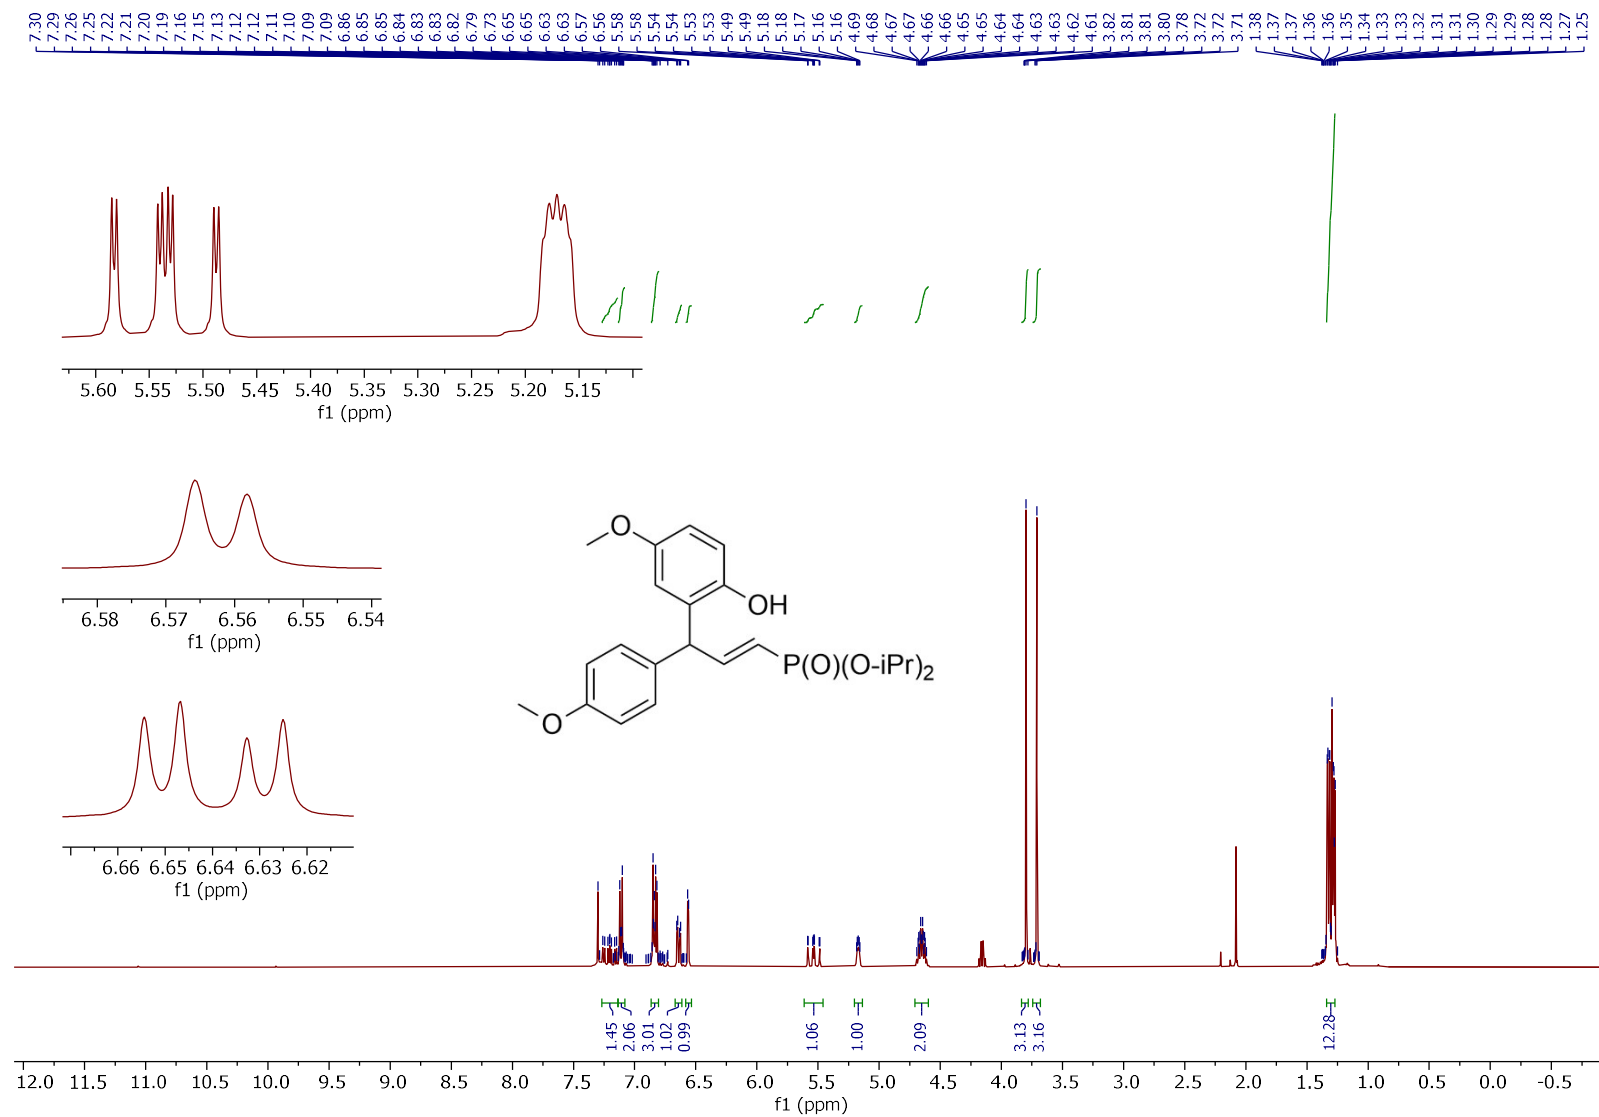

Figure S58:  $^1\text{H}$  NMR Spectra of **3n** in  $\text{CDCl}_3$

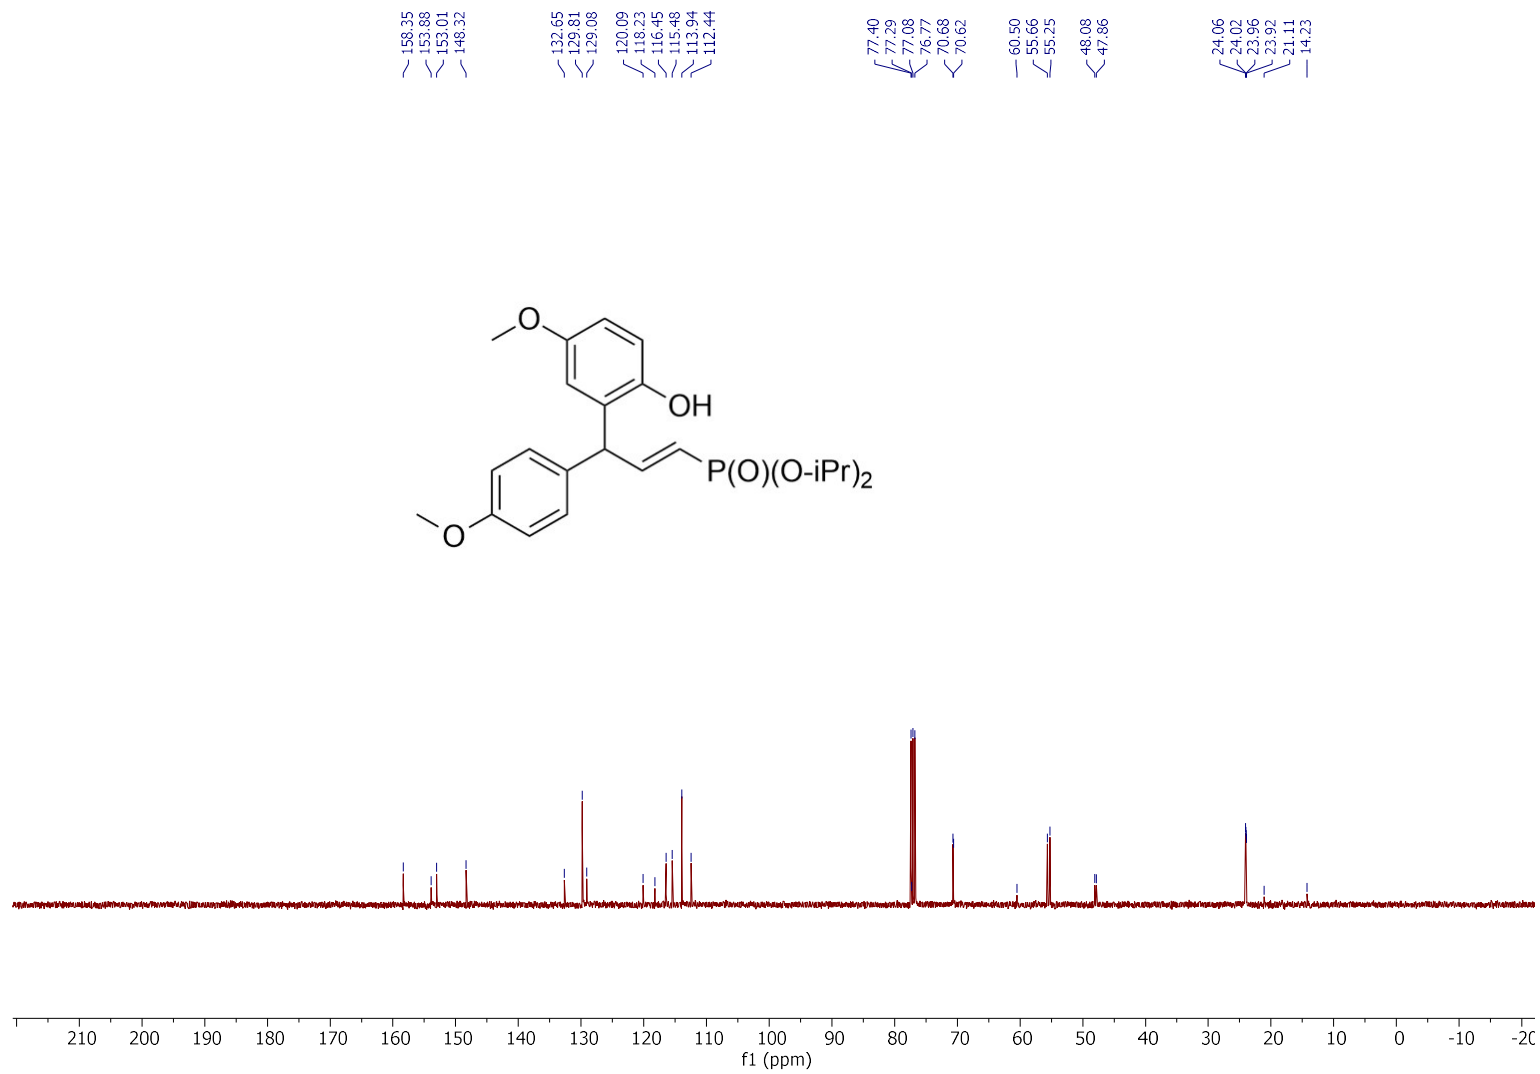

Figure S59:  $^{13}\text{C}\{^1\text{H}\}$  NMR Spectra of 3n in  $\text{CDCl}_3$

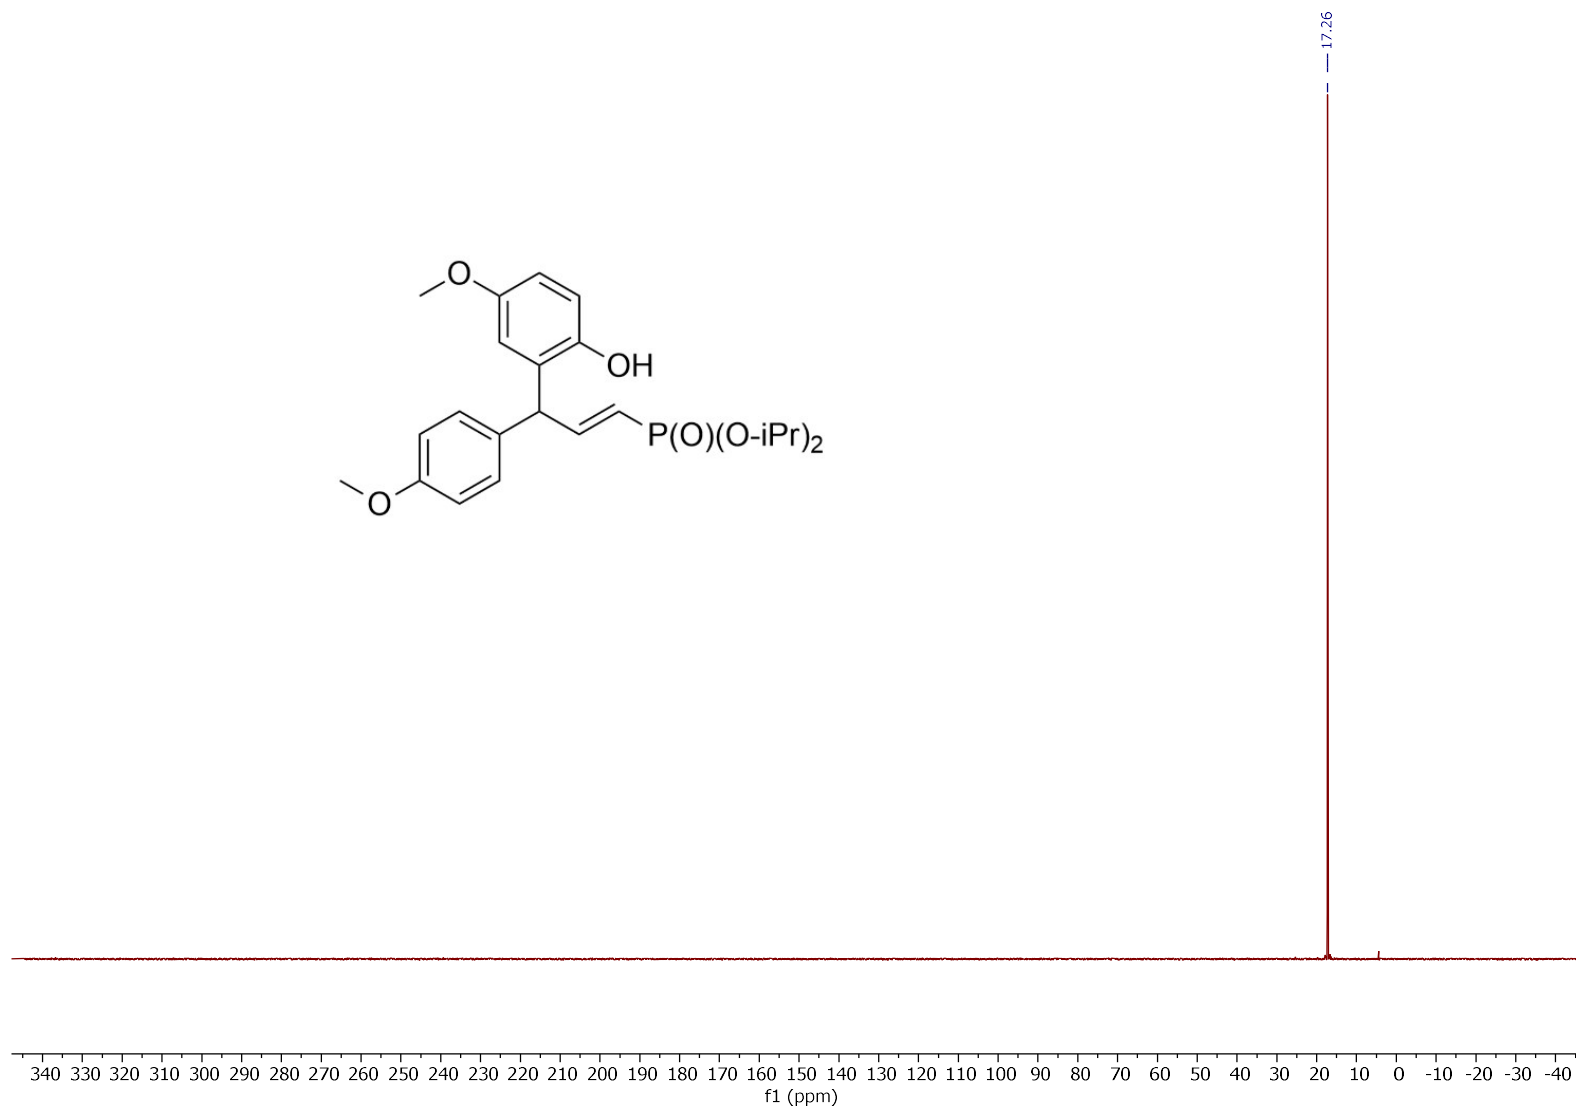

**Figure S60:**  $^{31}\text{P}\{^1\text{H}\}$  NMR Spectra of **3n** in  $\text{CDCl}_3$

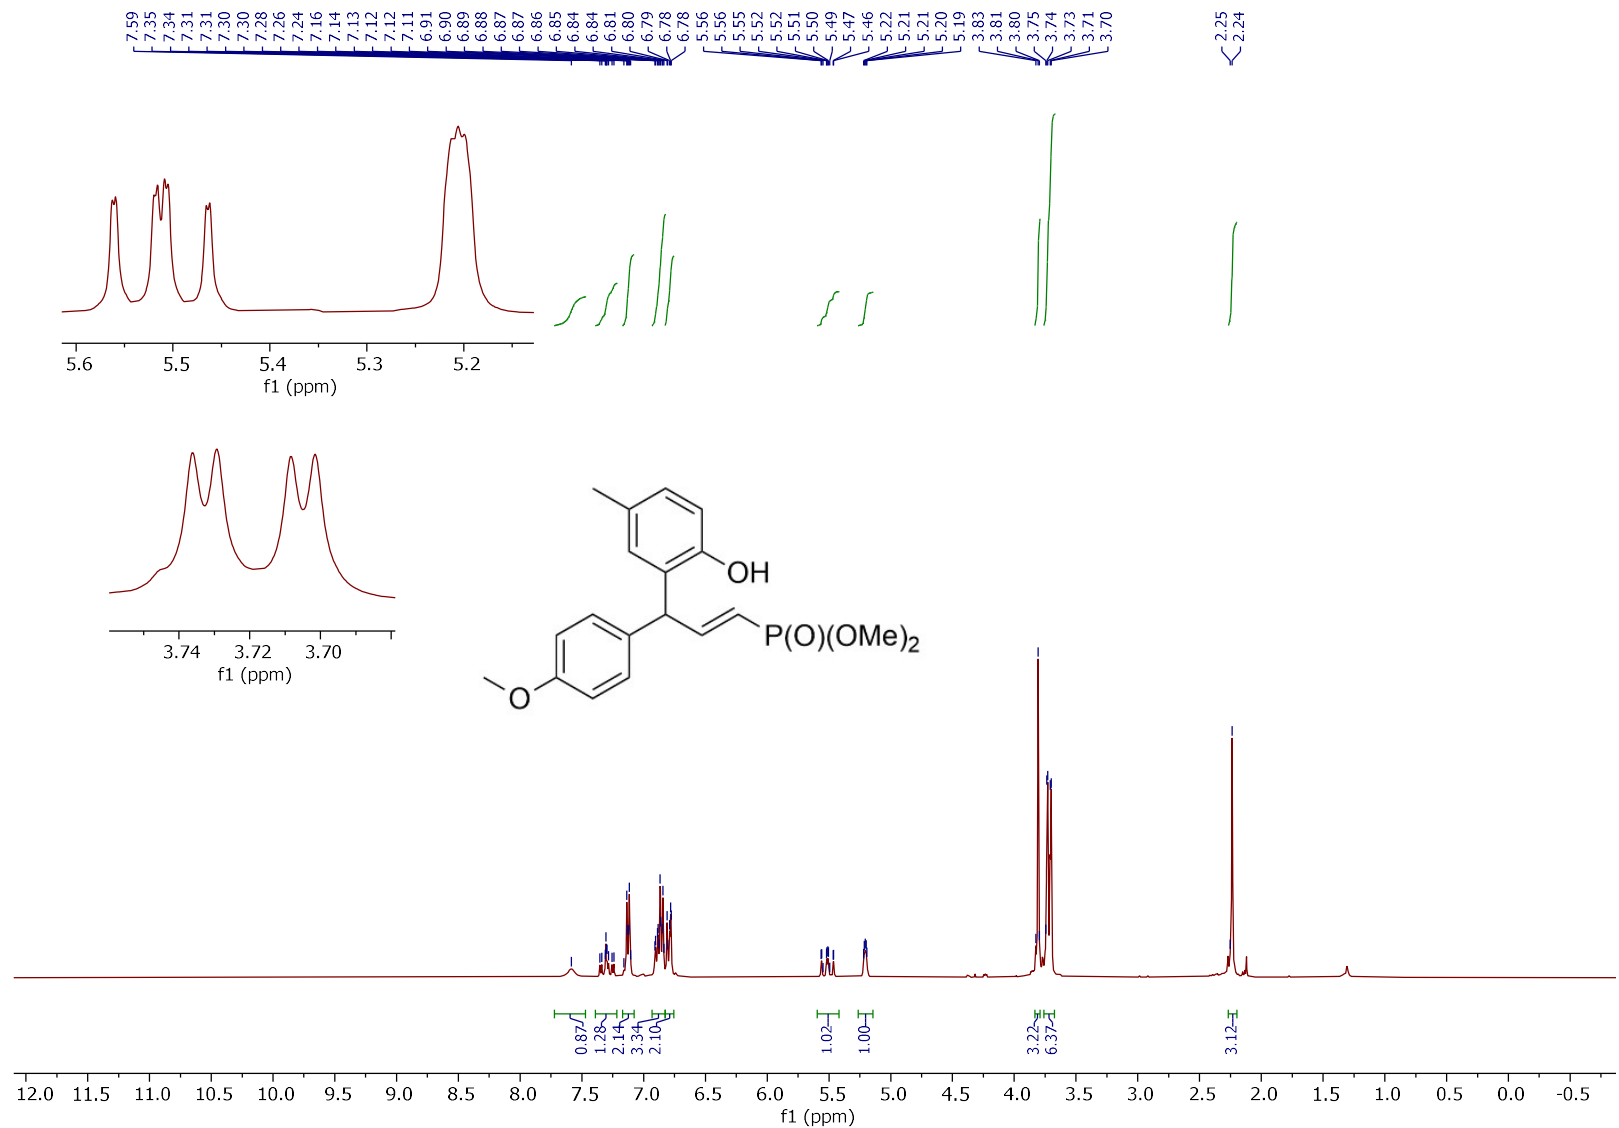

Figure S61: <sup>1</sup>H NMR Spectra of 3i in CDCl<sub>3</sub>

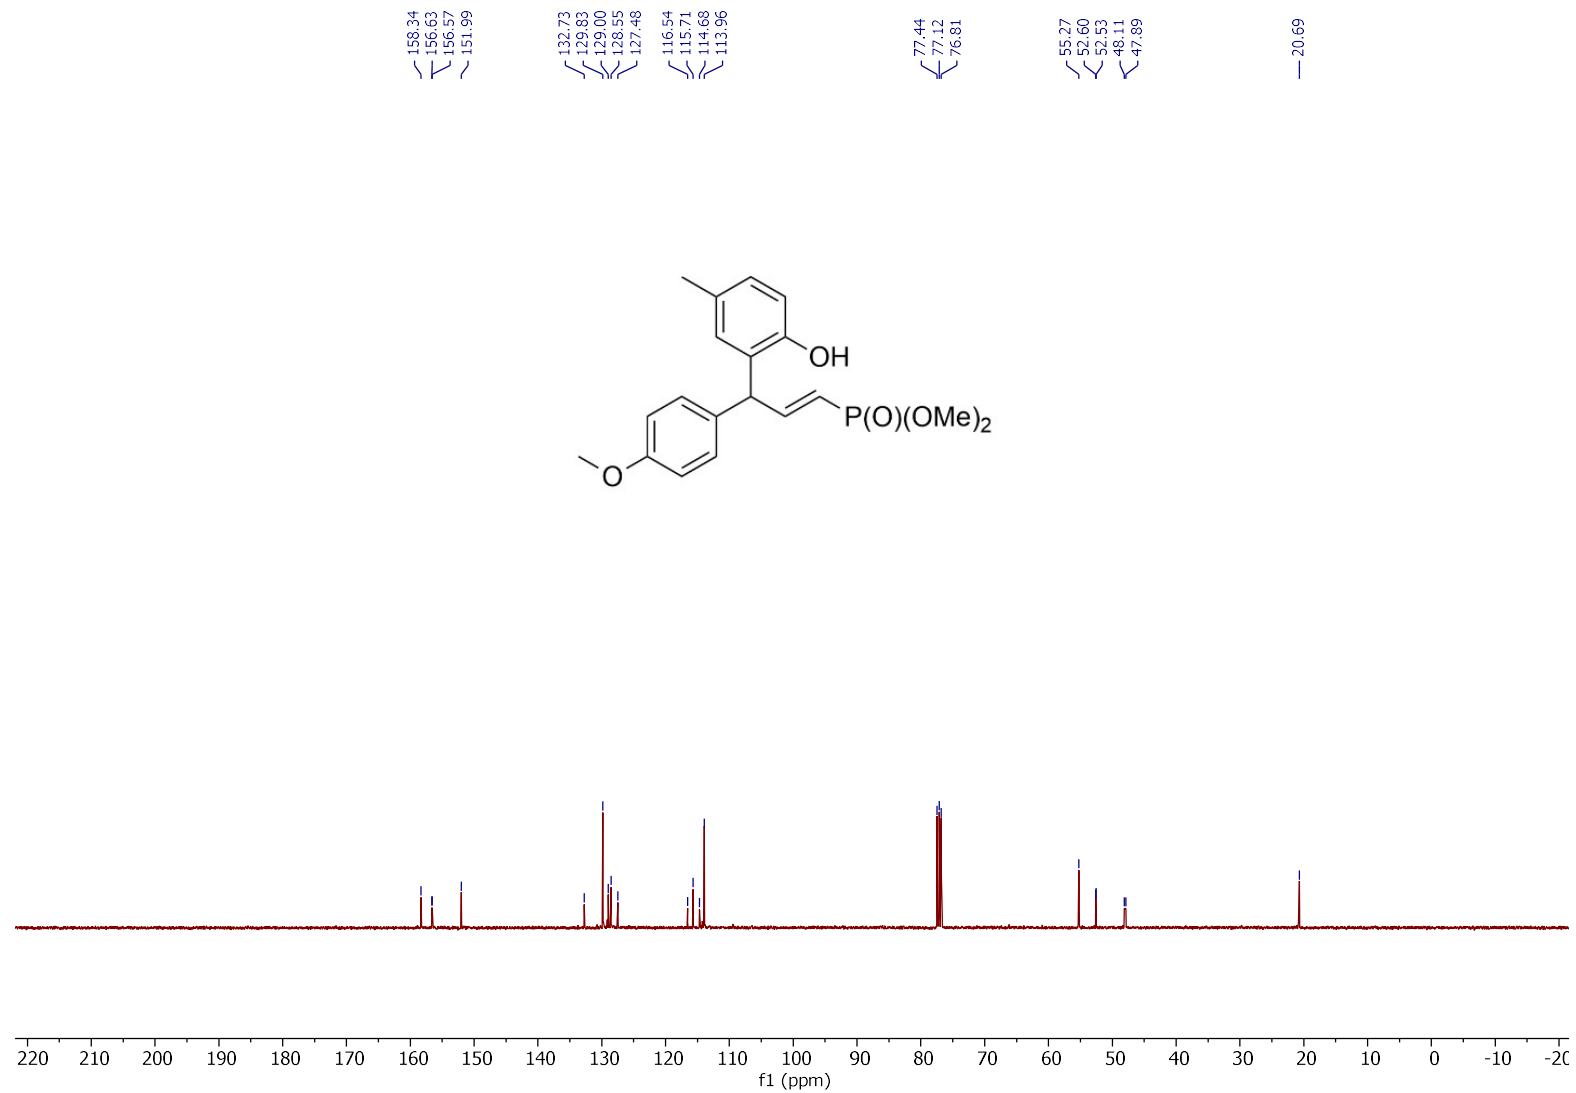

Figure S62:  $^{13}\text{C}\{^1\text{H}\}$  NMR Spectra of 3i in  $\text{CDCl}_3$

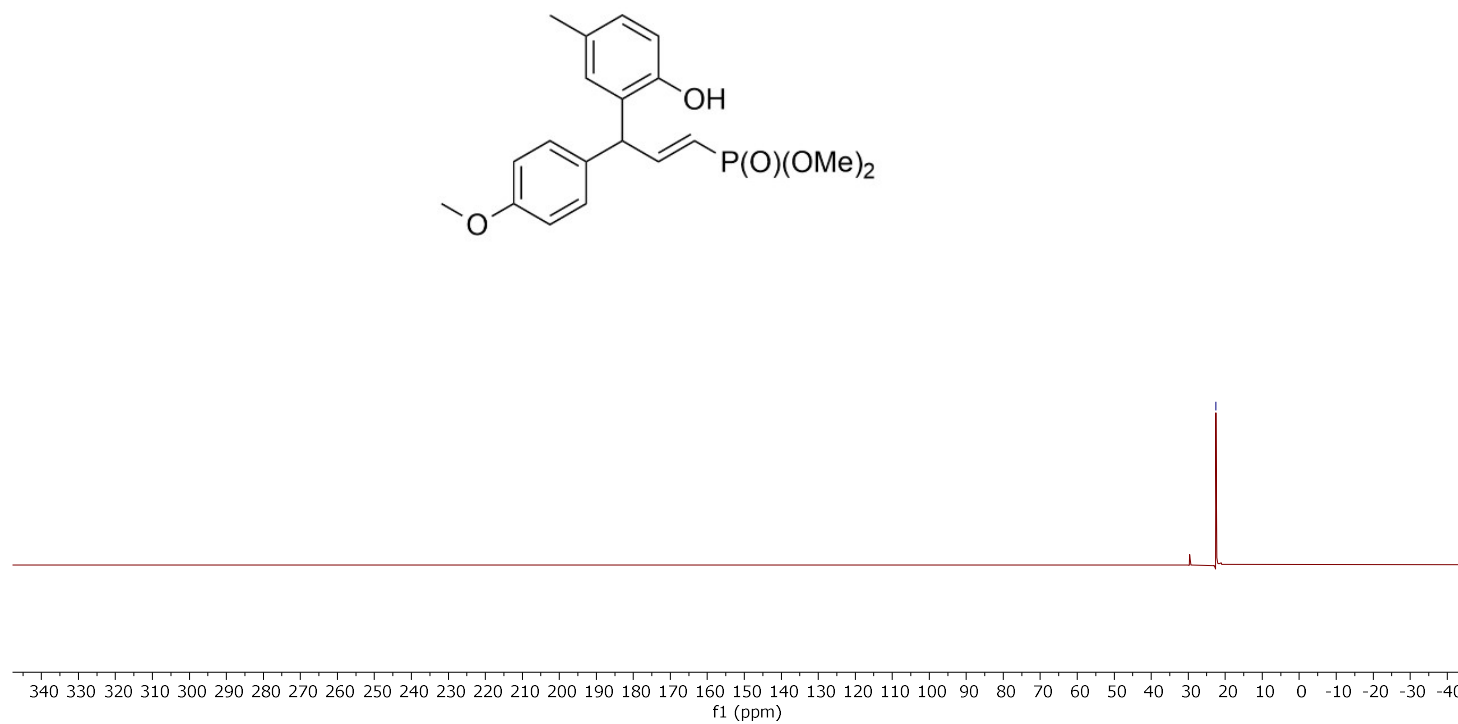

**Figure S63:  $^{31}\text{P}\{^1\text{H}\}$  NMR Spectra of 3i in  $\text{CDCl}_3$**

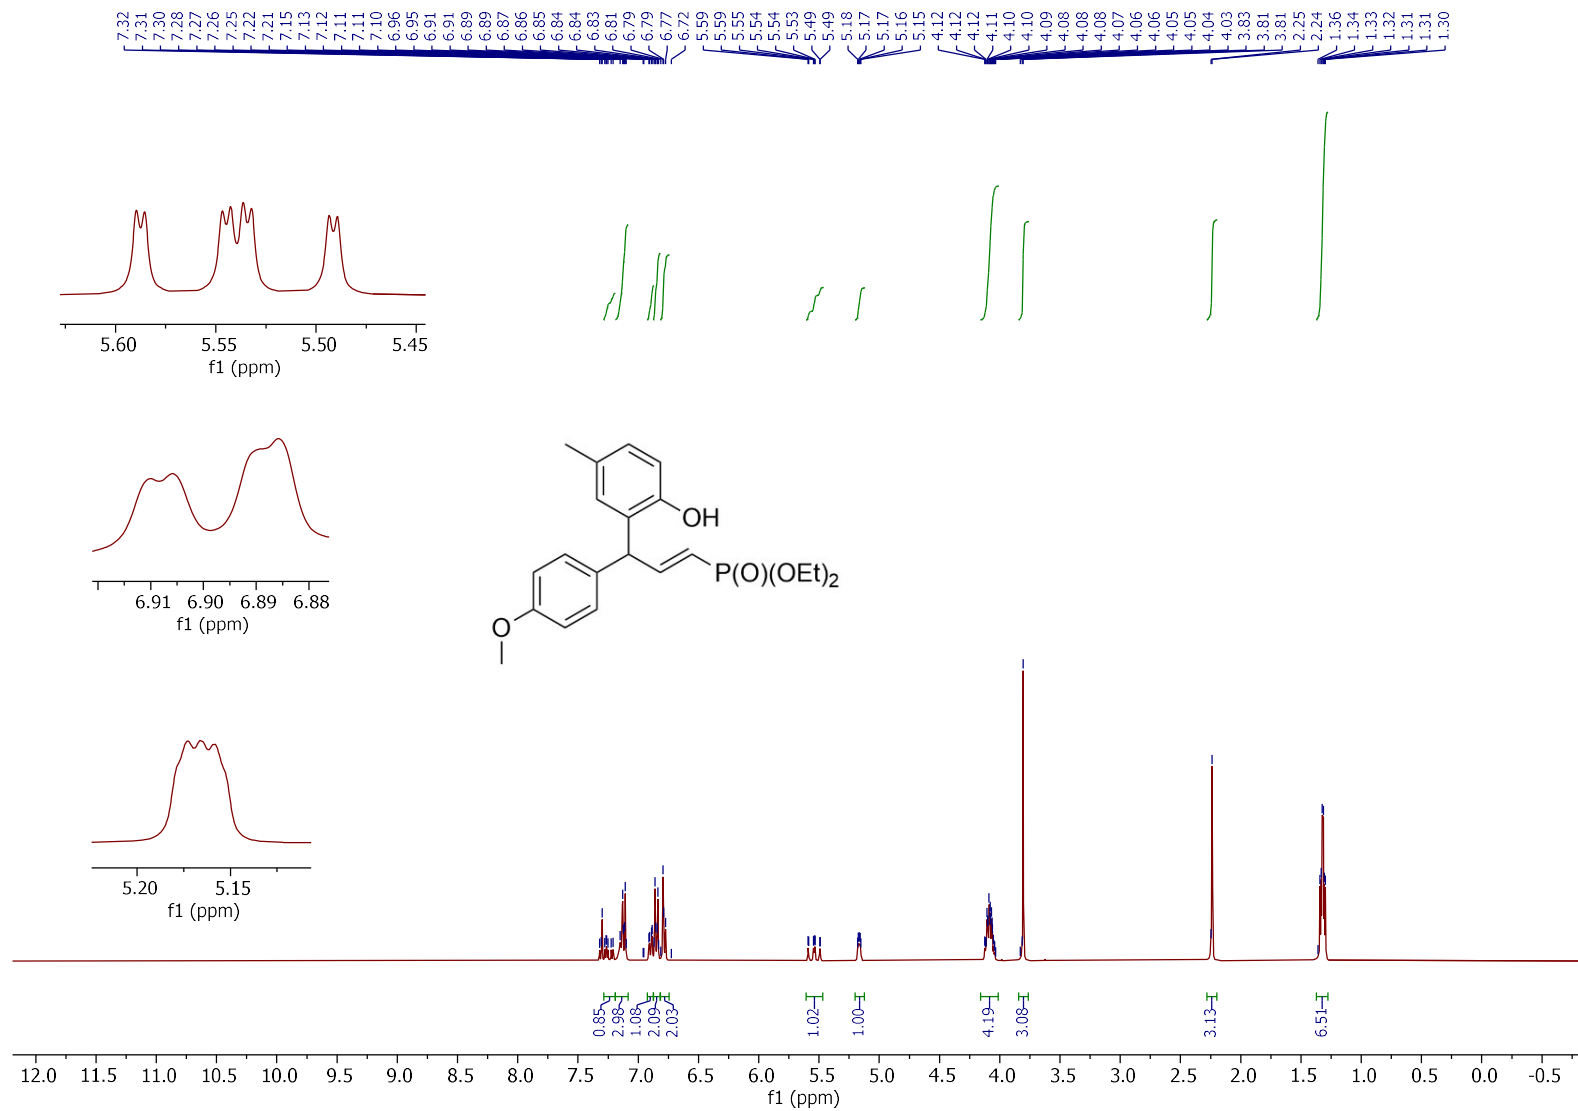

Figure S64:  $^1\text{H}$  NMR Spectra of 3j in  $\text{CDCl}_3$

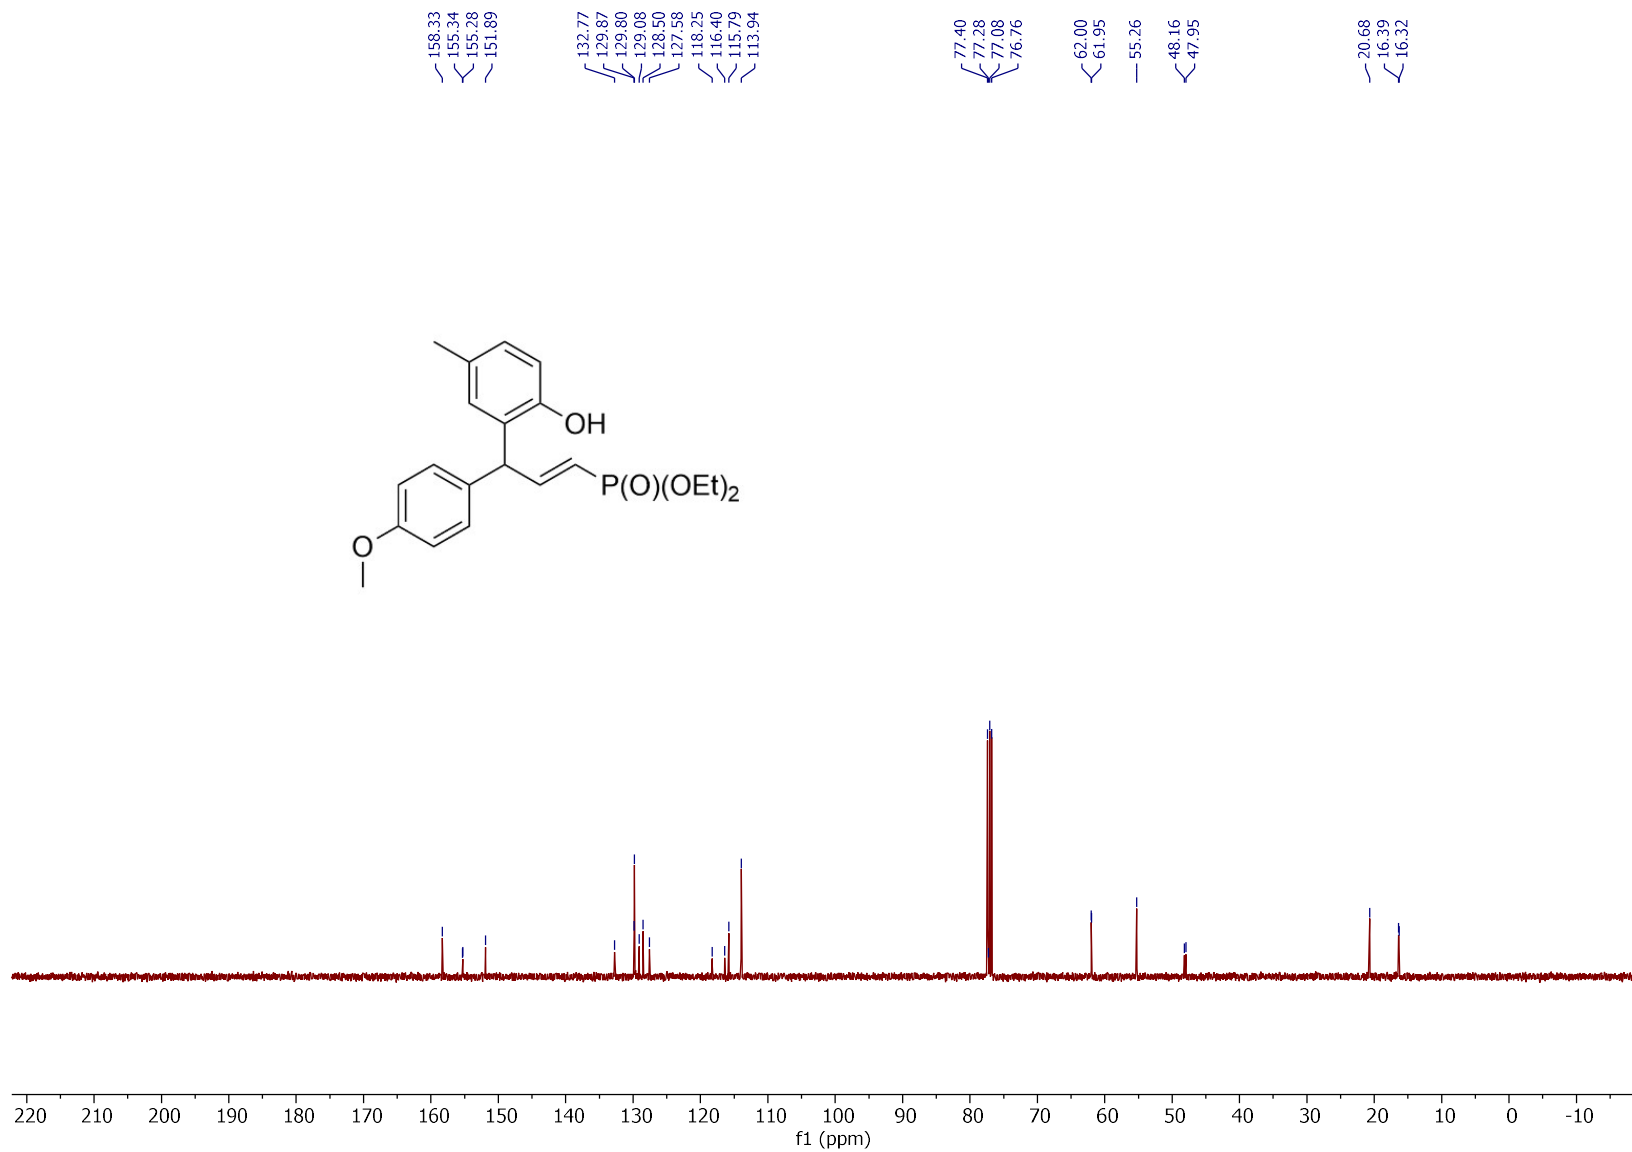

Figure S65:  $^{13}\text{C}\{^1\text{H}\}$  NMR Spectra of 3j in  $\text{CDCl}_3$

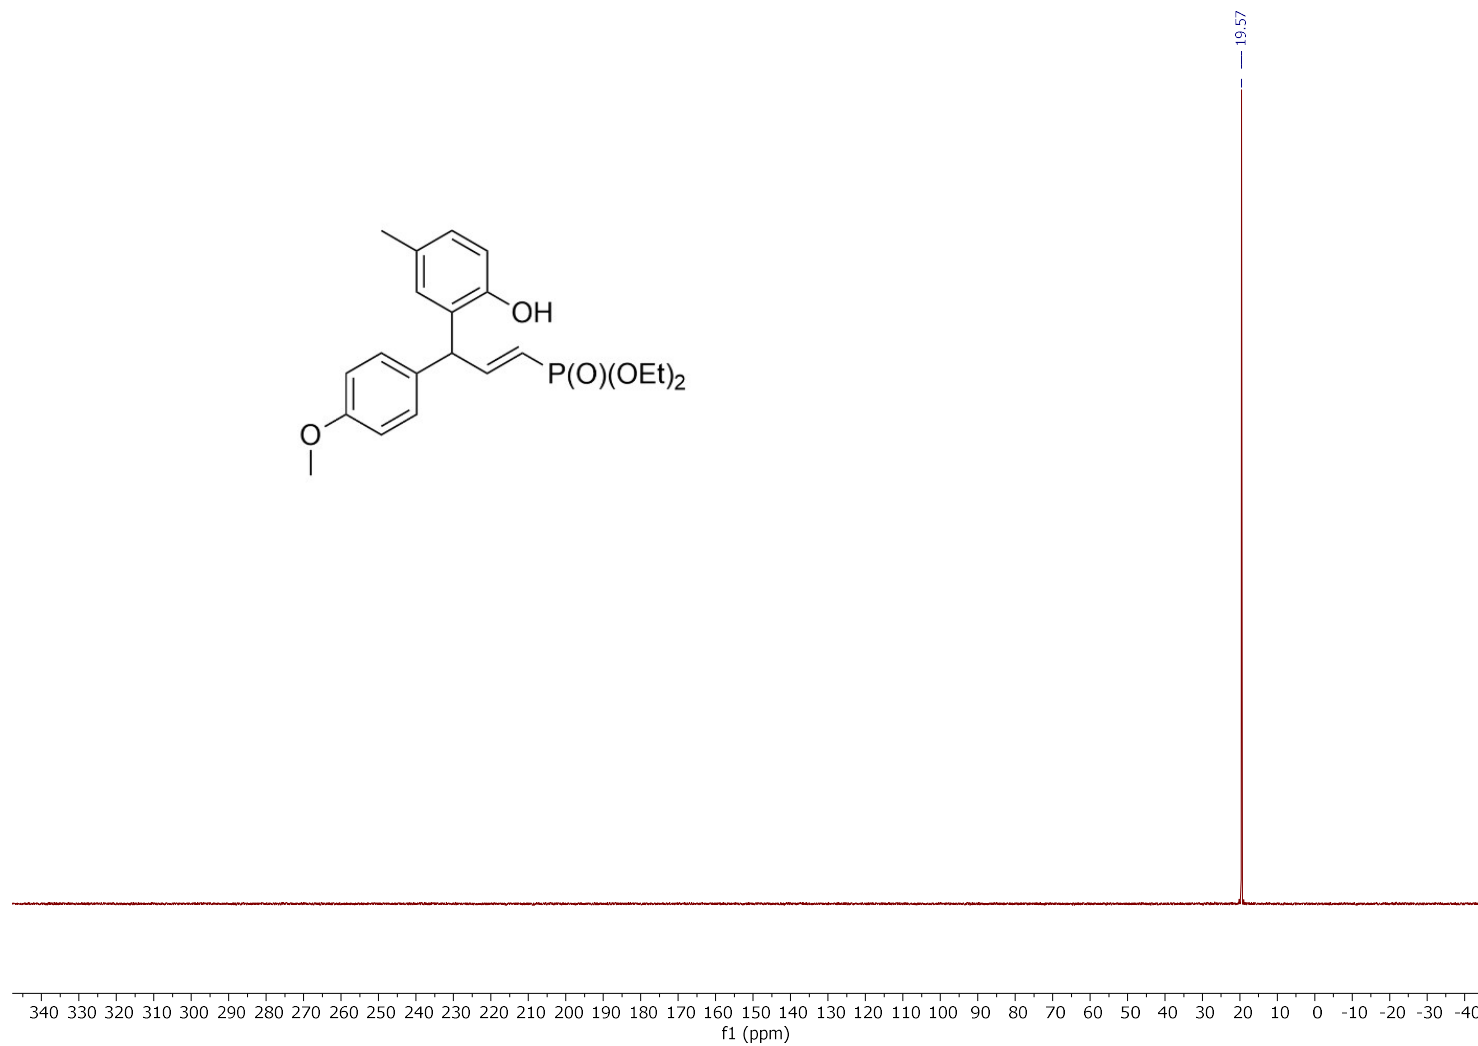

**Figure S66:**  $^{31}\text{P}\{^1\text{H}\}$  NMR Spectra of 3j in  $\text{CDCl}_3$

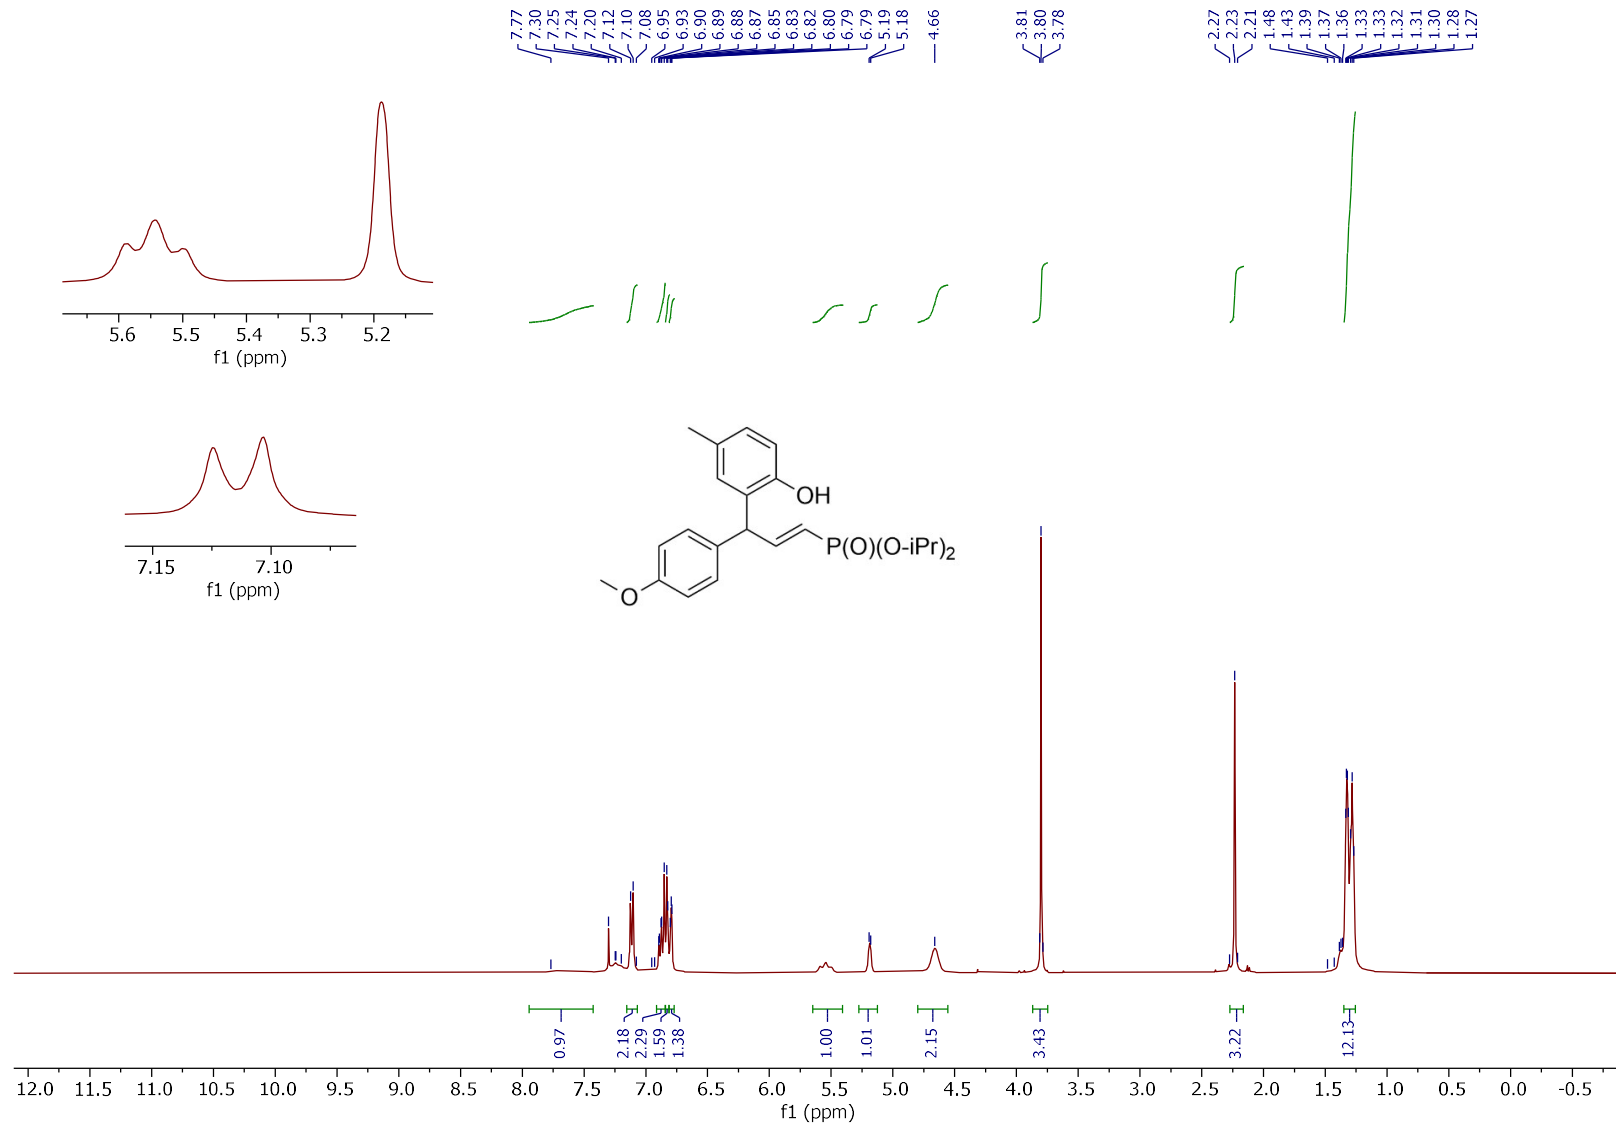

**Figure S67: <sup>1</sup>H NMR Spectra of 3k in CDCl<sub>3</sub>**

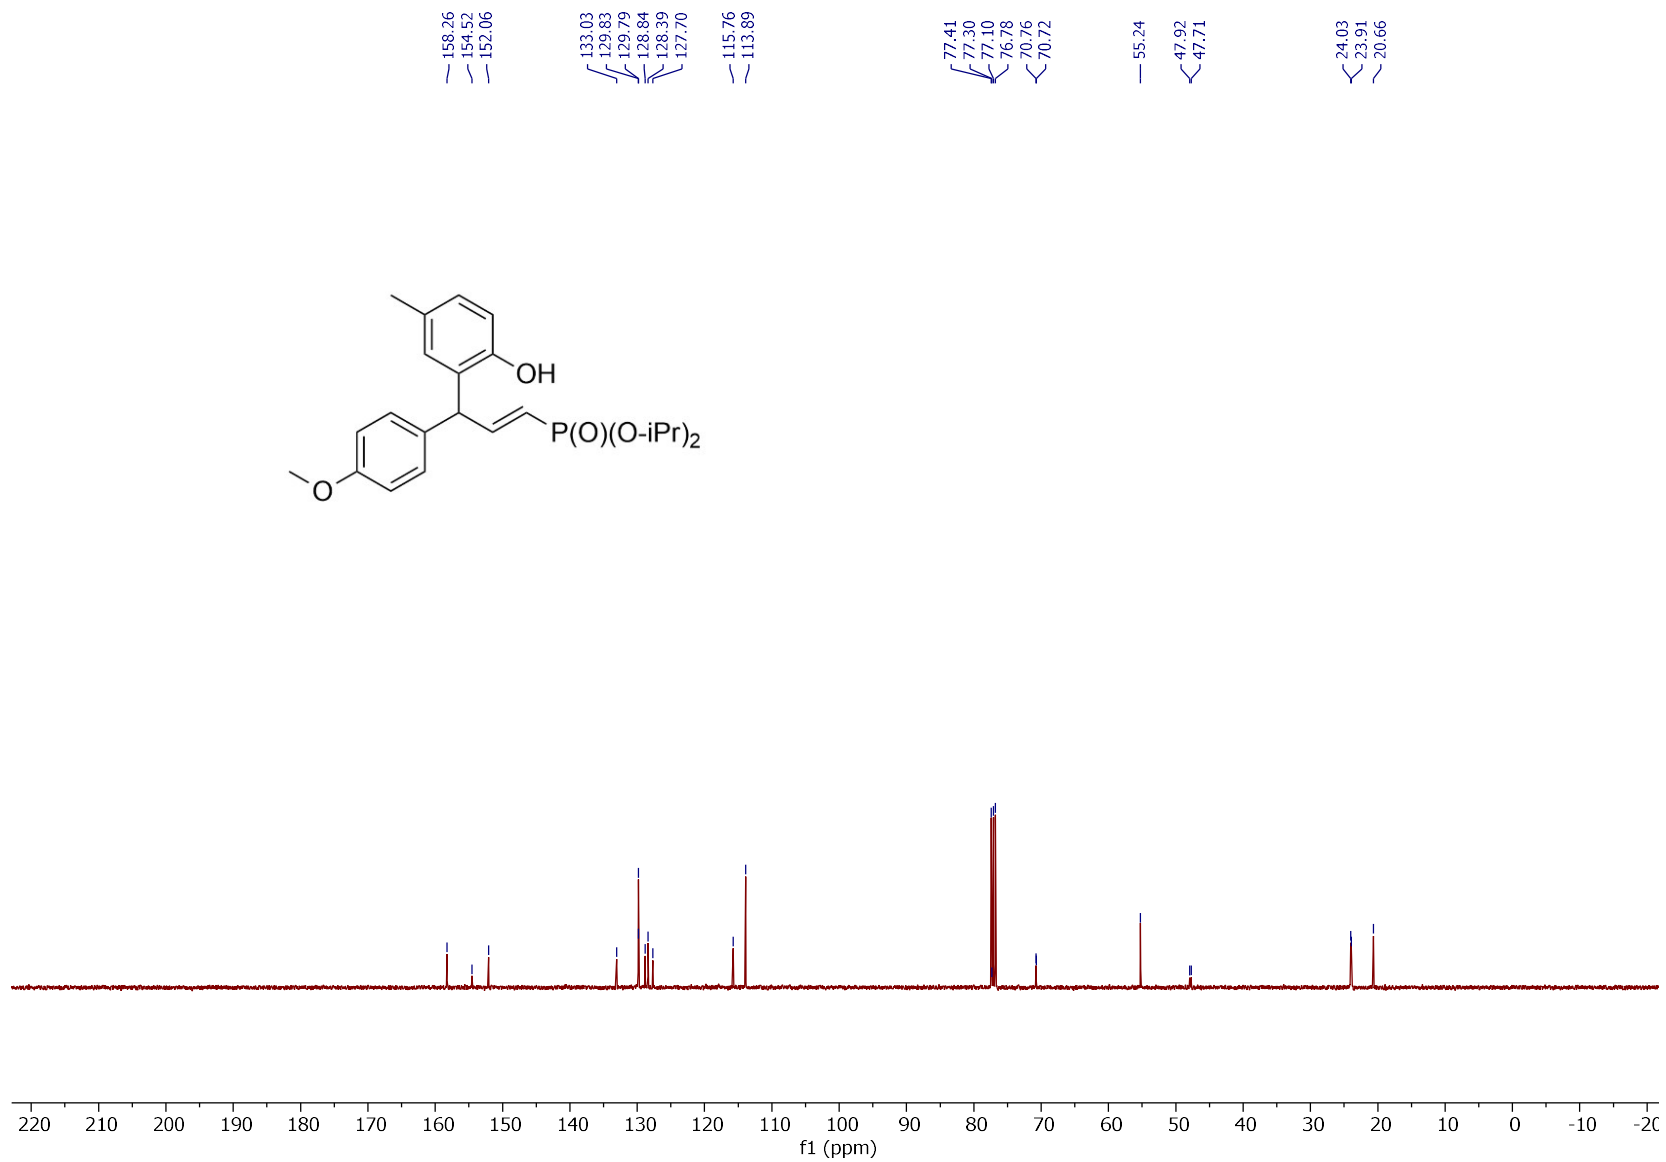

Figure S68:  $^{13}\text{C}\{^1\text{H}\}$  NMR Spectra of 3k in  $\text{CDCl}_3$

—17.42

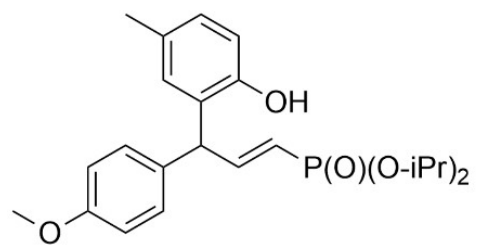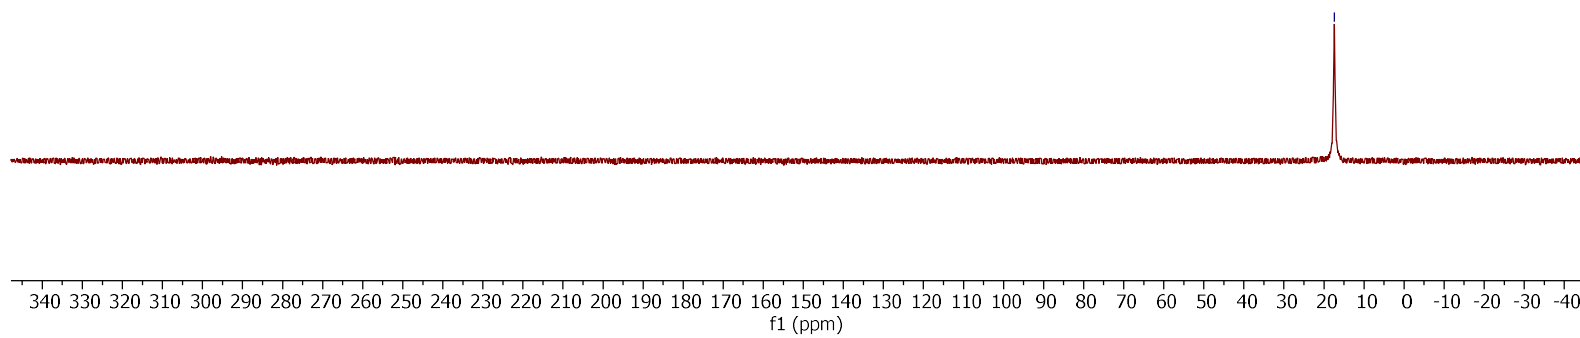

Figure S69:  $^{31}\text{P}\{^1\text{H}\}$  NMR Spectra of 3k in  $\text{CDCl}_3$

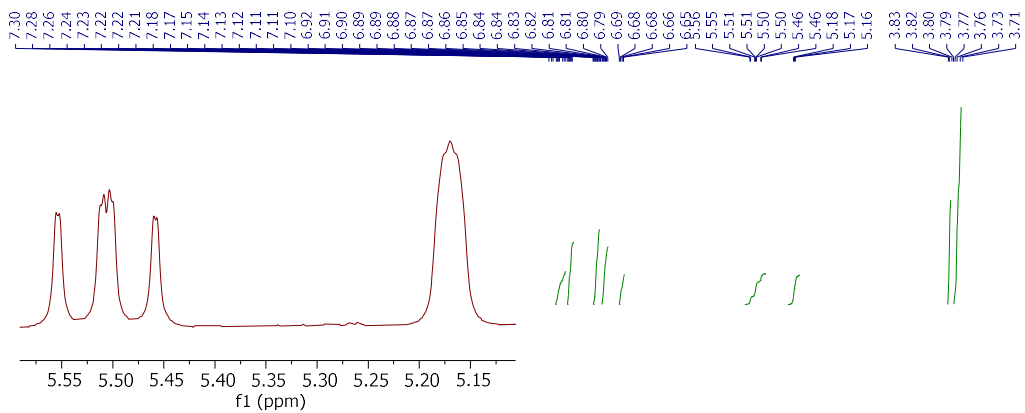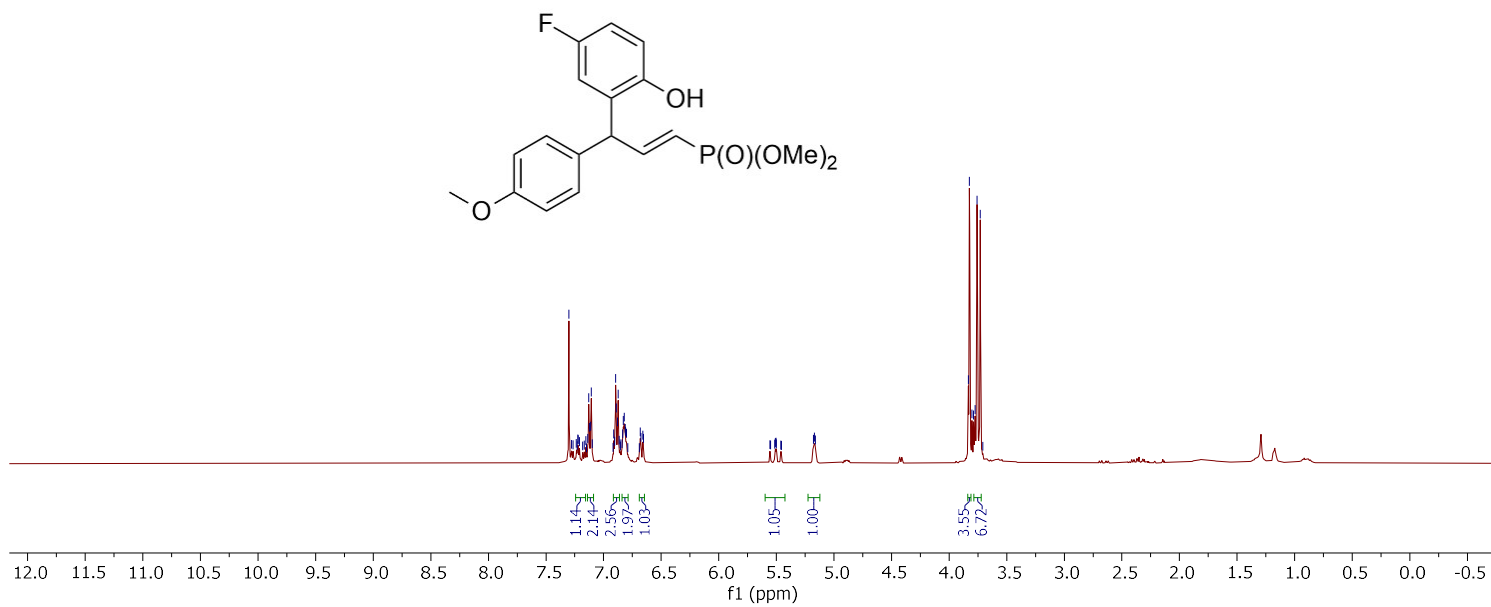

Figure S70:  $^1\text{H}$  NMR Spectra of 3o in  $\text{CDCl}_3$

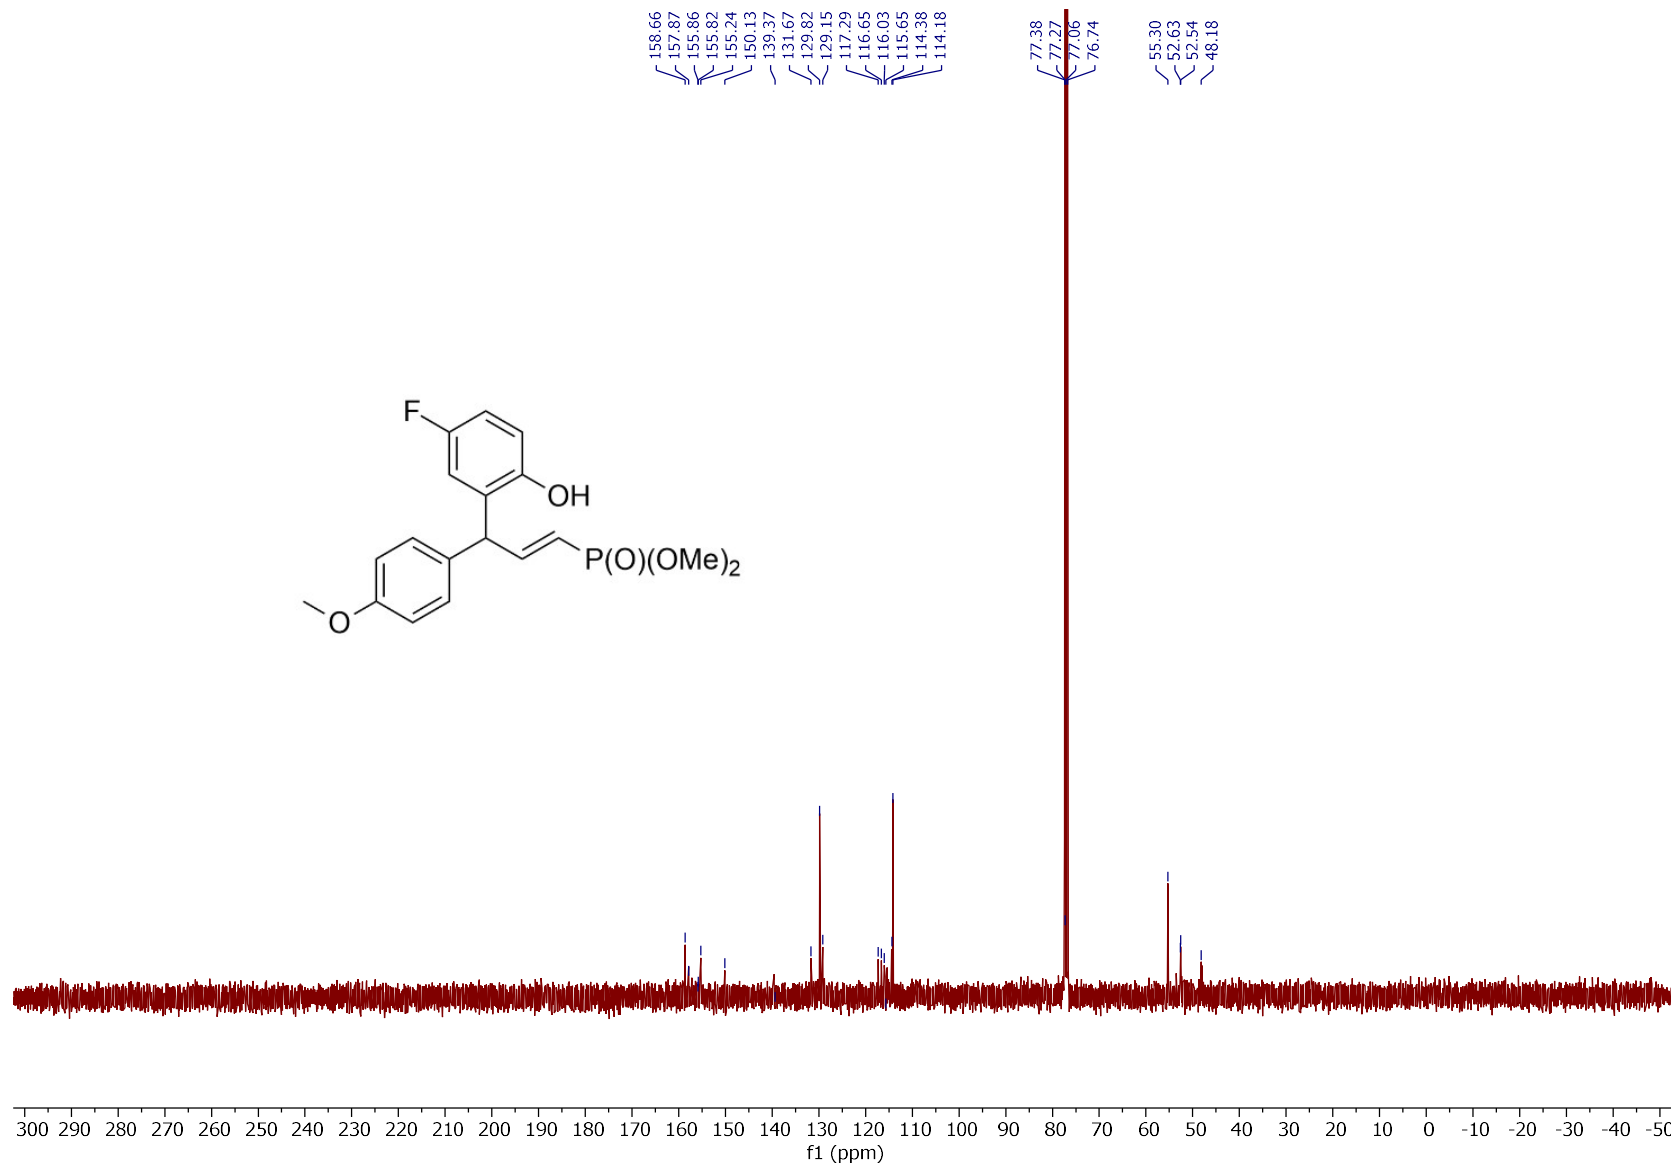

Figure S71:  $^{13}\text{C}\{^1\text{H}\}$  NMR Spectra of 3o in  $\text{CDCl}_3$

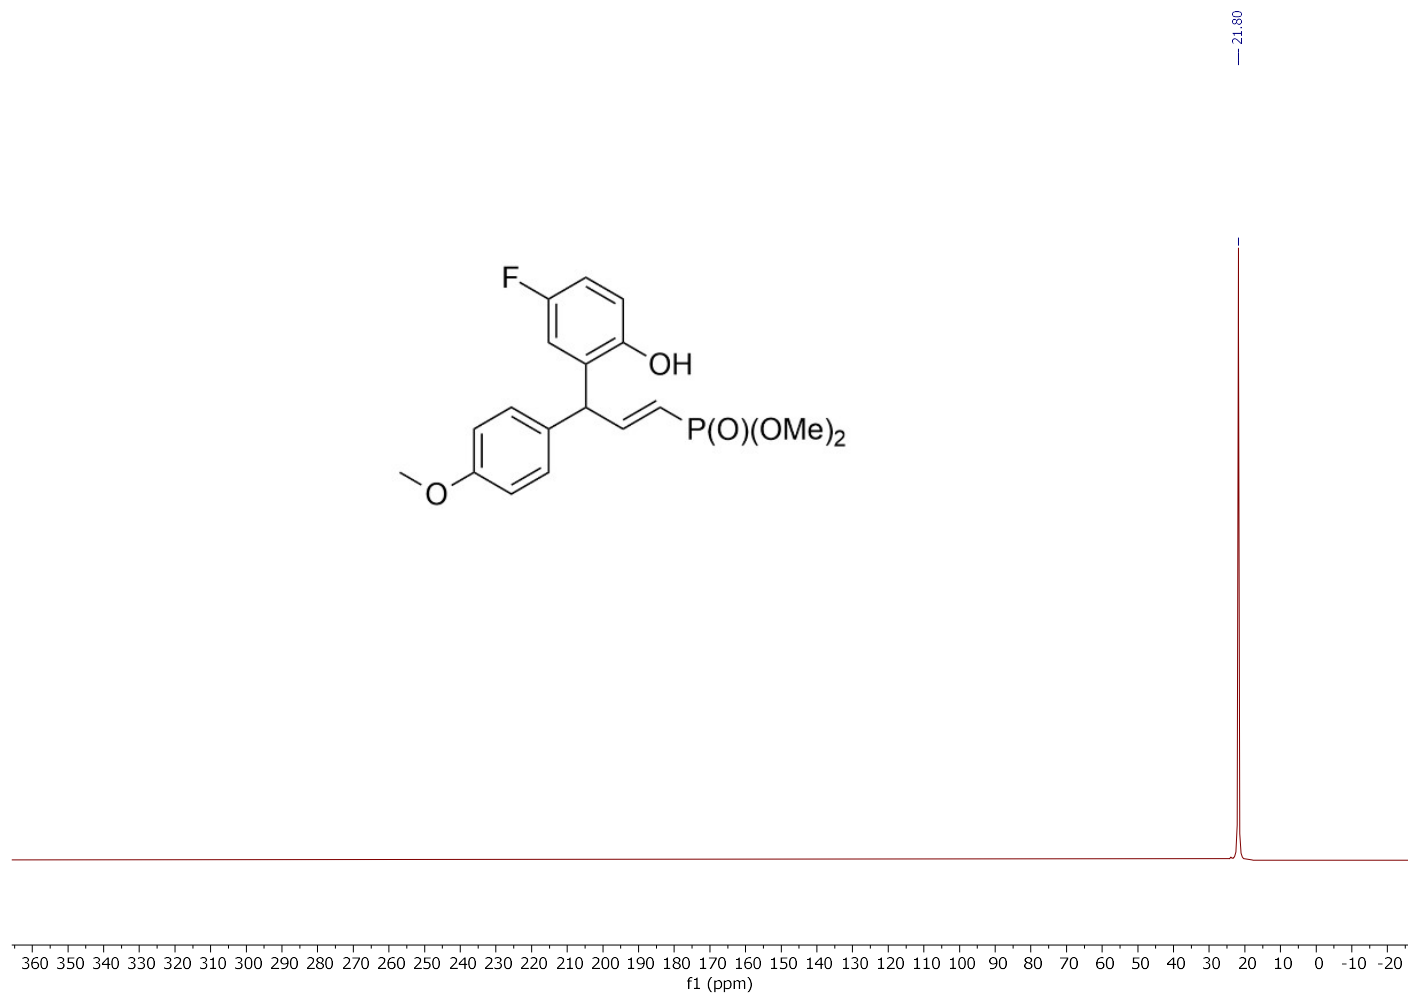

**Figure S72:**  $^{31}\text{P}\{^1\text{H}\}$  NMR Spectra of **3o** in  $\text{CDCl}_3$

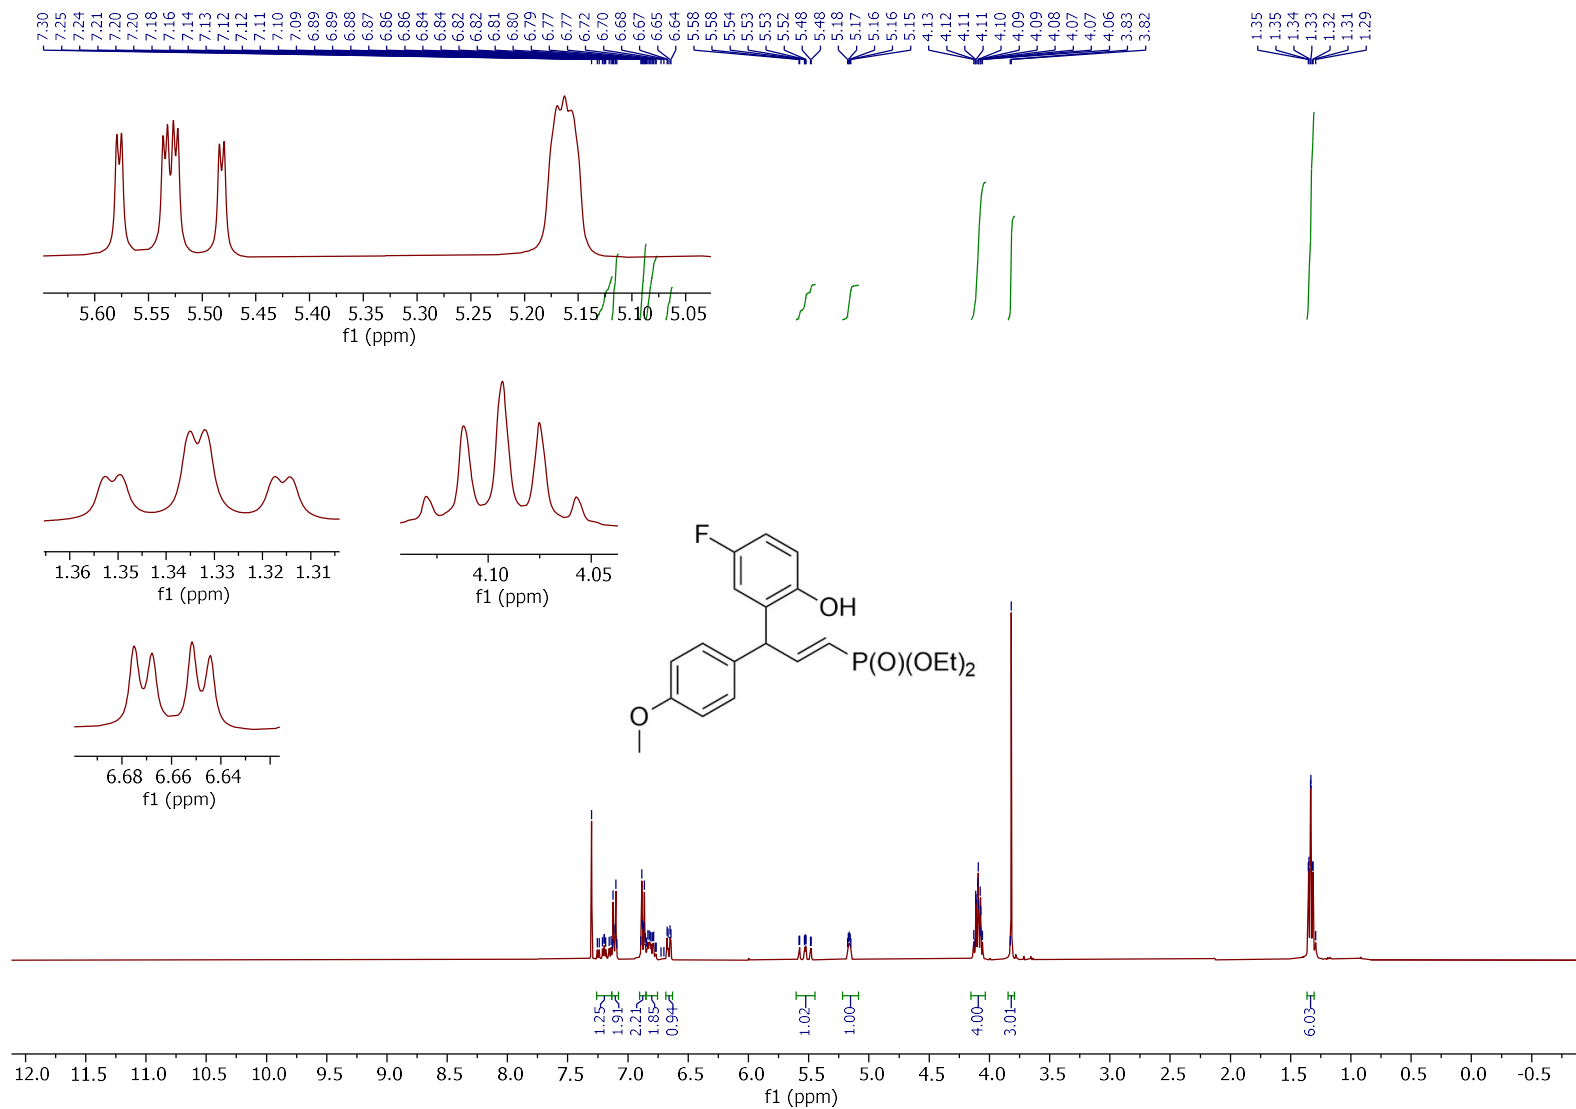

Figure S73:  $^1\text{H}$  NMR Spectra of 3p in  $\text{CDCl}_3$

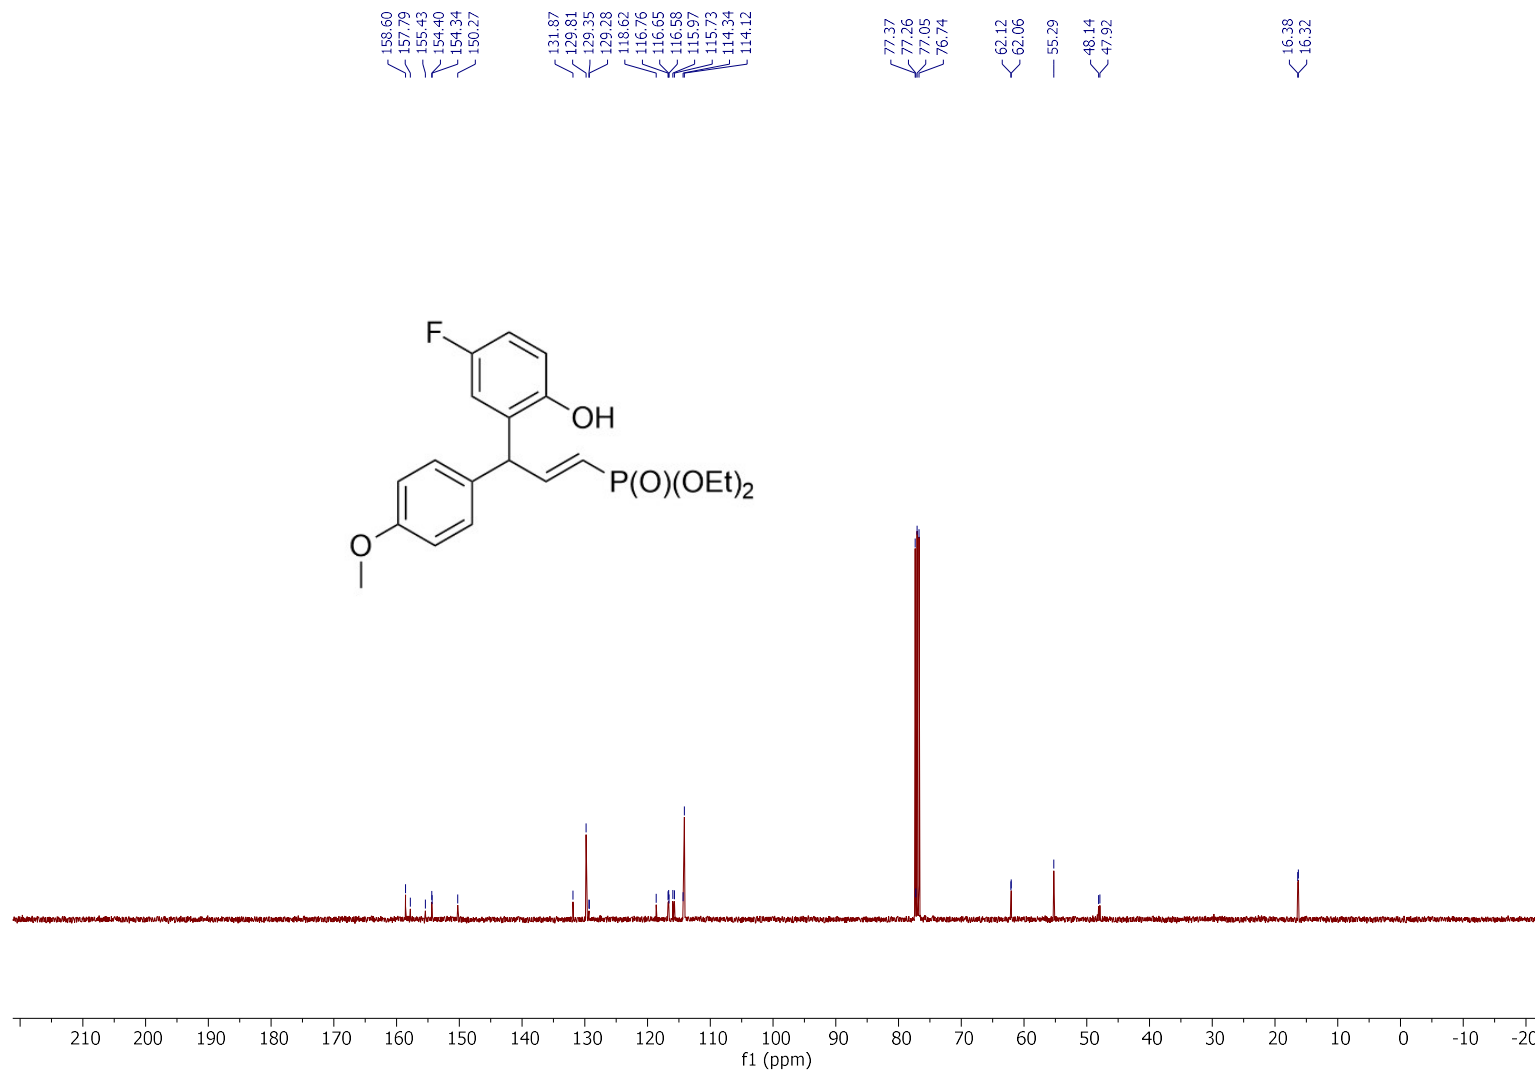

Figure S74:  $^{13}\text{C}\{^1\text{H}\}$  NMR Spectra of 3p in  $\text{CDCl}_3$

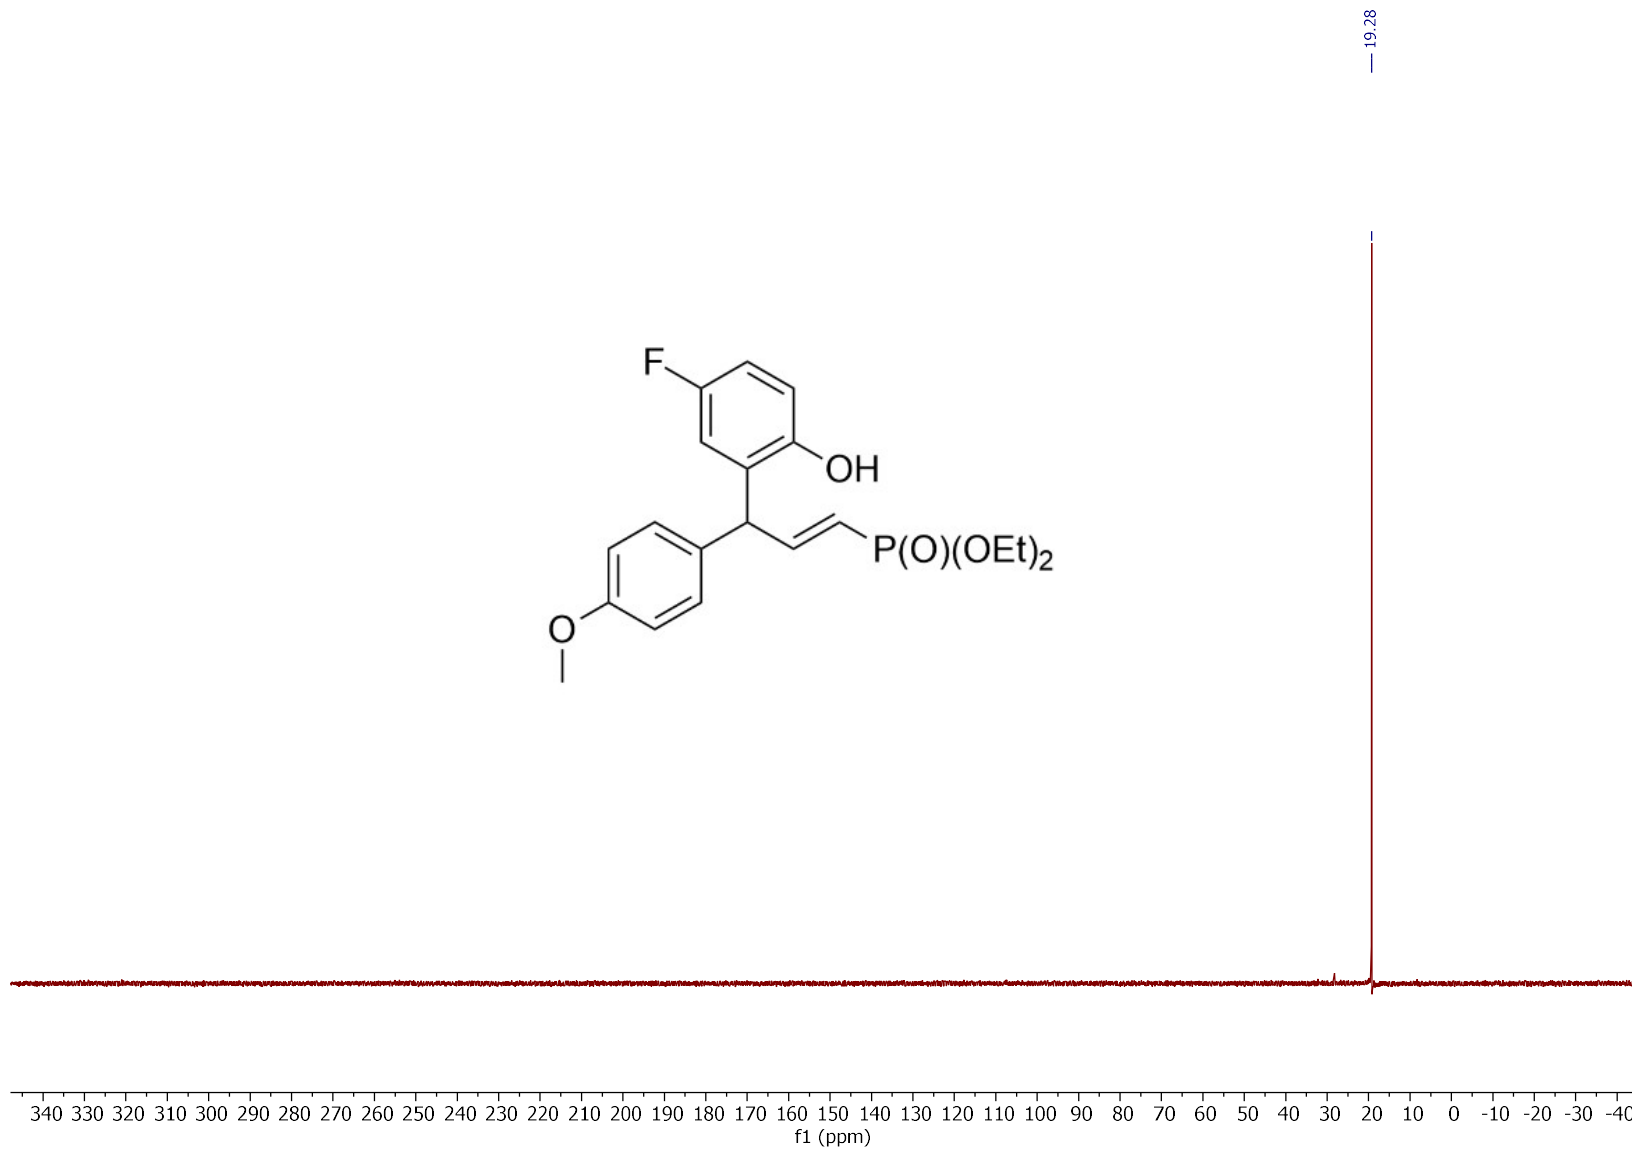

Figure S75:  $^{31}\text{P}\{^1\text{H}\}$  NMR Spectra of 3p in  $\text{CDCl}_3$

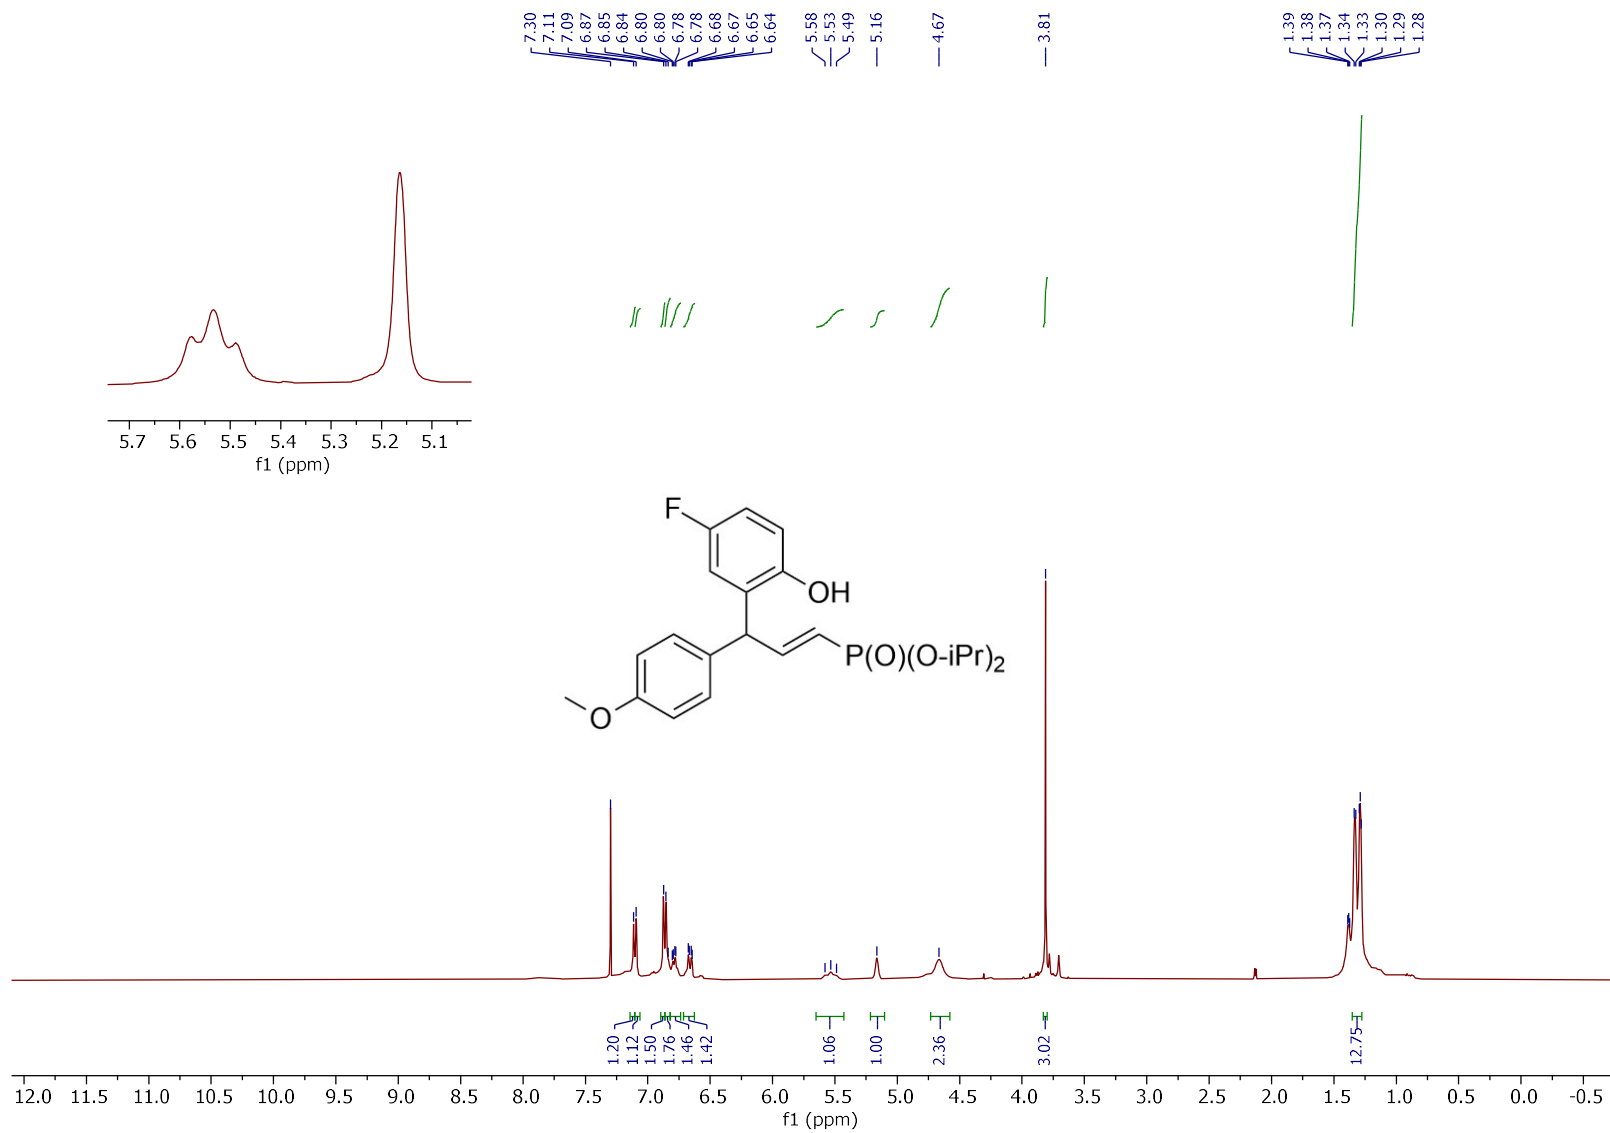

Figure S76:  $^1\text{H}$  NMR Spectra of 3q in  $\text{CDCl}_3$

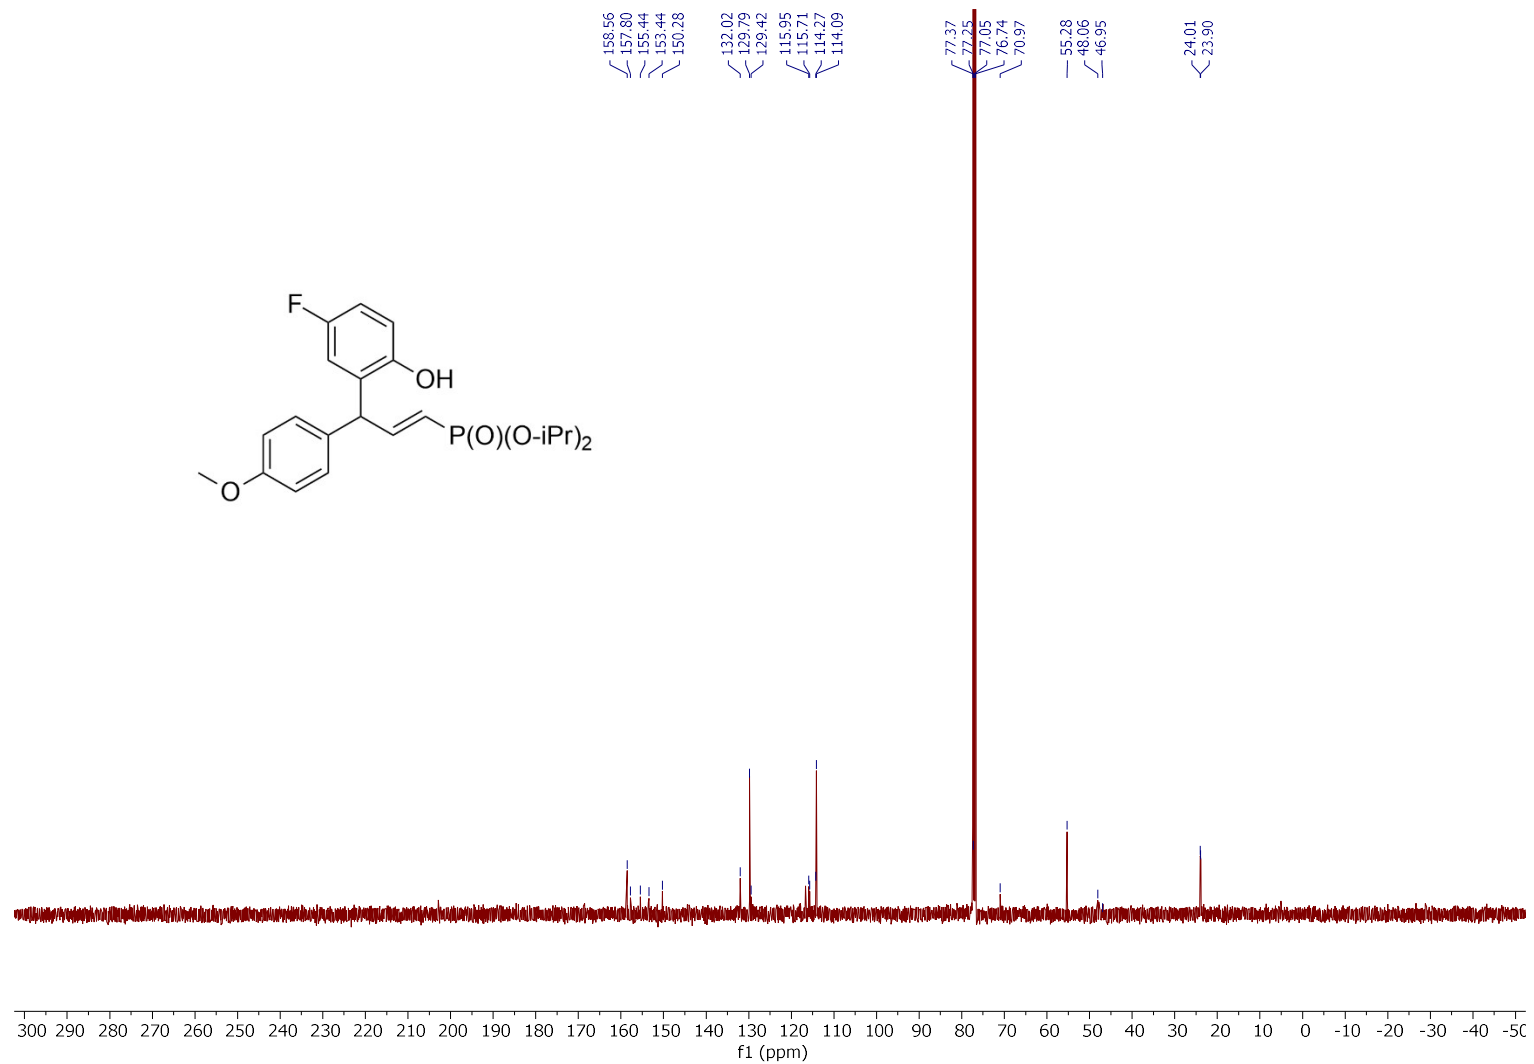

Figure S77:  $^{13}\text{C}\{^1\text{H}\}$  NMR Spectra of 3q in  $\text{CDCl}_3$

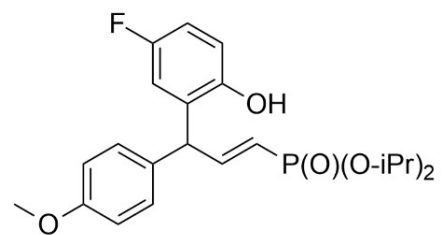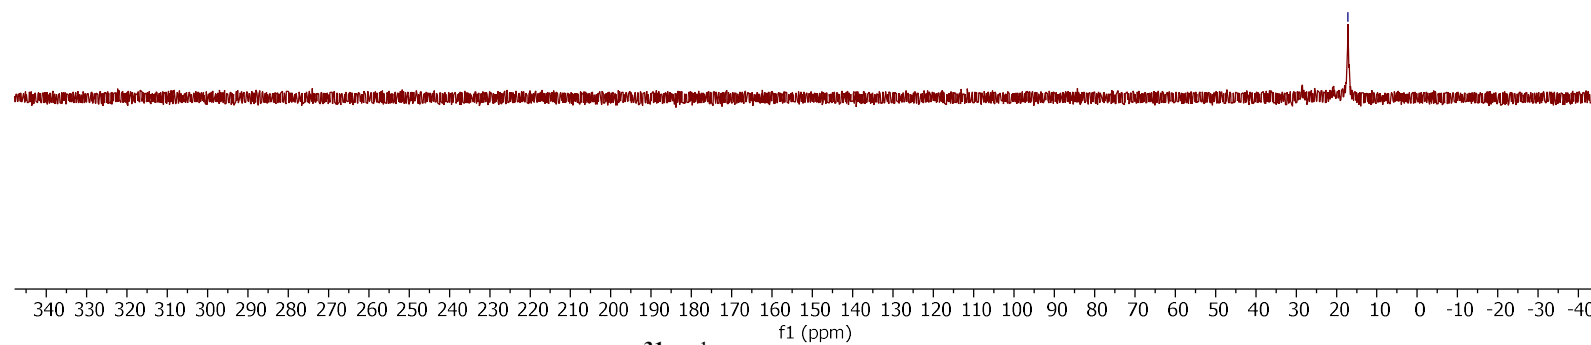

Figure S78:  $^{31}\text{P}\{^1\text{H}\}$  NMR Spectra of 3q in  $\text{CDCl}_3$

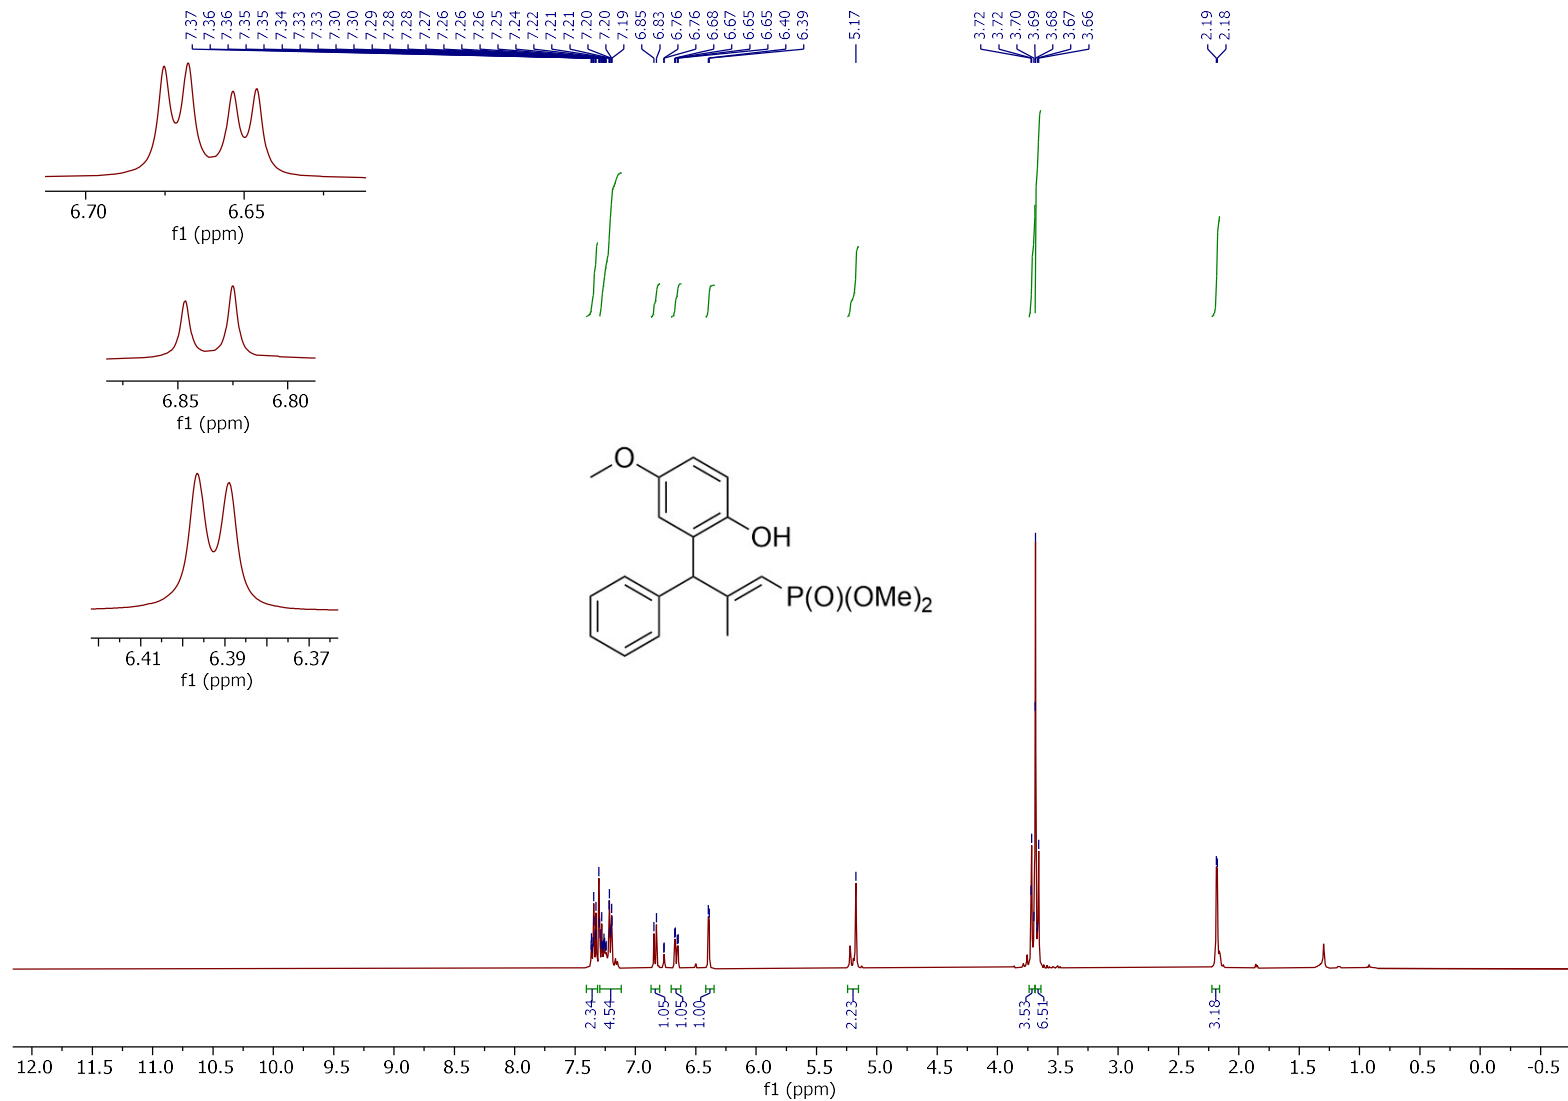

Figure S79:  $^1\text{H}$  NMR Spectra of **3u** in  $\text{CDCl}_3$

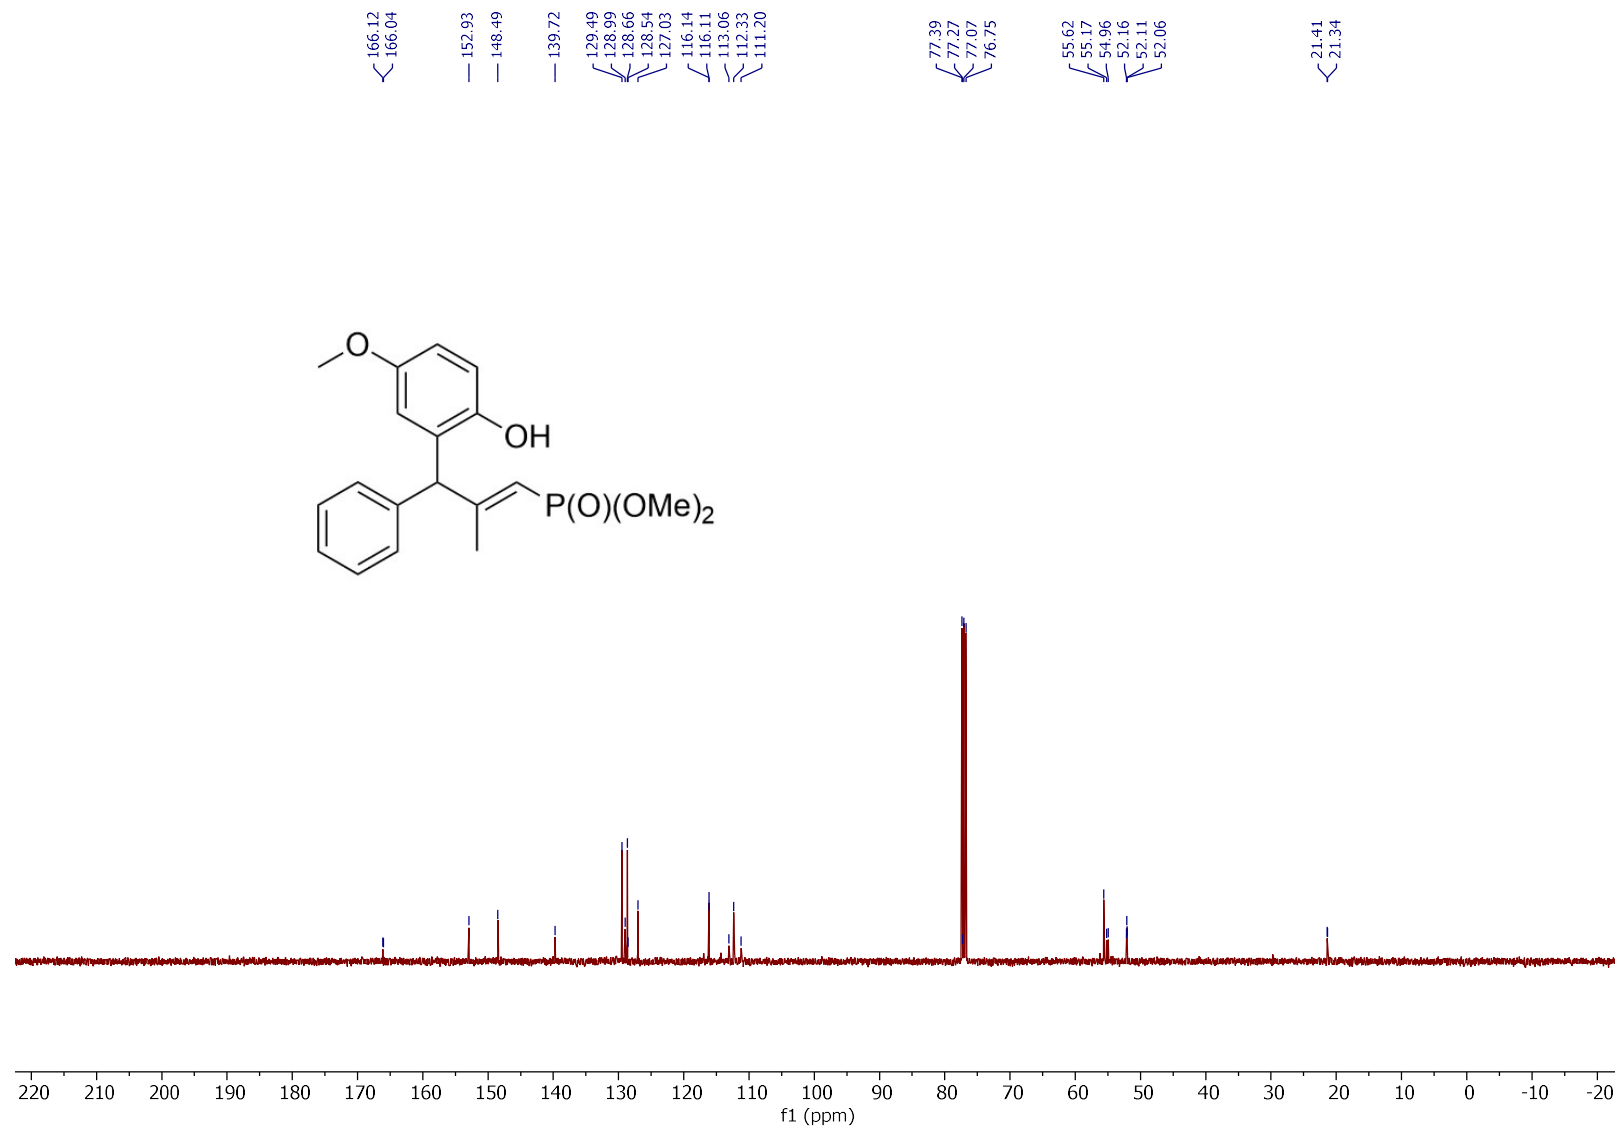

Figure S80:  $^{13}\text{C}\{^1\text{H}\}$  NMR Spectra of 3u in  $\text{CDCl}_3$

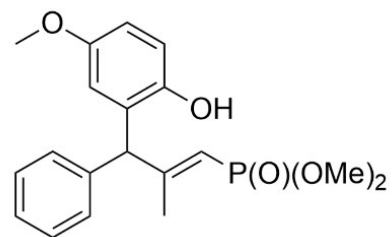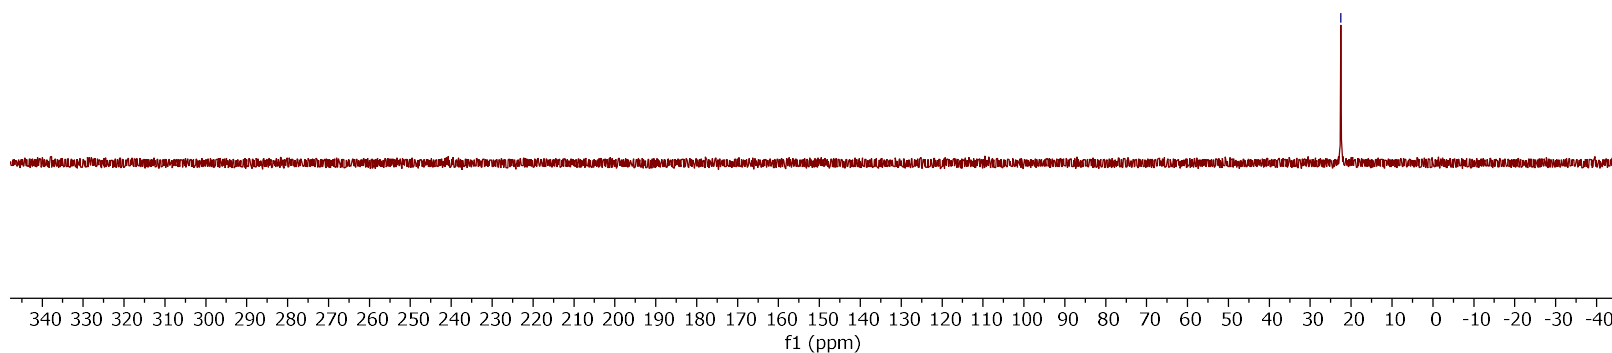

Figure S81:  $^{31}\text{P}\{^1\text{H}\}$  NMR Spectra of 3u in  $\text{CDCl}_3$

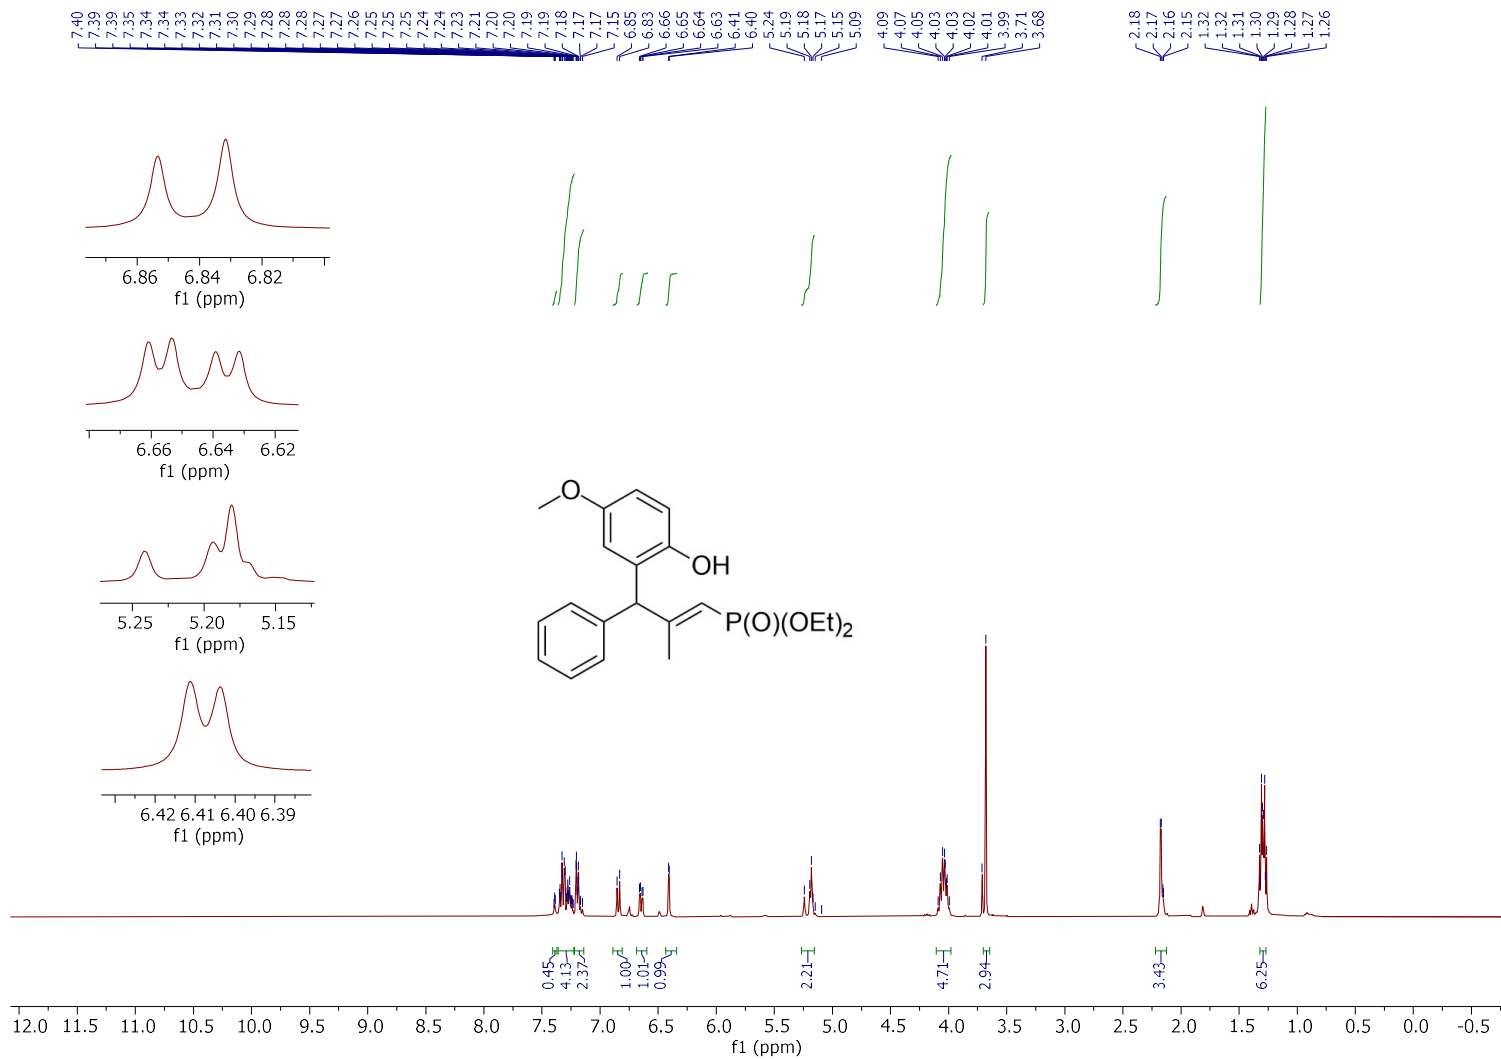

Figure S82:  $^1\text{H}$  NMR Spectra of 3v in  $\text{CDCl}_3$

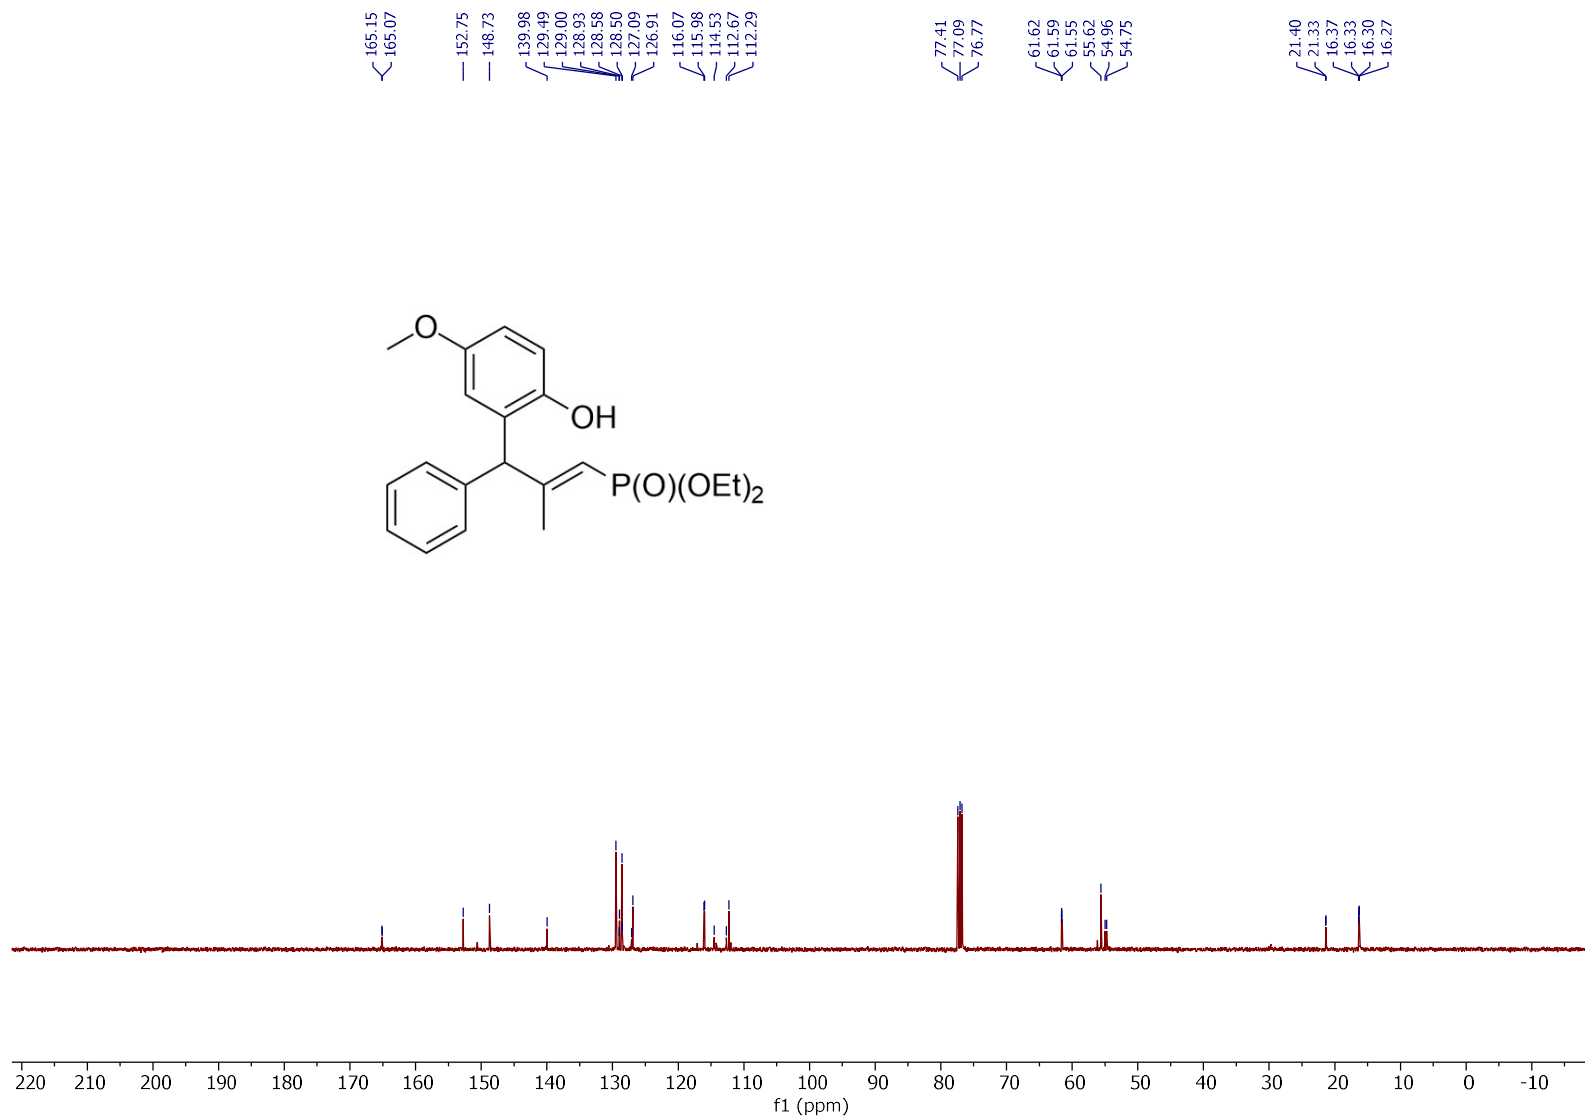

Figure S83:  $^{13}\text{C}\{^1\text{H}\}$  NMR Spectra of 3v in  $\text{CDCl}_3$

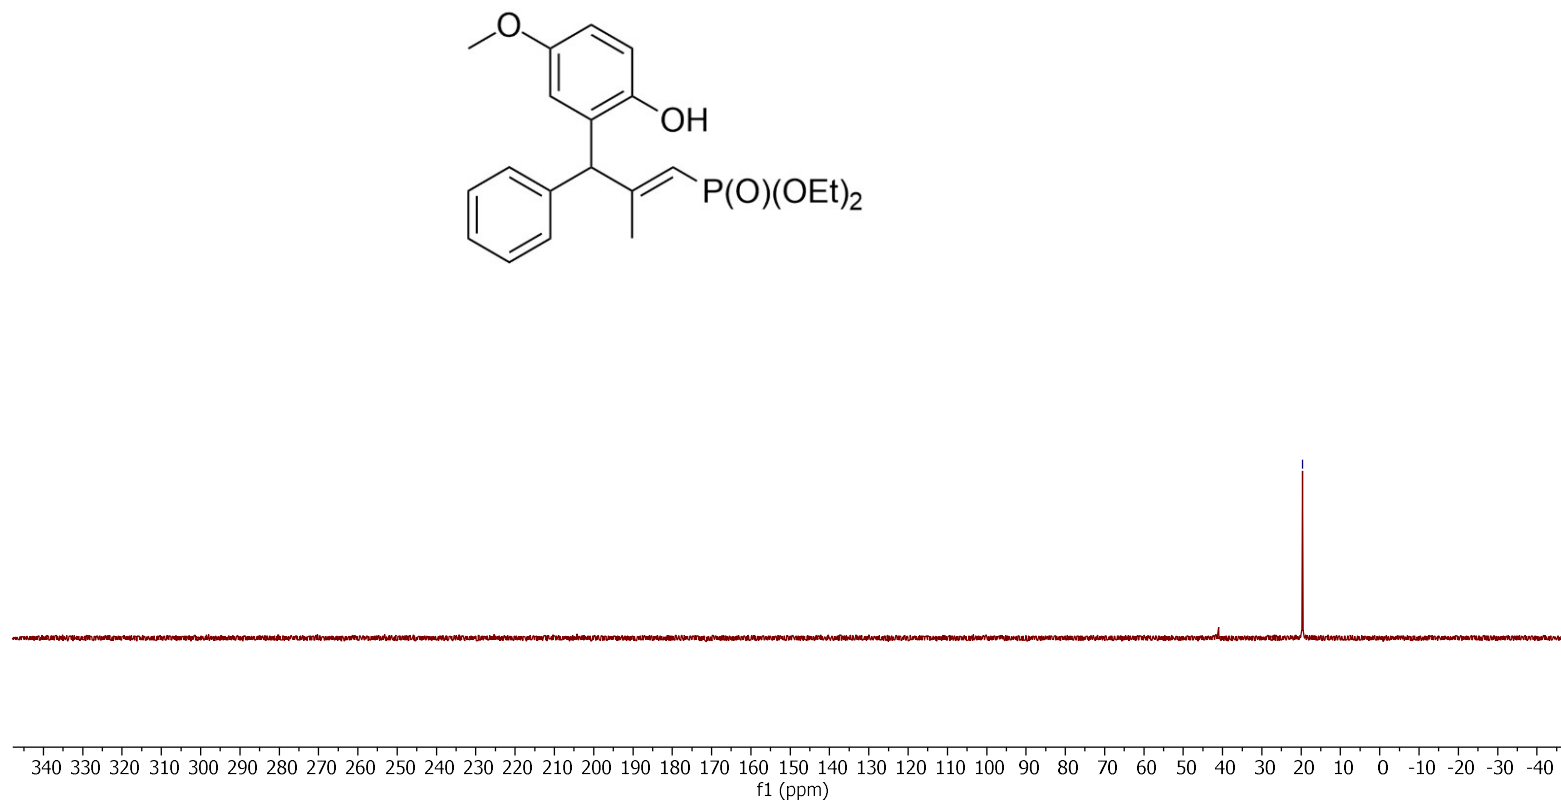

**Figure S84:**  $^{31}\text{P}\{^1\text{H}\}$  NMR Spectra of **3v** in  $\text{CDCl}_3$

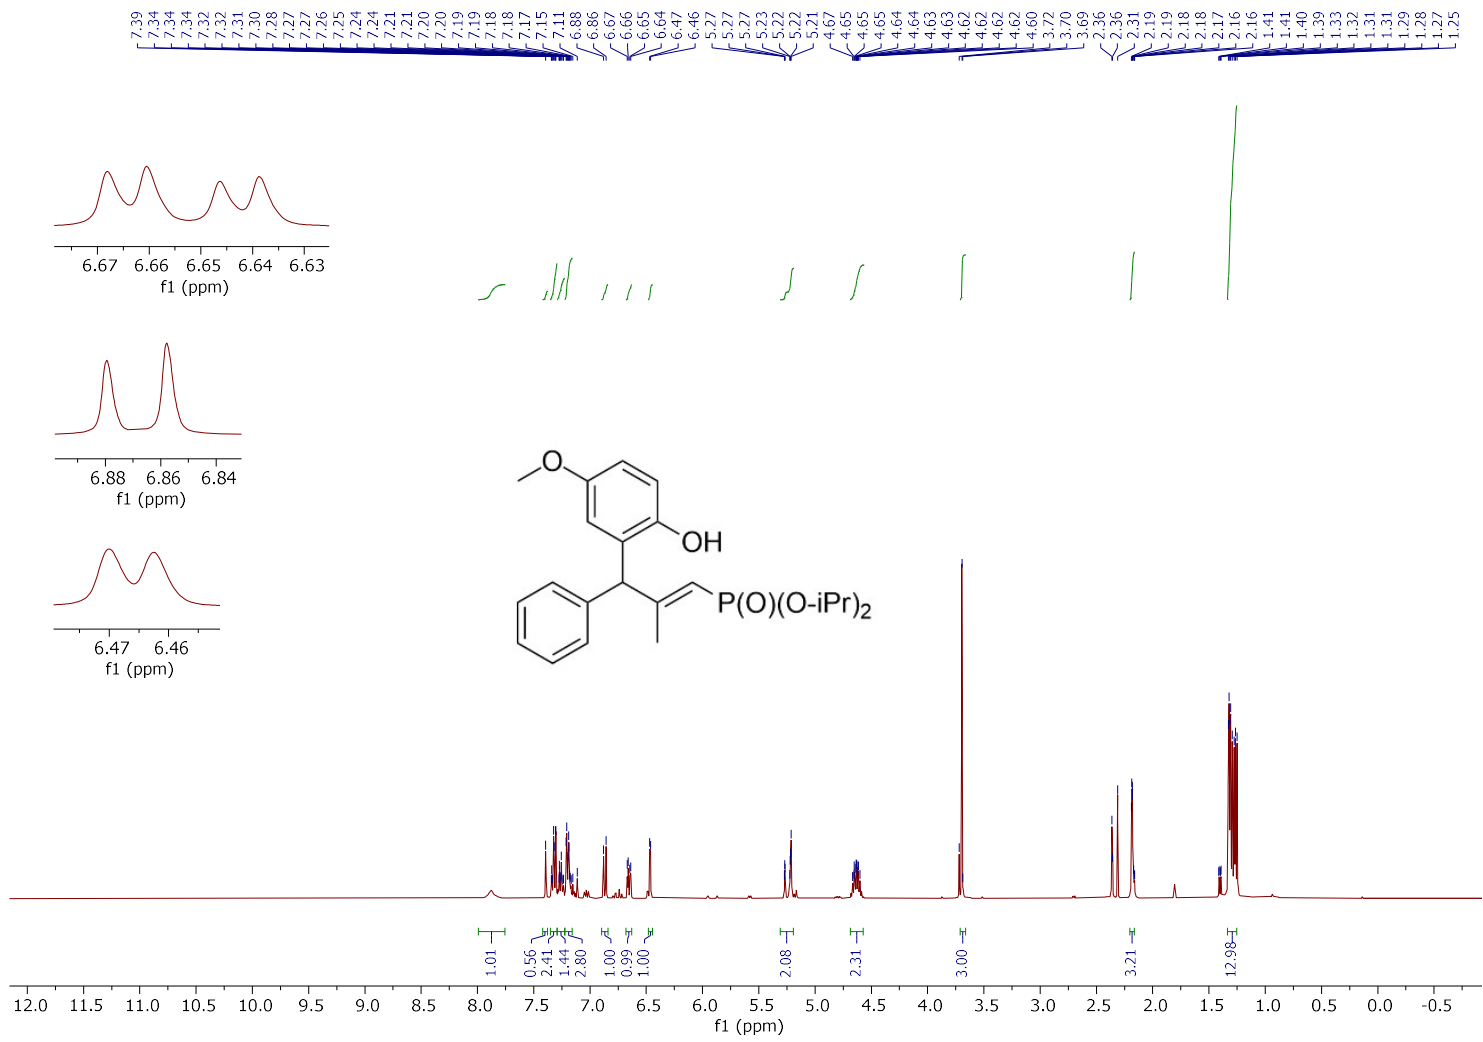

Figure S85:  $^1\text{H}$  NMR Spectra of 3w in  $\text{CDCl}_3$

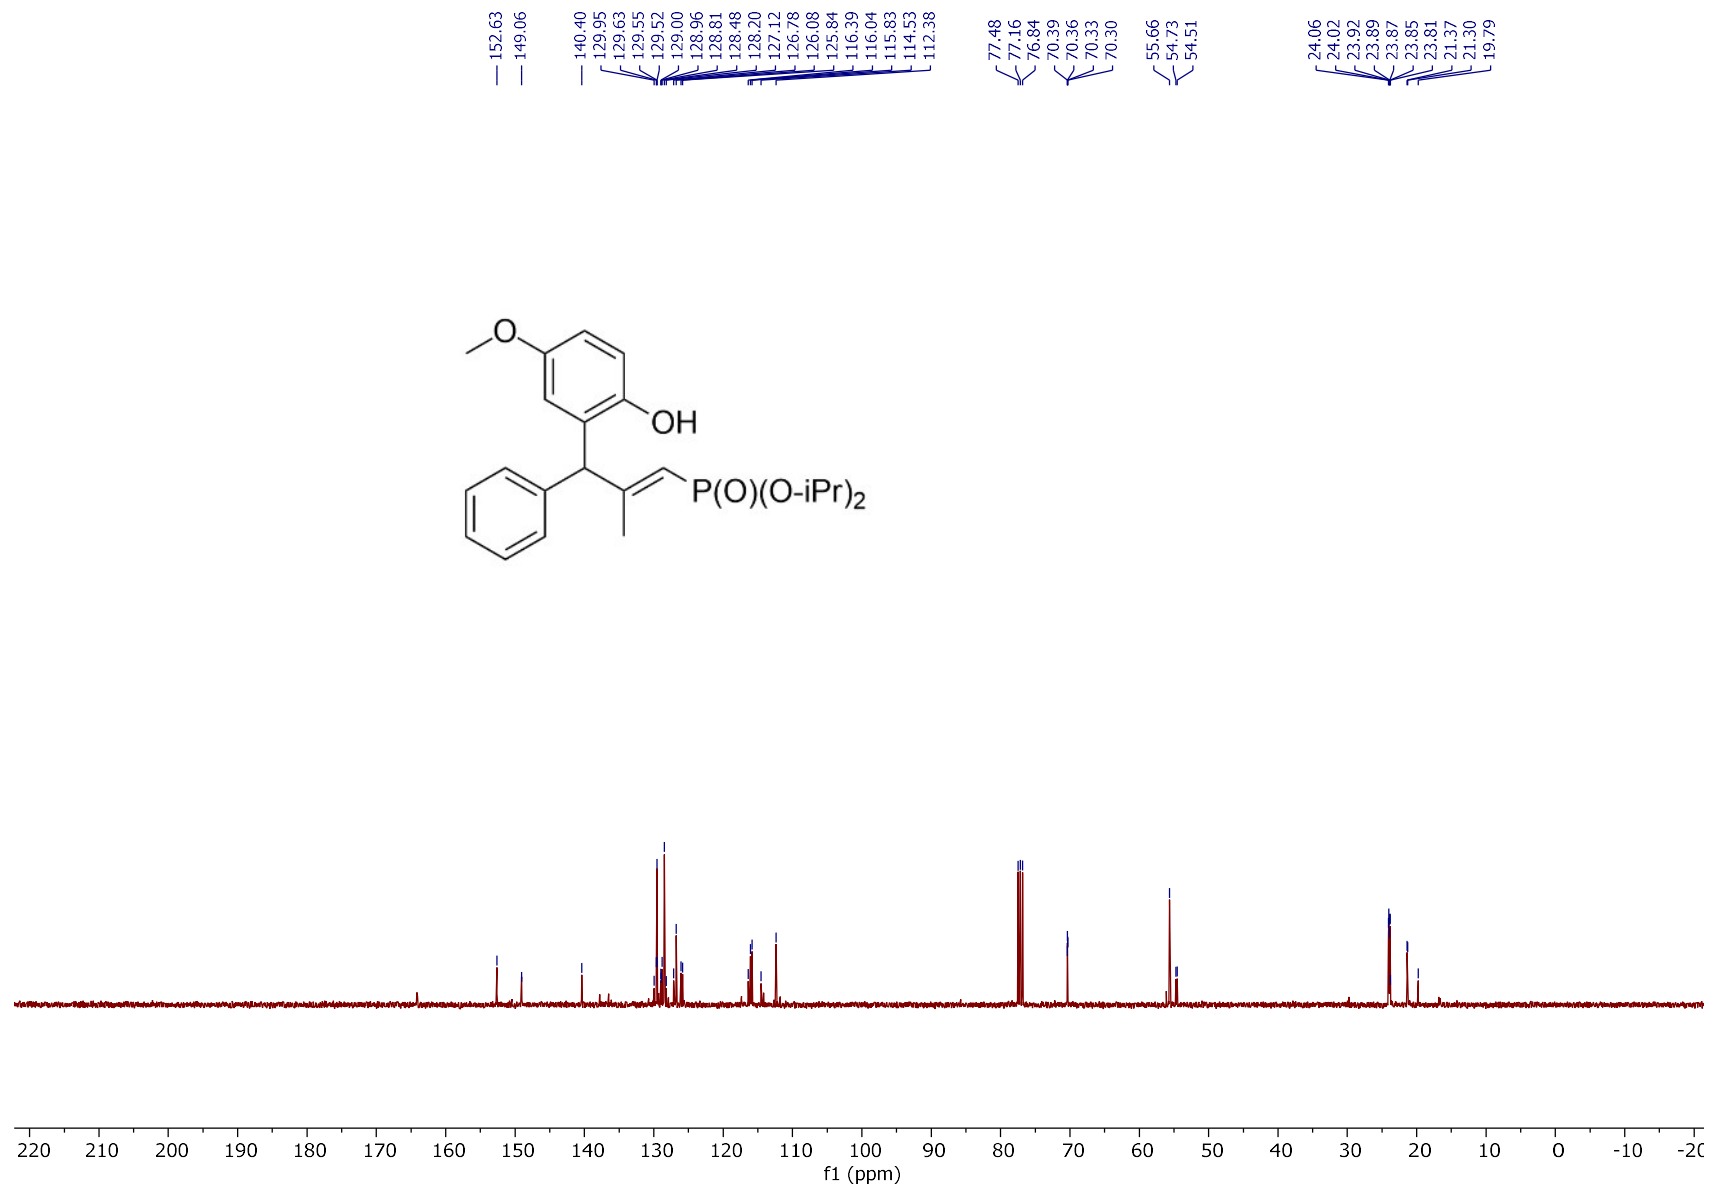

Figure S86:  $^{13}\text{C}\{^1\text{H}\}$  NMR Spectra of 3w in  $\text{CDCl}_3$

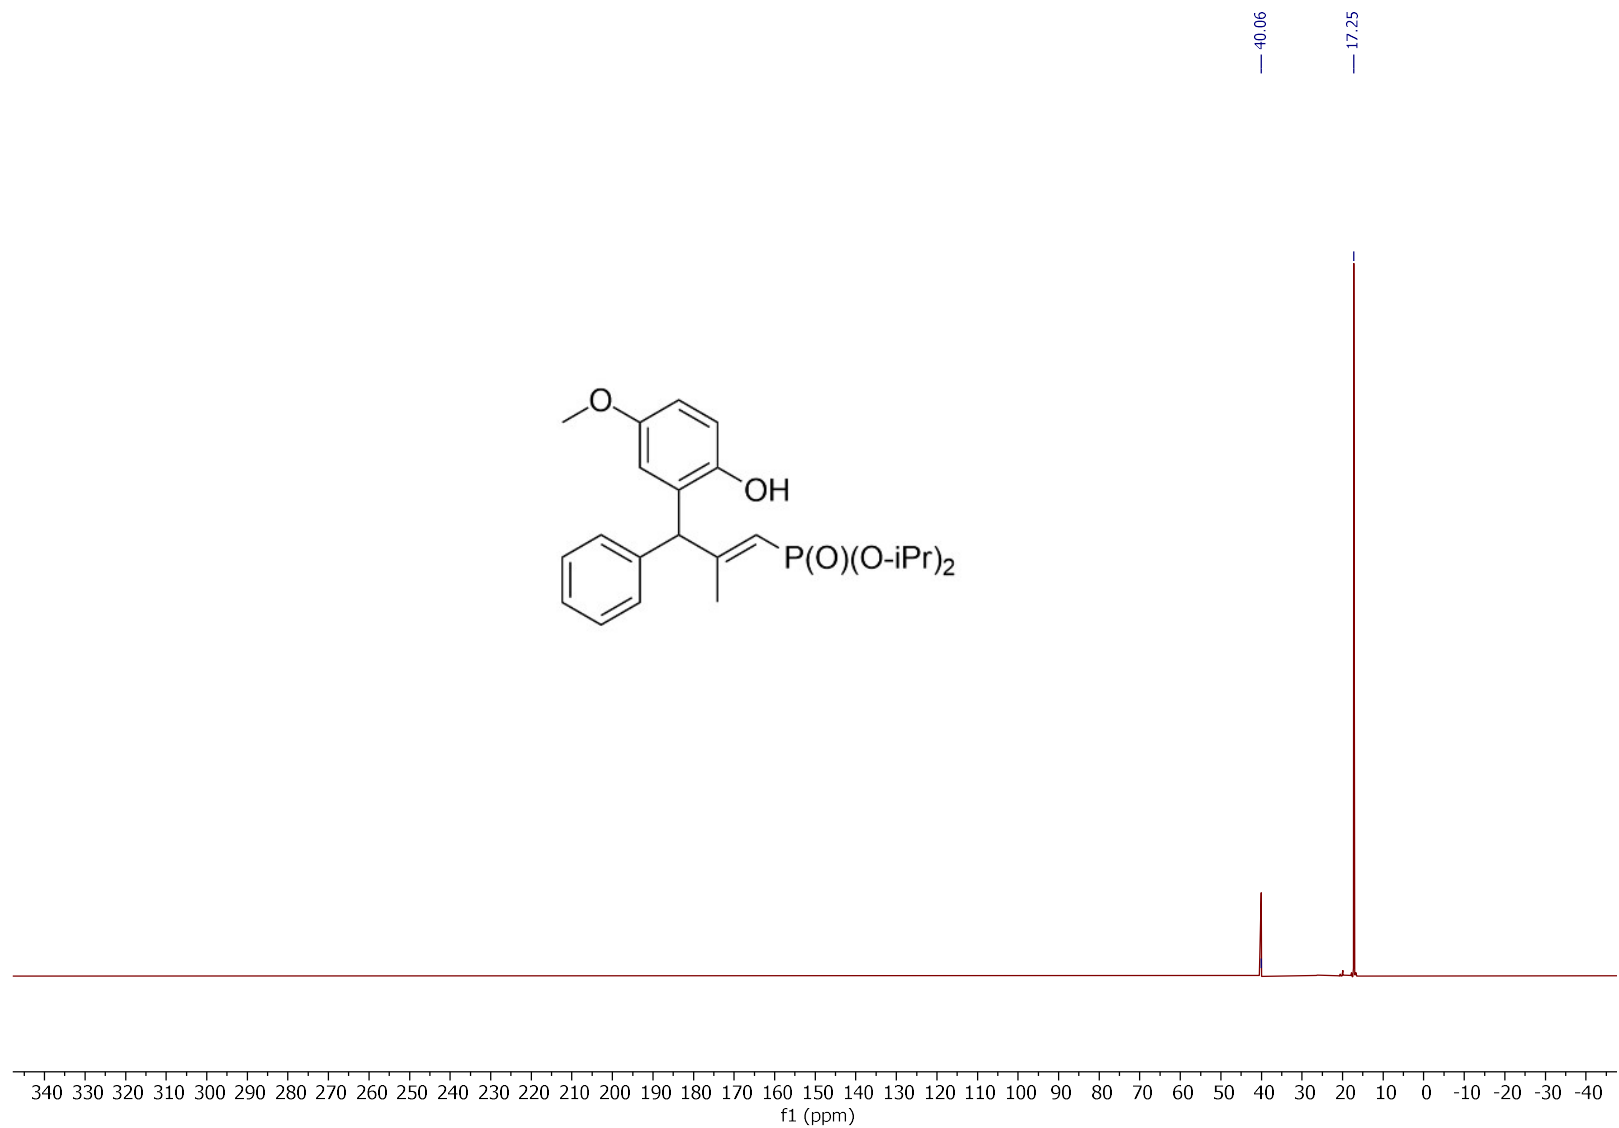

Figure S87:  $^{31}\text{P}\{^1\text{H}\}$  NMR Spectra of 3w in  $\text{CDCl}_3$

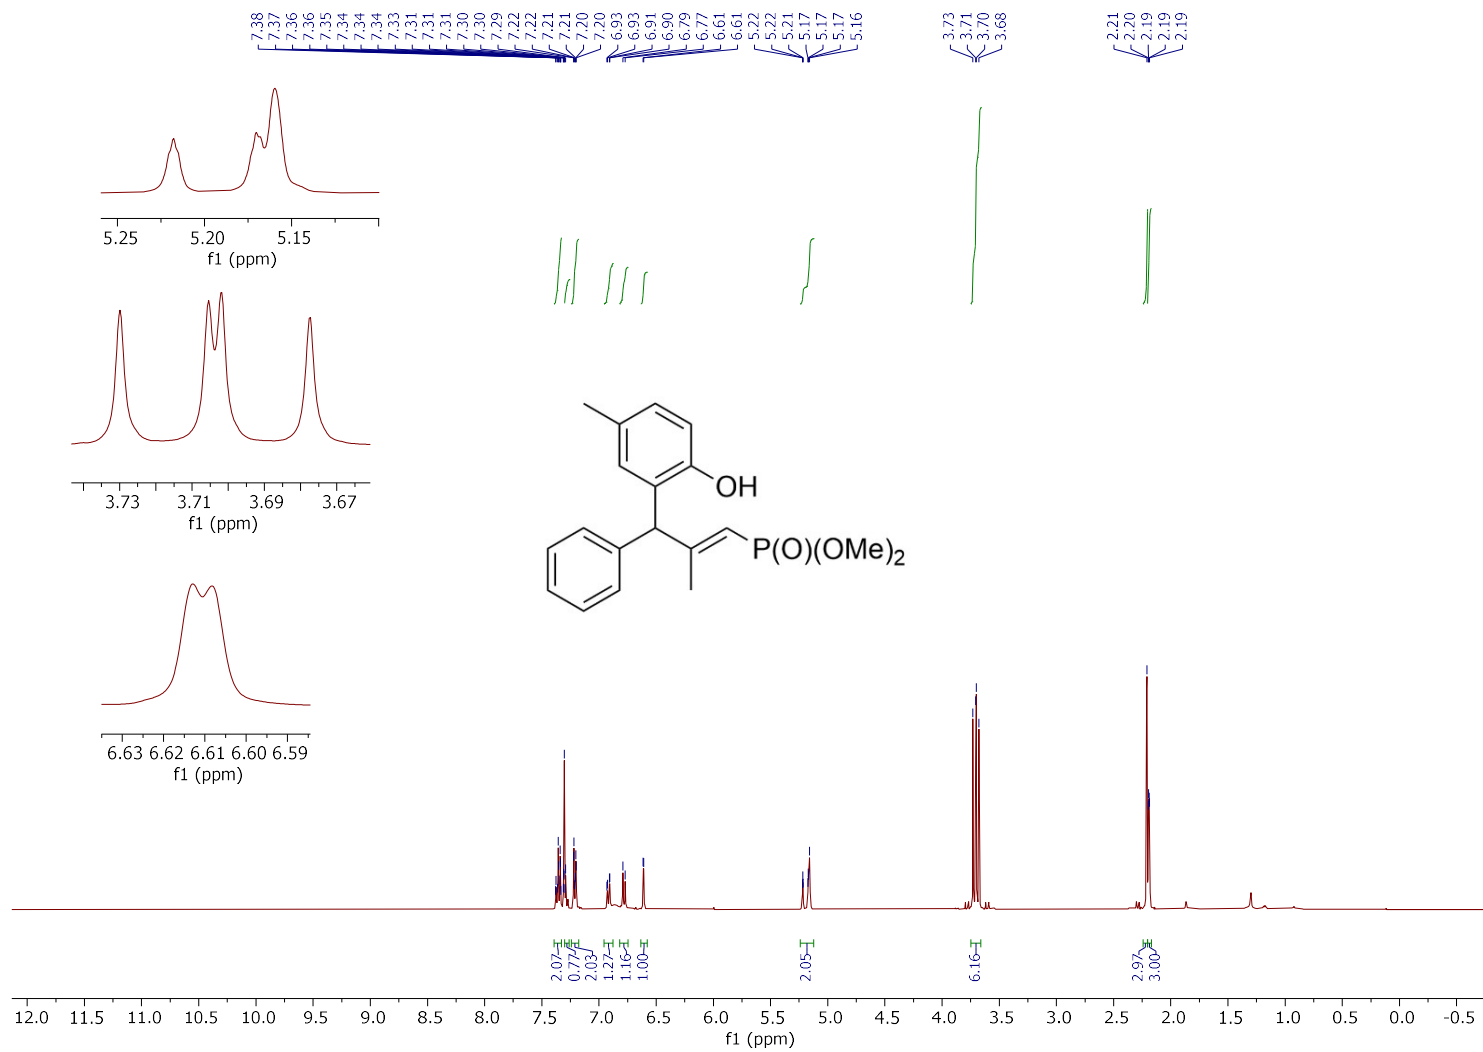

Figure S88:  $^1\text{H}$  NMR Spectra of 3r in  $\text{CDCl}_3$

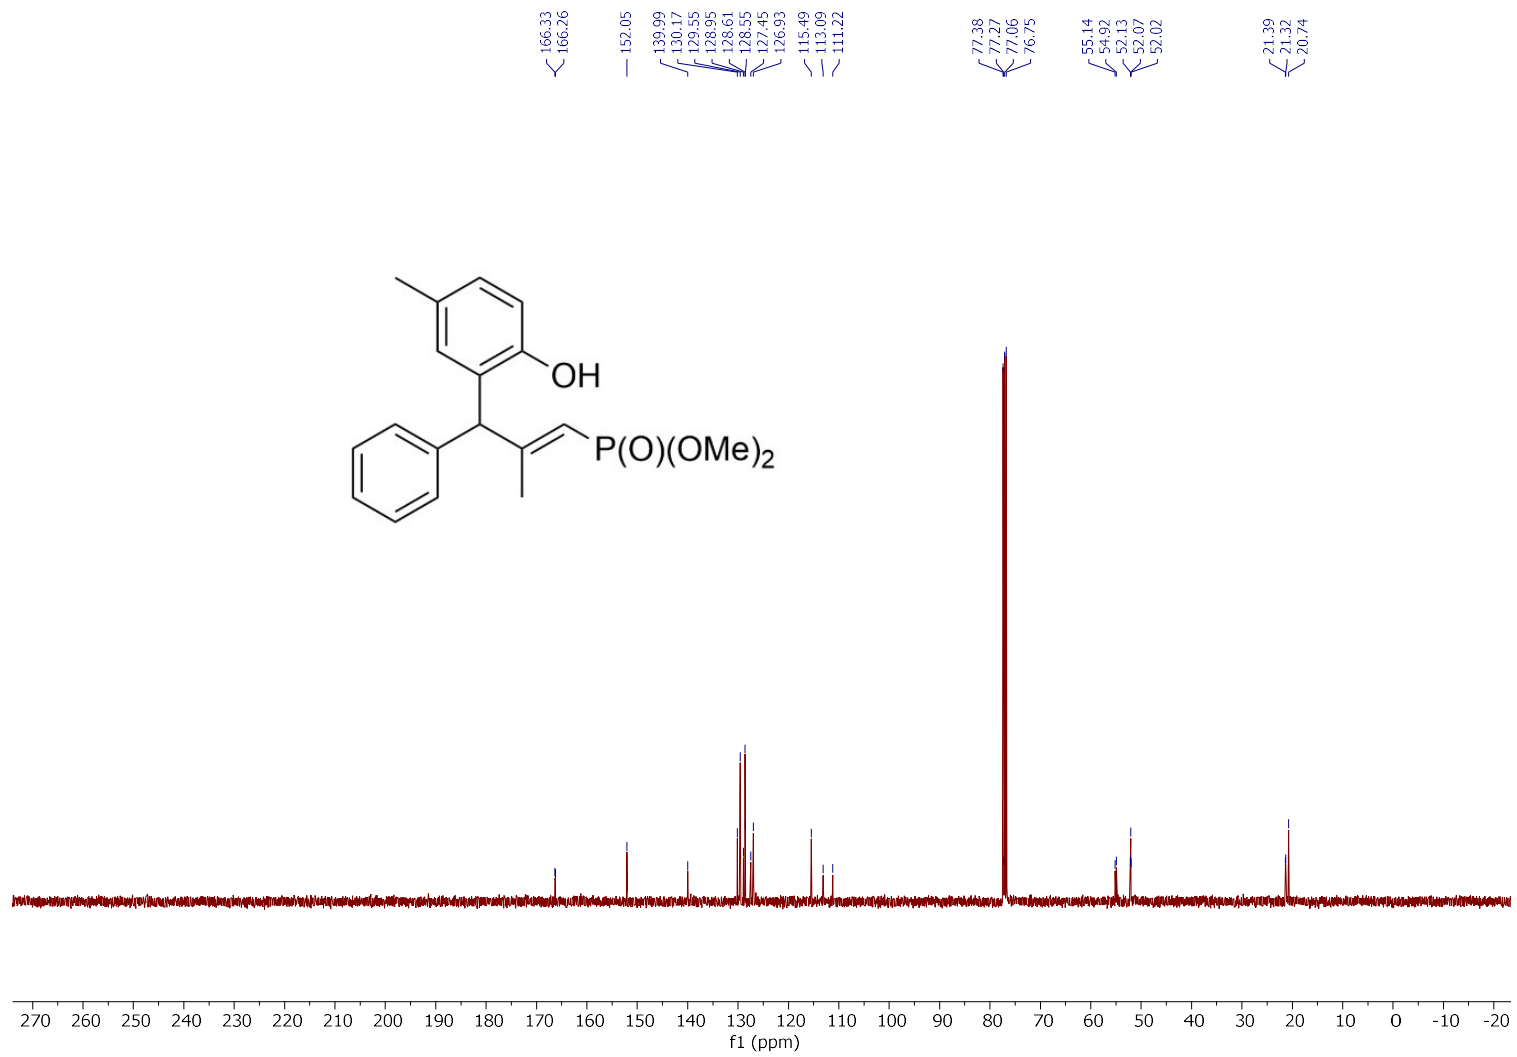

Figure S89:  $^{13}\text{C}\{^1\text{H}\}$  NMR Spectra of 3r in  $\text{CDCl}_3$

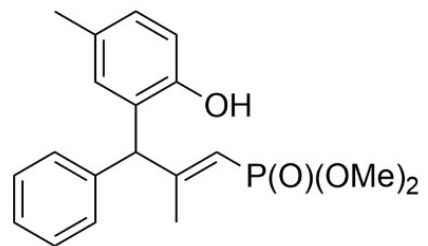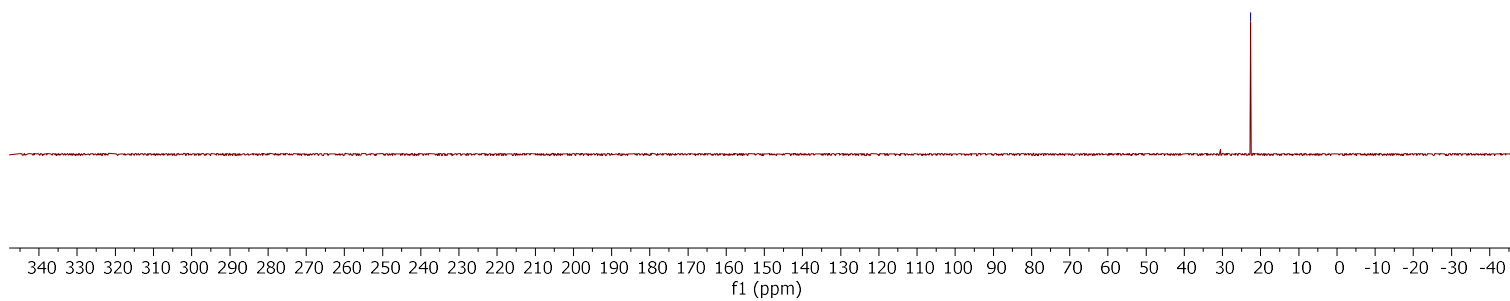

**Figure S90:**  $^{31}\text{P}\{^1\text{H}\}$  NMR Spectra of 3r in  $\text{CDCl}_3$



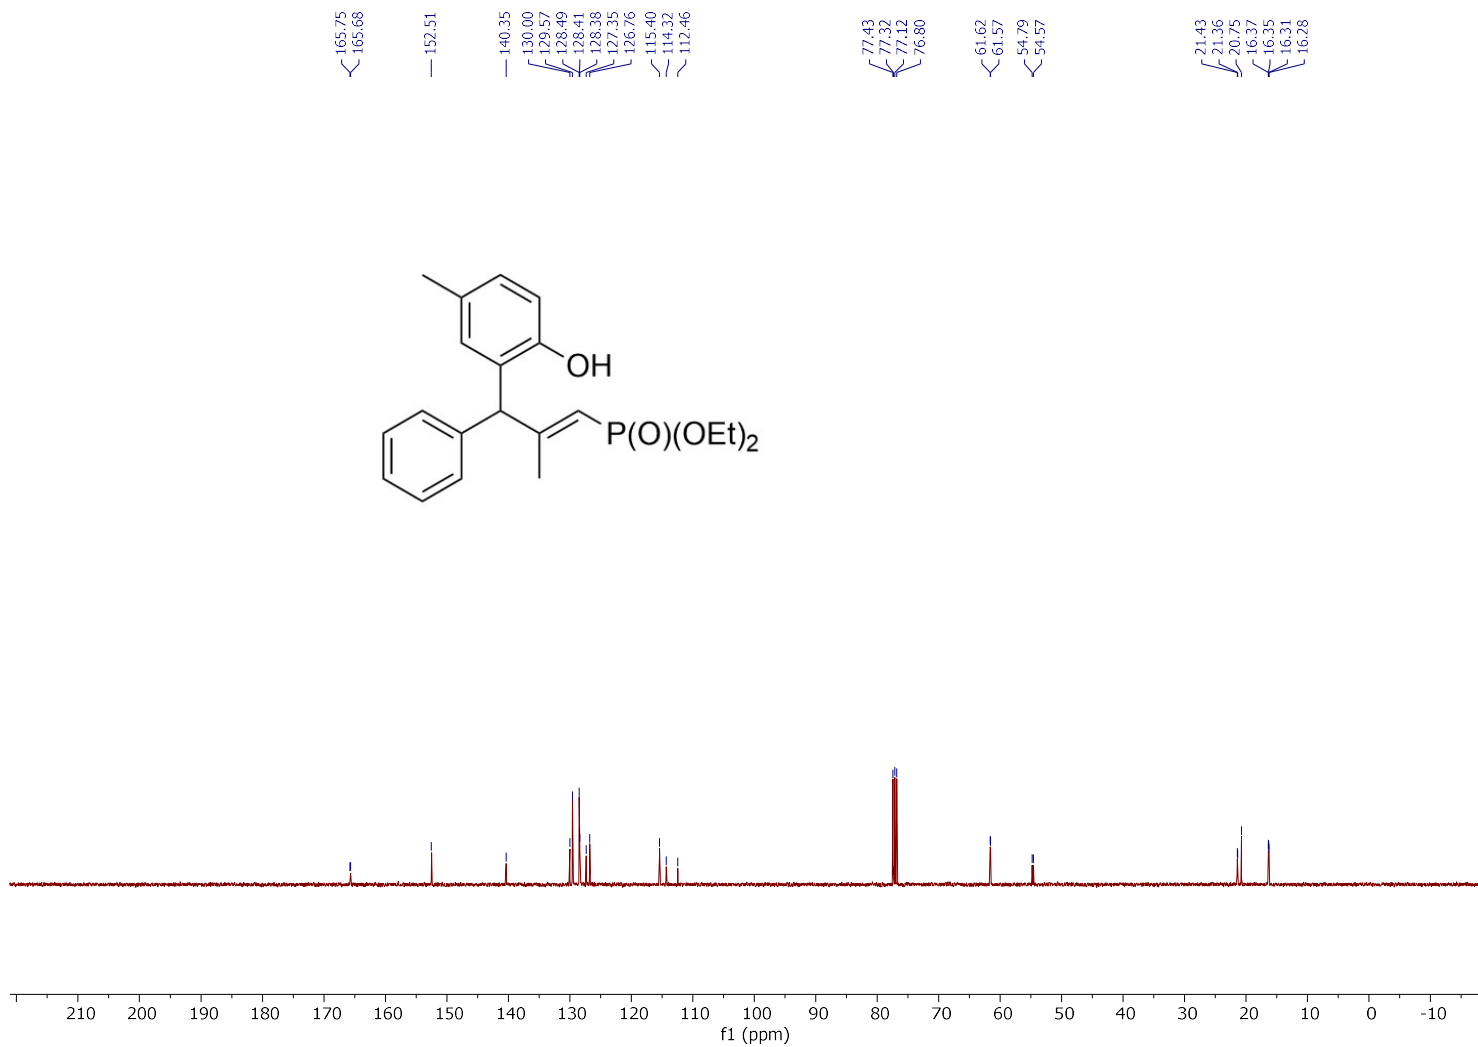

Figure S92:  $^{13}\text{C}\{^1\text{H}\}$  NMR Spectra of 3s in  $\text{CDCl}_3$

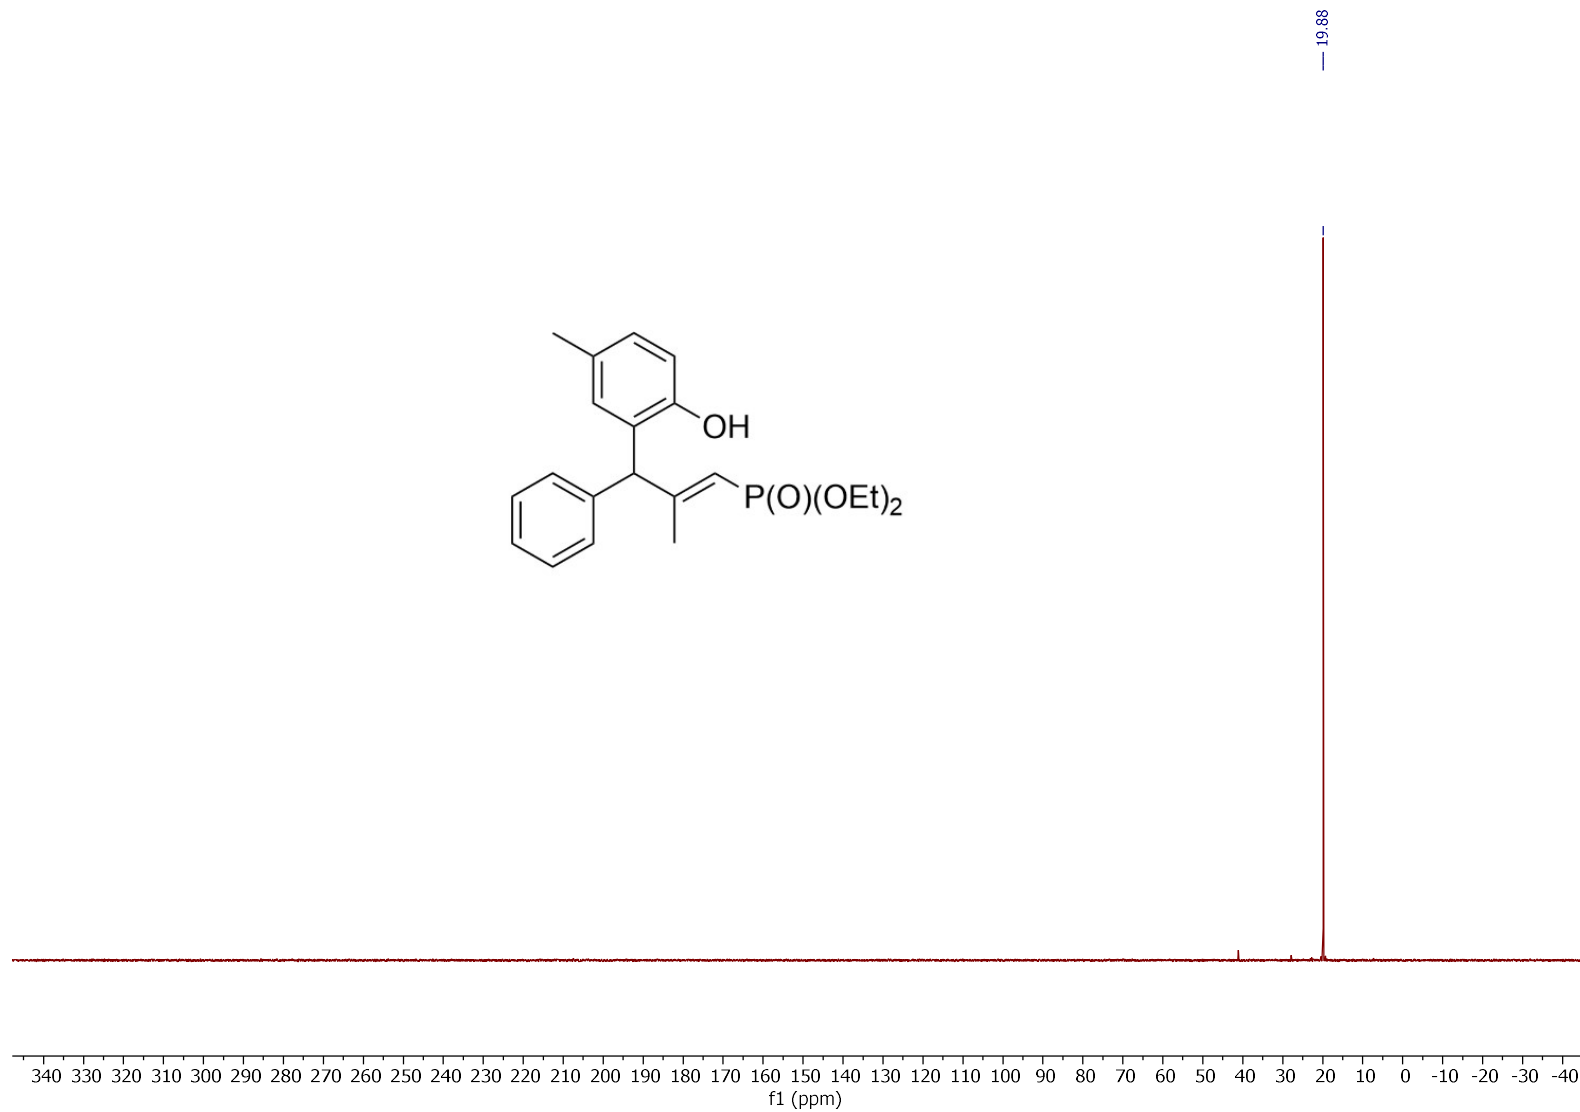

Figure S93:  $^{31}\text{P}\{^1\text{H}\}$  NMR Spectra of 3s in  $\text{CDCl}_3$

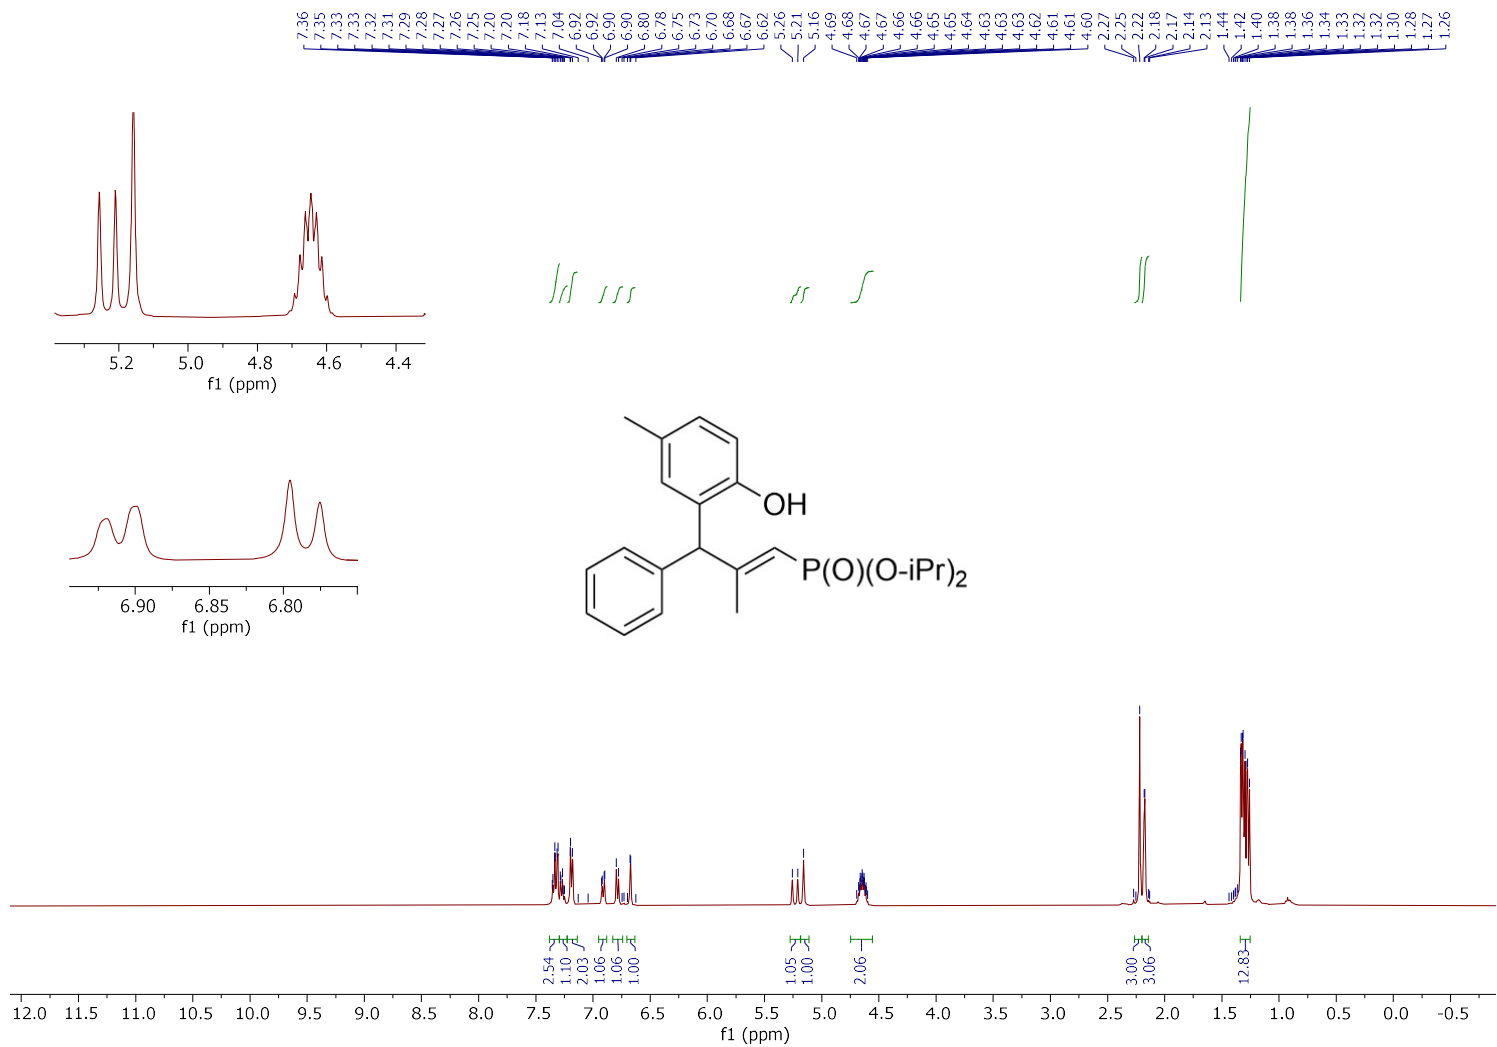

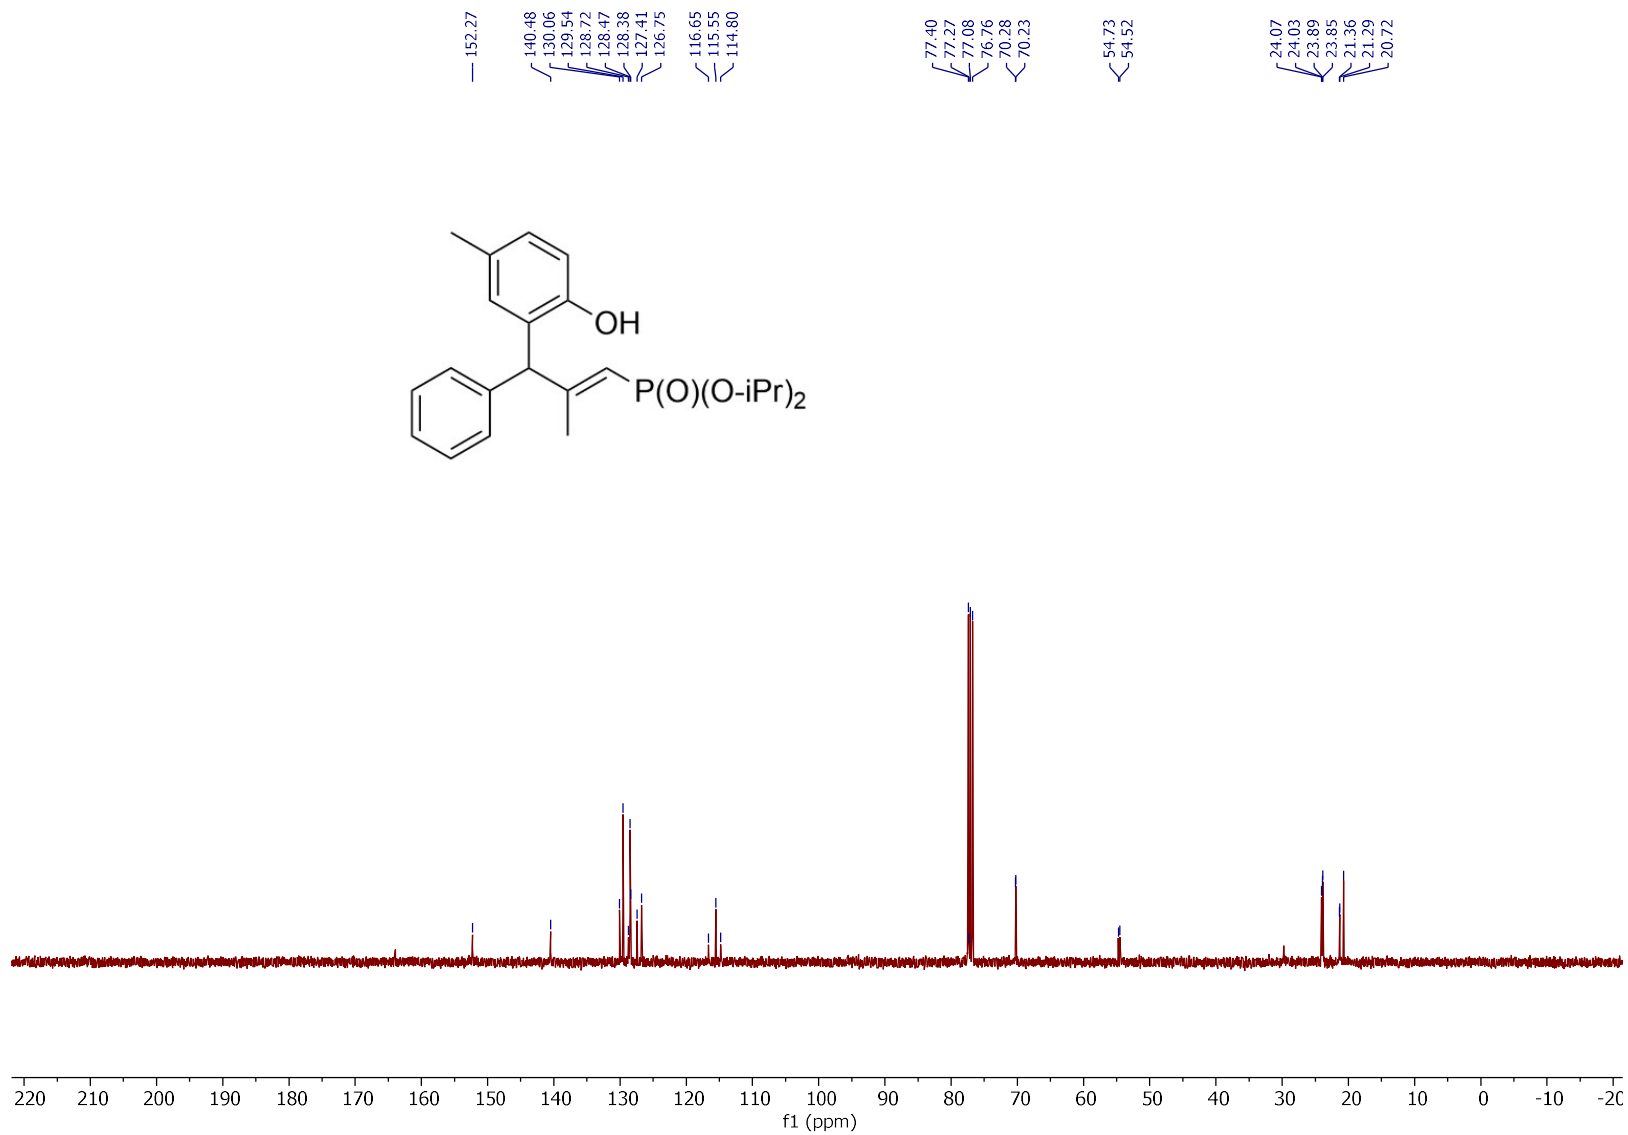

Figure S95:  $^{13}\text{C}\{^1\text{H}\}$  NMR Spectra of 3t in  $\text{CDCl}_3$

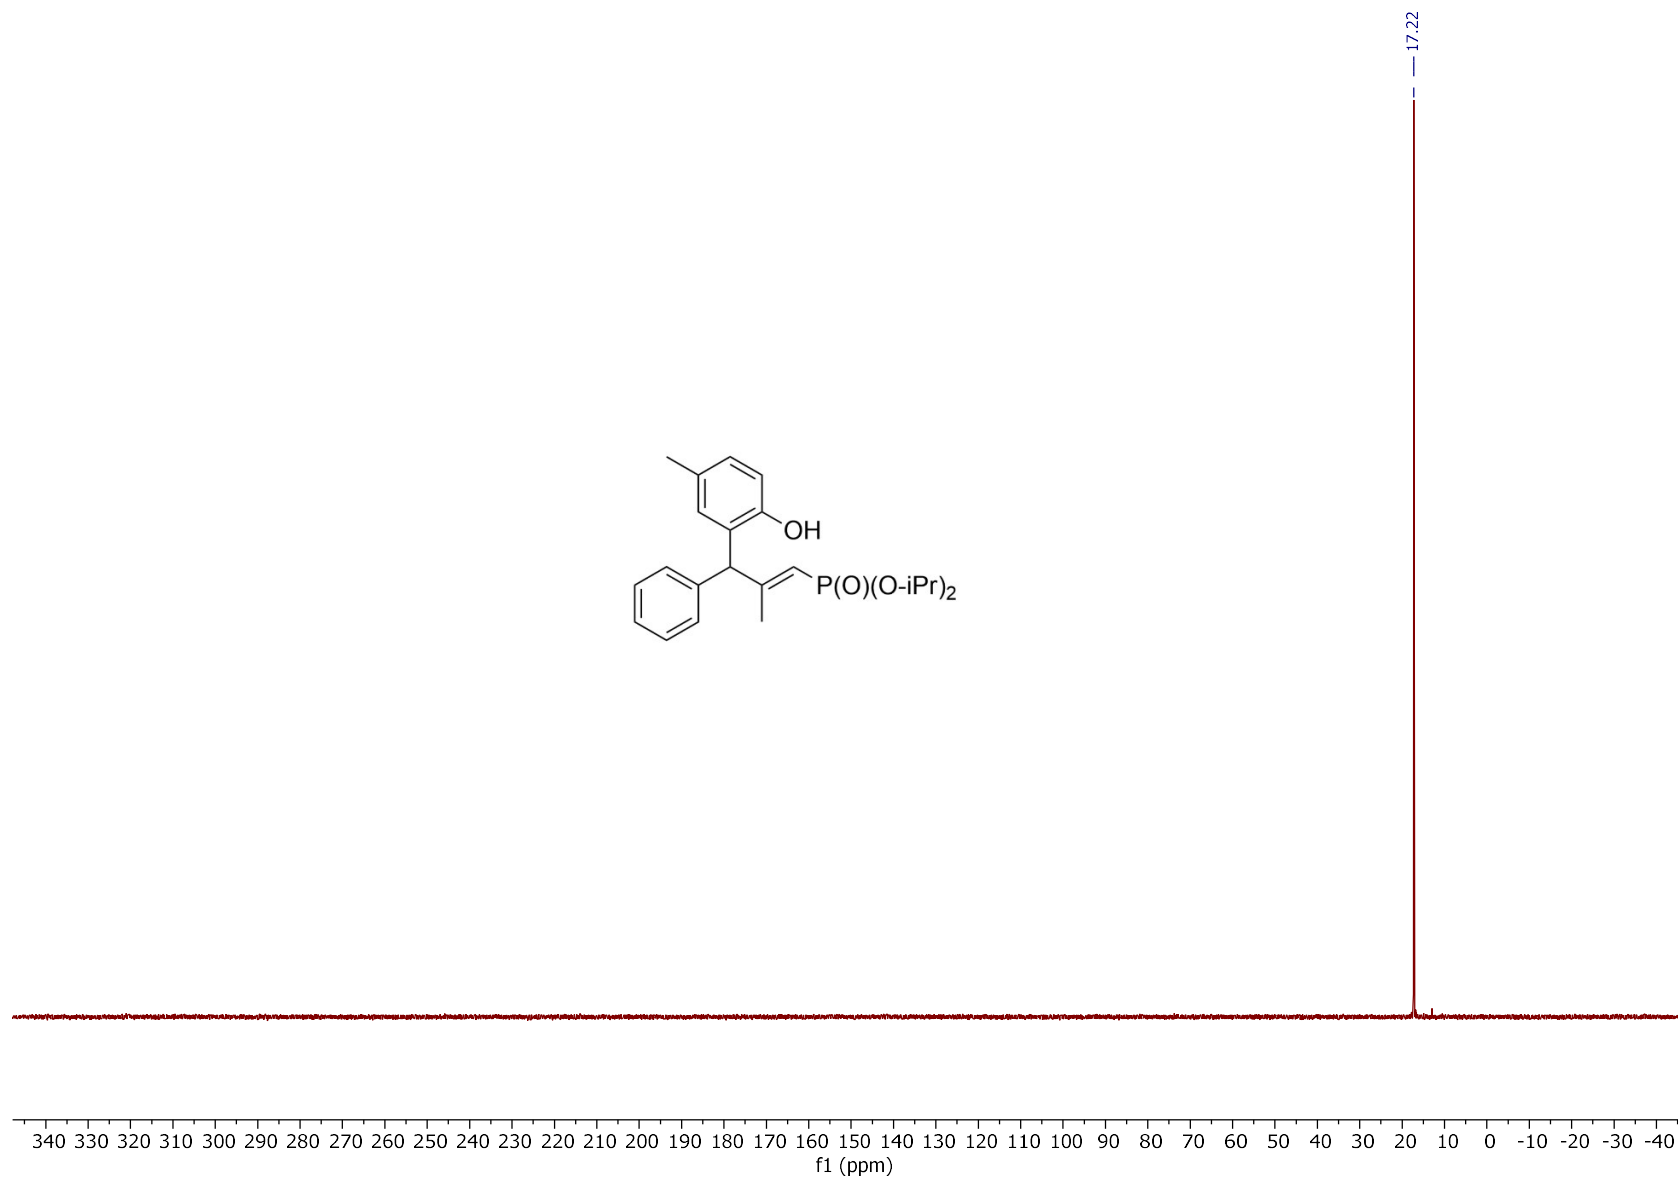

**Figure S96:**  $^{31}\text{P}\{^1\text{H}\}$  NMR Spectra of **3t** in  $\text{CDCl}_3$

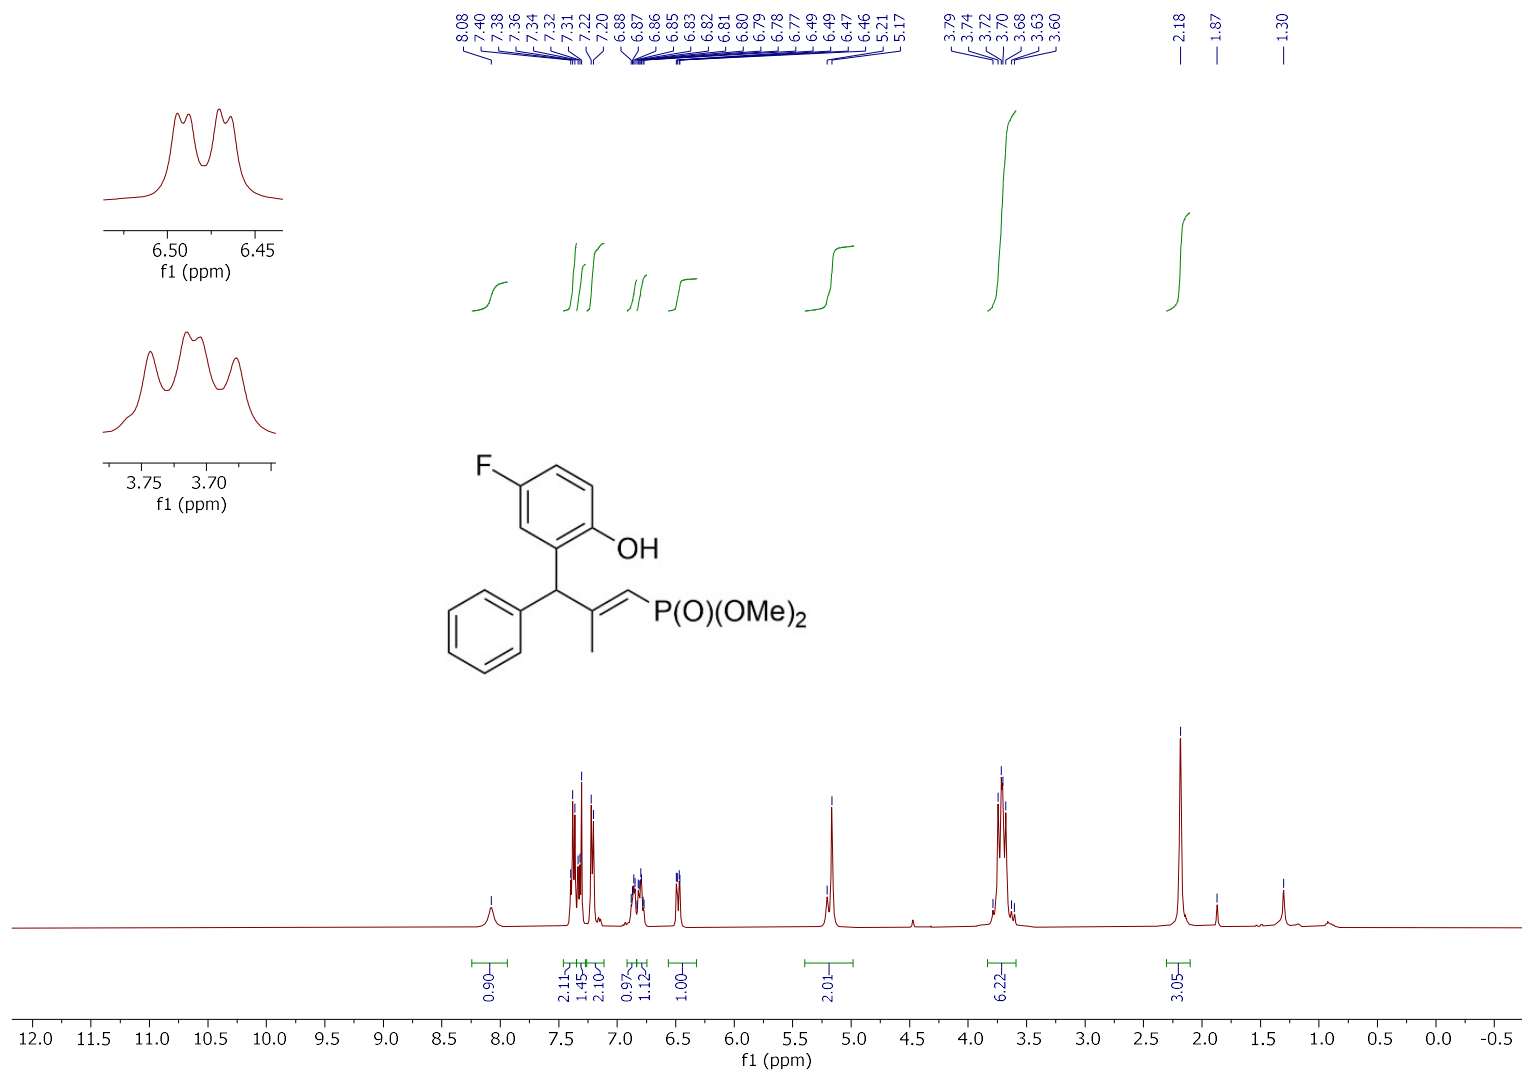

Figure S97:  $^1\text{H}$  NMR Spectra of 3x in  $\text{CDCl}_3$

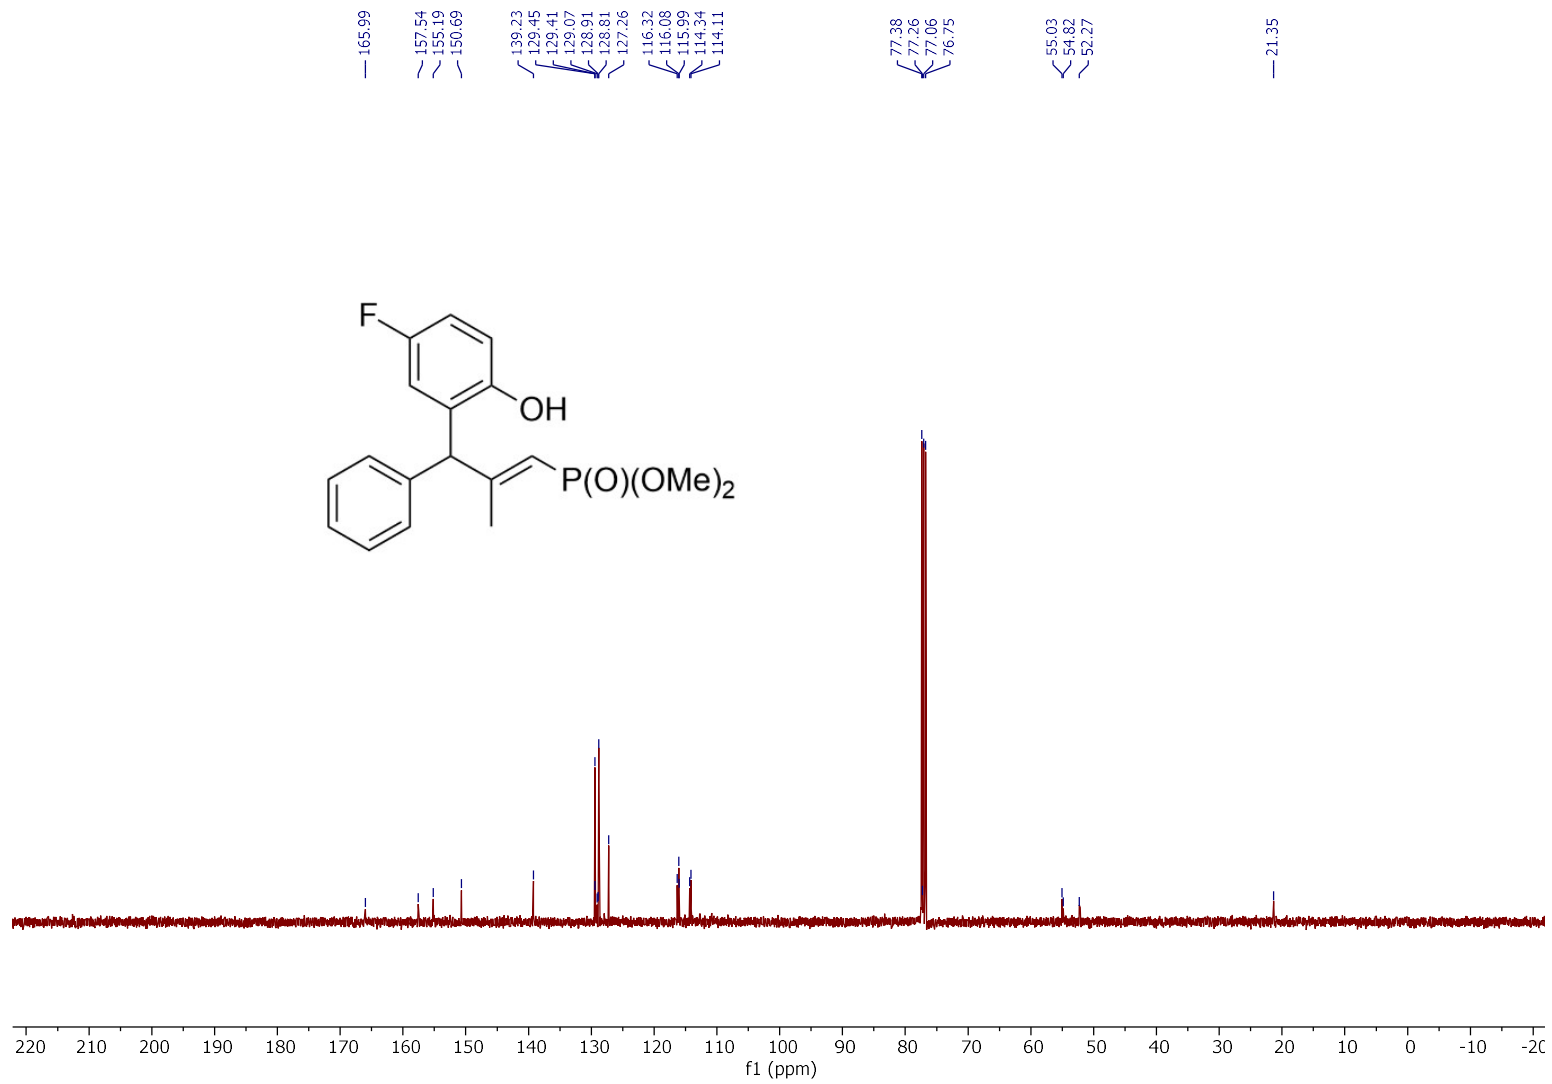

Figure S98:  $^{13}\text{C}\{^1\text{H}\}$  NMR Spectra of 3x in  $\text{CDCl}_3$

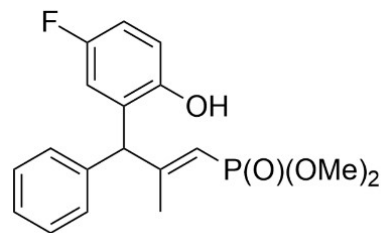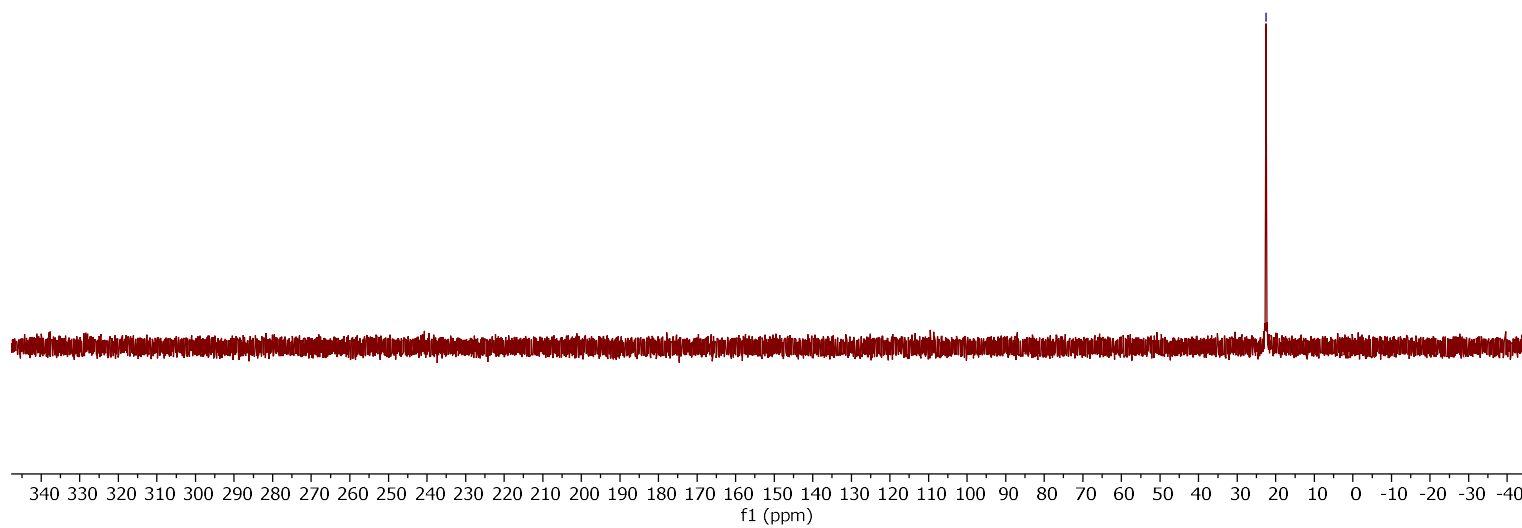

**Figure S99:** <sup>31</sup>P{<sup>1</sup>H} NMR Spectra of 3x in CDCl<sub>3</sub>

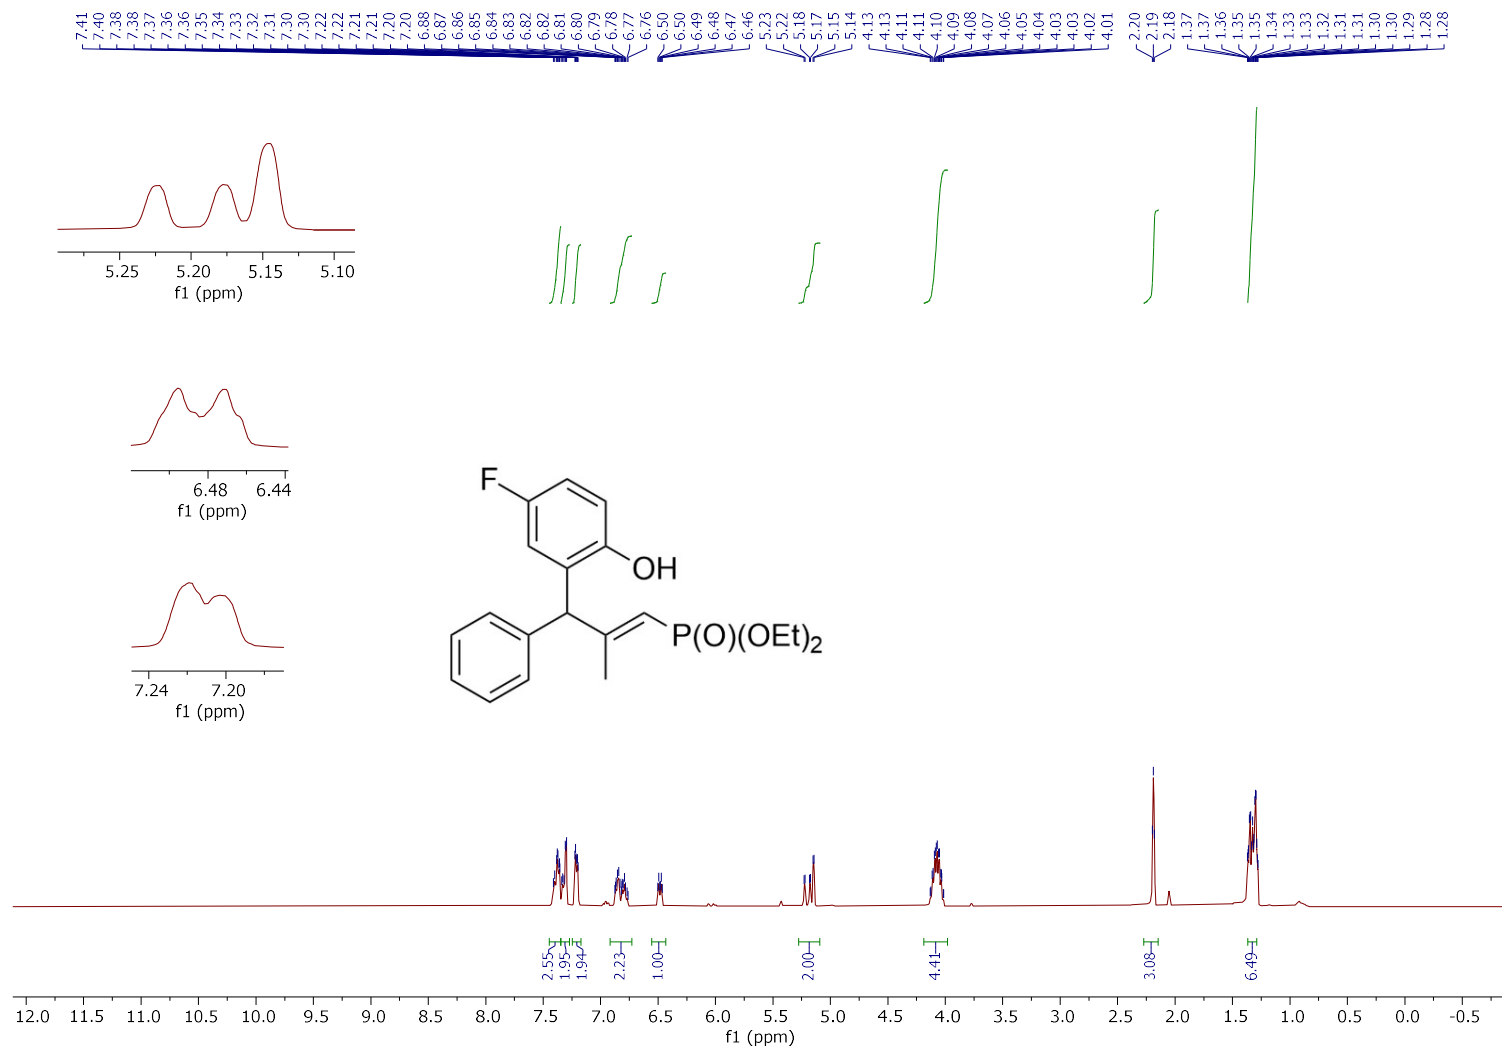

Figure S100:  $^1\text{H}$  NMR Spectra of 3y in  $\text{CDCl}_3$

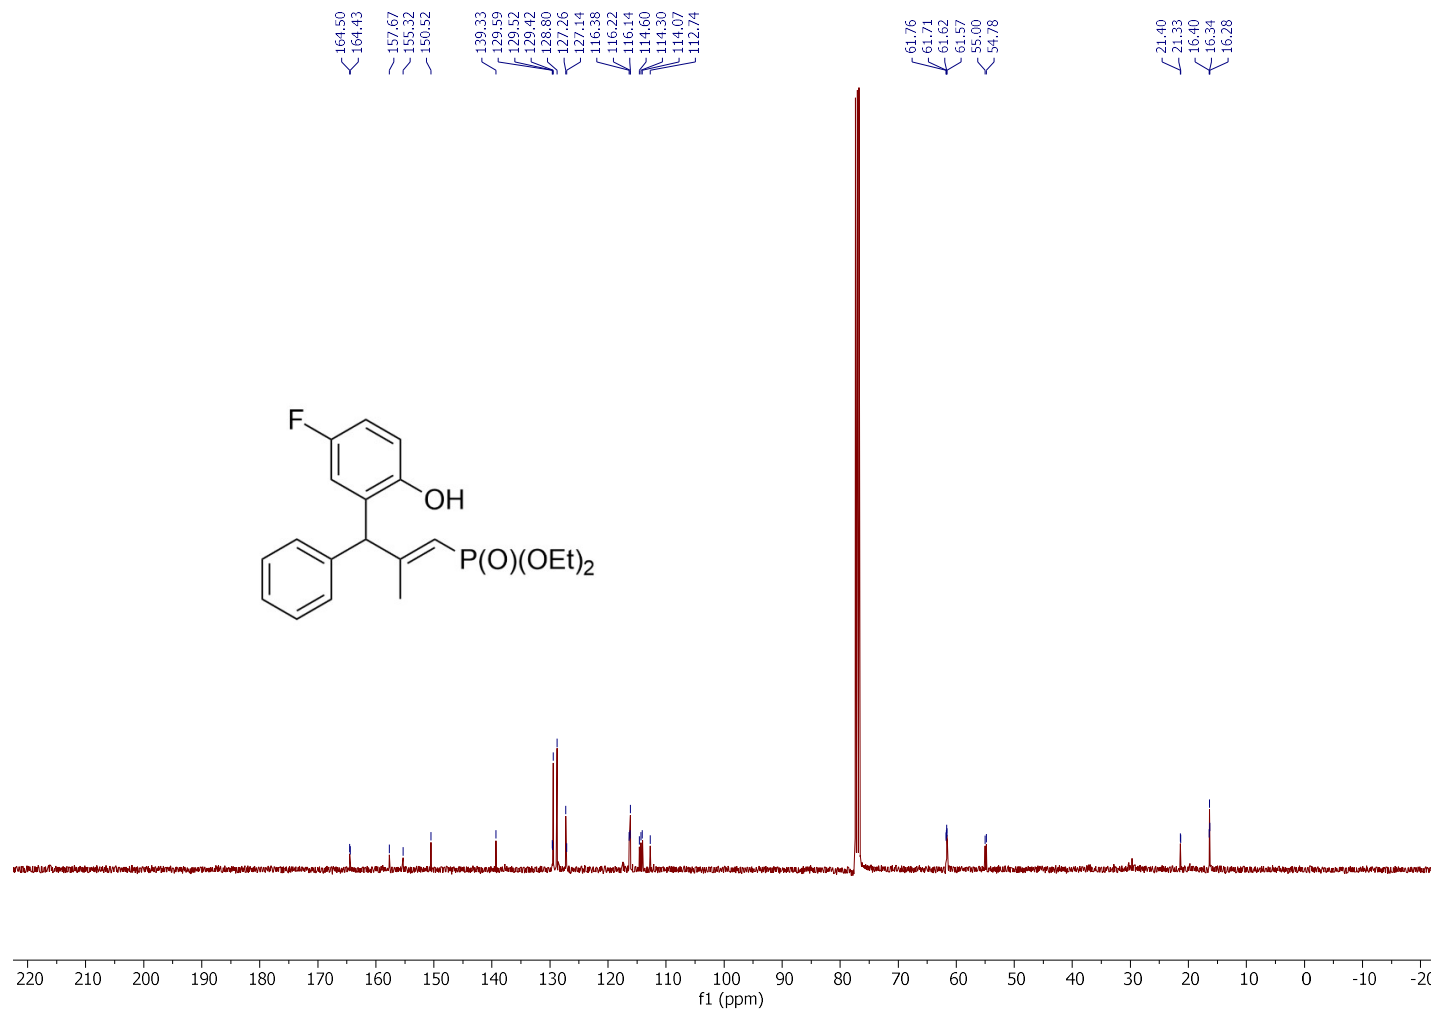

Figure S101:  $^{13}\text{C}\{^1\text{H}\}$  NMR Spectra of 3y in  $\text{CDCl}_3$

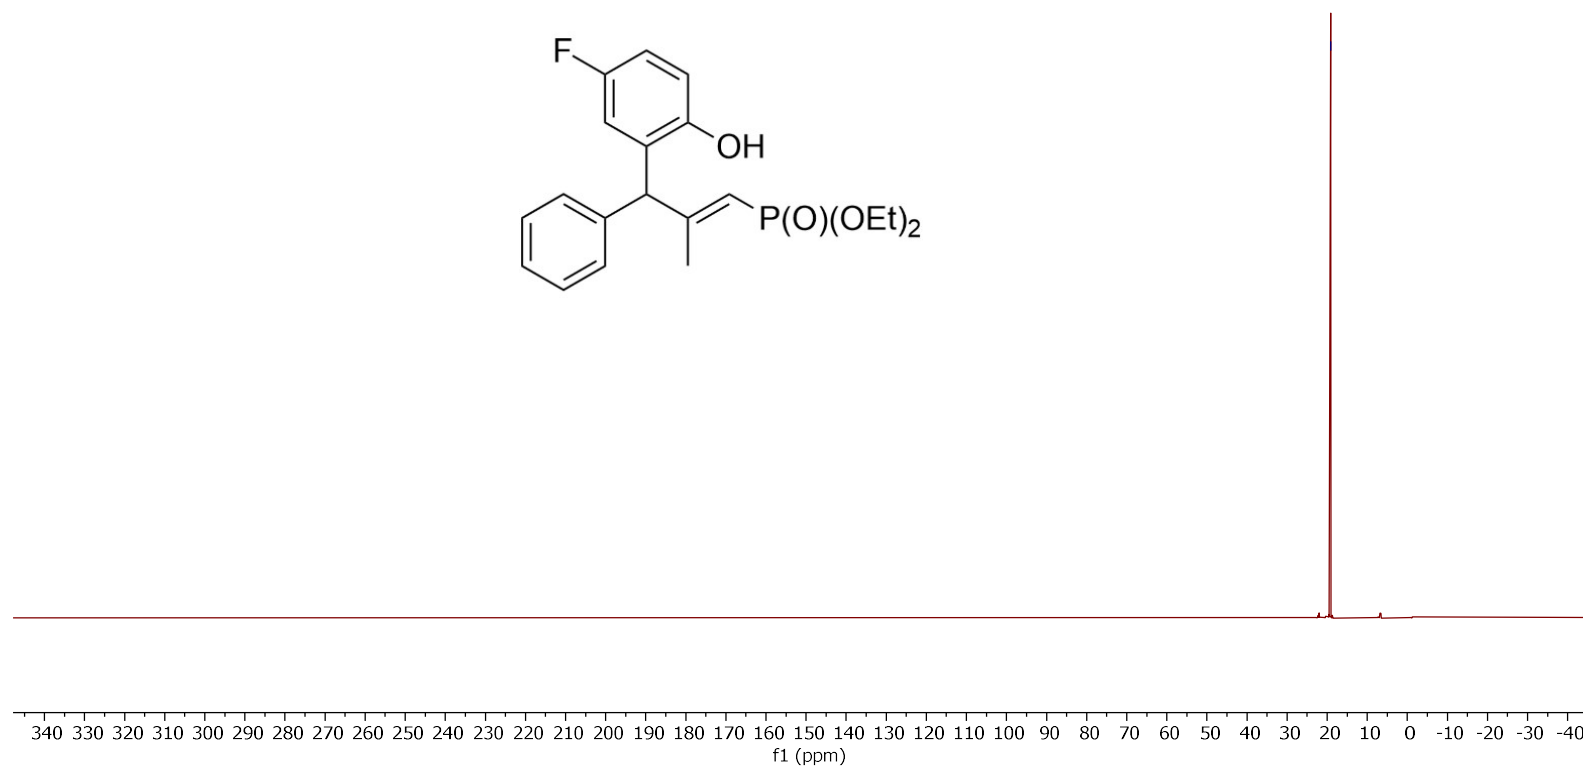

**Figure S102:  $^{31}\text{P}$  NMR Spectra of 3y in  $\text{CDCl}_3$**

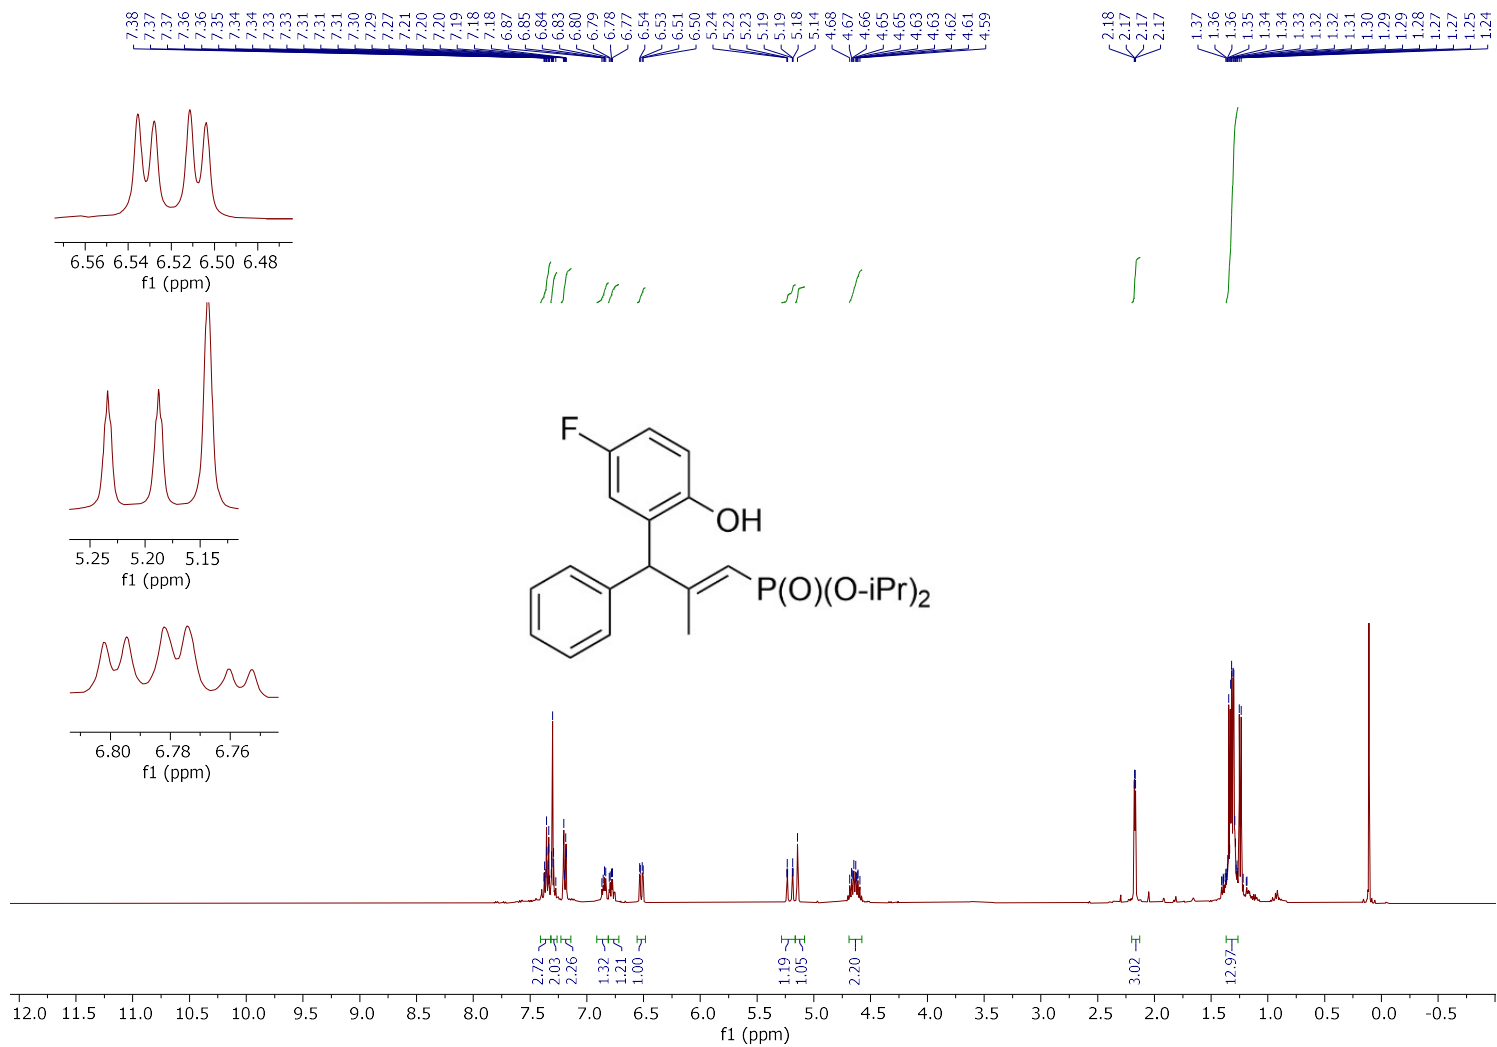

Figure S103:  $^1\text{H}$  NMR Spectra of 3z in  $\text{CDCl}_3$

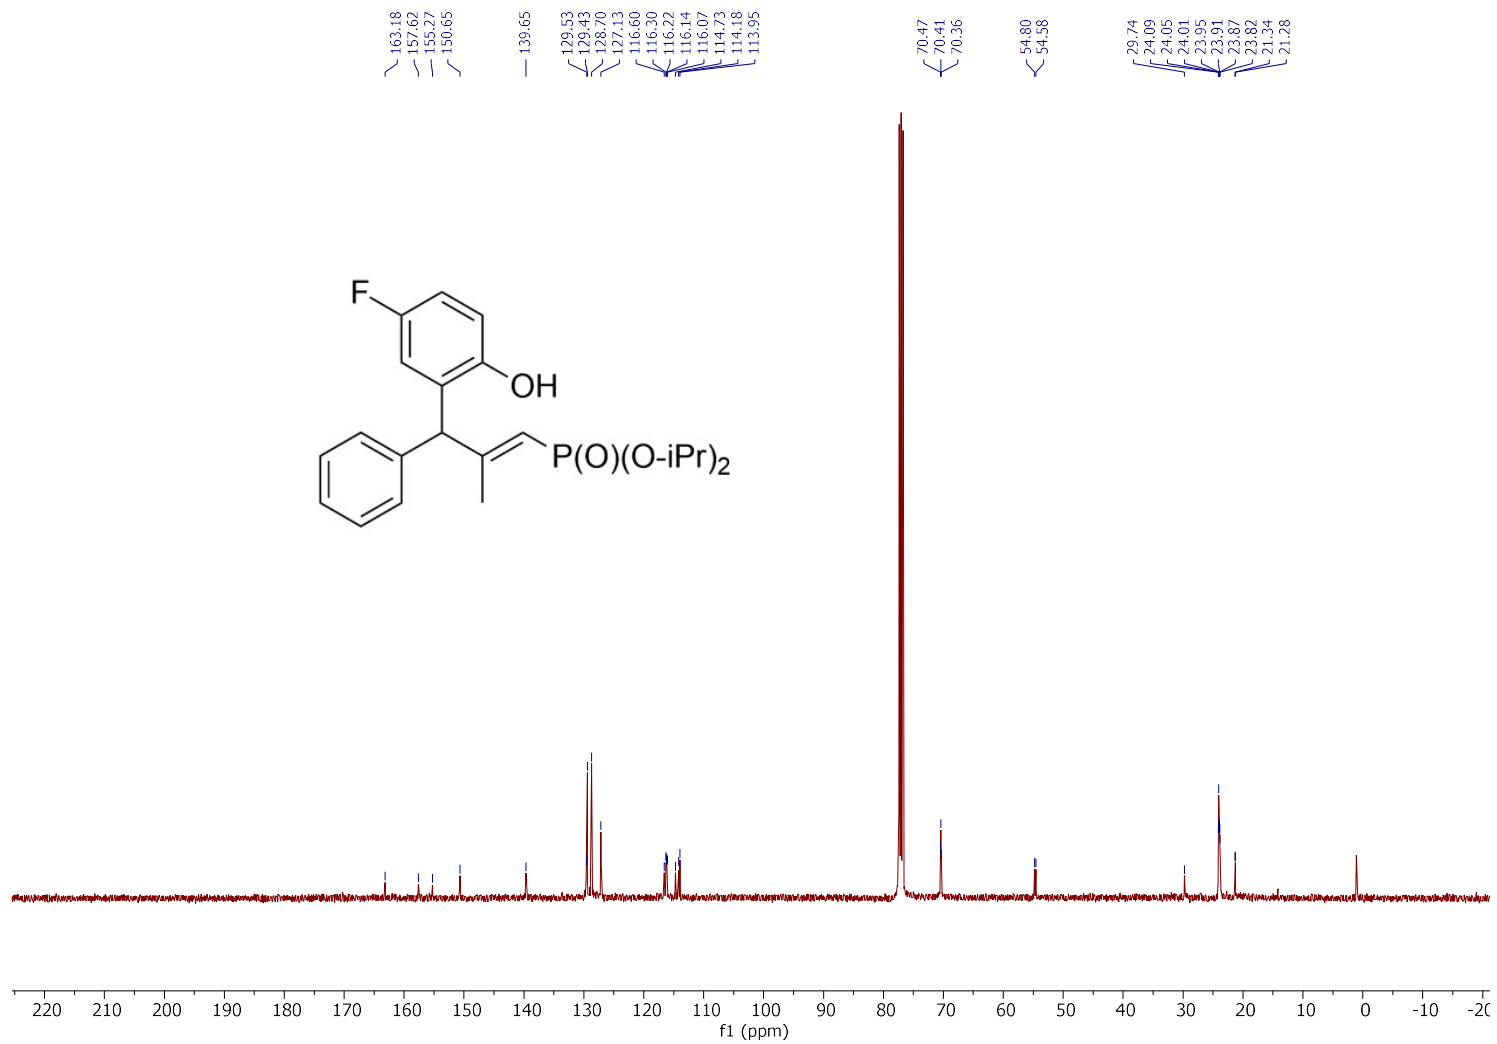

Figure S104:  $^{13}\text{C}$  NMR Spectra of 3z in  $\text{CDCl}_3$

— 17.11

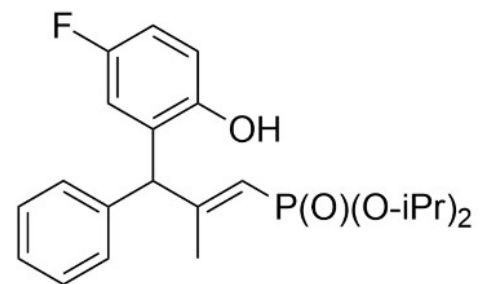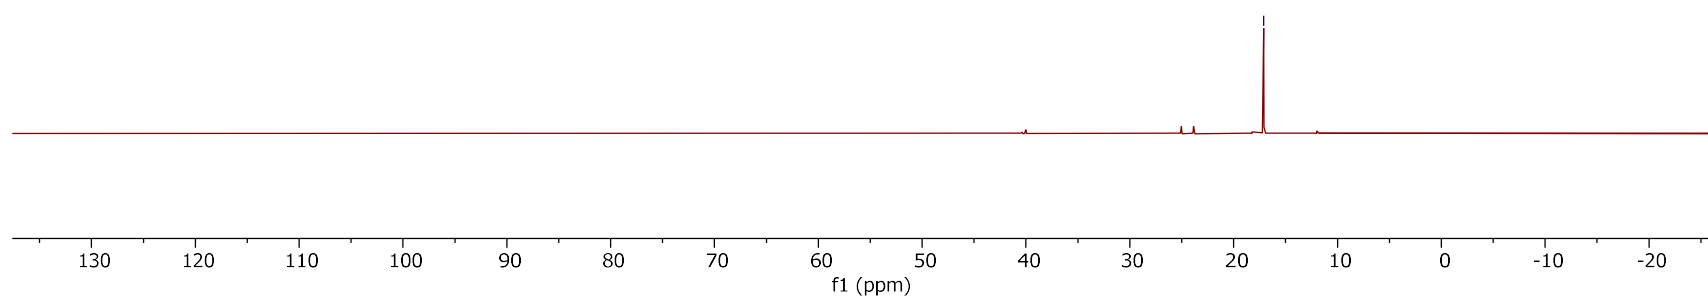

Figure S105:  $^{31}\text{P}$  NMR Spectra of 3z in  $\text{CDCl}_3$

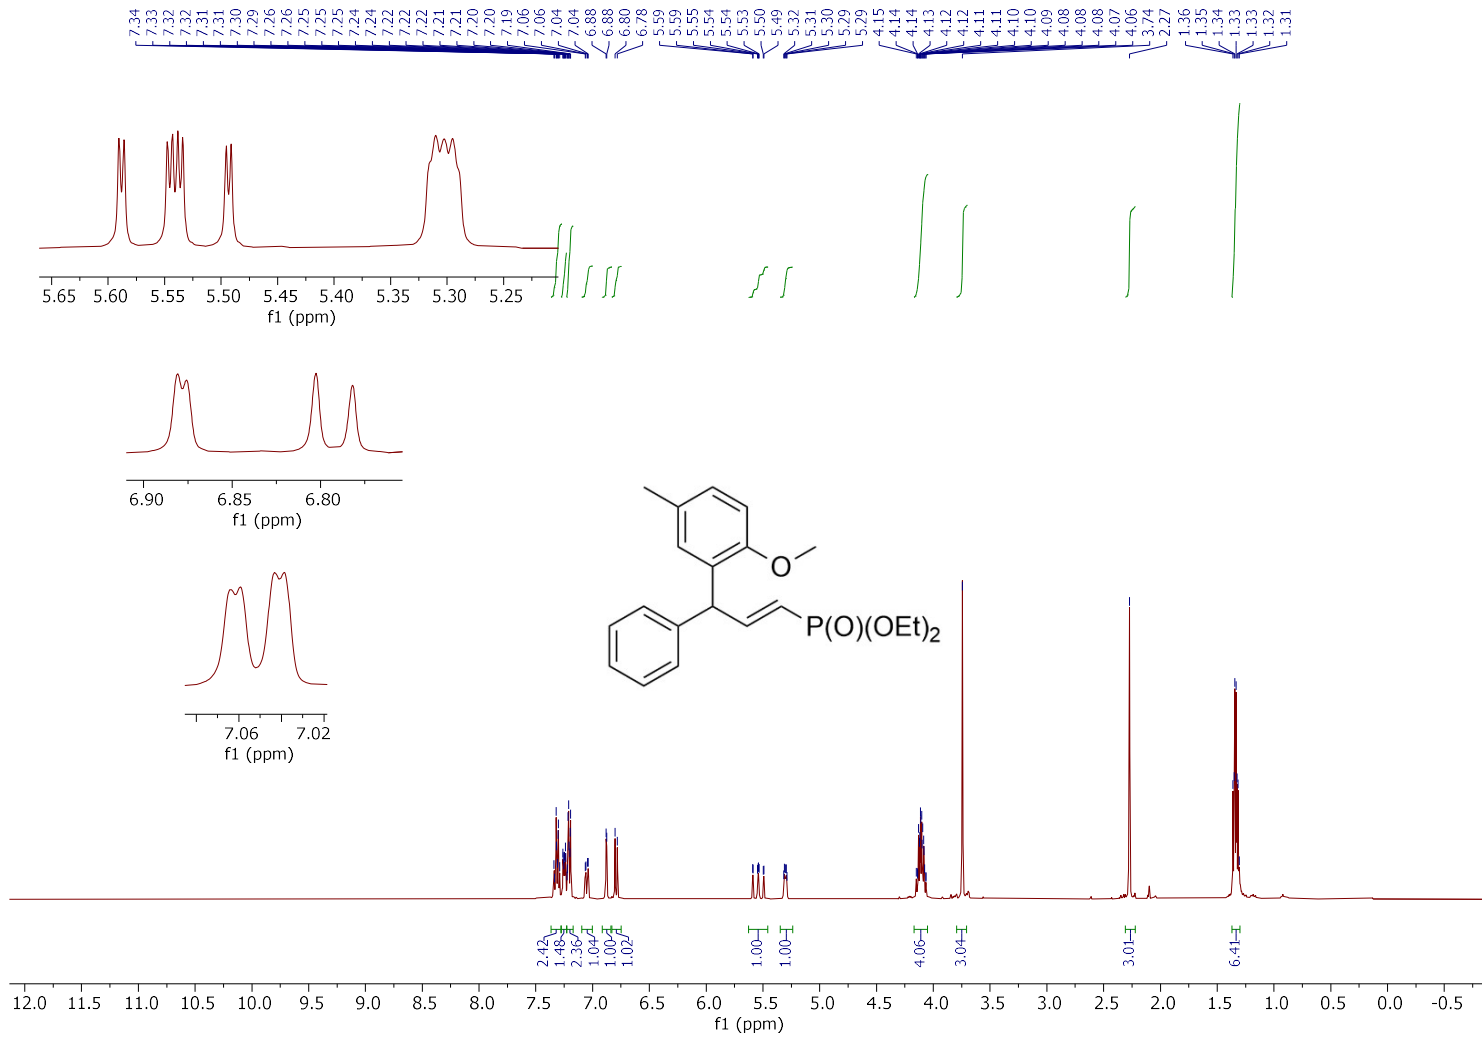

Figure S106:  $^1\text{H}$  NMR Spectra of 5a in  $\text{CDCl}_3$

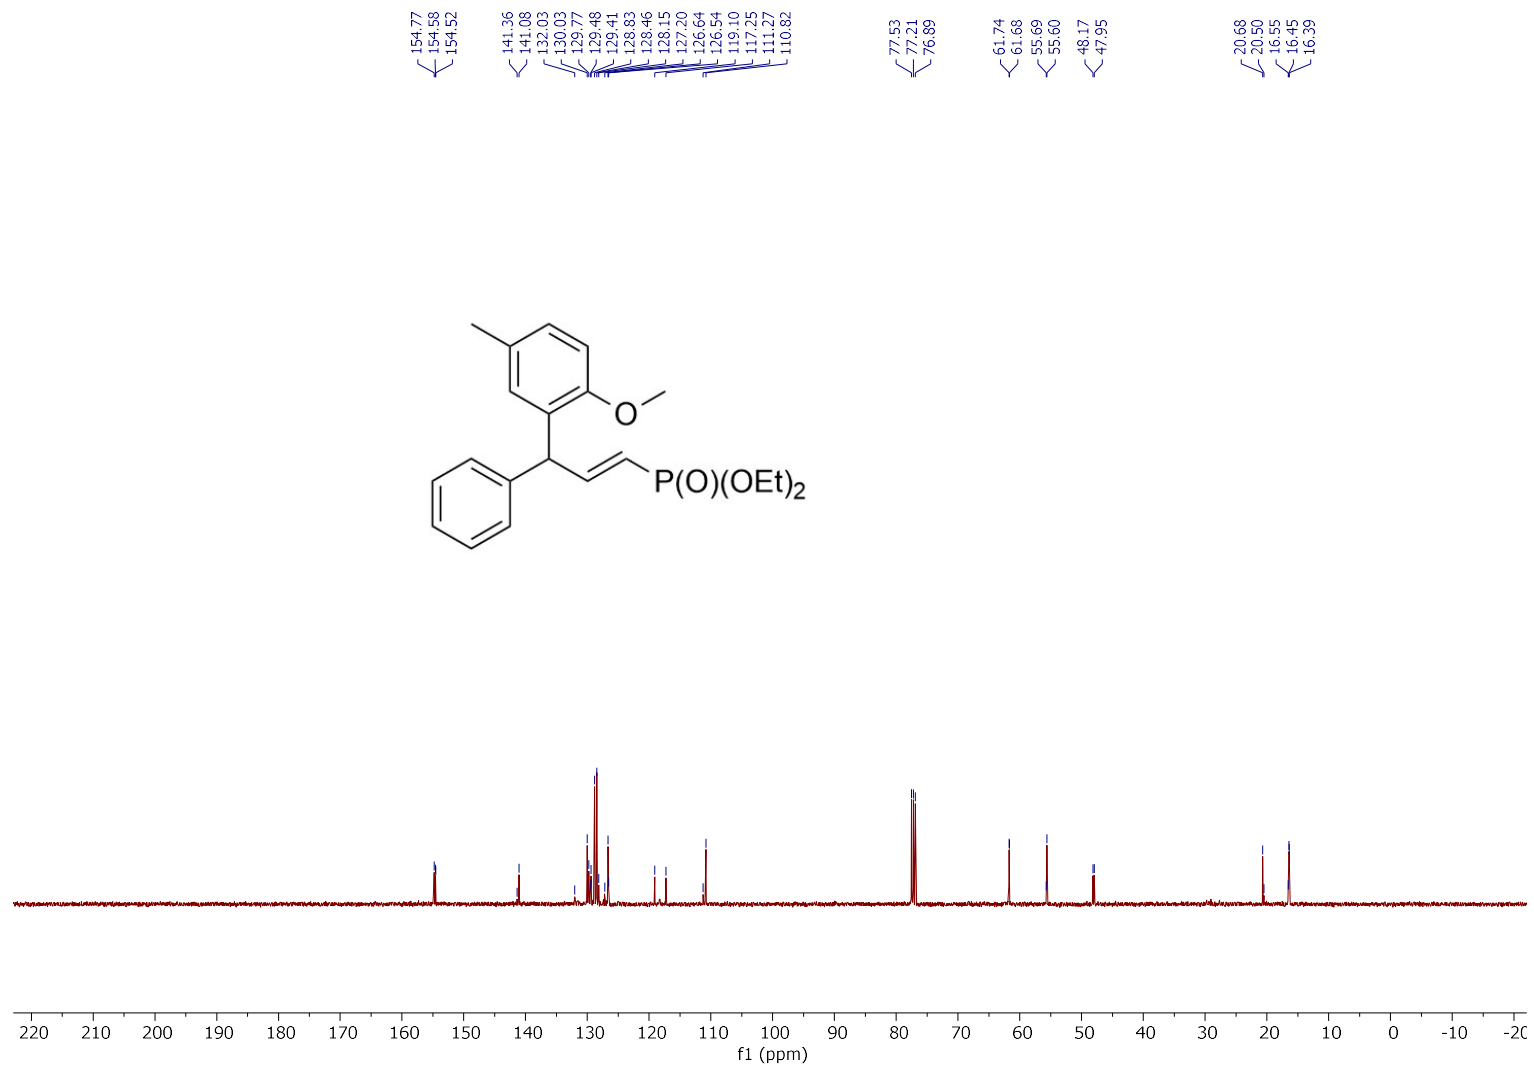

Figure S107:  $^{13}\text{C}\{^1\text{H}\}$  NMR Spectra of 5a in  $\text{CDCl}_3$

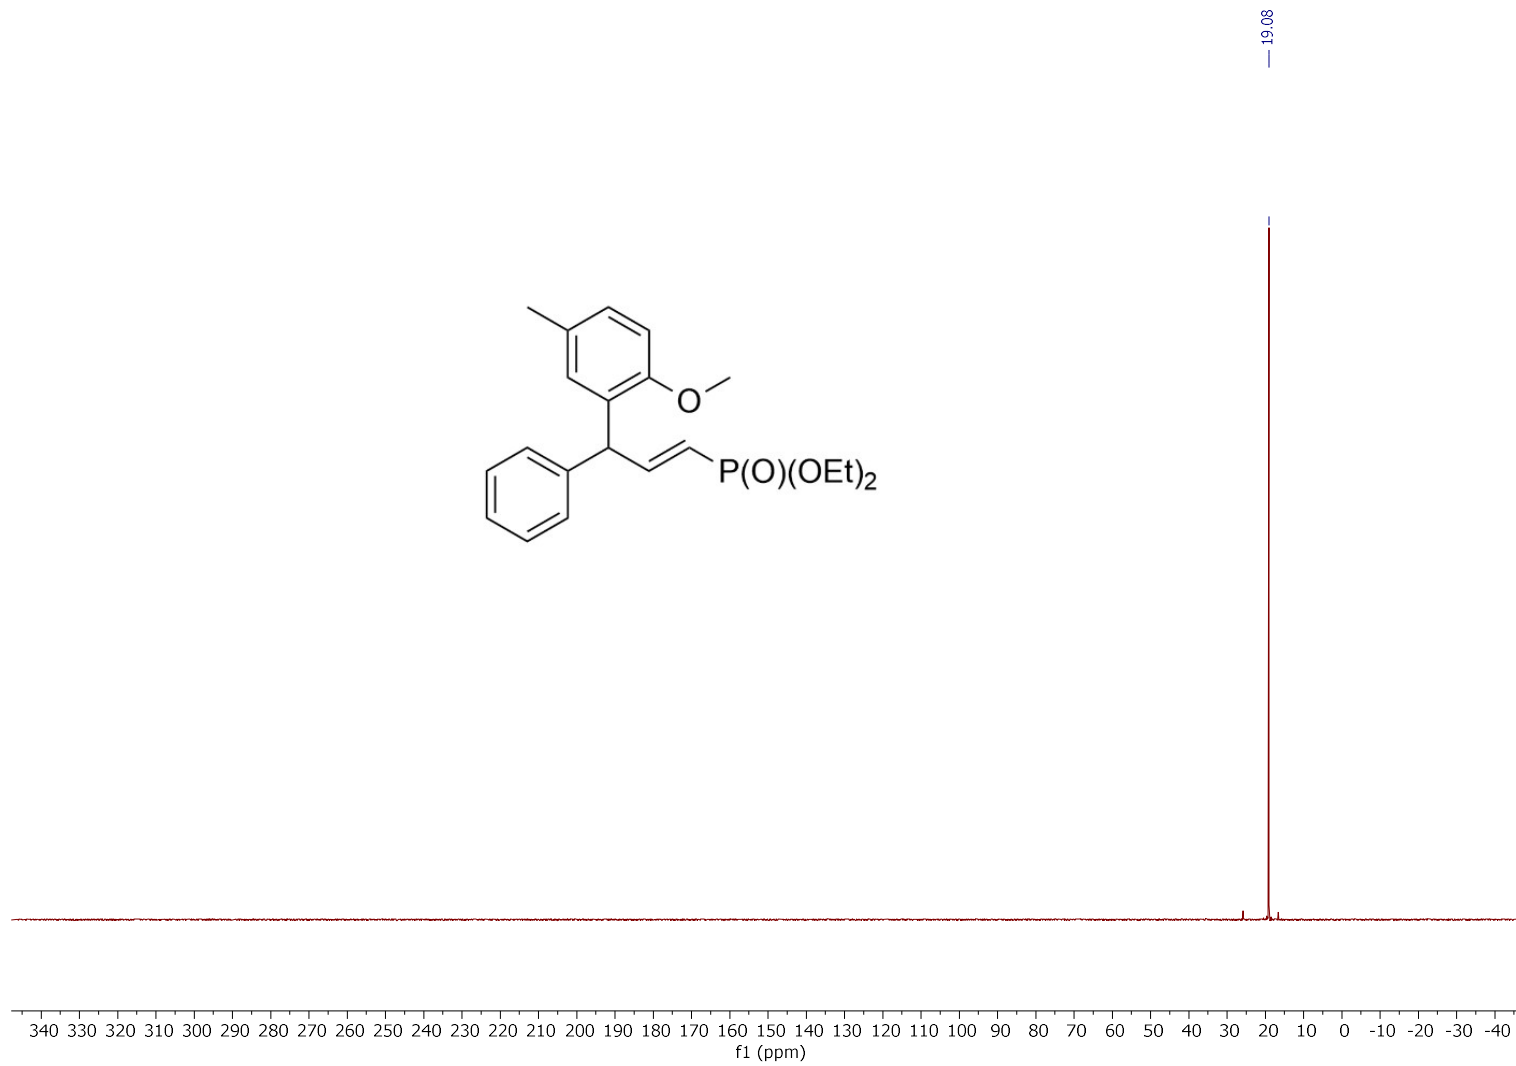

Figure S108:  $^{31}\text{P}\{^1\text{H}\}$  NMR Spectra of 5a in  $\text{CDCl}_3$

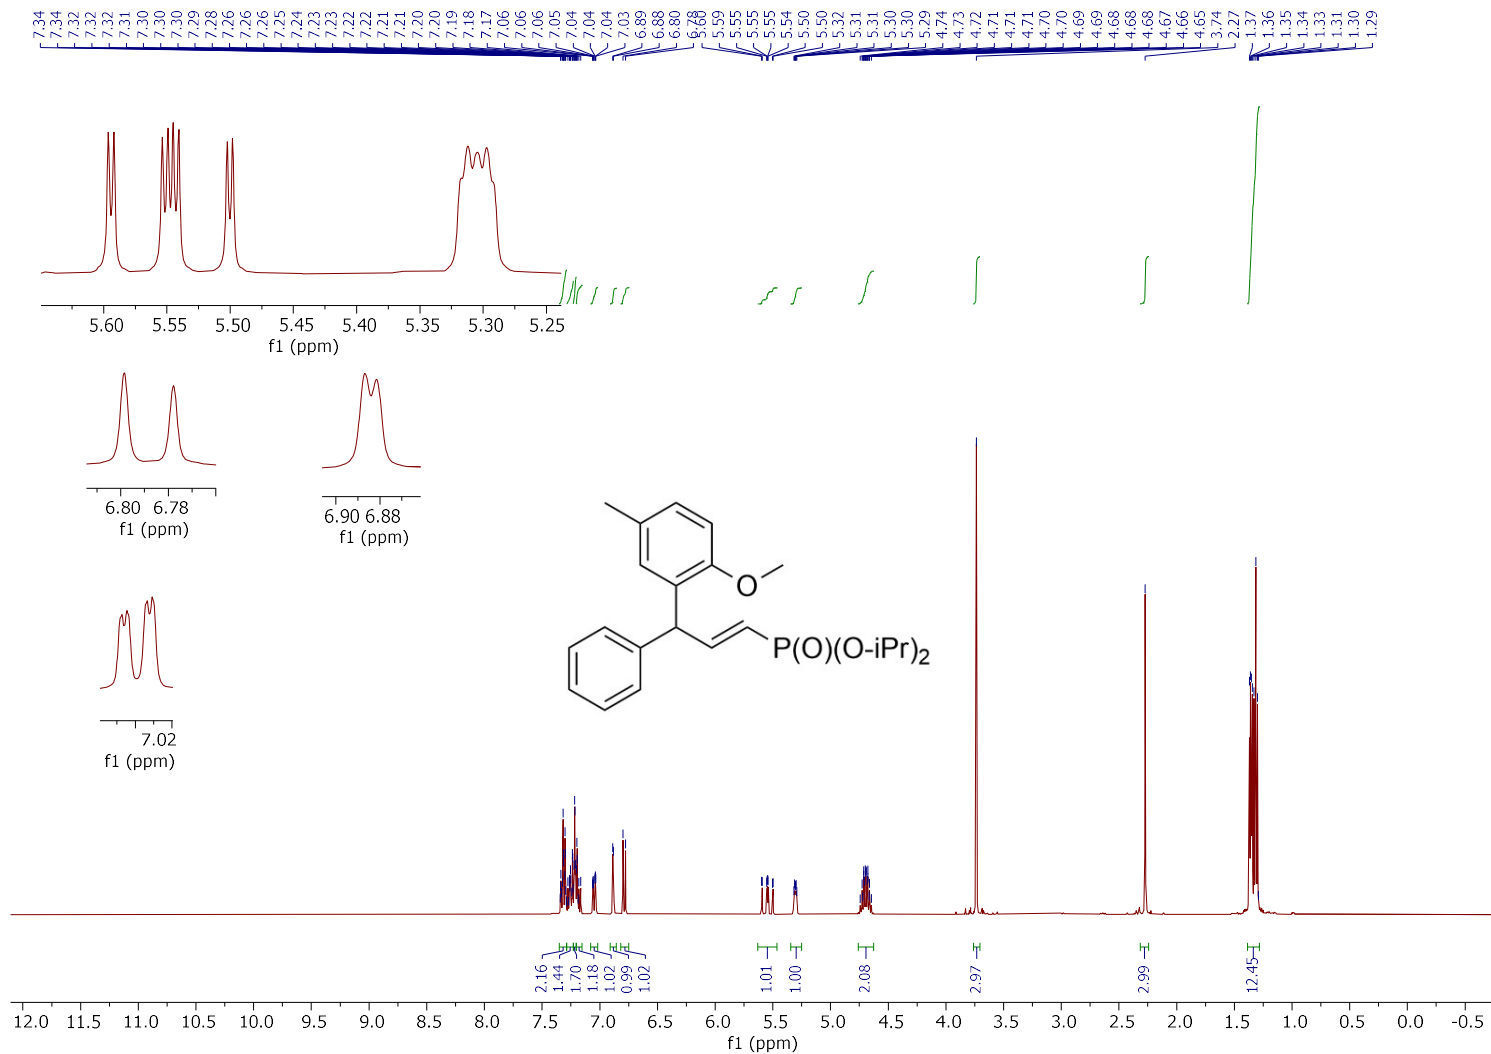

Figure S109:  $^1\text{H}$  NMR Spectra of 5b in  $\text{CDCl}_3$

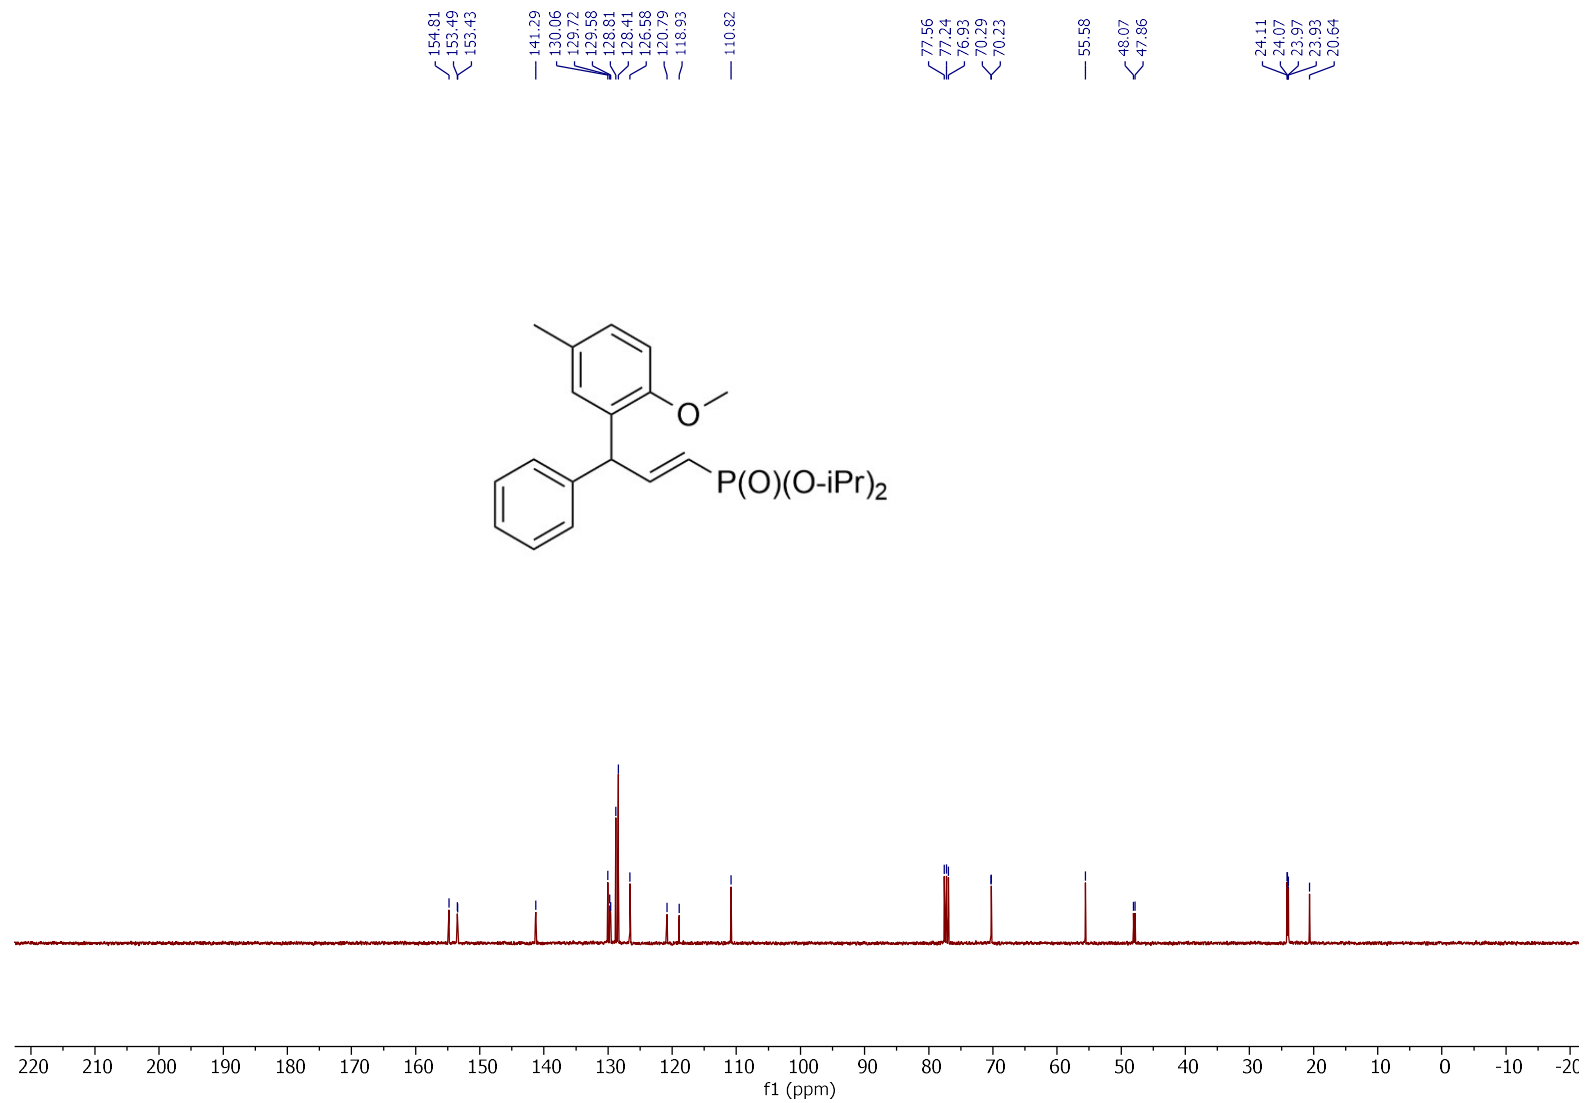

Figure S110:  $^{13}\text{C}\{^1\text{H}\}$  NMR Spectra of 5b in  $\text{CDCl}_3$

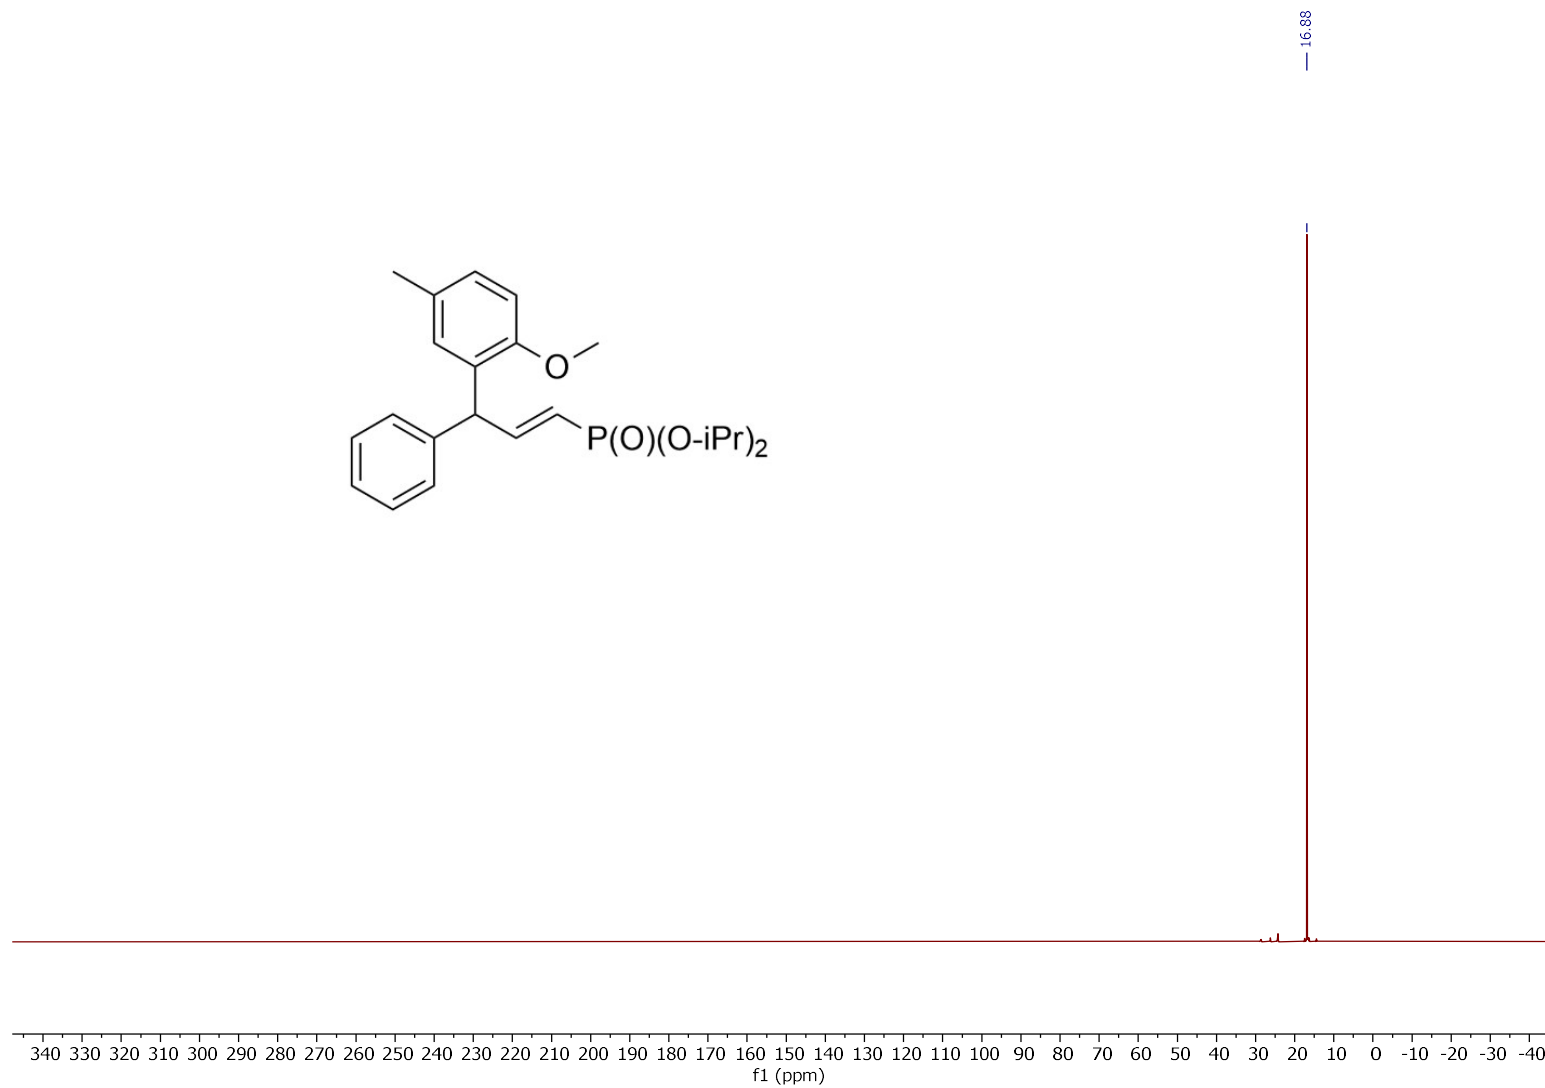

Figure S111:  $^{31}\text{P}\{^1\text{H}\}$  NMR Spectra of 5b in  $\text{CDCl}_3$

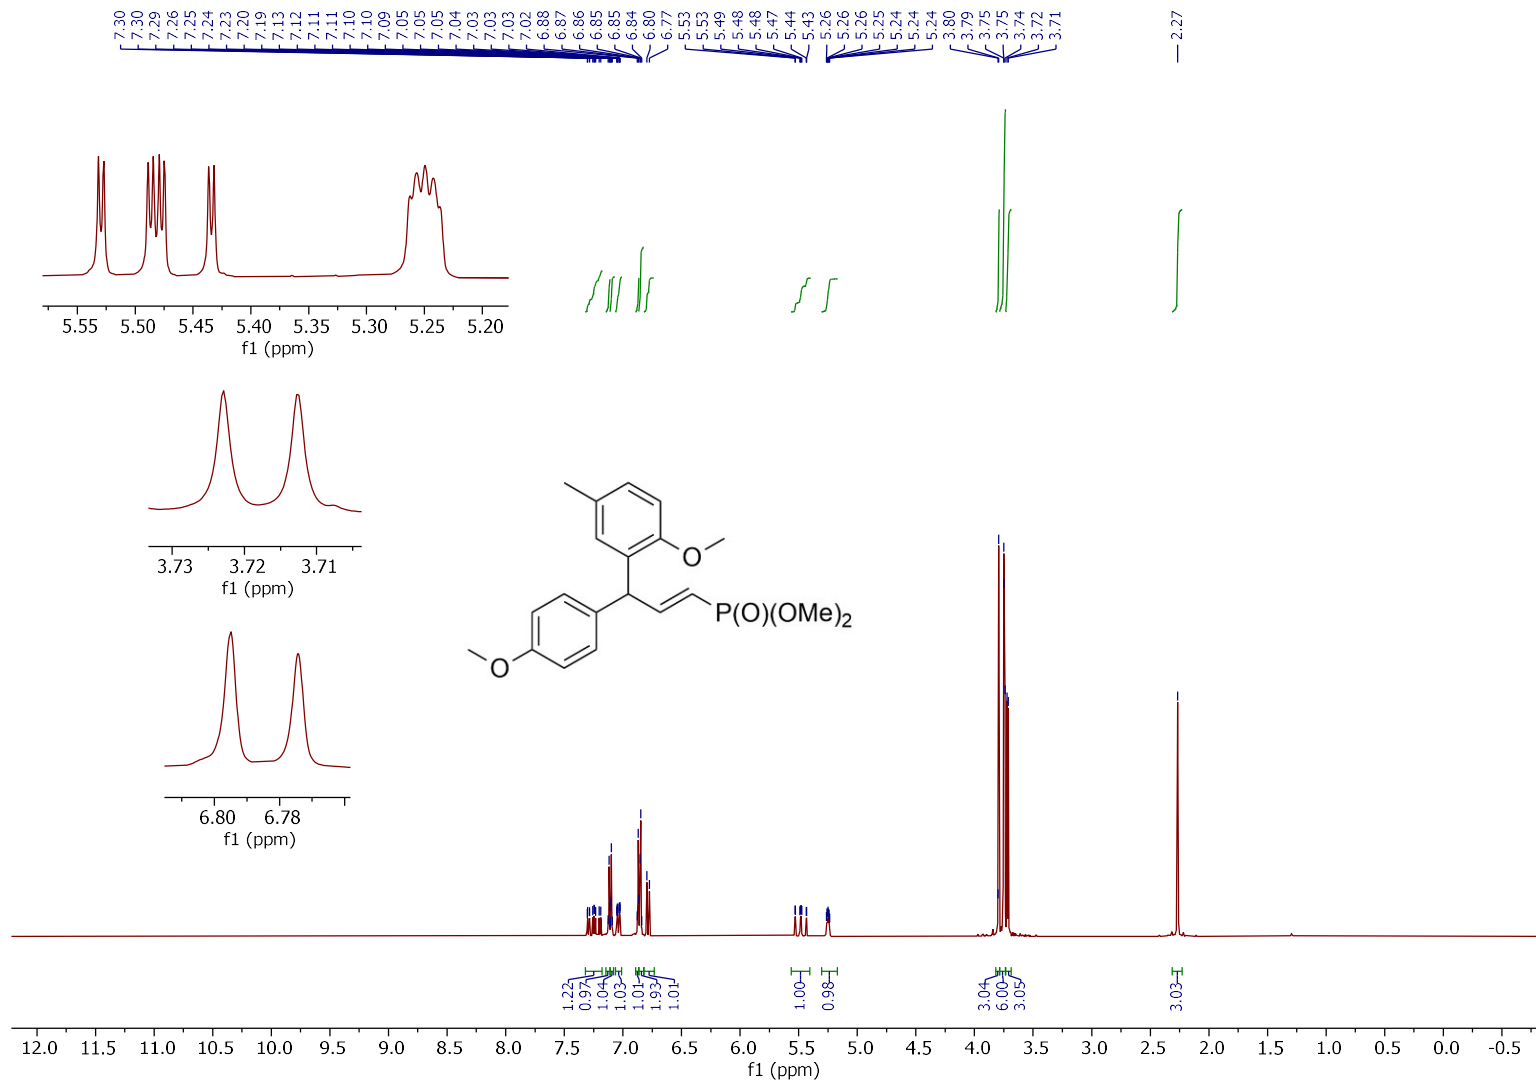

Figure S112:  $^1\text{H}$  NMR Spectra of 5c in  $\text{CDCl}_3$

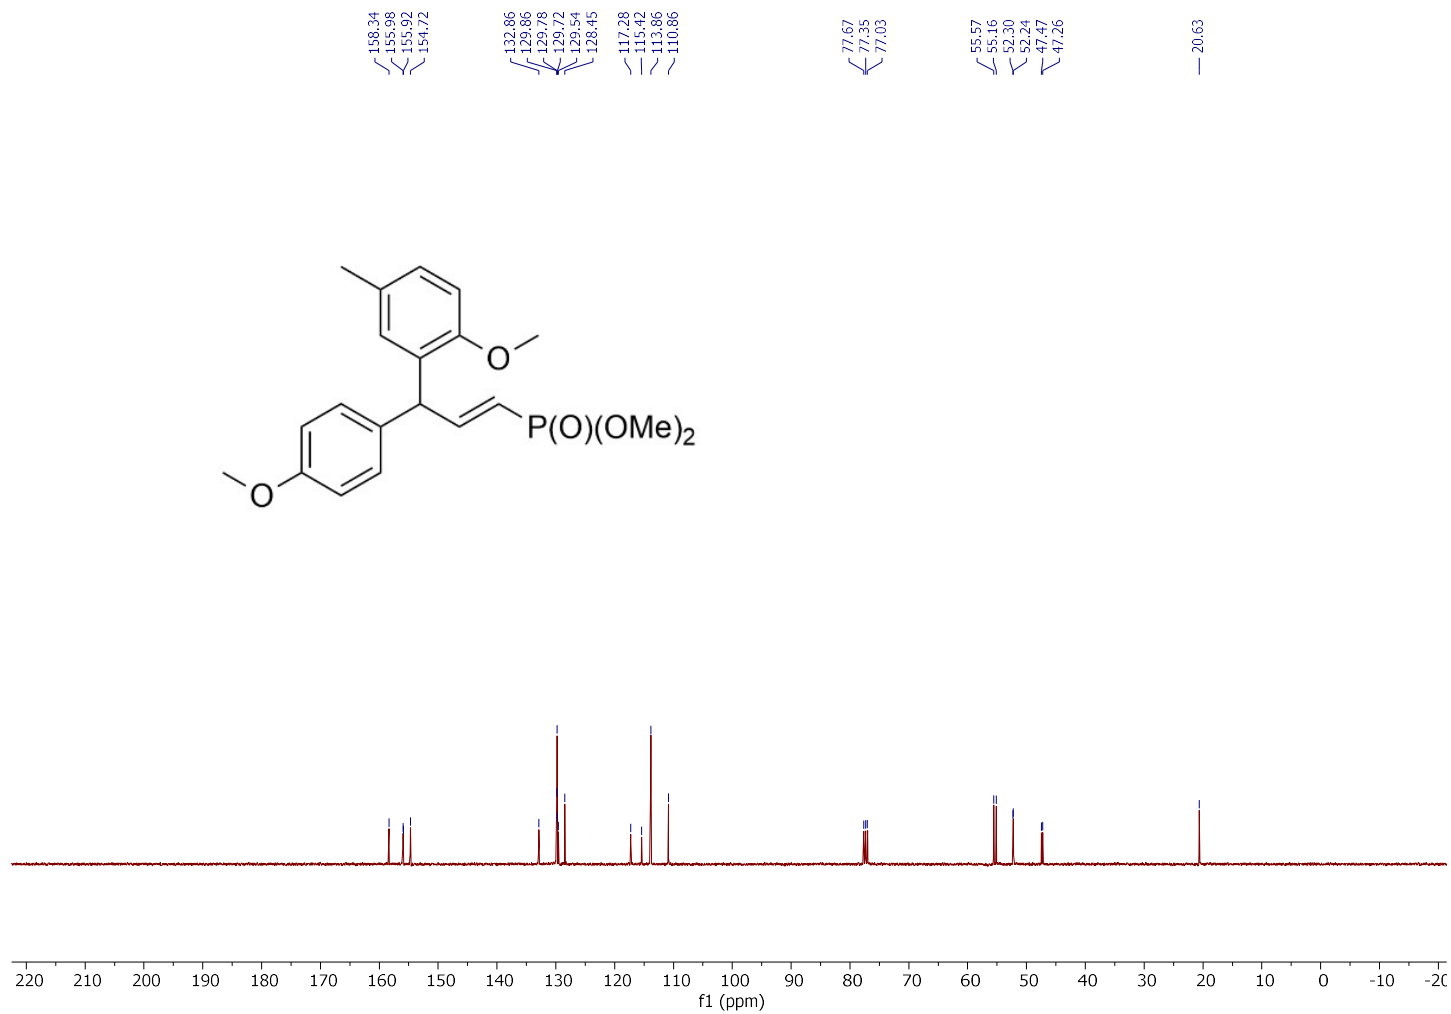

Figure S113:  $^{13}\text{C}\{^1\text{H}\}$  NMR Spectra of 5c in  $\text{CDCl}_3$

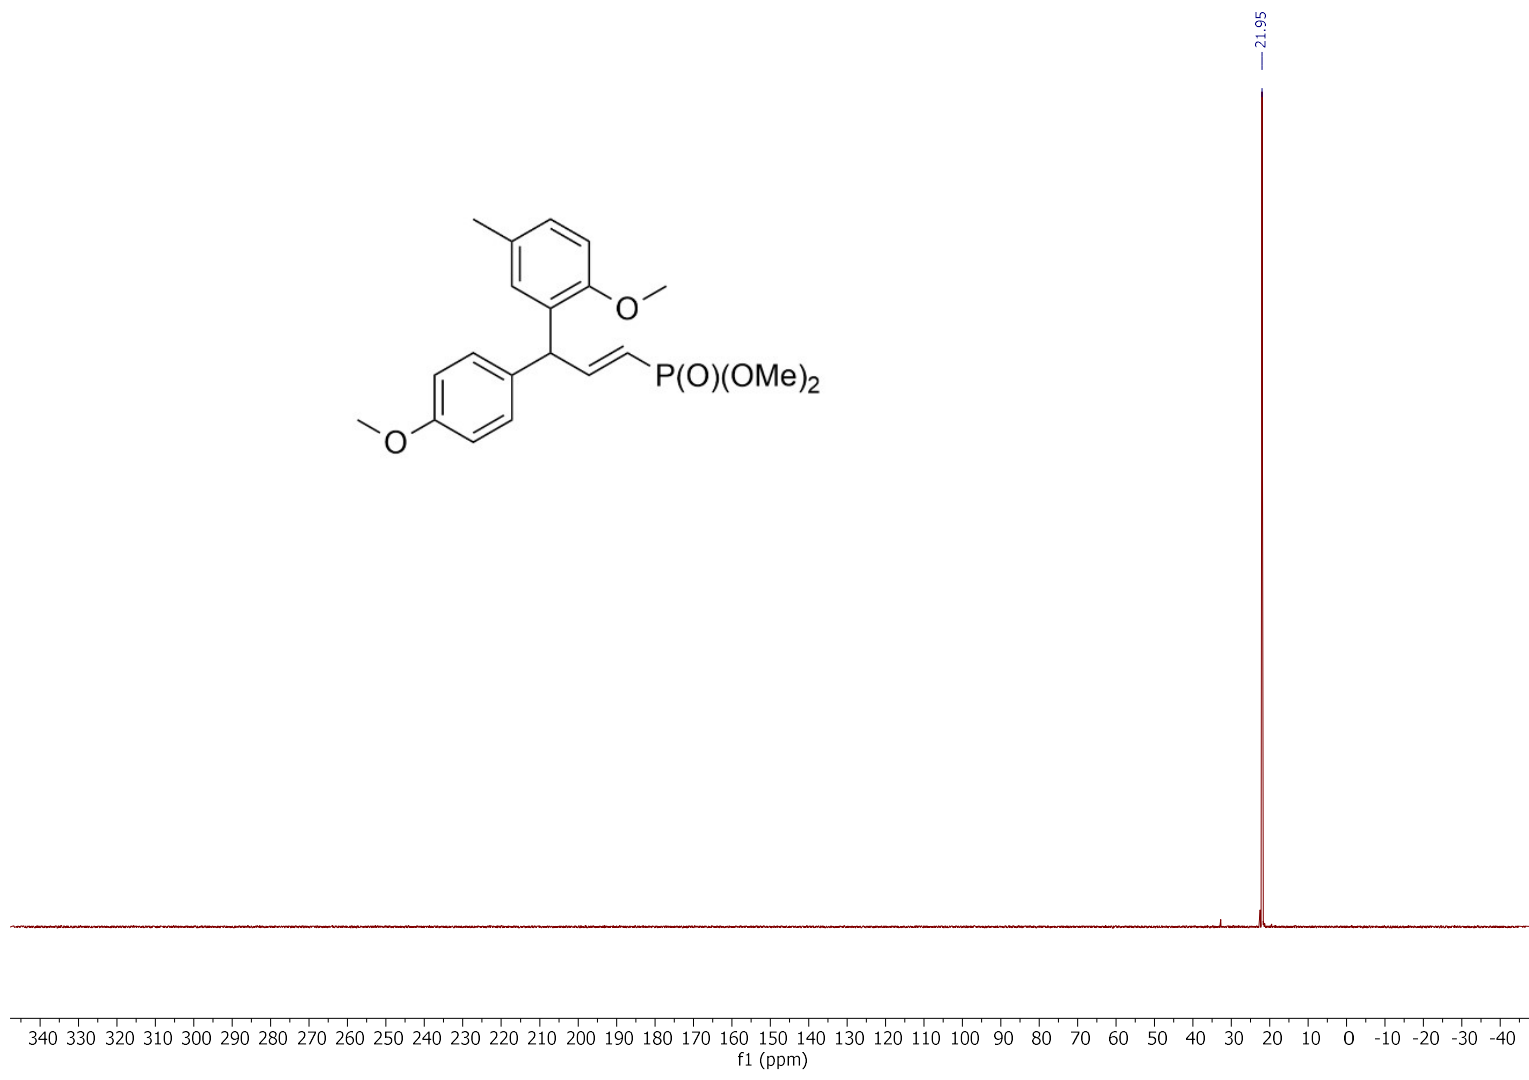

Figure S114:  $^{31}\text{P}\{^1\text{H}\}$  NMR Spectra of 5c in  $\text{CDCl}_3$

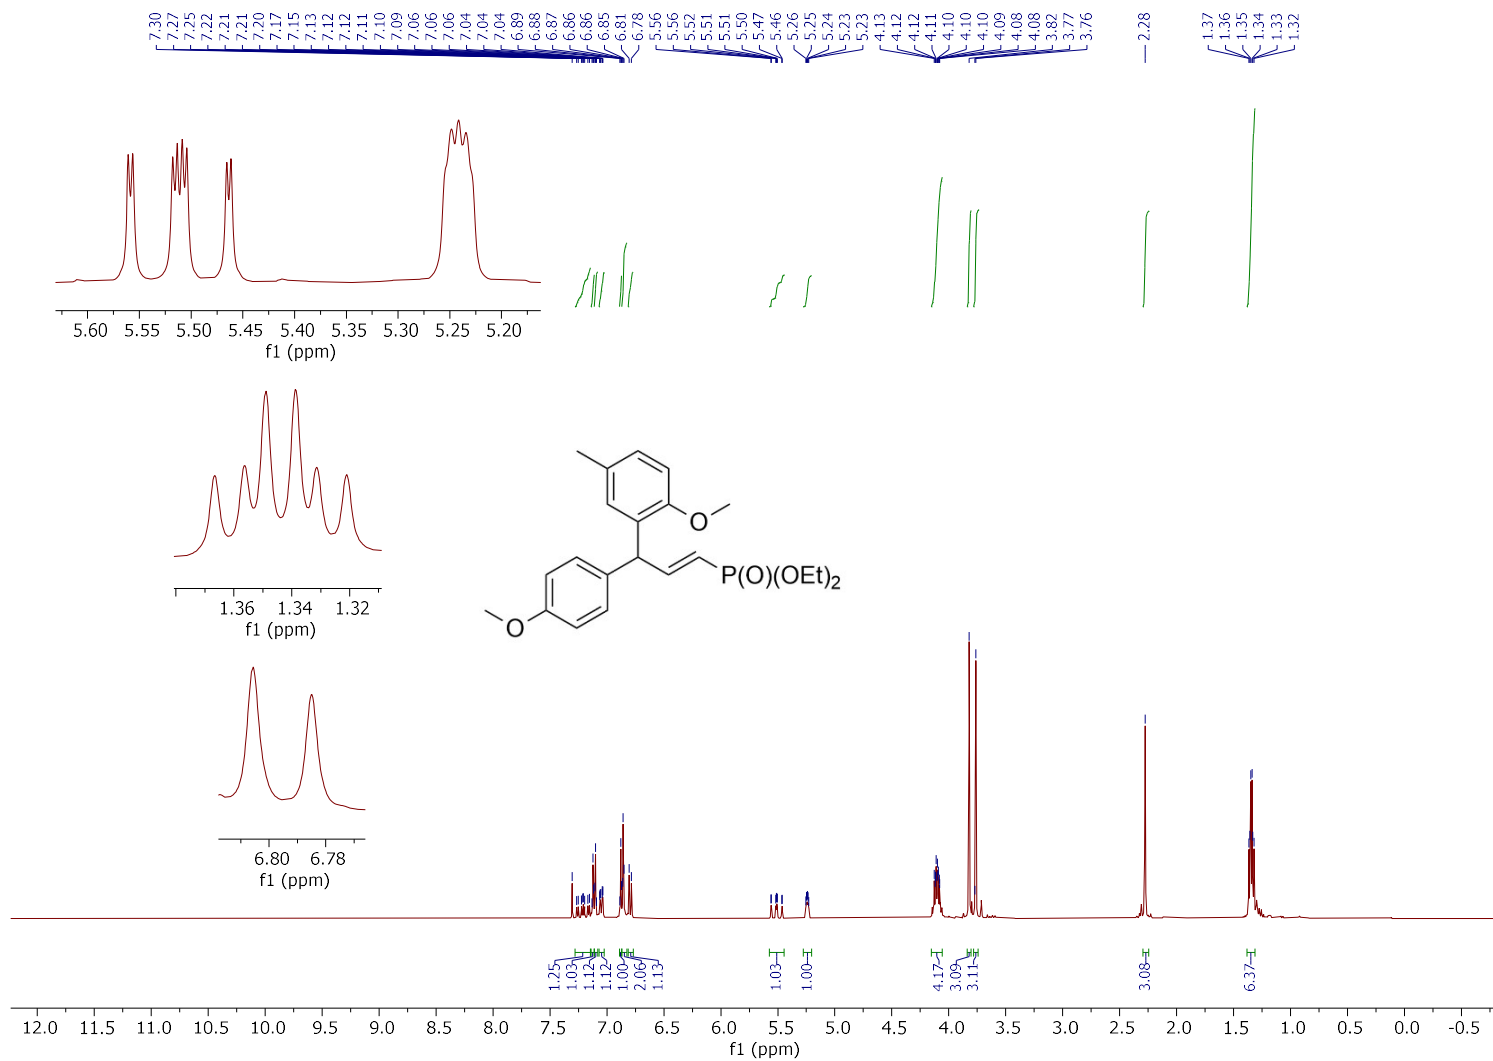

**Figure S115:  $^1\text{H}$  NMR Spectra of 5d in  $\text{CDCl}_3$**

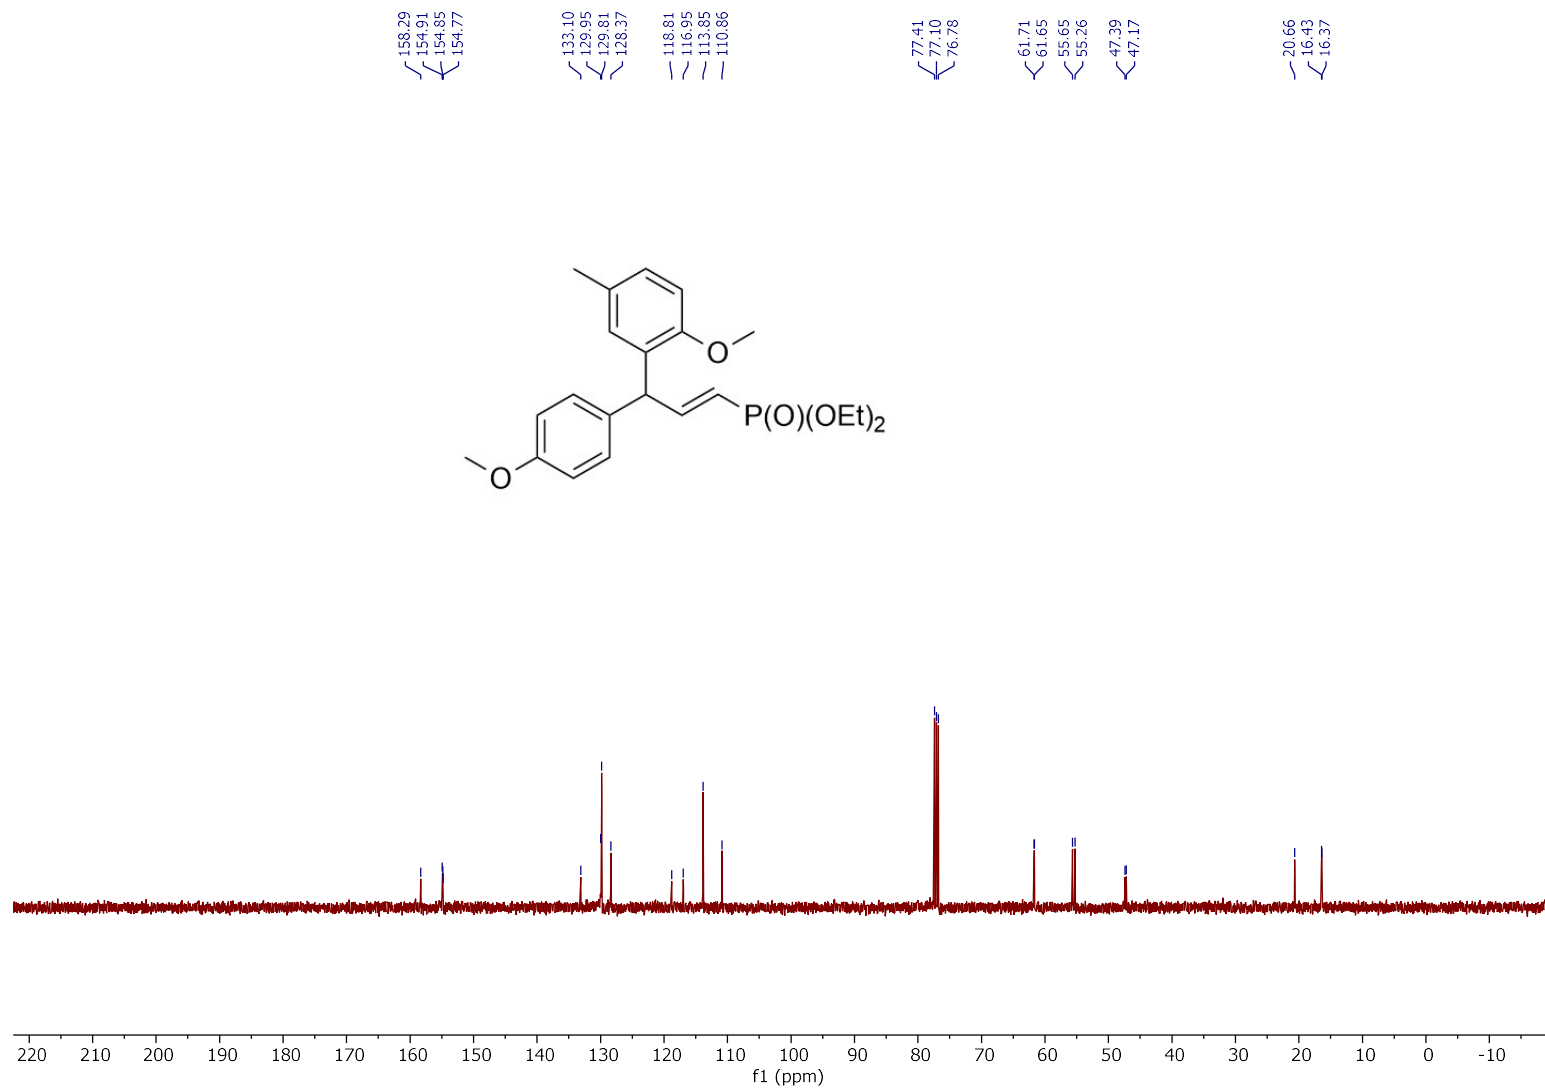

Figure S116:  $^{13}\text{C}\{^1\text{H}\}$  NMR Spectra of 5d in  $\text{CDCl}_3$

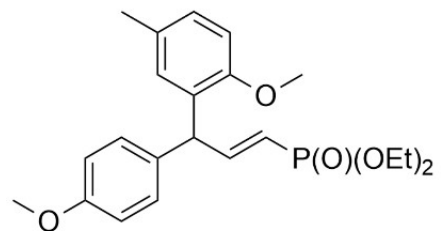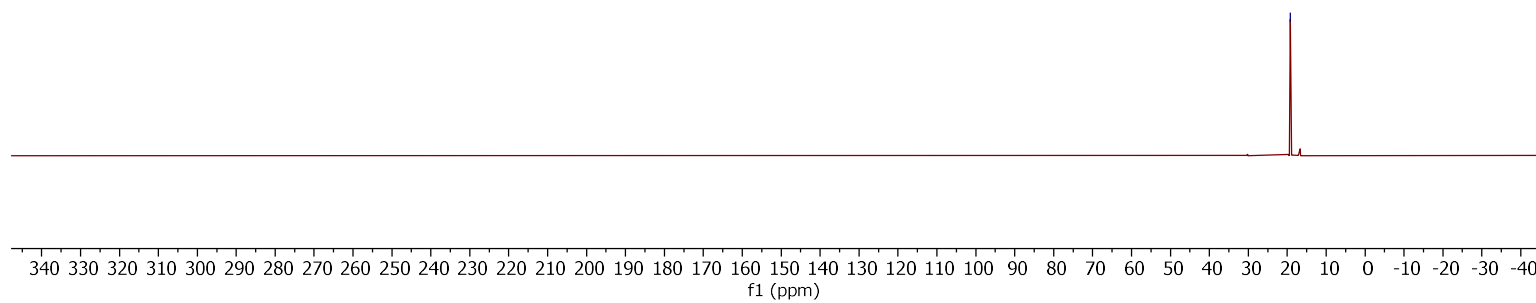

Figure S117: <sup>31</sup>P{<sup>1</sup>H} NMR Spectra of 5d in CDCl<sub>3</sub>

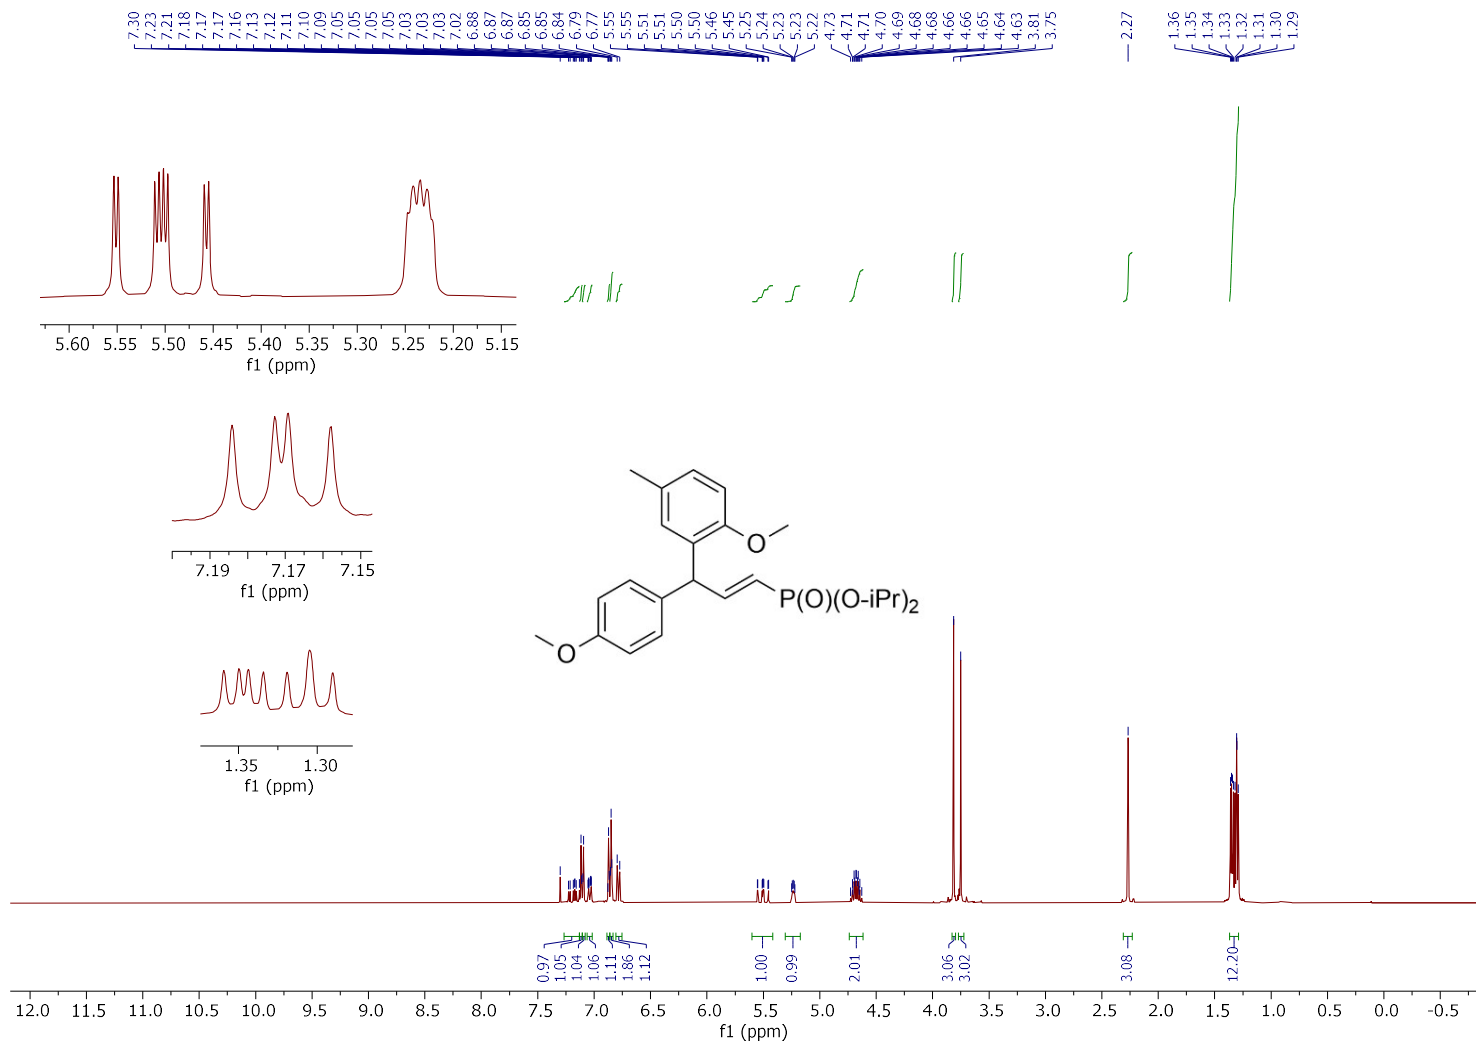

Figure S118:  $^1\text{H}$  NMR Spectra of 5e in  $\text{CDCl}_3$

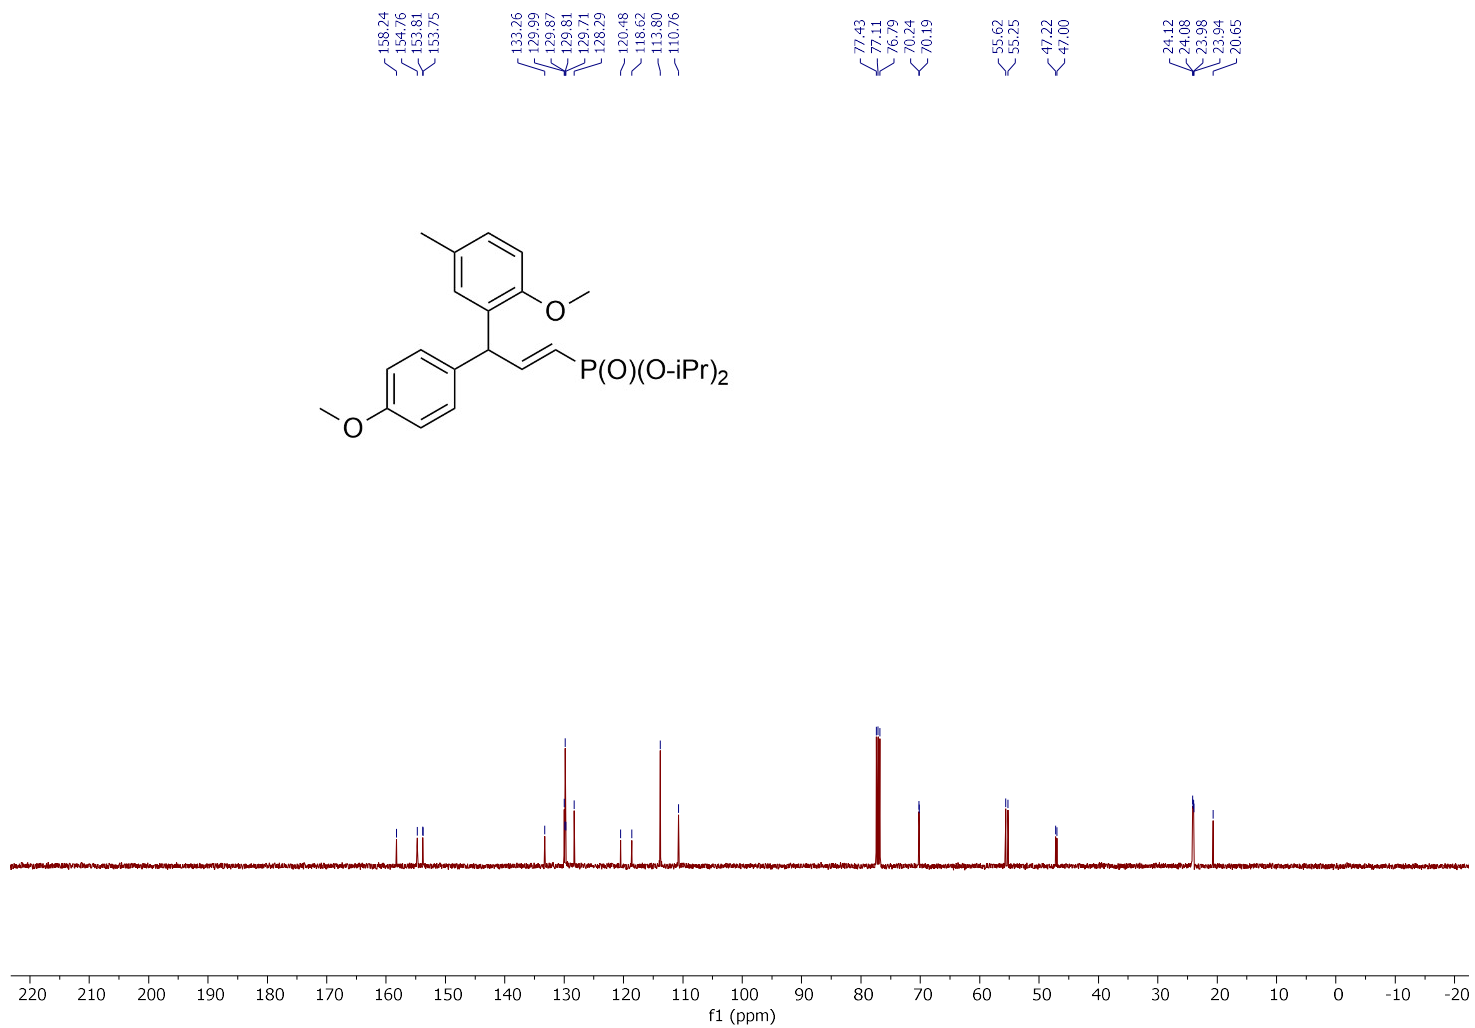

Figure S119:  $^{13}\text{C}\{^1\text{H}\}$  NMR Spectra of 5e in  $\text{CDCl}_3$

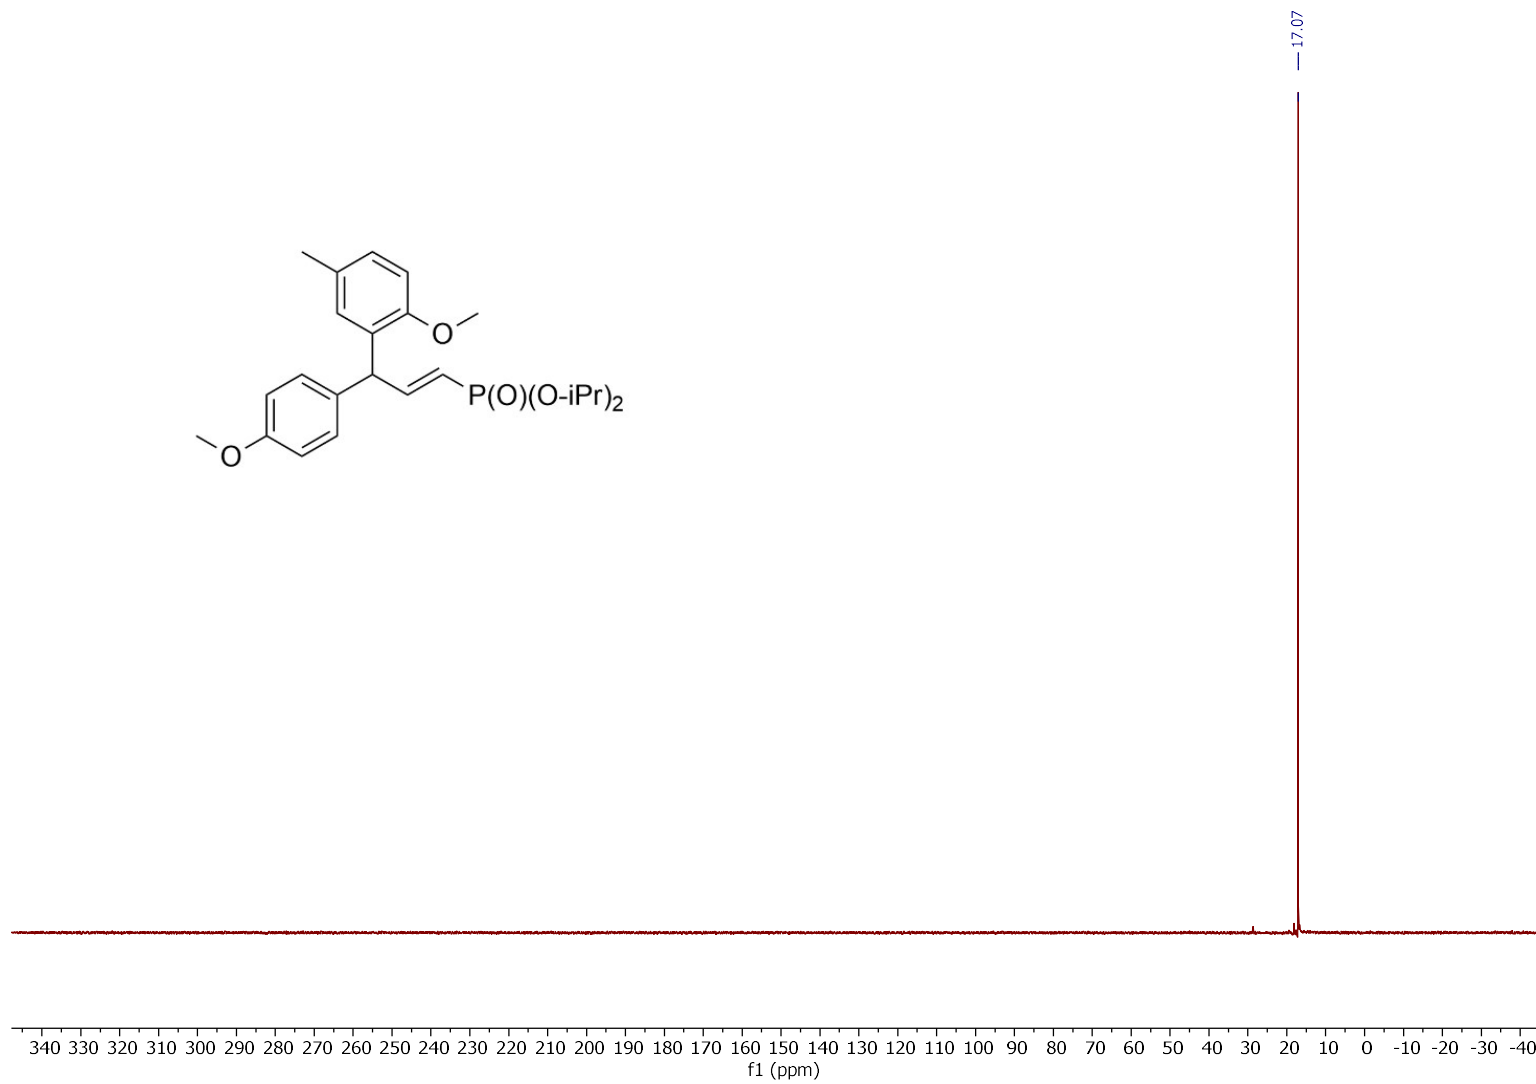

Figure S120:  $^{31}\text{P}\{^1\text{H}\}$  NMR Spectra of 5e in  $\text{CDCl}_3$

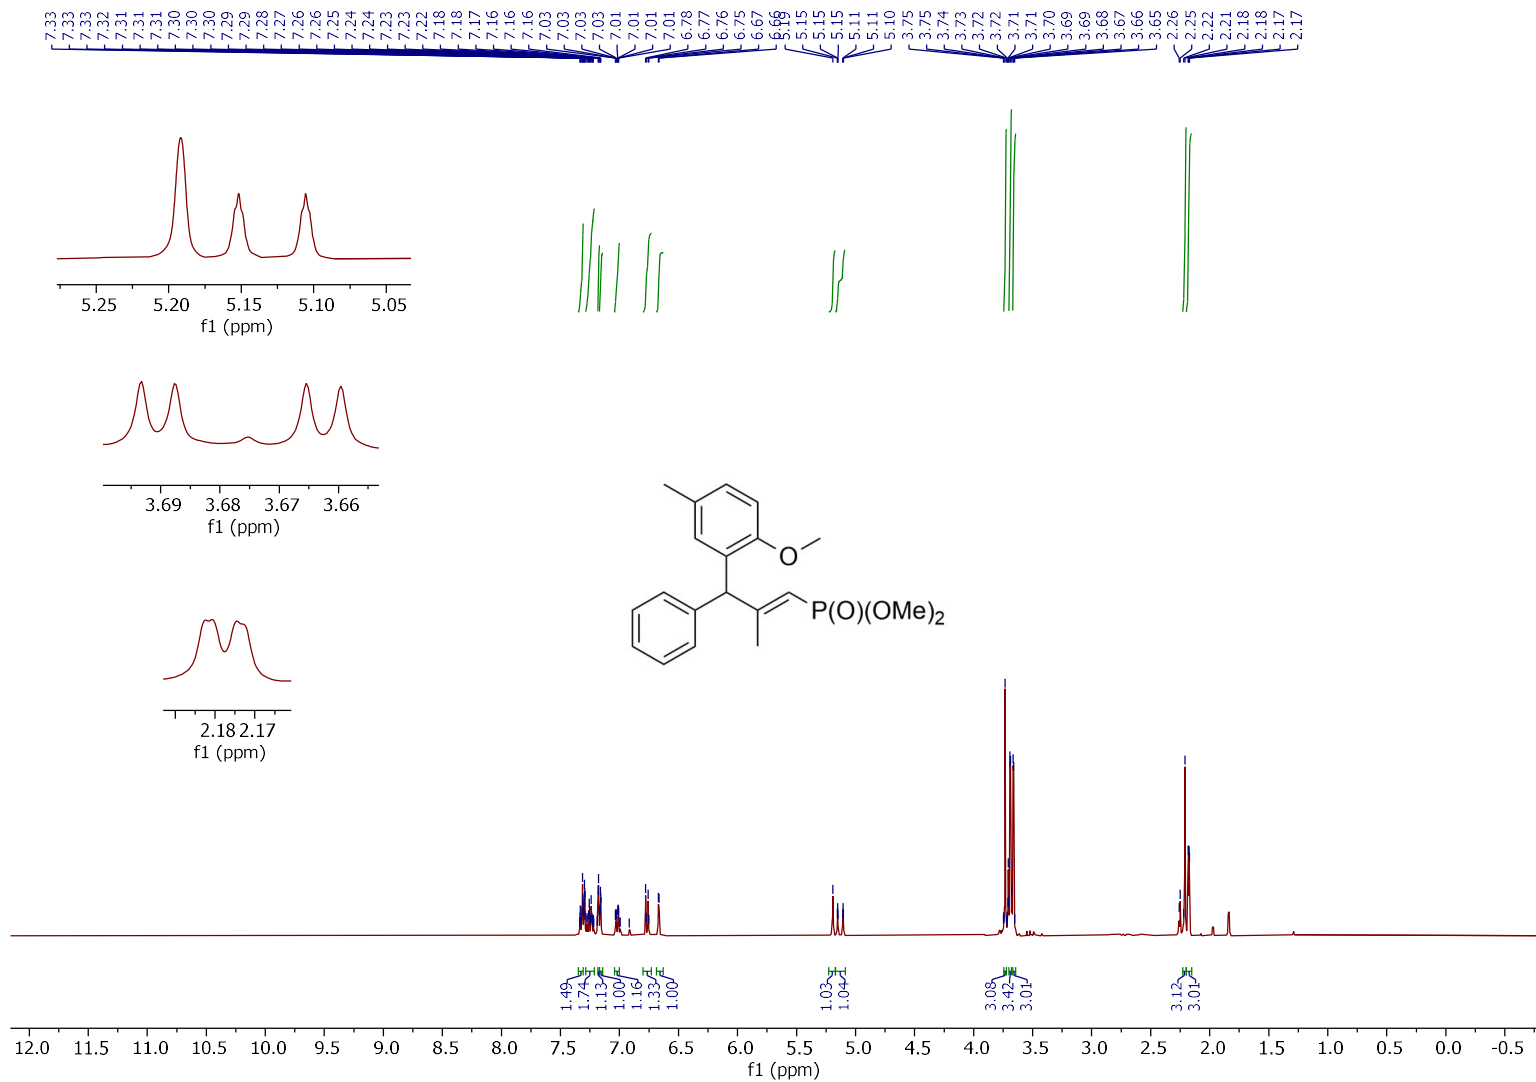

Figure S121:  $^1\text{H}$  NMR Spectra of 5f in  $\text{CDCl}_3$

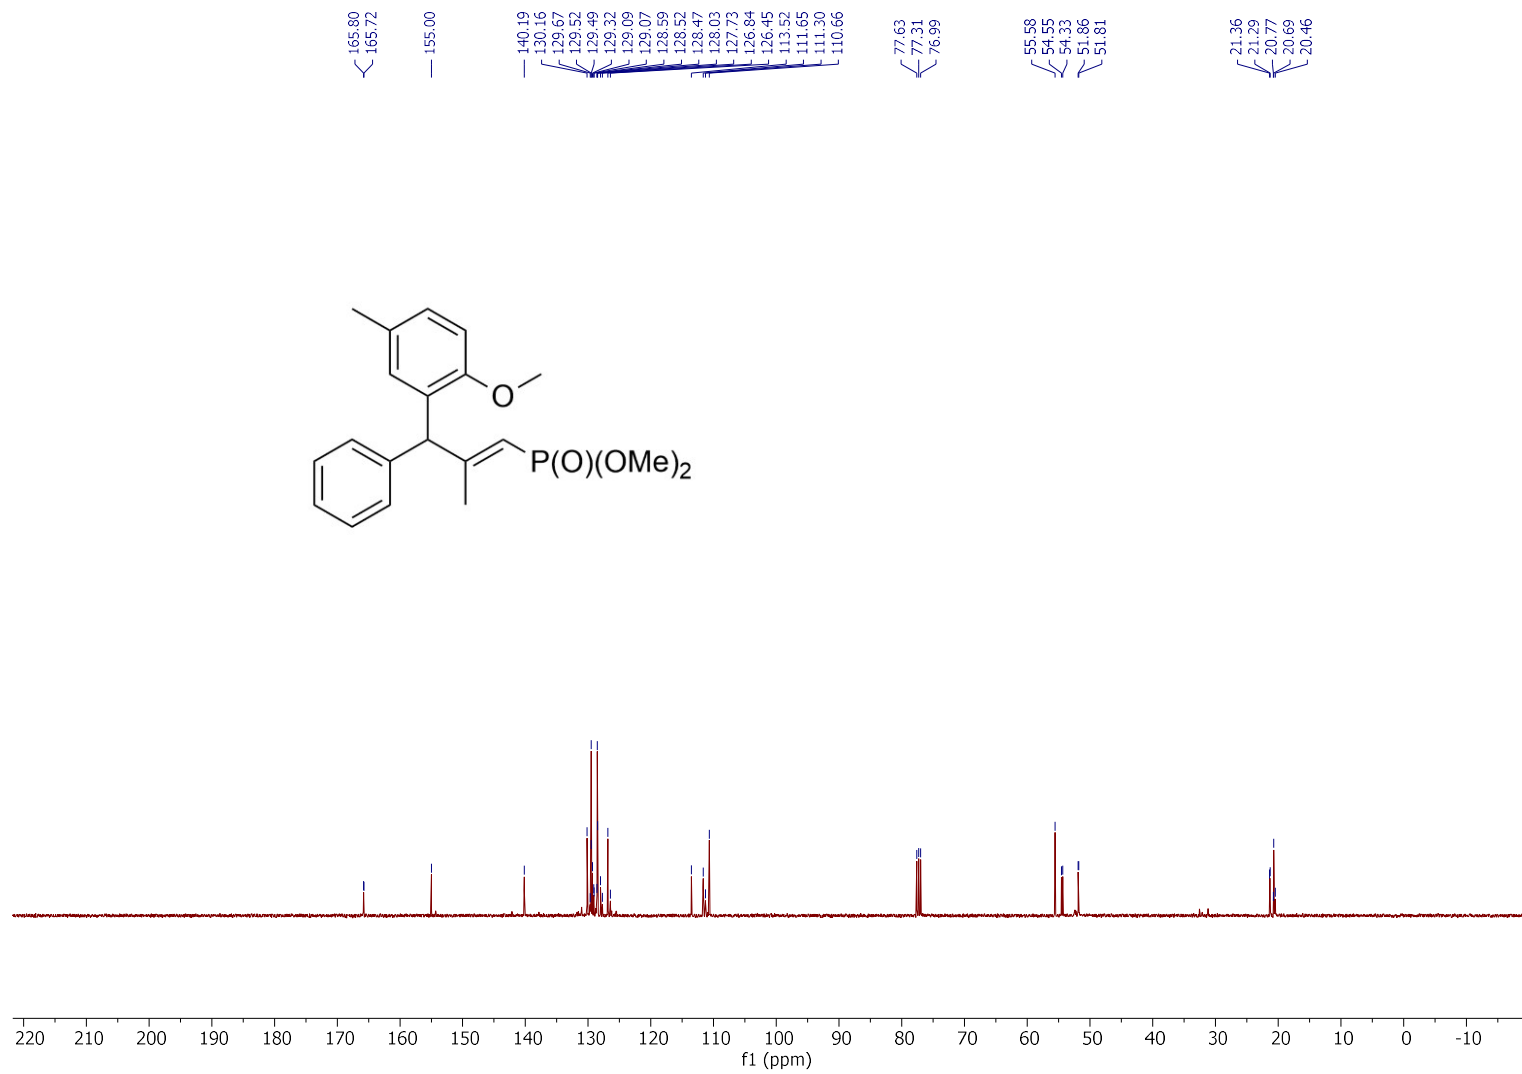

Figure S122:  $^{13}\text{C}\{^1\text{H}\}$  NMR Spectra of 5f in  $\text{CDCl}_3$

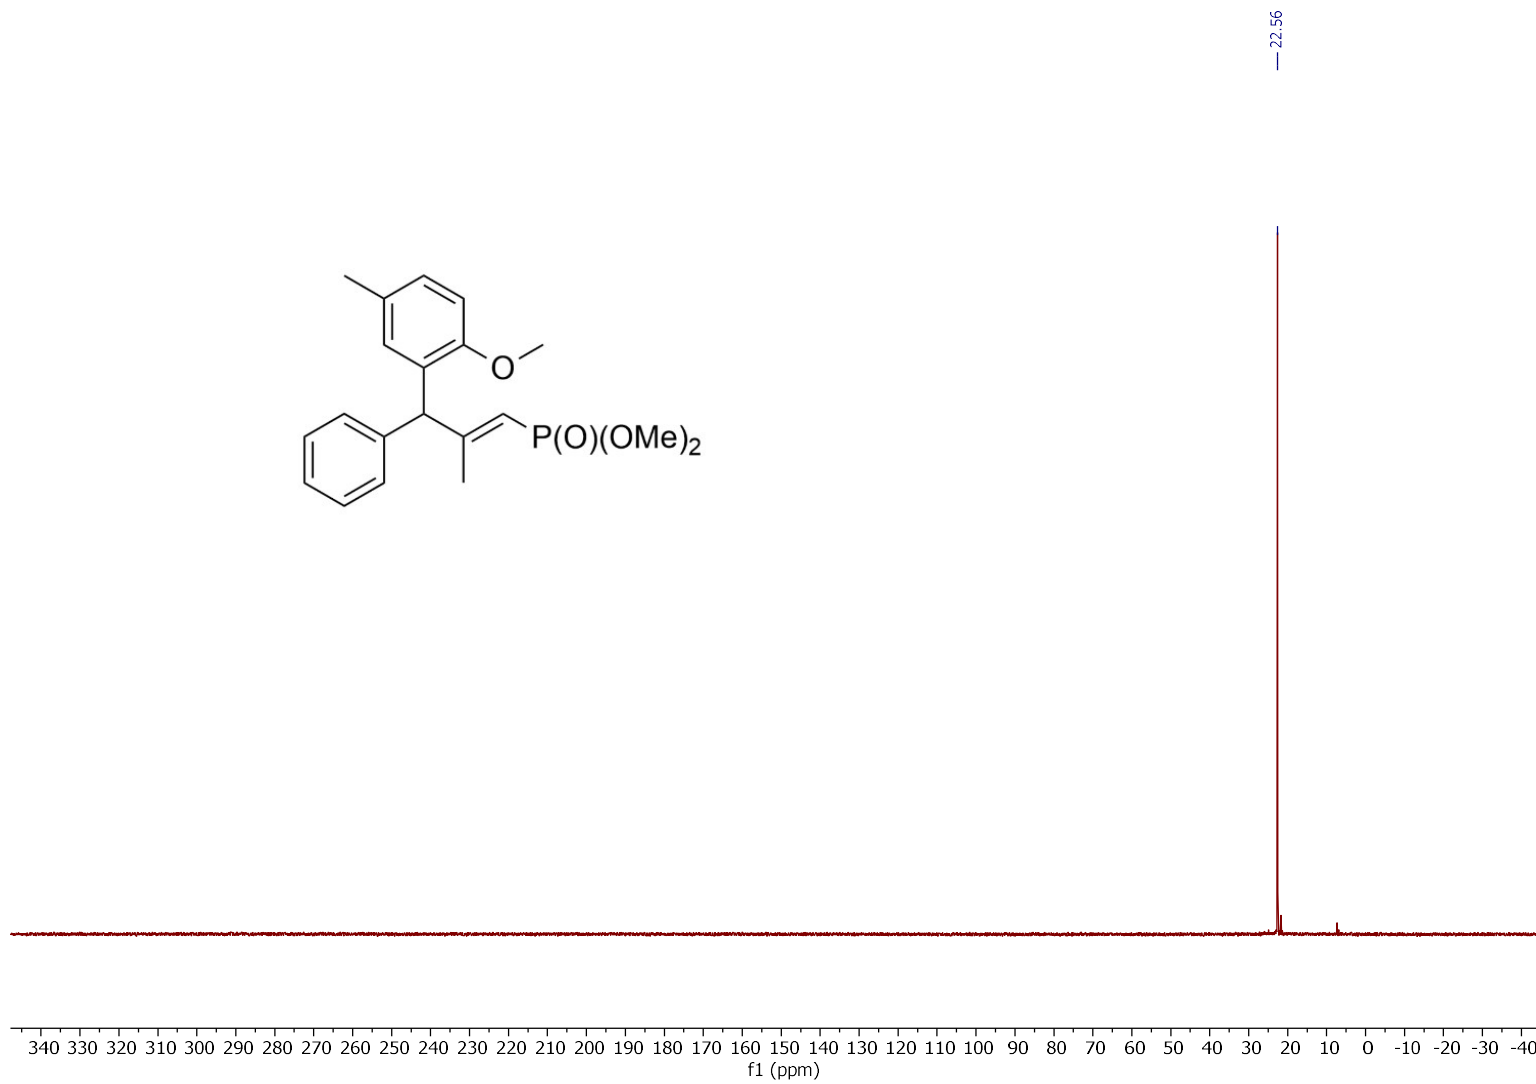

Figure S123:  $^{31}\text{P}\{^1\text{H}\}$  NMR Spectra of 5f in  $\text{CDCl}_3$

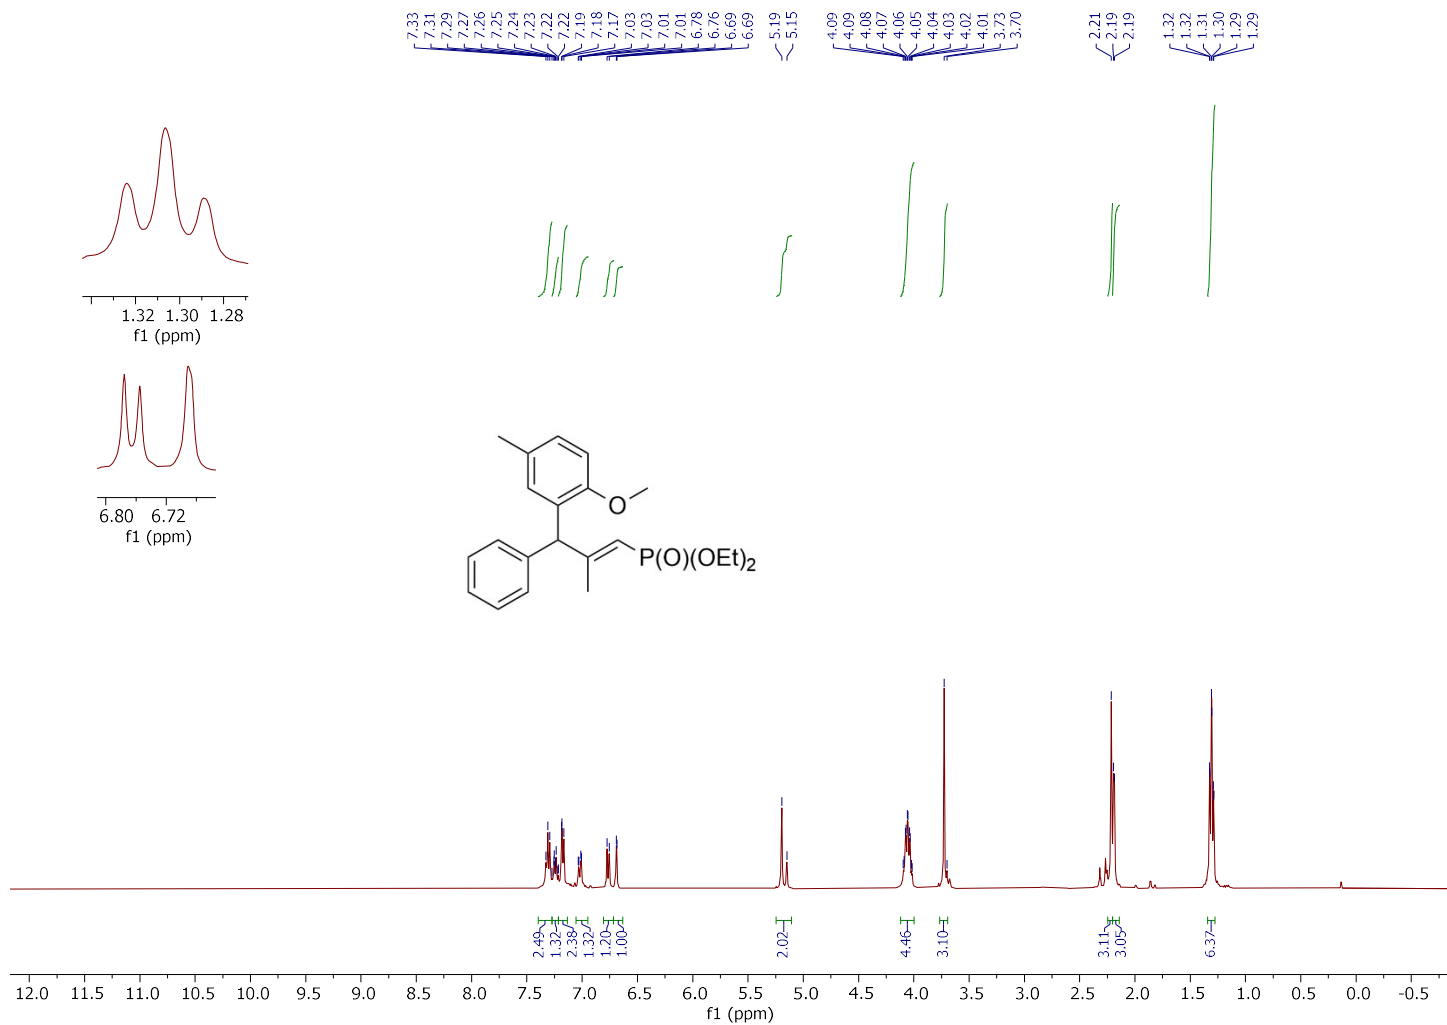

Figure S124:  $^1\text{H}$  NMR Spectra of 5g in  $\text{CDCl}_3$

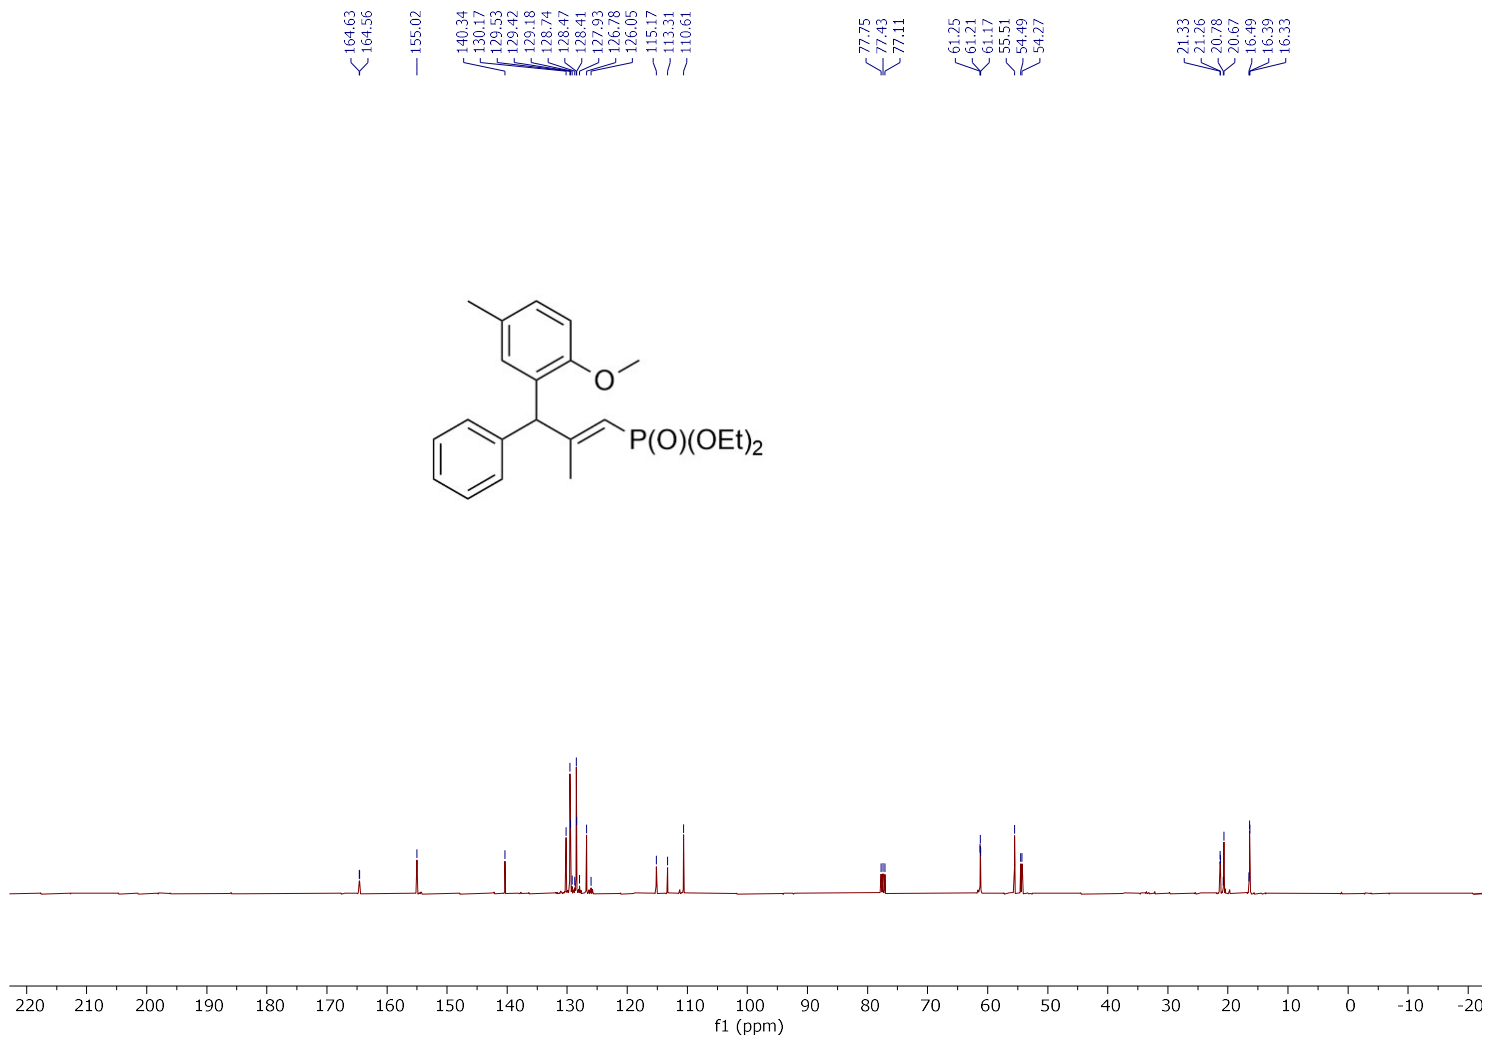

Figure S125:  $^{13}\text{C}\{^1\text{H}\}$  NMR Spectra of 5g in  $\text{CDCl}_3$

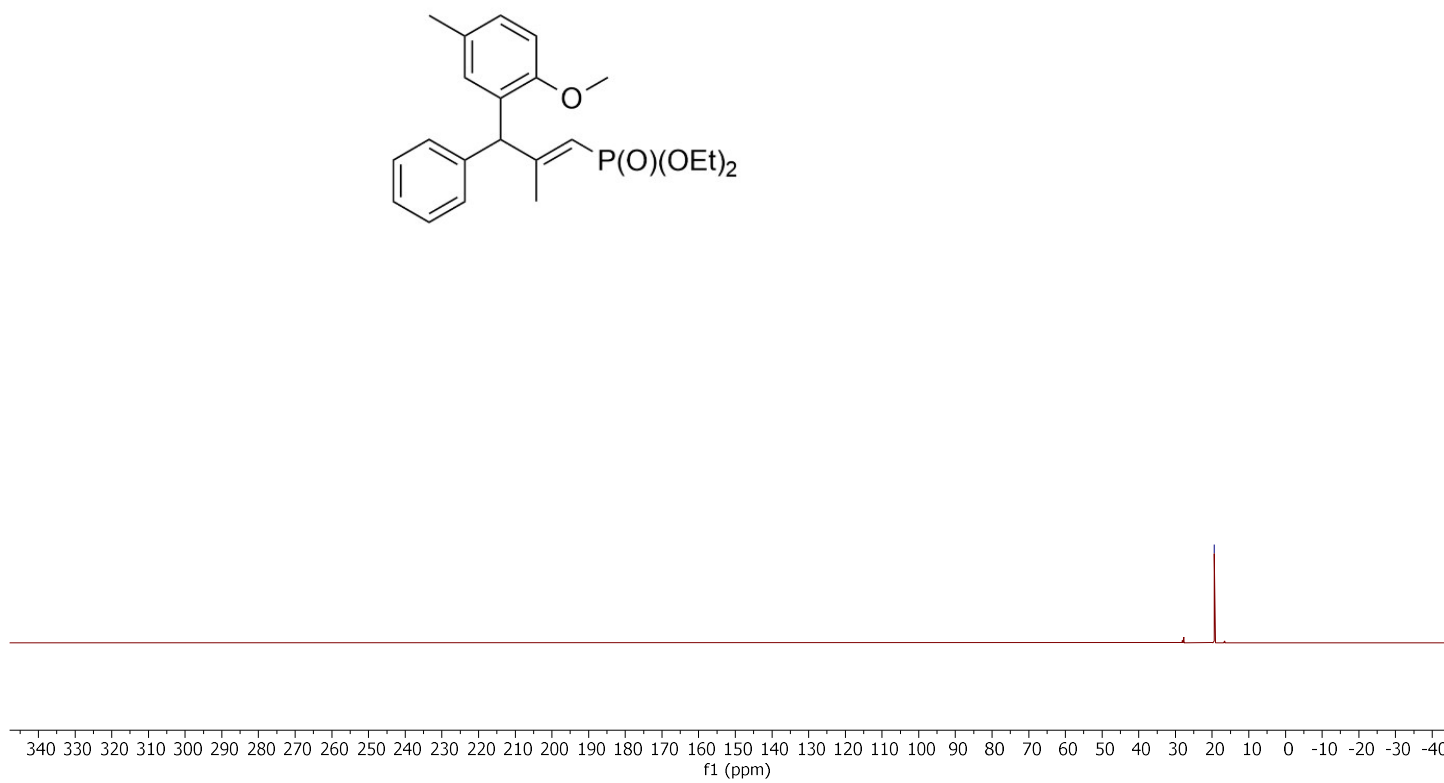

**Figure S126:**  $^{31}\text{P}\{^1\text{H}\}$  NMR Spectra of 5g in  $\text{CDCl}_3$

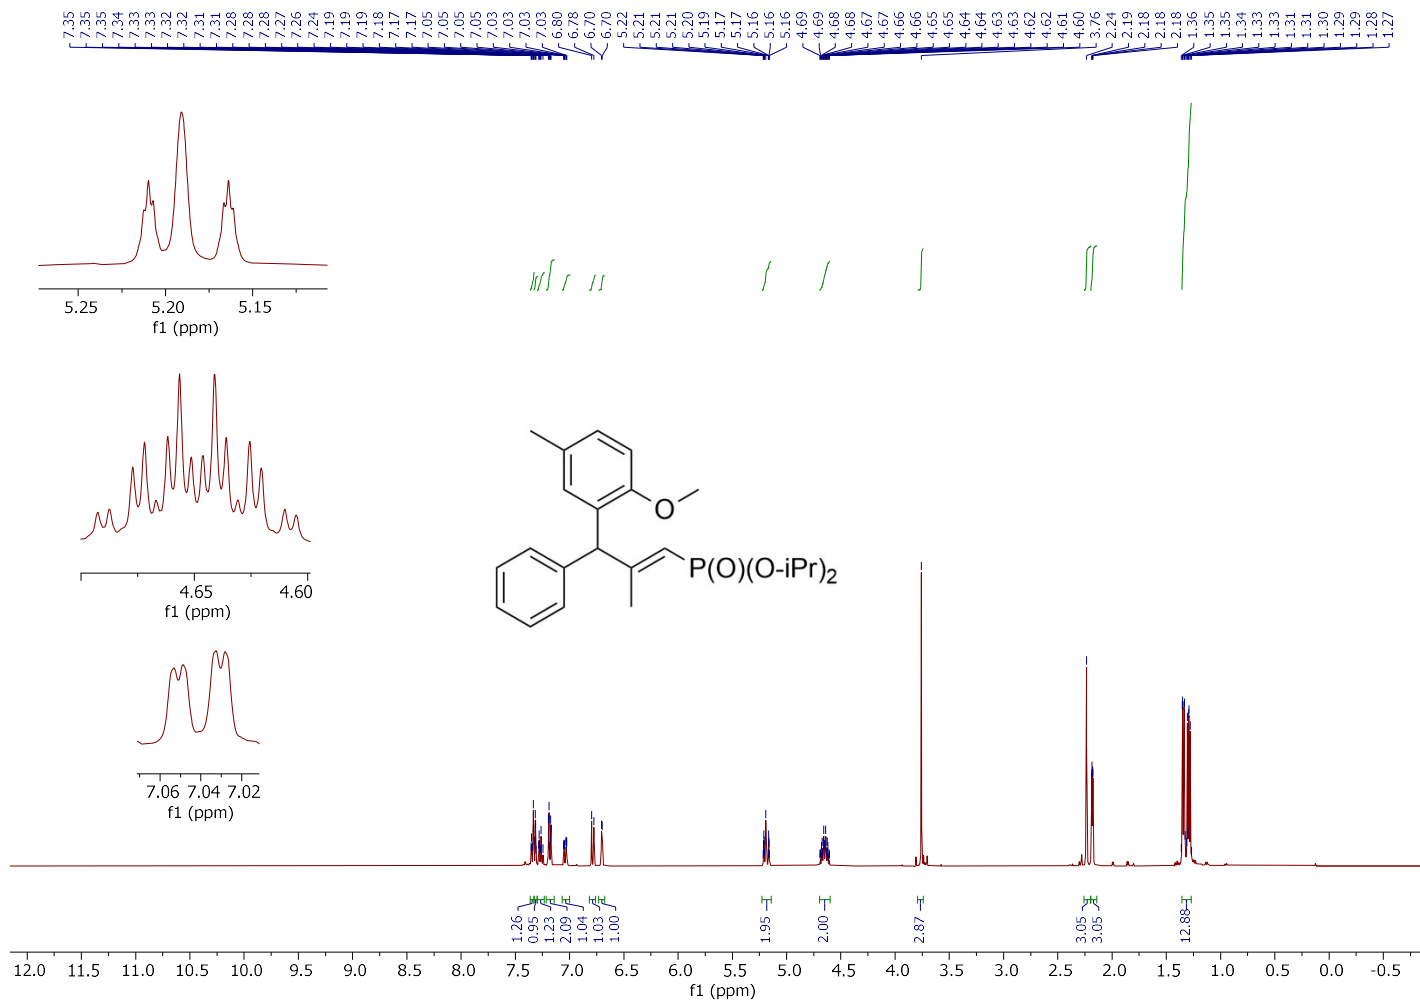

Figure S127:  $^1\text{H}$  NMR Spectra of 5h in  $\text{CDCl}_3$

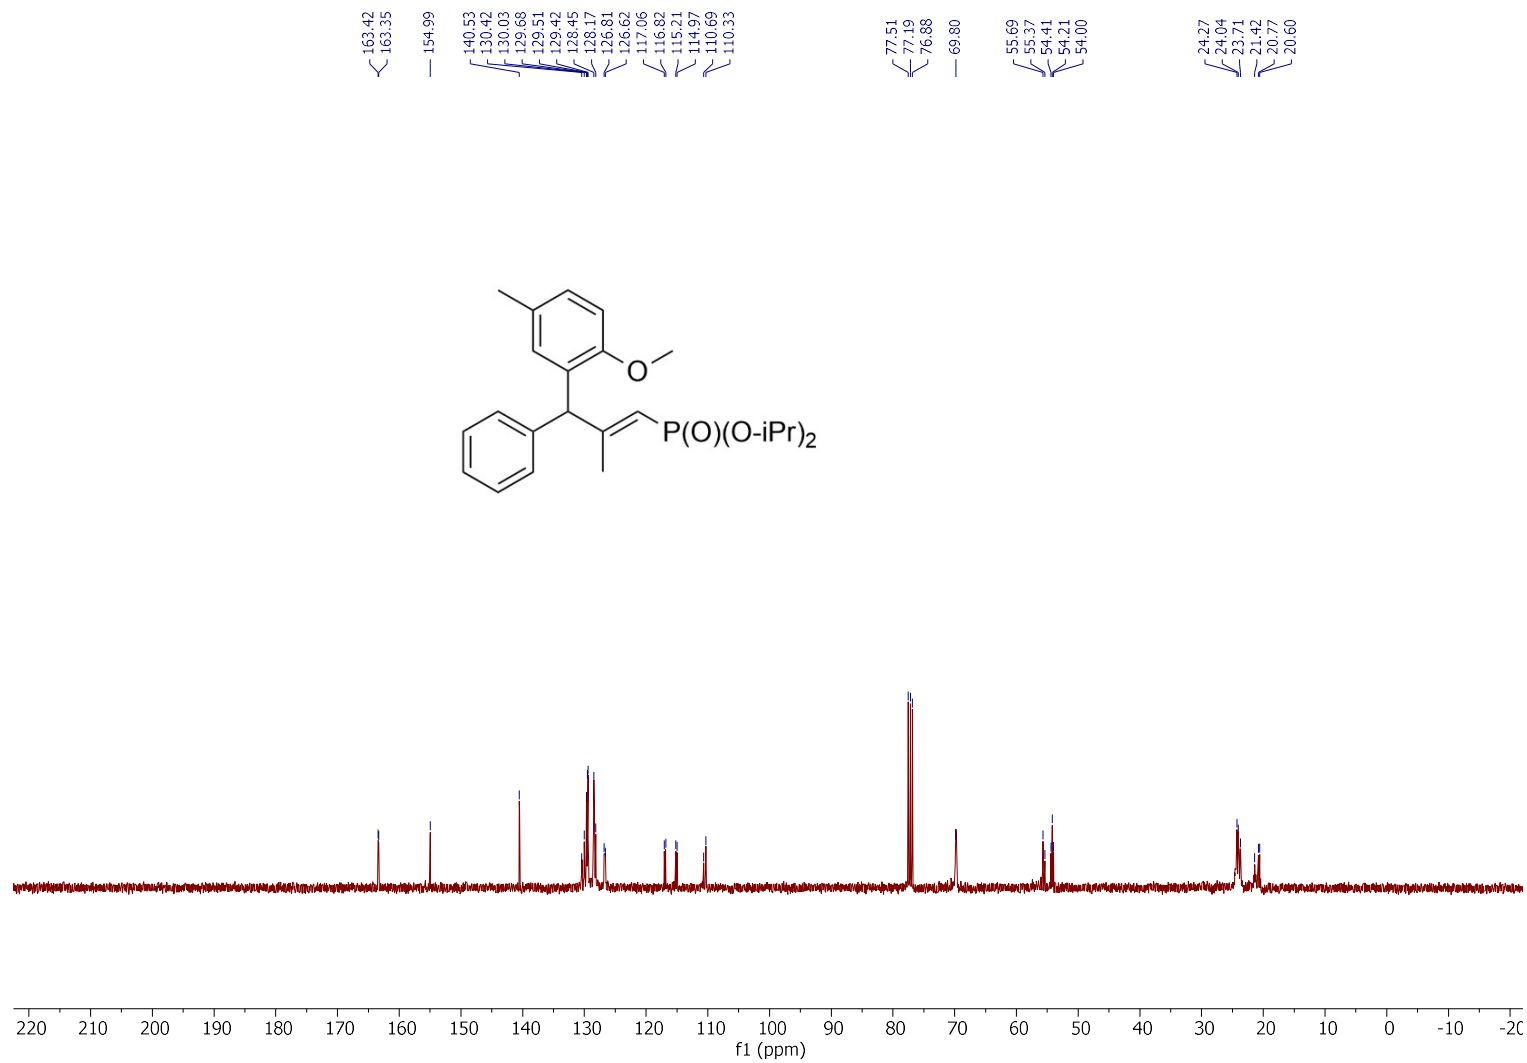

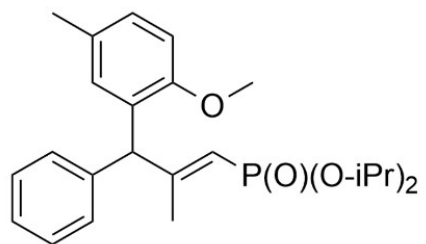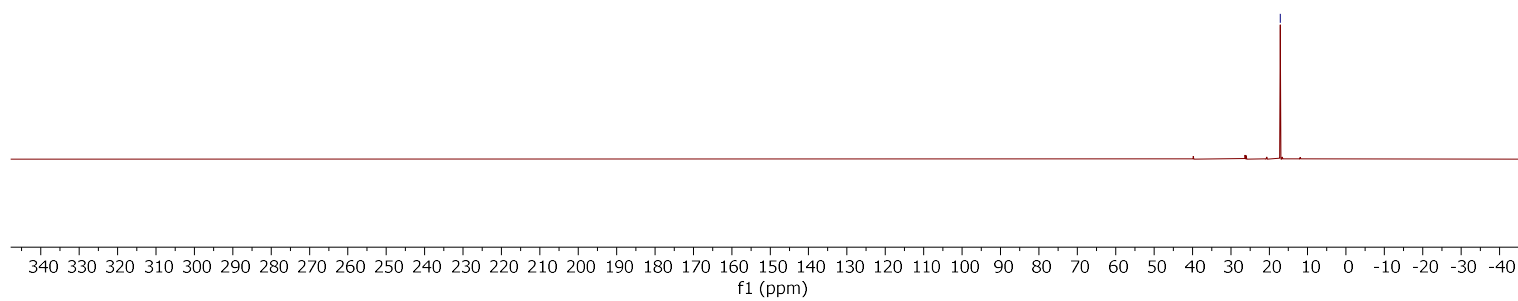

**Figure S129:**  $^{31}\text{P}\{^1\text{H}\}$  NMR Spectra of 5h in  $\text{CDCl}_3$

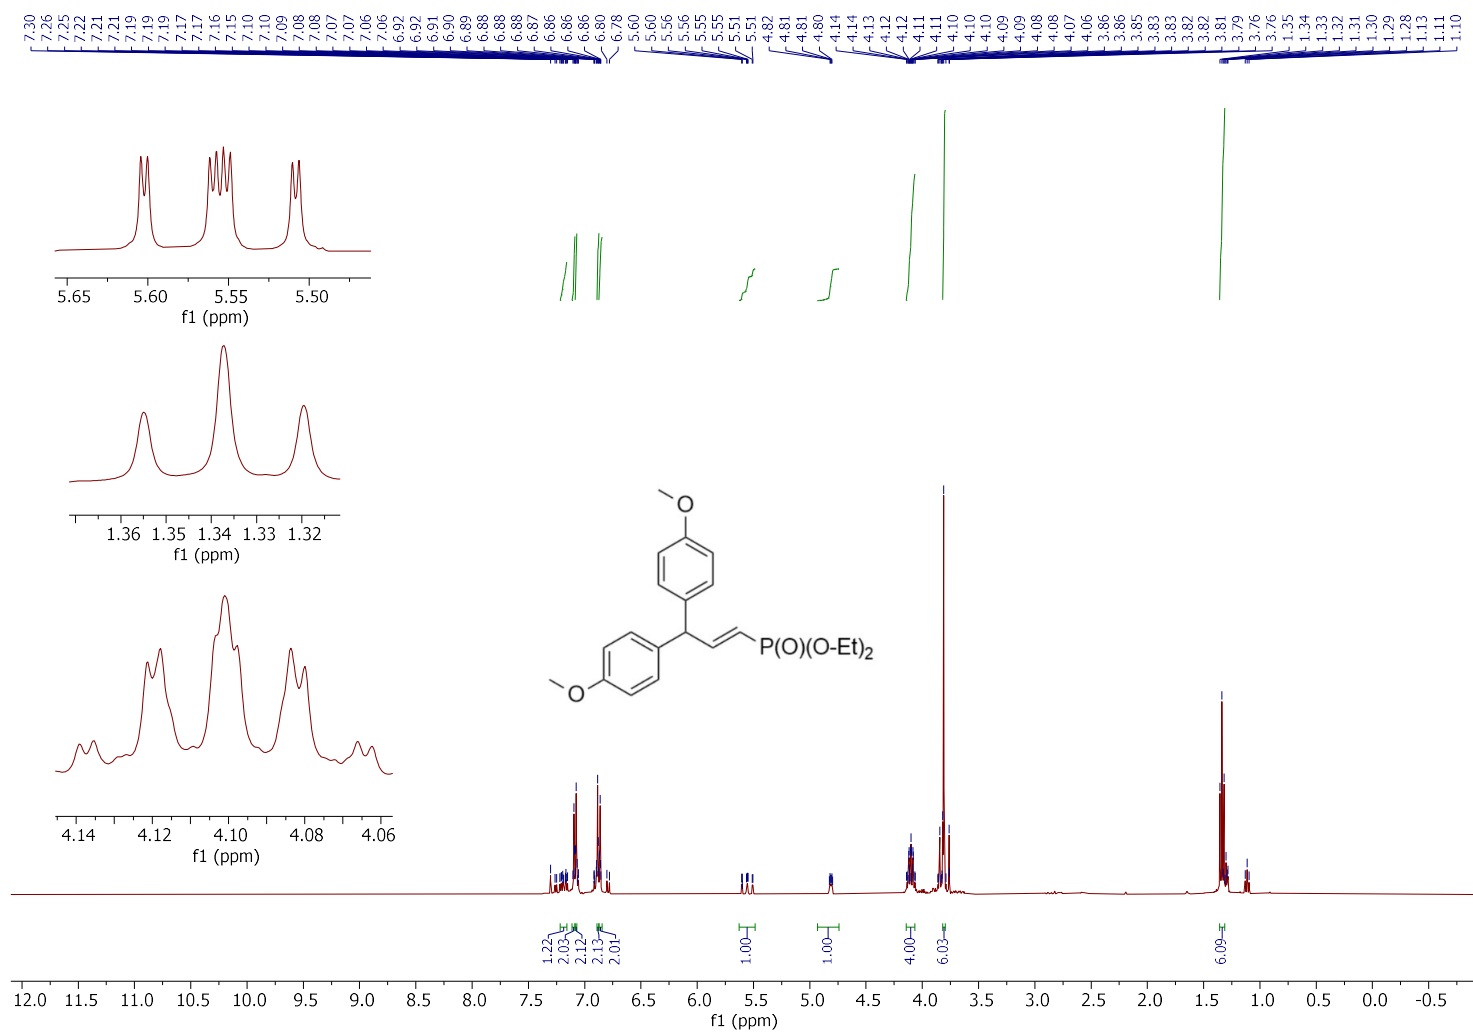

Figure S130:  $^1\text{H}$  NMR Spectra of 7a in  $\text{CDCl}_3$

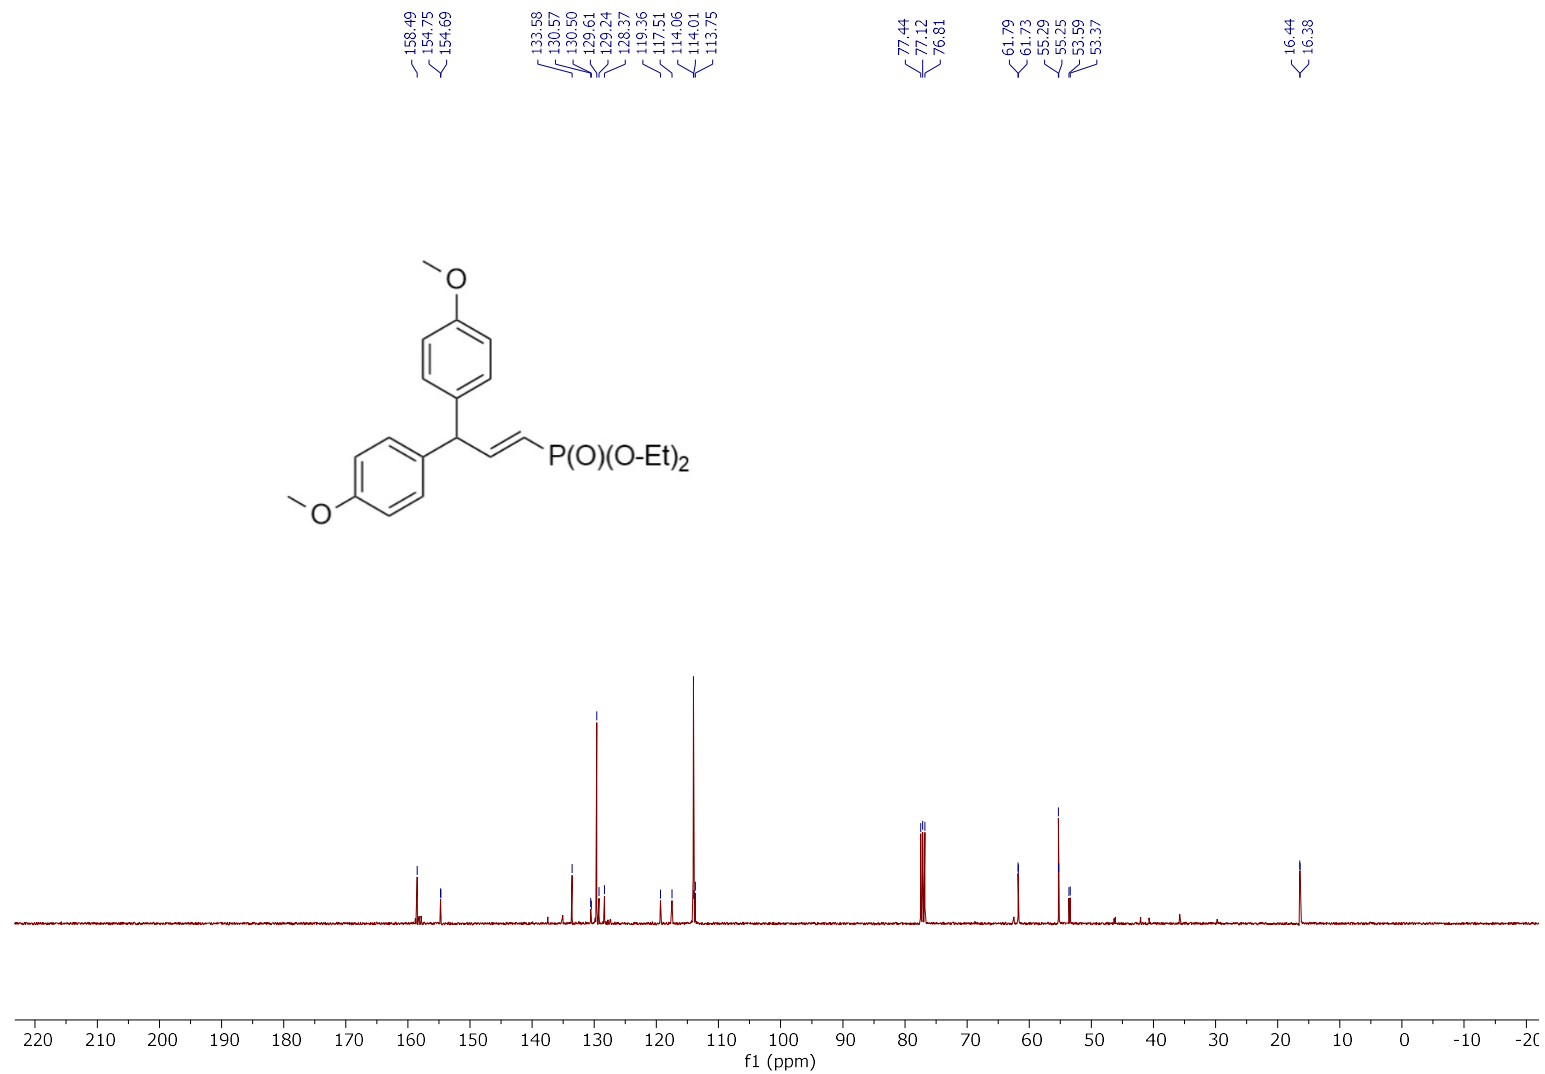

Figure S131:  $^{13}\text{C}\{^1\text{H}\}$  NMR Spectra of 7a in  $\text{CDCl}_3$

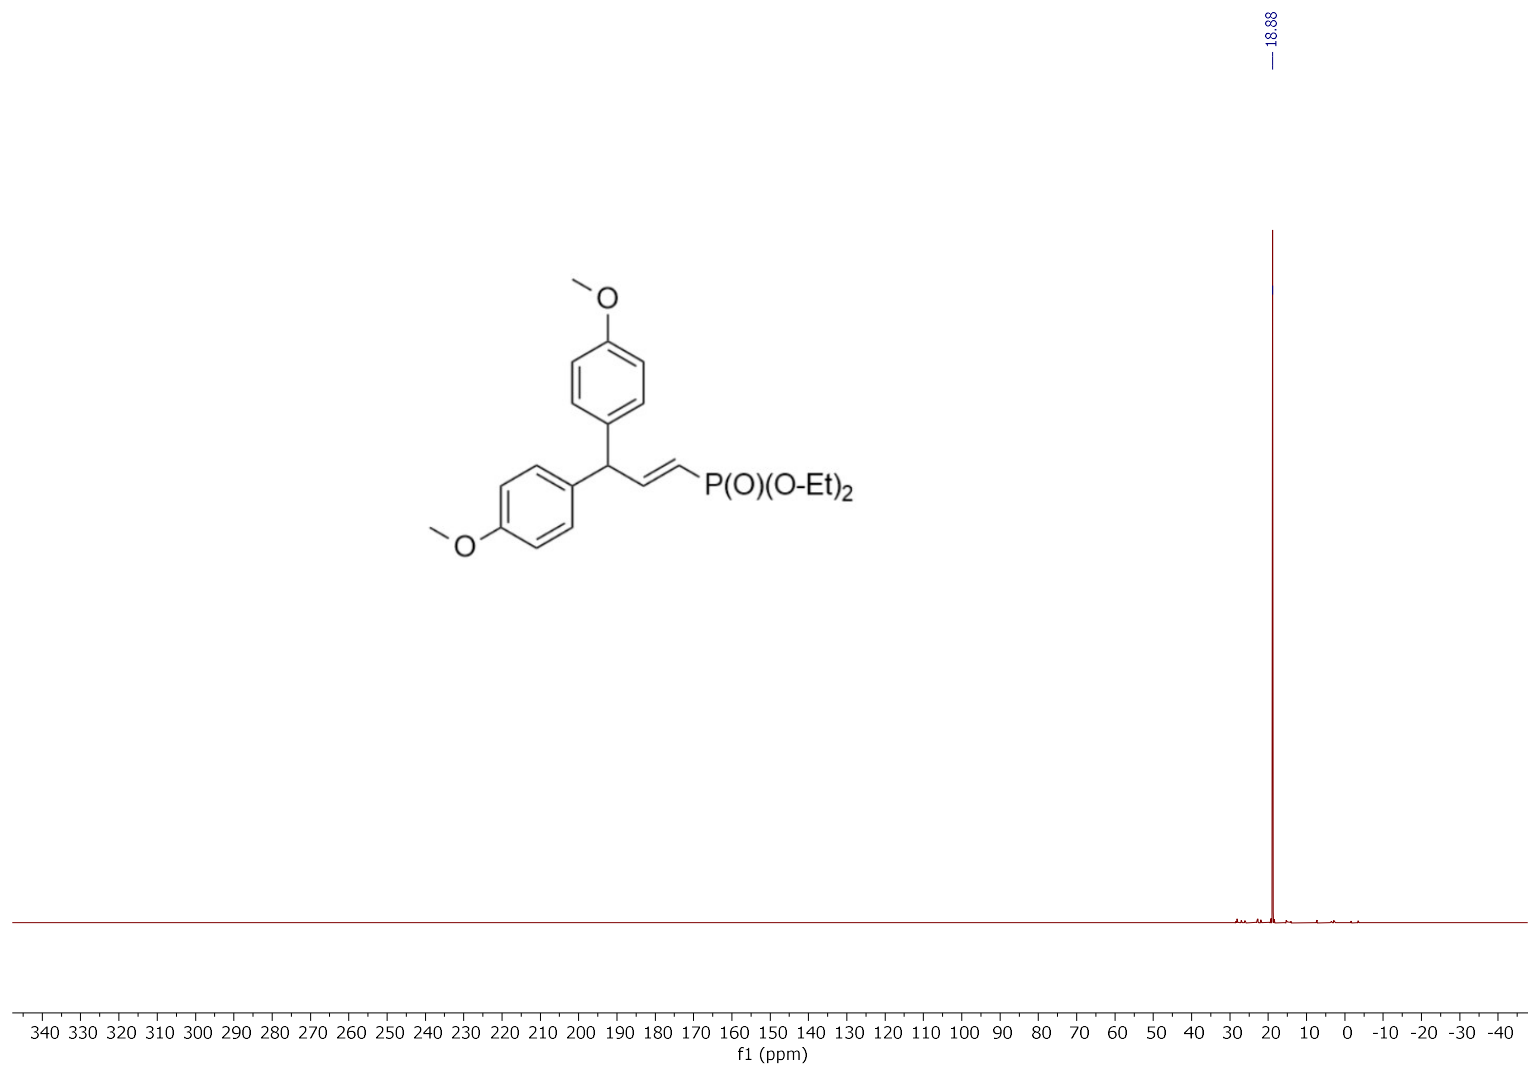

Figure S132:  $^{31}\text{P}\{^1\text{H}\}$  NMR Spectra of 7a in  $\text{CDCl}_3$

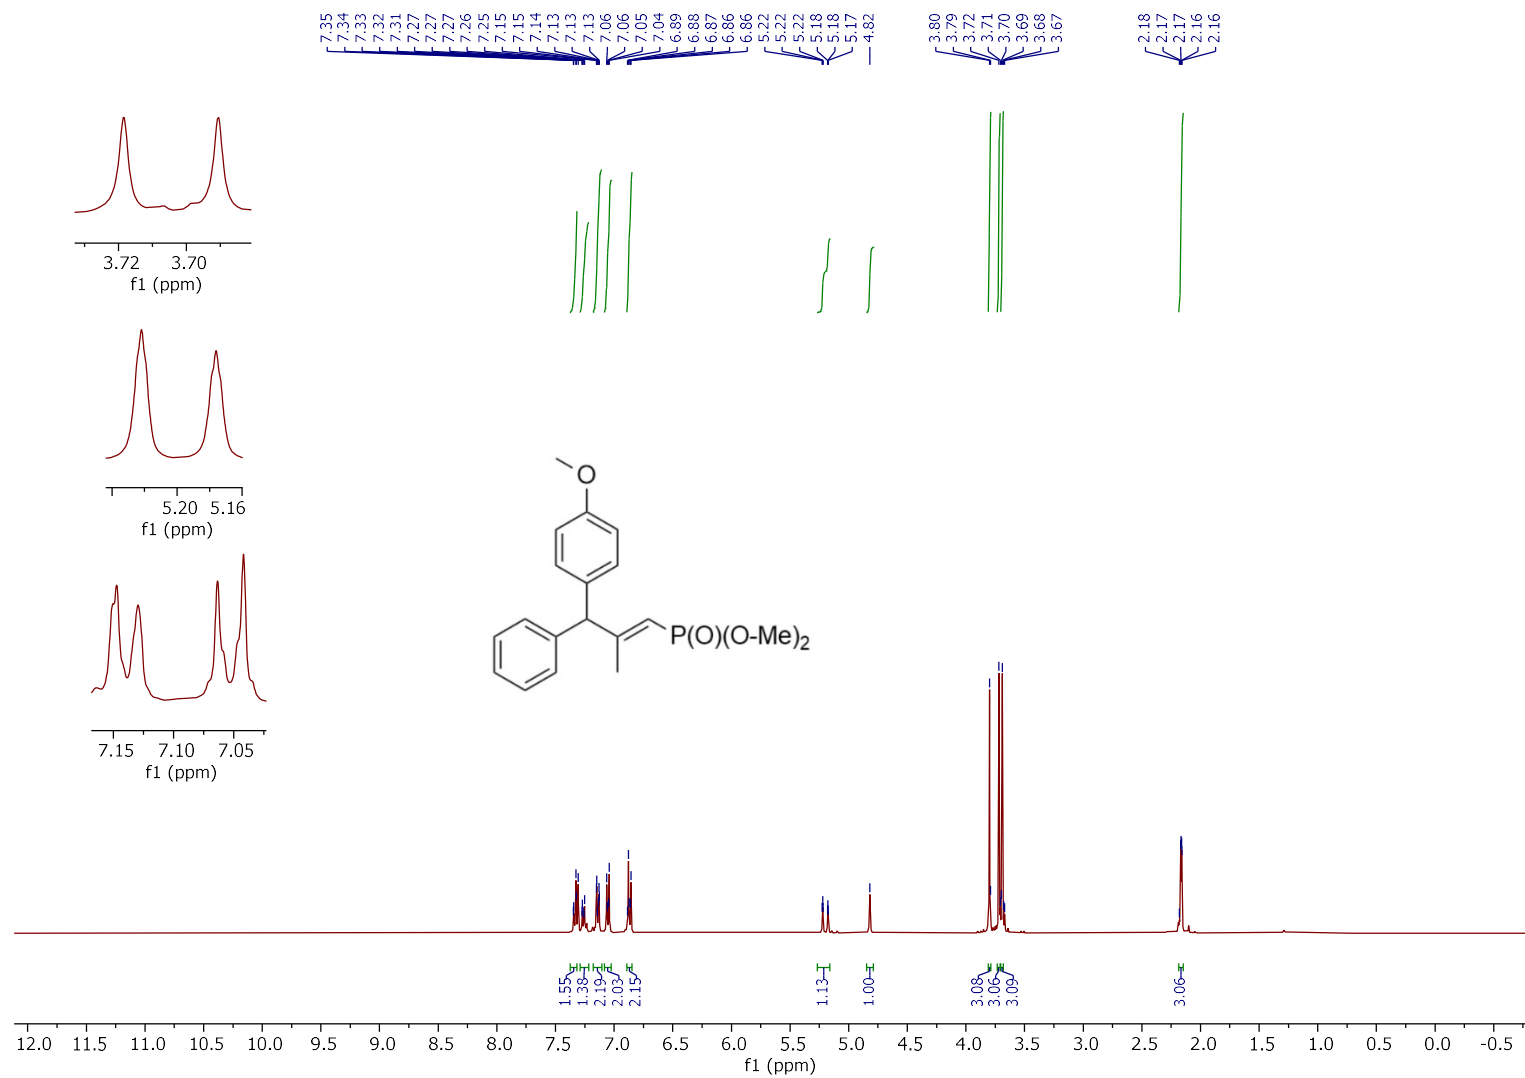

Figure S133:  $^1\text{H}$  NMR Spectra of 7b in  $\text{CDCl}_3$

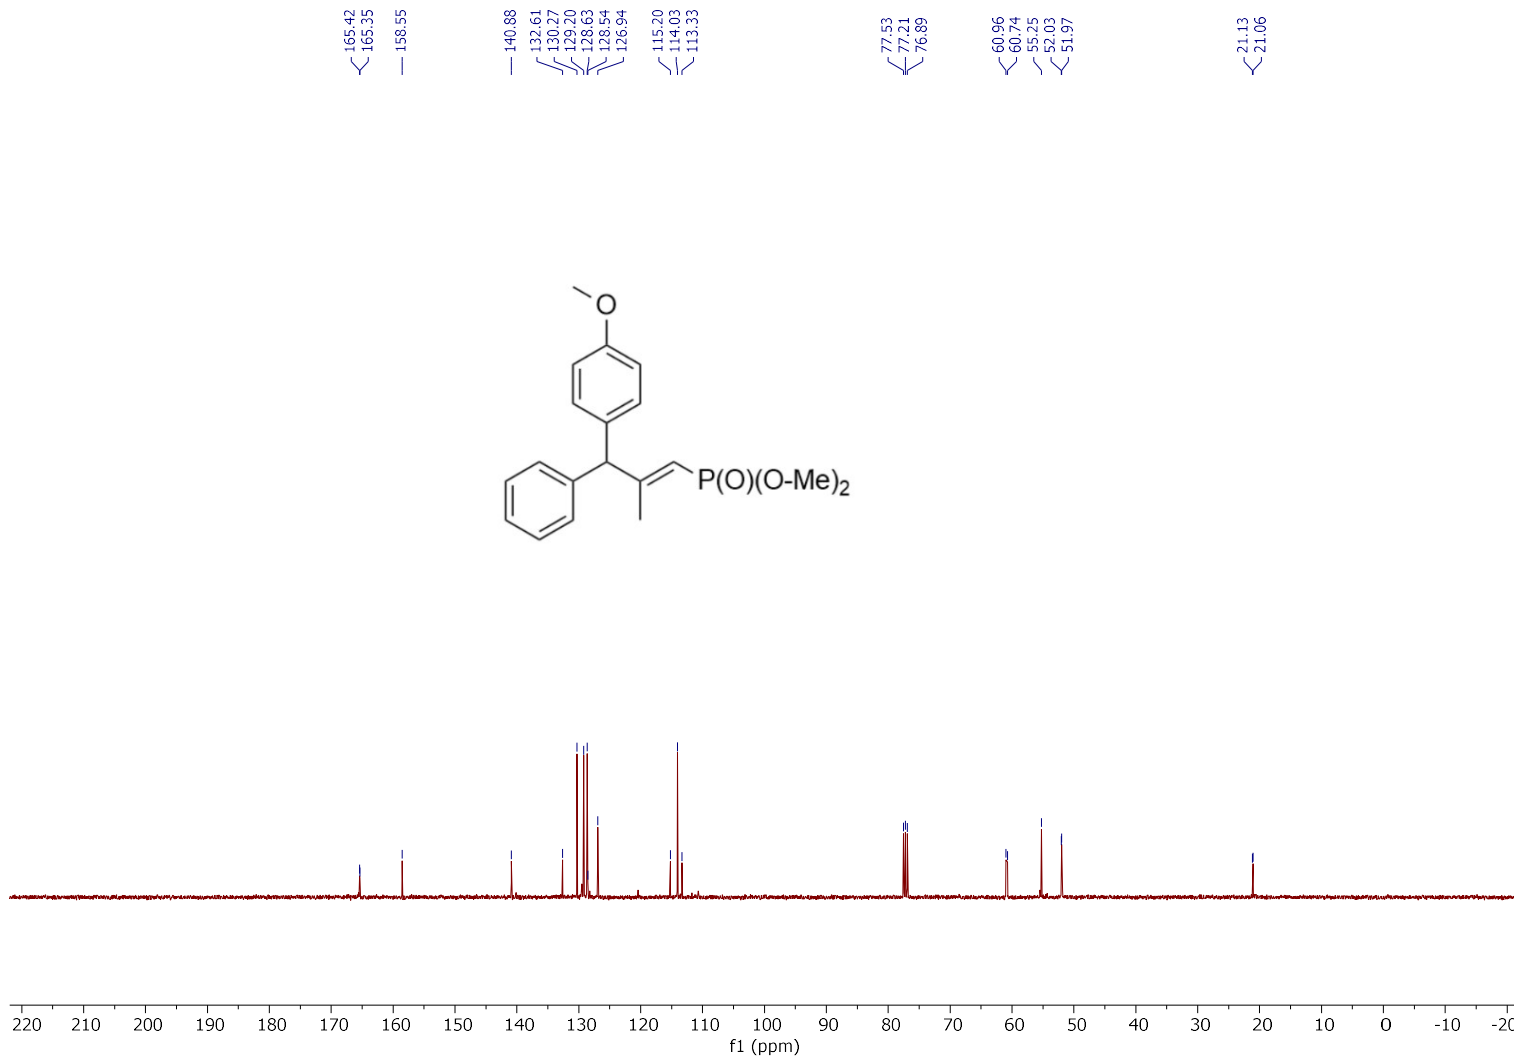

Figure S134:  $^{13}\text{C}\{^1\text{H}\}$  NMR Spectra of 7b in  $\text{CDCl}_3$

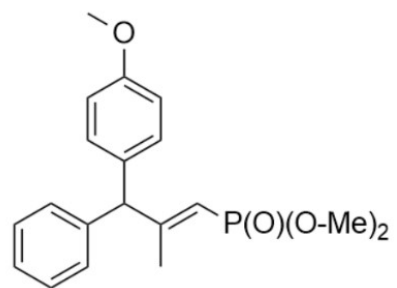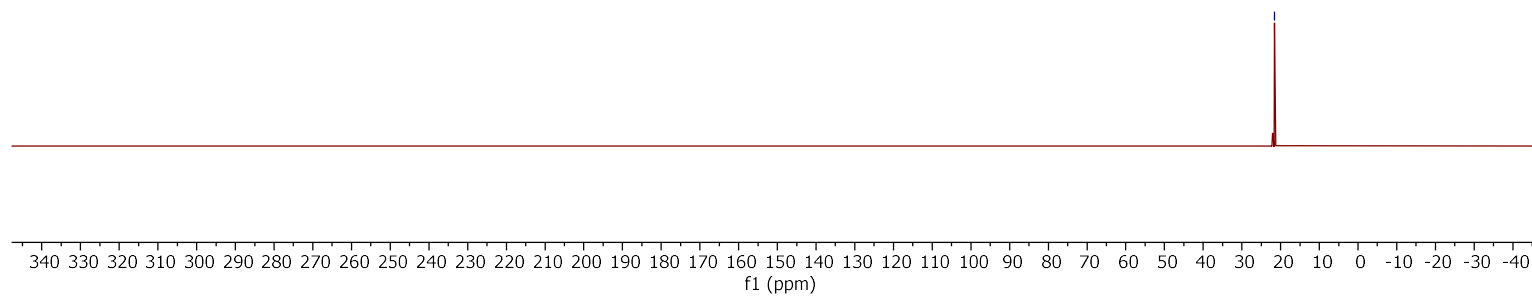

**Figure S135:  $^{31}\text{P}\{^1\text{H}\}$  NMR Spectra of 7b in  $\text{CDCl}_3$**

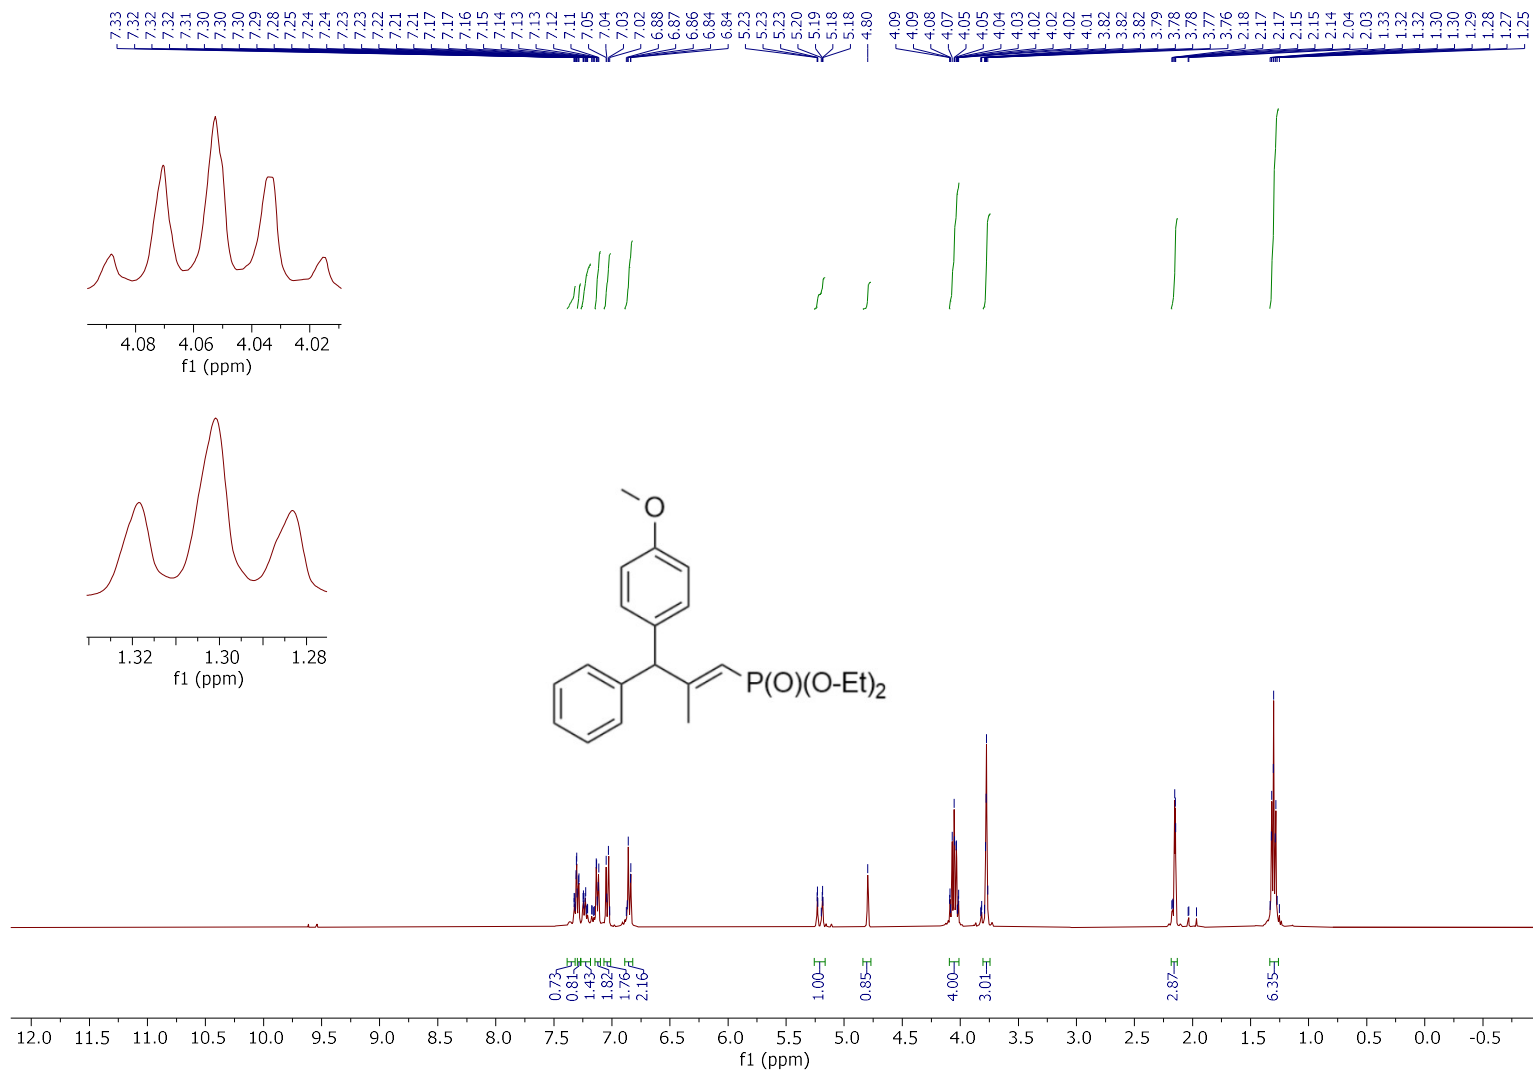

Figure S136:  $^1\text{H}$  NMR Spectra of 7c in  $\text{CDCl}_3$

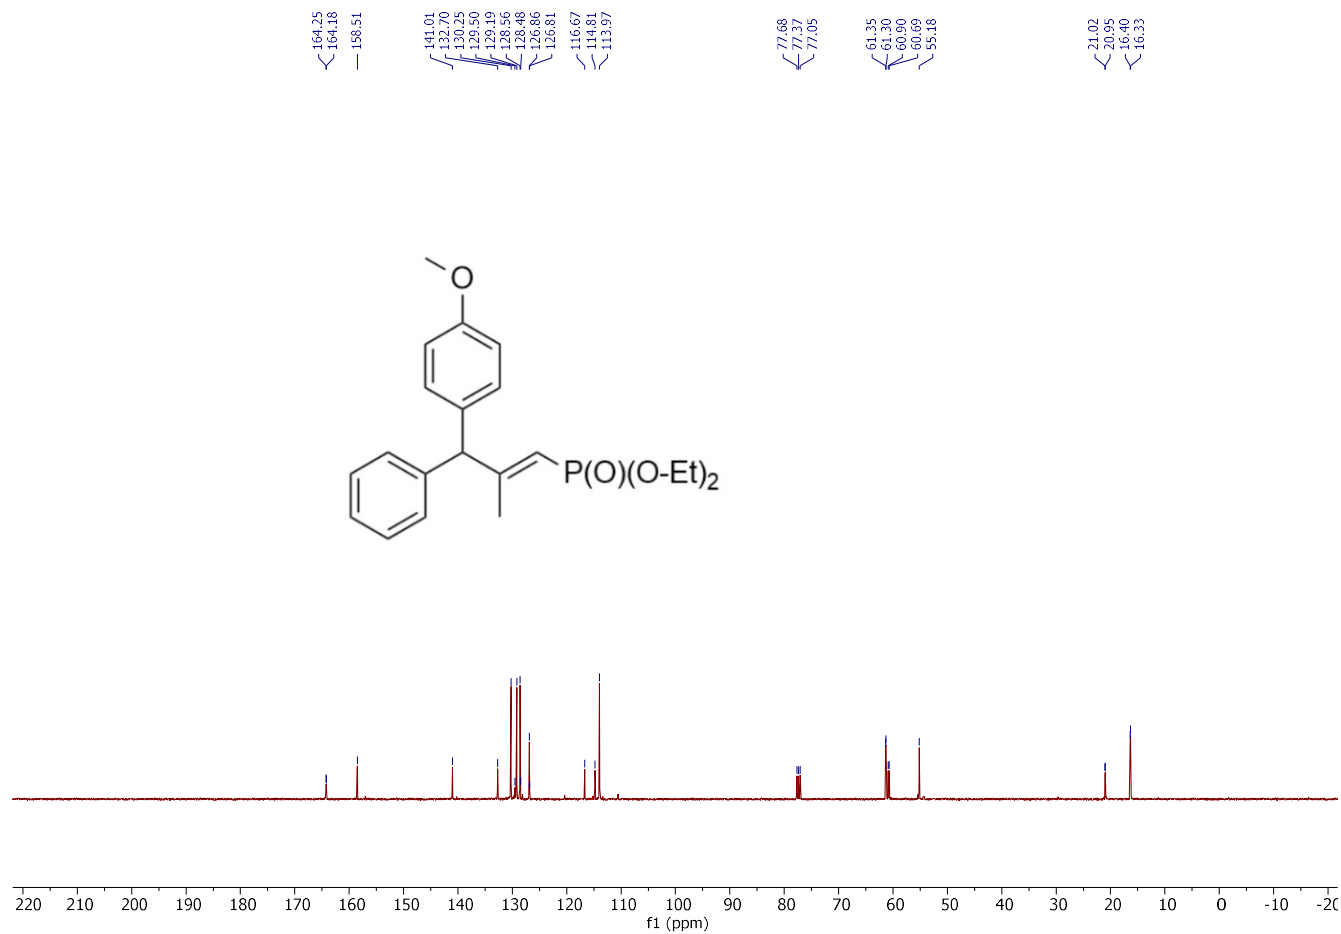

Figure S137:  $^{13}\text{C}\{^1\text{H}\}$  NMR Spectra of 7c in  $\text{CDCl}_3$

— 18.80

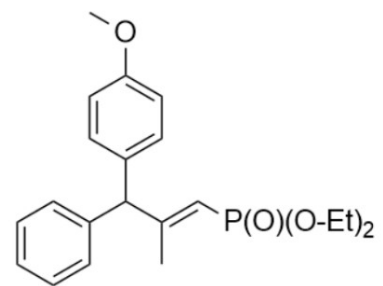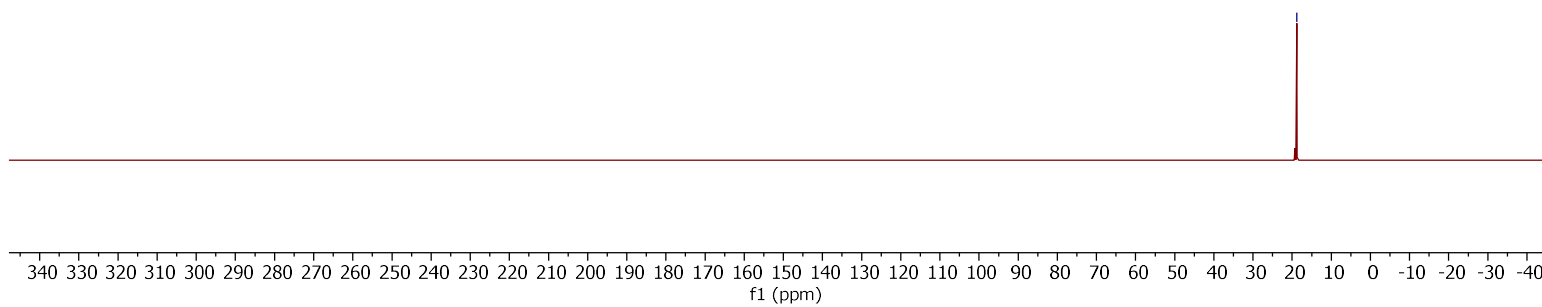

**Figure S138:**  $^{31}\text{P}\{^1\text{H}\}$  NMR Spectra of **7c** in  $\text{CDCl}_3$



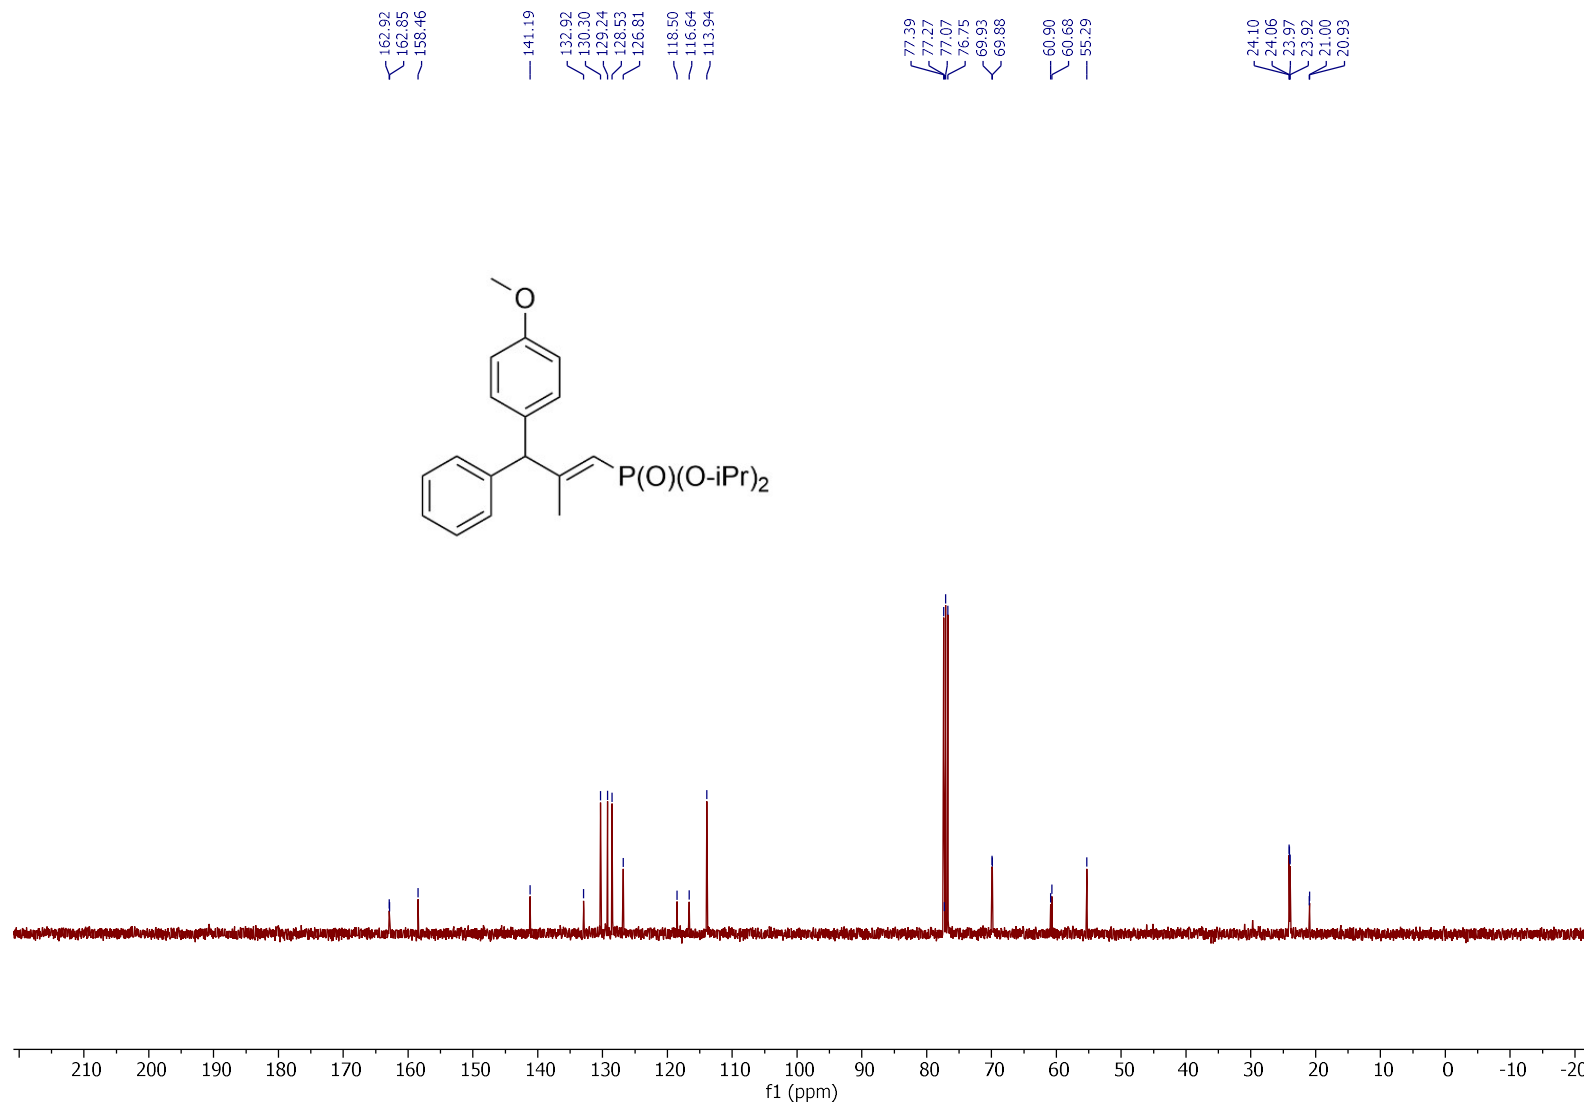

Figure S140:  $^{13}\text{C}\{^1\text{H}\}$  NMR Spectra of 7d in  $\text{CDCl}_3$

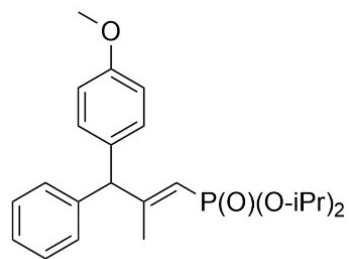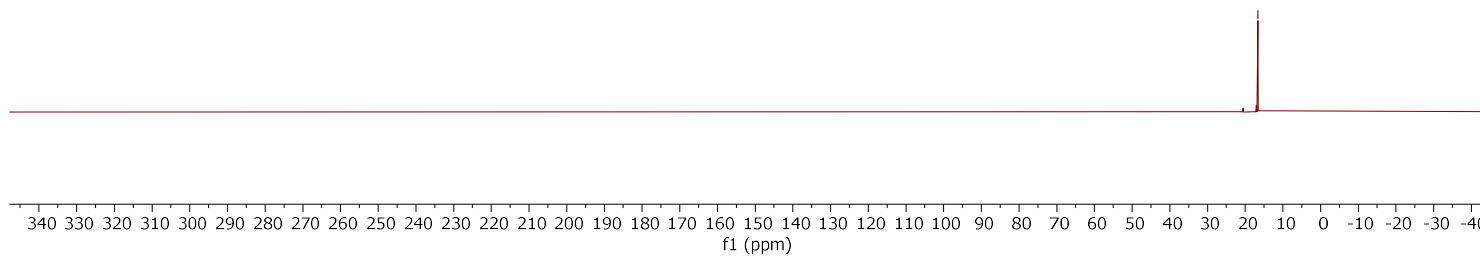

Figure S141:  $^{31}\text{P}\{^1\text{H}\}$  NMR Spectra of 7d in  $\text{CDCl}_3$

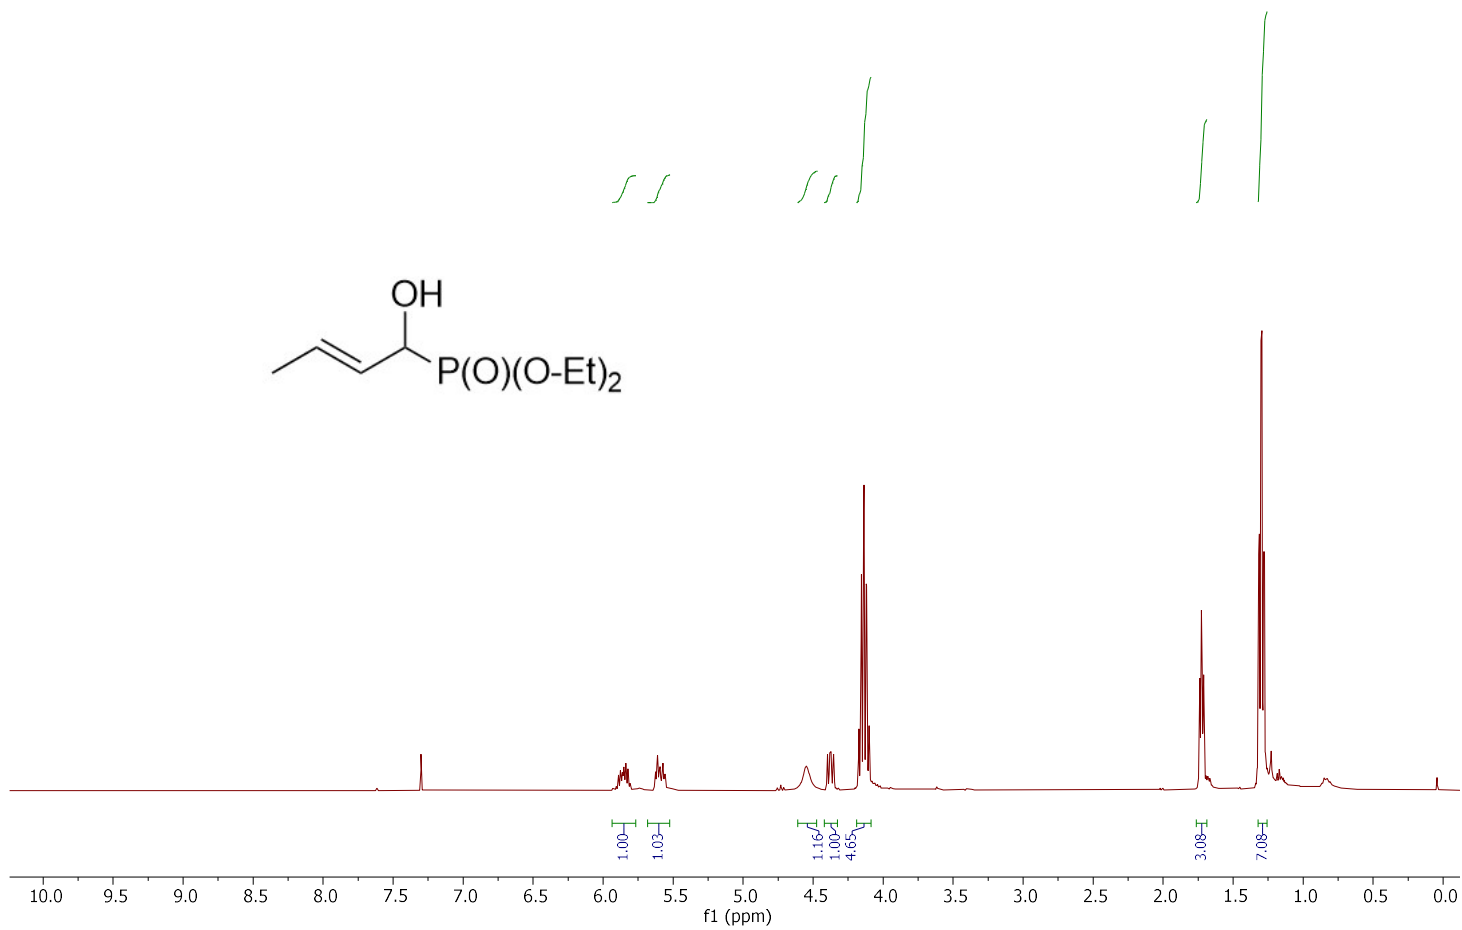

Figure S142: <sup>1</sup>H NMR Spectra of 1aa in CDCl<sub>3</sub>

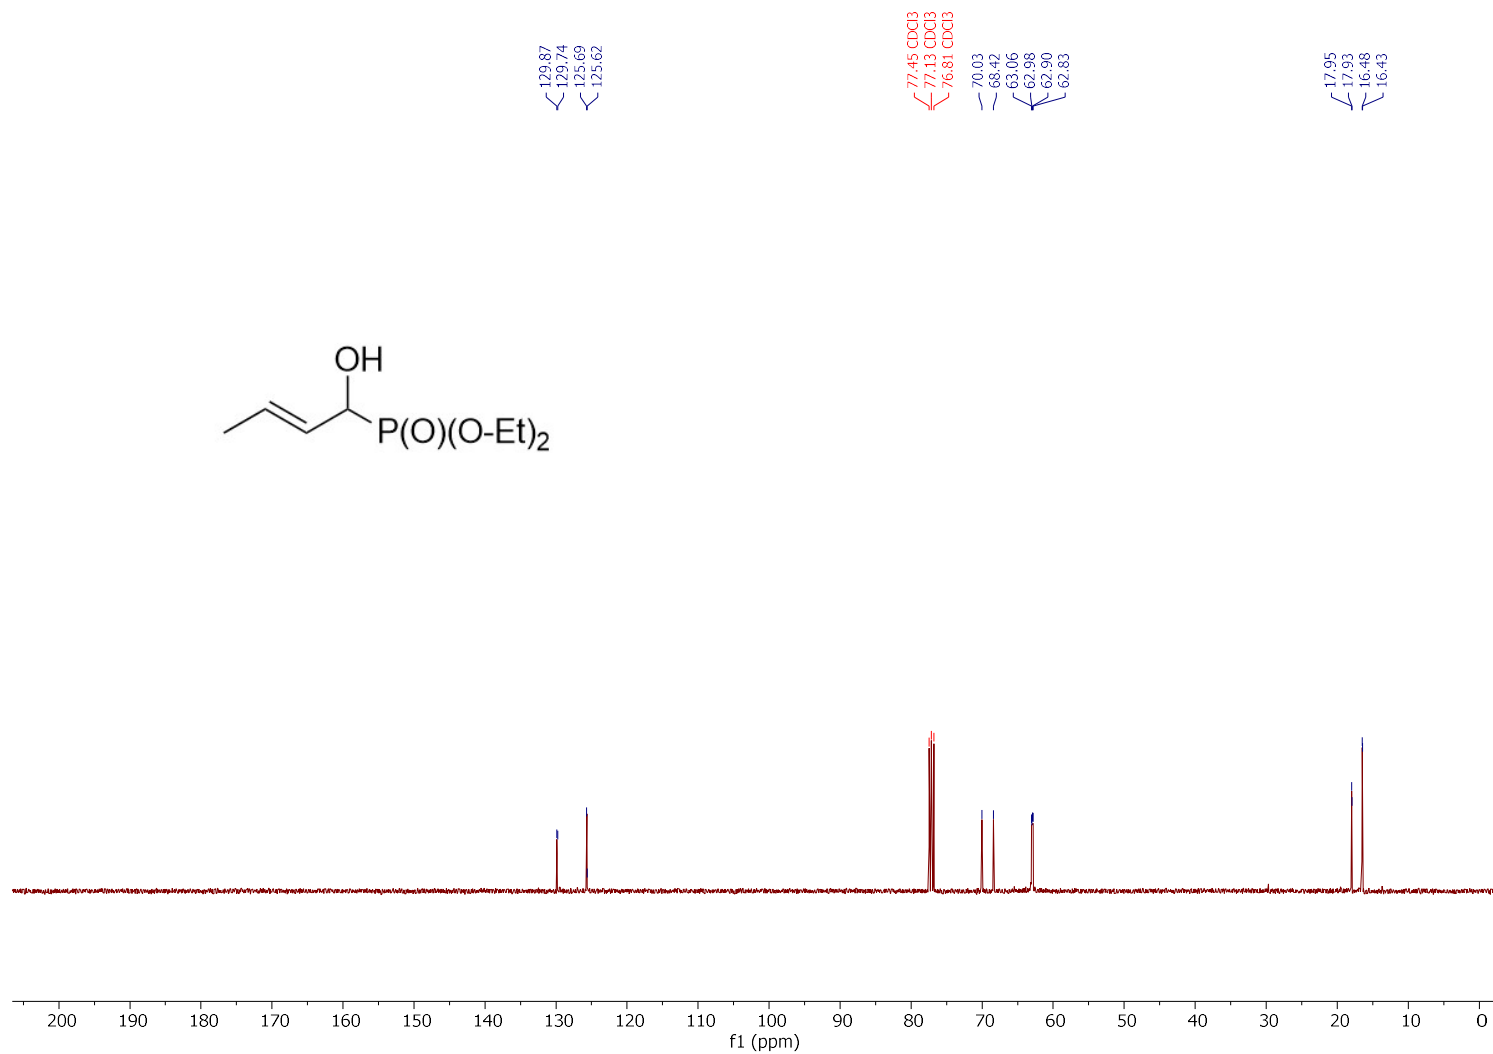

Figure S143:  $^{13}\text{C}\{^1\text{H}\}$  NMR Spectra of 1aa in  $\text{CDCl}_3$

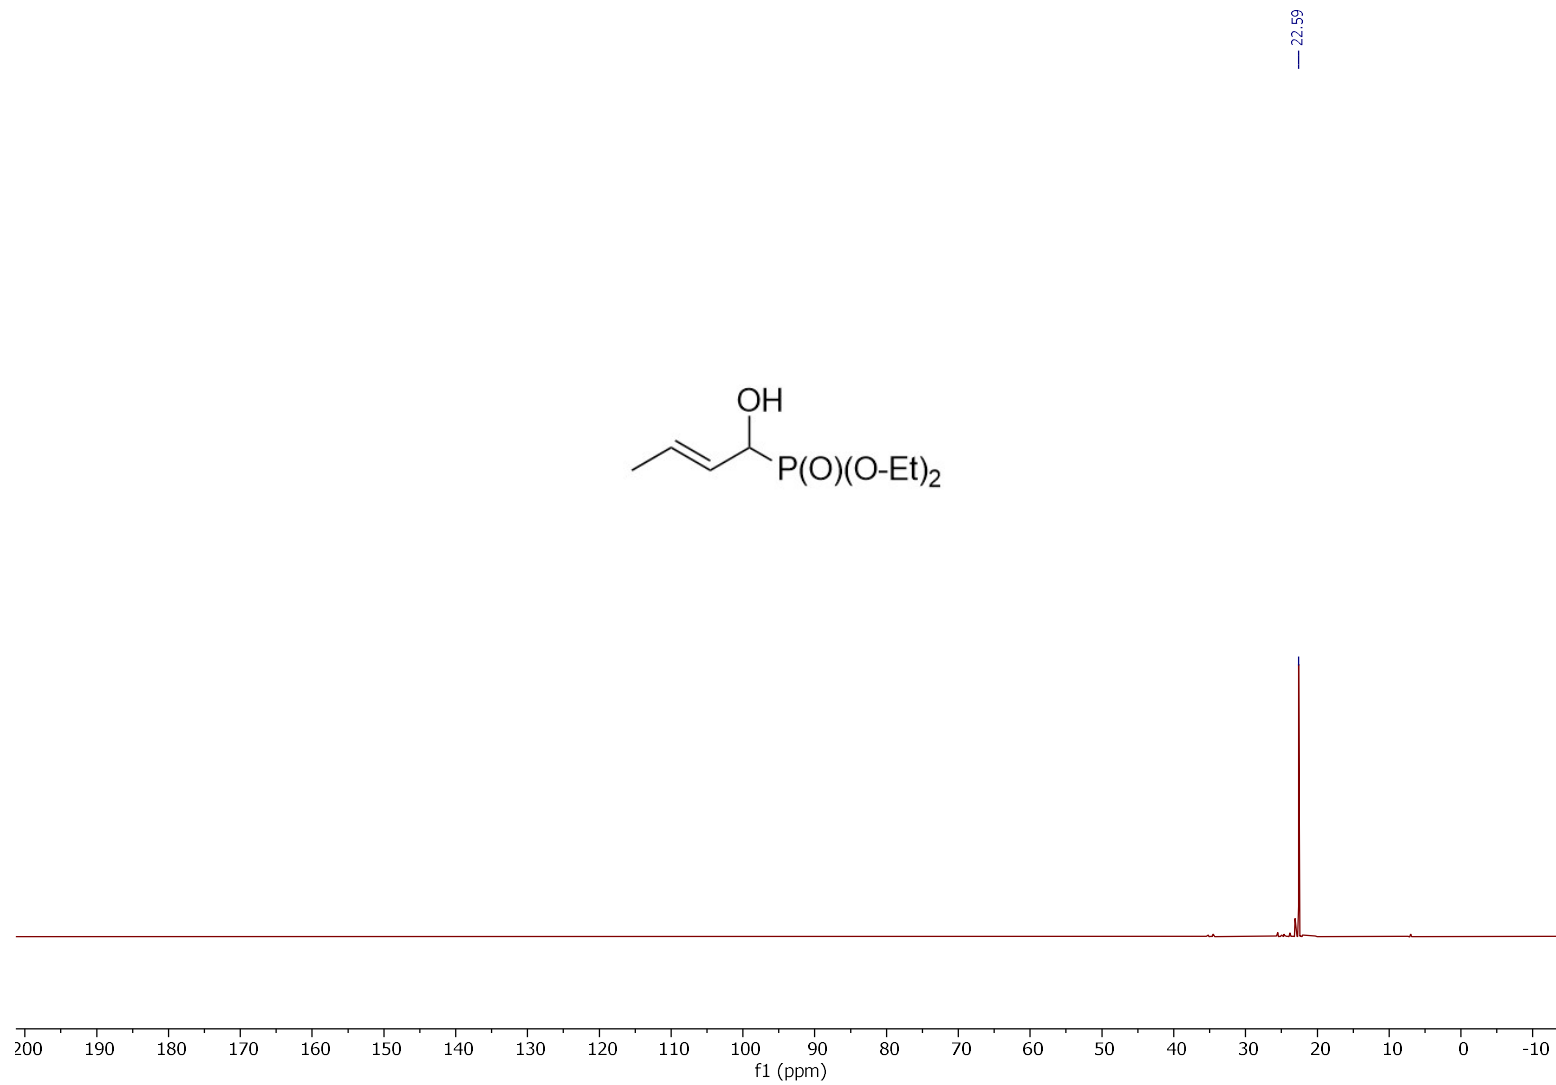

**Figure S144:**  $^{31}\text{P}\{^1\text{H}\}$  NMR Spectra of 1aa in  $\text{CDCl}_3$

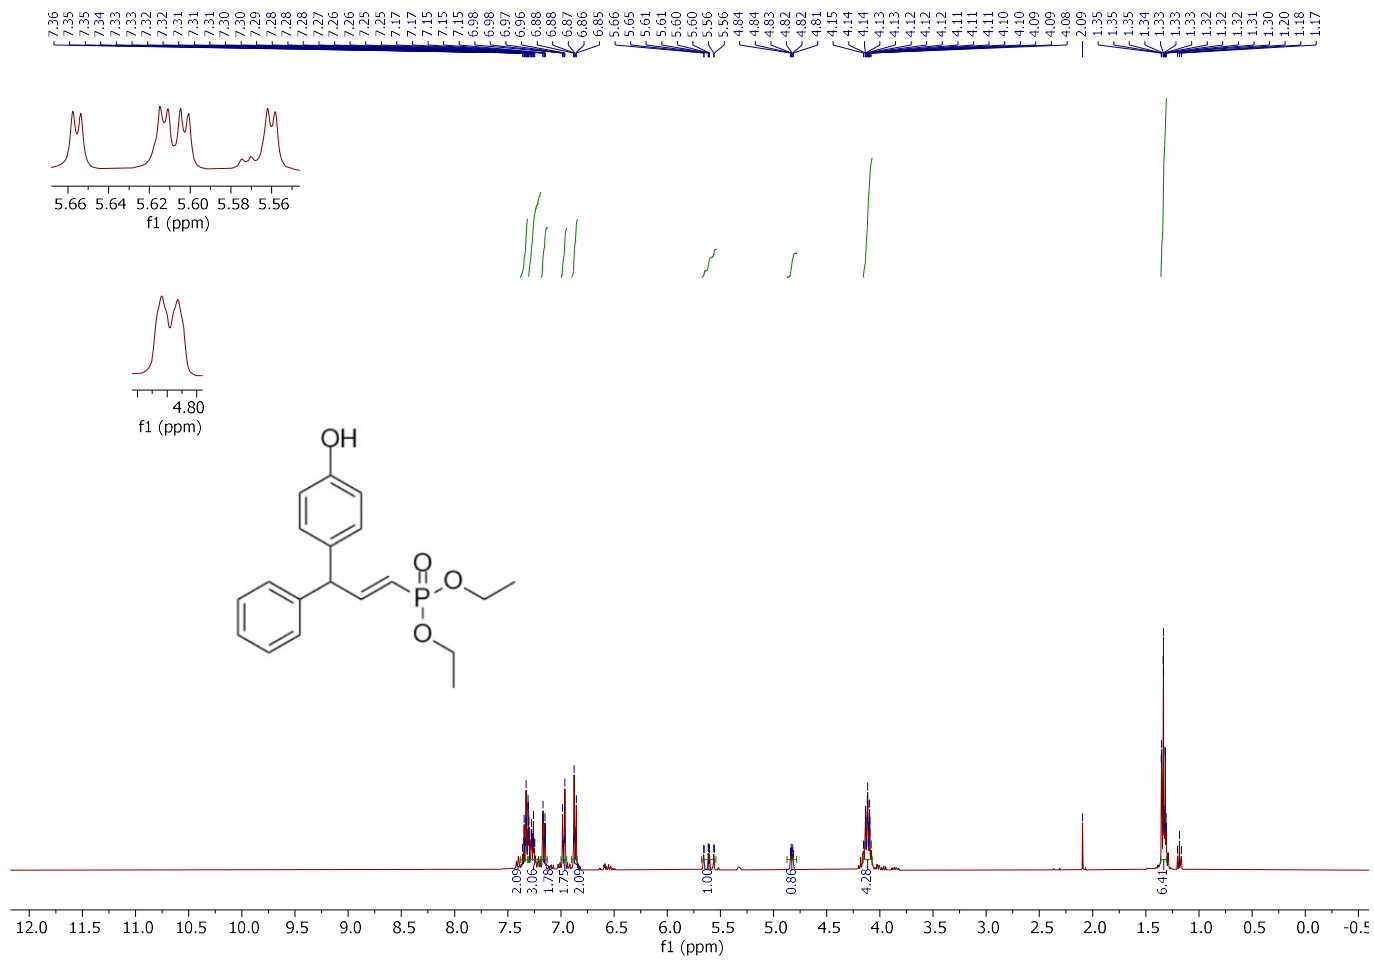

Figure S145: <sup>1</sup>H NMR Spectra of products of the reaction of Phenol with 1a in TFA in CDCl<sub>3</sub>

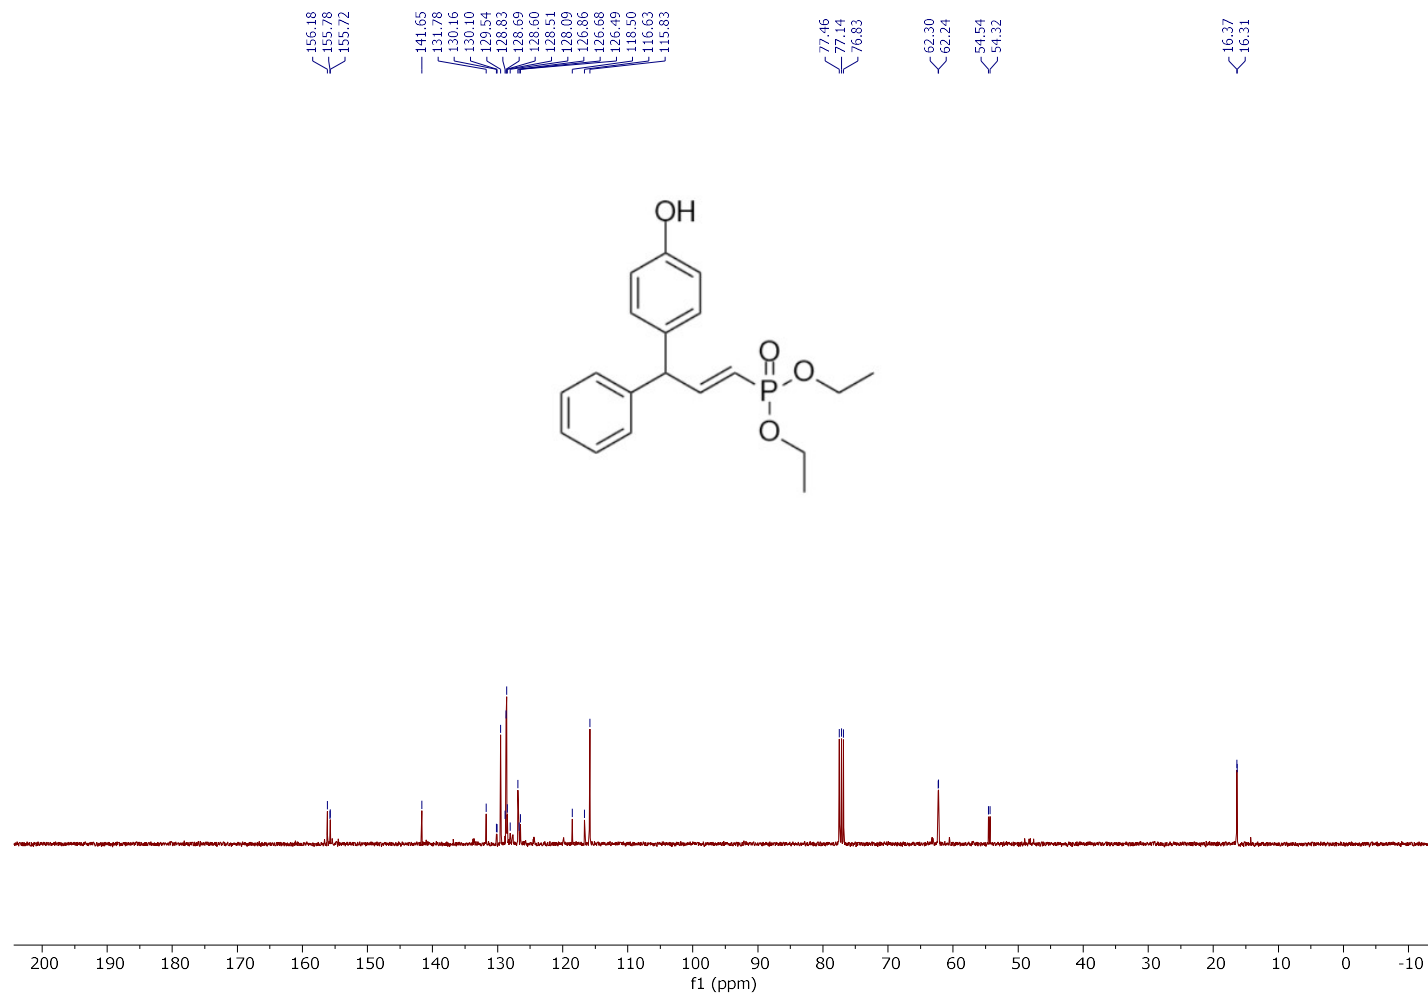

Figure S146:  $^{13}\text{C}\{^1\text{H}\}$  NMR Spectra of products of the reaction of Phenol with 1a in TFA in  $\text{CDCl}_3$

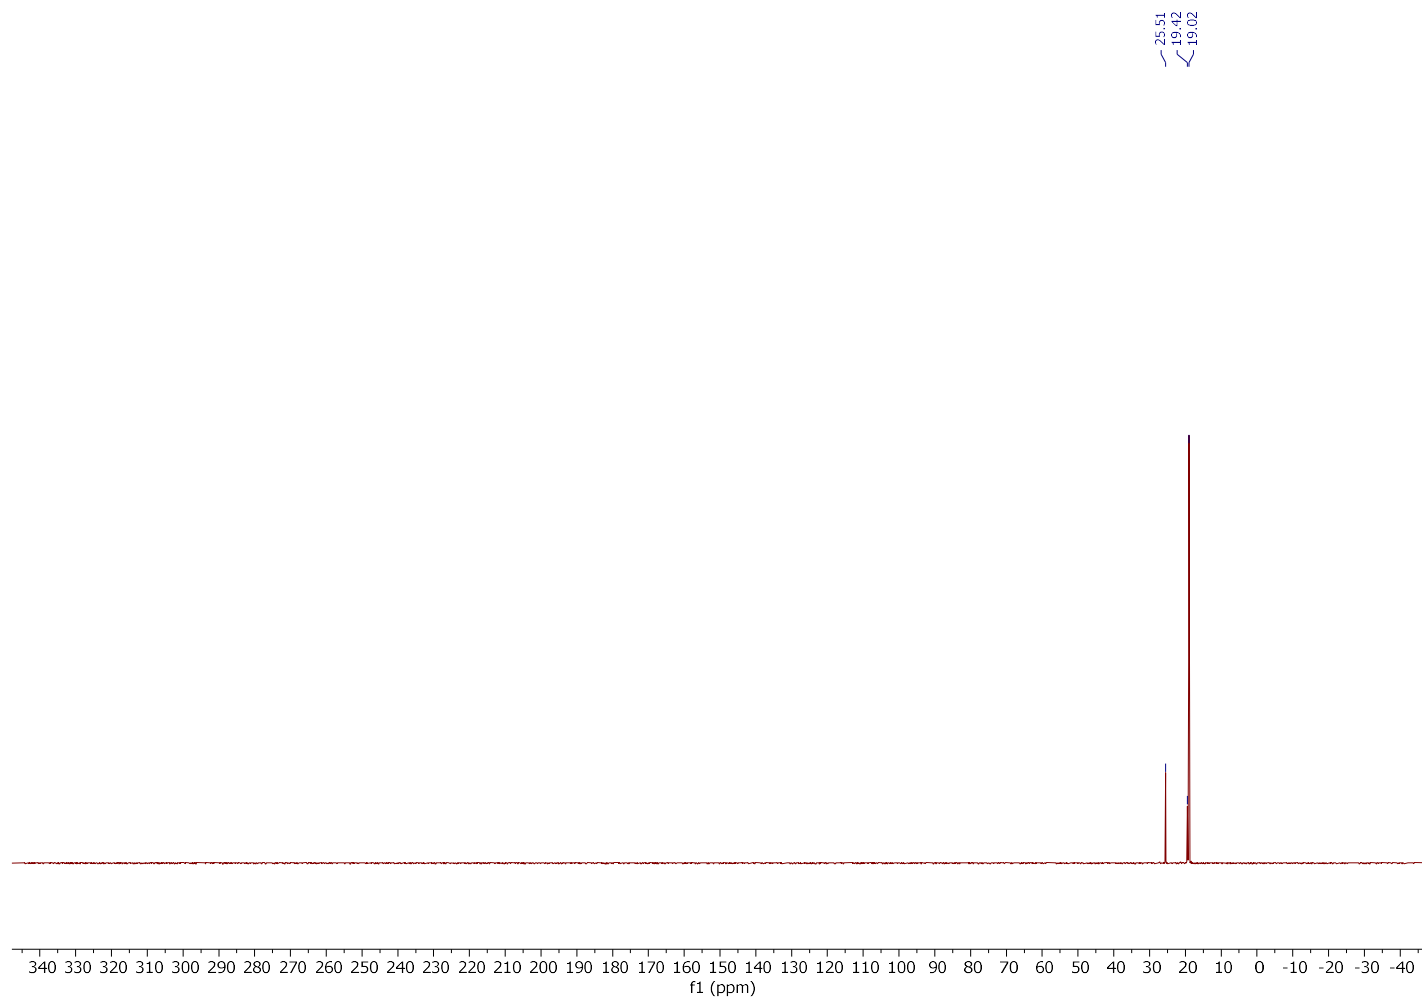

**Figure S147:  $^{31}\text{P}\{^1\text{H}\}$  NMR Spectra of products of the reaction of Phenol with 1a in TFA in  $\text{CDCl}_3$**

## DFT calculations

All calculations were conducted by using a *Gaussian 09* program package, revision D.01.<sup>1</sup> Molecular geometries were optimized at PCM(AcOH)-M062X/6-31+G(d,p) level of theory. Thermochemical properties were obtained by single point calculations with frequency analysis. Free Gibbs energies  $\Delta G$  are calculated as the values at 298 K. Single imaginary frequency was obtained in all transition states, which were supported by the intrinsic reaction coordinate (IRC) calculations using the local quadratic approximation (lqa) algorithm. Each geometry of reaction intermediates was obtained by structural optimization of the IRC geometries.

## Simulated reaction paths for C-C and C-O bond forming reactions

**Table S1.** Molecular geometries and energies for the C-C bond forming reaction

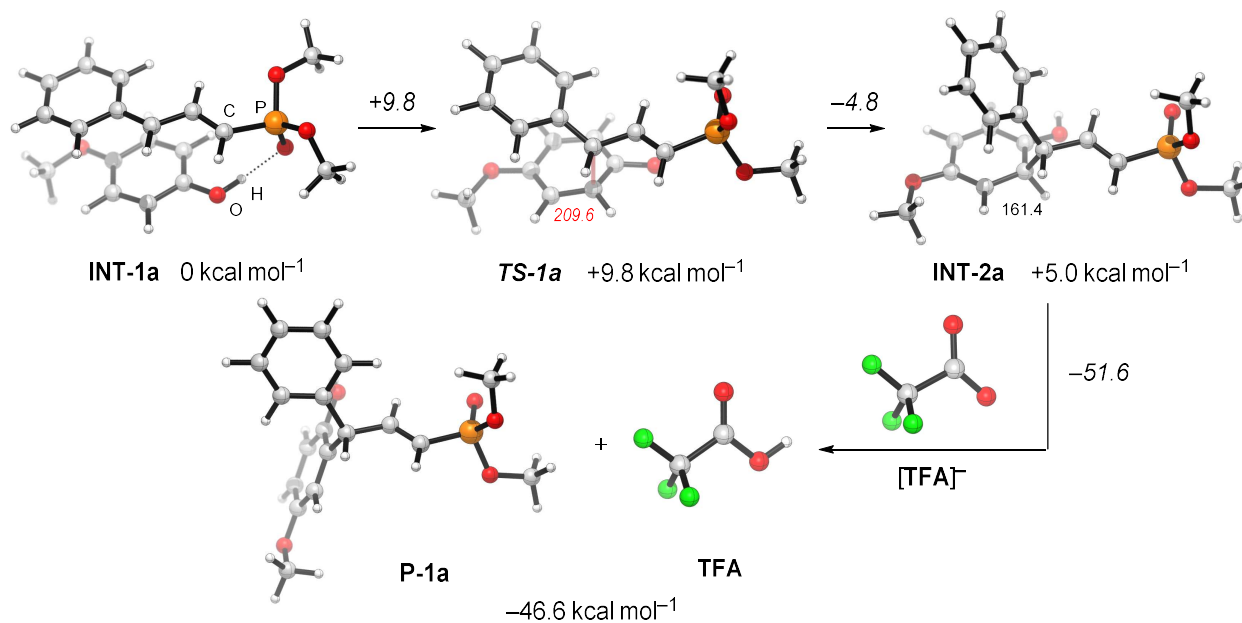

| <b>INT-1a</b> |        |                         |           |           | <b>TS-1a</b> |        |                         |           |           |
|---------------|--------|-------------------------|-----------|-----------|--------------|--------|-------------------------|-----------|-----------|
| Center        | Atomic | Coordinates (Angstroms) |           |           | Center       | Atomic | Coordinates (Angstroms) |           |           |
| Number        | Number | X                       | Y         | Z         | Number       | Number | X                       | Y         | Z         |
| 1             | 6      | 1.578483                | -0.591016 | 1.532869  | 1            | 6      | 2.054926                | -0.686778 | 0.175723  |
| 2             | 1      | 1.171216                | -1.385937 | 2.153983  | 2            | 1      | 1.561284                | -1.329026 | 0.902831  |
| 3             | 6      | 0.805616                | 0.439576  | 1.121097  | 3            | 6      | 1.389148                | 0.233713  | -0.534104 |
| 4             | 1      | 1.234527                | 1.219669  | 0.498387  | 4            | 1      | 1.939254                | 0.837284  | -1.252816 |
| 5             | 6      | -0.594853               | 0.444070  | 1.403657  | 5            | 6      | -0.049207               | 0.453917  | -0.383053 |
| 6             | 1      | -0.958161               | -0.334166 | 2.074341  | 6            | 1      | -0.490102               | -0.069346 | 0.463301  |
| 7             | 6      | -1.536103               | 1.367374  | 0.923019  | 7            | 6      | -0.639394               | 1.760187  | -0.646989 |
| 8             | 6      | -2.896514               | 1.208168  | 1.313052  | 8            | 6      | -1.813896               | 2.113155  | 0.046224  |
| 9             | 6      | -1.200466               | 2.419124  | 0.022460  | 9            | 6      | -0.086960               | 2.678356  | -1.558286 |
| 10            | 6      | -3.865229               | 2.079546  | 0.855127  | 10           | 6      | -2.411915               | 3.348135  | -0.154850 |
| 11            | 1      | -3.158017               | 0.395726  | 1.985261  | 11           | 1      | -2.243309               | 1.409849  | 0.755433  |
| 12            | 6      | -2.178394               | 3.279583  | -0.436290 | 12           | 6      | -0.687260               | 3.918286  | -1.756229 |
| 13            | 1      | -0.174695               | 2.555590  | -0.301148 | 13           | 1      | 0.810595                | 2.431297  | -2.116303 |
| 14            | 6      | -3.507183               | 3.106410  | -0.028340 | 14           | 6      | -1.848590               | 4.252222  | -1.060694 |
| 15            | 1      | -4.896787               | 1.965854  | 1.169460  | 15           | 1      | -3.312268               | 3.610397  | 0.390391  |
| 16            | 1      | -1.922056               | 4.078606  | -1.122344 | 16           | 1      | -0.250323               | 4.621306  | -2.456871 |
| 17            | 1      | -4.271198               | 3.782345  | -0.399784 | 17           | 1      | -2.315807               | 5.218353  | -1.221196 |
| 18            | 6      | -0.503276               | -1.525175 | -0.846982 | 18           | 6      | -0.125595               | -0.663600 | -2.778924 |
| 19            | 6      | -1.824367               | -1.788546 | -0.451654 | 19           | 6      | -0.953861               | -0.946029 | -1.653512 |

|    |    |           |           |           |    |    |           |           |           |
|----|----|-----------|-----------|-----------|----|----|-----------|-----------|-----------|
| 20 | 6  | -0.241586 | -0.459786 | -1.729857 | 20 | 6  | -0.535635 | 0.296490  | -3.720502 |
| 21 | 6  | -2.874189 | -1.012761 | -0.924334 | 21 | 6  | -2.315119 | -0.510926 | -1.659122 |
| 22 | 1  | -2.011030 | -2.626195 | 0.212667  | 22 | 1  | -0.678238 | -1.809186 | -1.055133 |
| 23 | 6  | -1.281438 | 0.328211  | -2.183664 | 23 | 6  | -1.792169 | 0.838750  | -3.600463 |
| 24 | 1  | 0.777234  | -0.267951 | -2.056180 | 24 | 1  | 0.120636  | 0.590613  | -4.533096 |
| 25 | 6  | -2.607902 | 0.068084  | -1.779090 | 25 | 6  | -2.711137 | 0.418084  | -2.588620 |
| 26 | 1  | -3.886474 | -1.245298 | -0.616415 | 26 | 1  | -2.970083 | -0.851088 | -0.866150 |
| 27 | 1  | -1.102378 | 1.151664  | -2.867272 | 27 | 1  | -2.135460 | 1.588322  | -4.307324 |
| 28 | 15 | 3.215493  | -0.834740 | 0.833394  | 28 | 15 | 3.826582  | -0.854796 | -0.061283 |
| 29 | 8  | 4.150635  | -1.505511 | 1.930168  | 29 | 8  | 3.988638  | -2.435011 | -0.150230 |
| 30 | 8  | 3.764349  | 0.648059  | 0.724757  | 30 | 8  | 4.508216  | -0.541440 | 1.356370  |
| 31 | 8  | 3.120583  | -1.609004 | -0.442163 | 31 | 8  | 4.351924  | -0.038074 | -1.184413 |
| 32 | 6  | 4.314952  | -2.940052 | 1.976164  | 32 | 6  | 5.311568  | -2.994173 | -0.291115 |
| 33 | 1  | 3.395738  | -3.410604 | 2.331221  | 33 | 1  | 5.900278  | -2.779934 | 0.602766  |
| 34 | 1  | 4.575731  | -3.316808 | 0.987033  | 34 | 1  | 5.175092  | -4.067525 | -0.402426 |
| 35 | 1  | 5.122740  | -3.123713 | 2.680906  | 35 | 1  | 5.799021  | -2.583979 | -1.177639 |
| 36 | 6  | 5.055293  | 0.877811  | 0.114374  | 36 | 6  | 4.819223  | 0.823623  | 1.689133  |
| 37 | 1  | 5.191807  | 1.956452  | 0.101737  | 37 | 1  | 5.298512  | 0.796276  | 2.665635  |
| 38 | 1  | 5.834366  | 0.406254  | 0.715687  | 38 | 1  | 5.496056  | 1.246081  | 0.945249  |
| 39 | 1  | 5.060882  | 0.482824  | -0.902797 | 39 | 1  | 3.902839  | 1.418408  | 1.744542  |
| 40 | 8  | 0.461846  | -2.325683 | -0.365283 | 40 | 8  | 1.026114  | -1.316494 | -2.847367 |
| 41 | 1  | 1.360907  | -2.088643 | -0.681598 | 41 | 1  | 1.582812  | -1.013264 | -3.581656 |

|                                                           |   |           |           |           |                                                           |   |           |           |           |
|-----------------------------------------------------------|---|-----------|-----------|-----------|-----------------------------------------------------------|---|-----------|-----------|-----------|
| 42                                                        | 8 | -3.546399 | 0.903571  | -2.266277 | 42                                                        | 8 | -3.922752 | 0.998944  | -2.664339 |
| 43                                                        | 6 | -4.914607 | 0.562679  | -2.066895 | 43                                                        | 6 | -4.876188 | 0.646418  | -1.669331 |
| 44                                                        | 1 | -5.165868 | 0.551951  | -1.001934 | 44                                                        | 1 | -4.506653 | 0.915525  | -0.673496 |
| 45                                                        | 1 | -5.489818 | 1.337329  | -2.570477 | 45                                                        | 1 | -5.772814 | 1.218428  | -1.897292 |
| 46                                                        | 1 | -5.133050 | -0.413794 | -2.510121 | 46                                                        | 1 | -5.097925 | -0.424725 | -1.709651 |
| E(RM062X) = -1416.02667499                                |   |           |           |           | E(RM062X) = -1416.01044361                                |   |           |           |           |
| Zero-point correction= 0.376162 (Hartree/Particle)        |   |           |           |           | Zero-point correction= 0.376299 (Hartree/Particle)        |   |           |           |           |
| Sum of electronic and thermal Energies= -1415.625602      |   |           |           |           | Sum of electronic and thermal Energies= -1415.609779      |   |           |           |           |
| Sum of electronic and thermal Enthalpies= -1415.624658    |   |           |           |           | Sum of electronic and thermal Enthalpies= -1415.608835    |   |           |           |           |
| Sum of electronic and thermal Free Energies= -1415.705733 |   |           |           |           | Sum of electronic and thermal Free Energies= -1415.690094 |   |           |           |           |

| INT-2a |        |                         |           |           | P-1    |        |                         |           |           |
|--------|--------|-------------------------|-----------|-----------|--------|--------|-------------------------|-----------|-----------|
| Center | Atomic | Coordinates (Angstroms) |           |           | Center | Atomic | Coordinates (Angstroms) |           |           |
| Number | Number | X                       | Y         | Z         | Number | Number | X                       | Y         | Z         |
| 1      | 6      | 1.449793                | -1.117987 | 1.206656  | 1      | 6      | 0.930680                | -0.760813 | 1.324609  |
| 2      | 1      | 0.885240                | -1.661561 | 1.961899  | 2      | 1      | 0.251367                | -1.036817 | 2.129112  |
| 3      | 6      | 0.864132                | -0.299920 | 0.329774  | 3      | 6      | 0.571810                | 0.086123  | 0.355698  |
| 4      | 1      | 1.488067                | 0.218260  | -0.394880 | 4      | 1      | 1.282635                | 0.340749  | -0.430108 |
| 5      | 6      | -0.620442               | -0.052875 | 0.308920  | 5      | 6      | -0.798493               | 0.707428  | 0.251867  |
| 6      | 1      | -1.046040               | -0.481399 | 1.220911  | 6      | 1      | -1.381230               | 0.366885  | 1.117317  |
| 7      | 6      | -0.988036               | 1.417905  | 0.246424  | 7      | 6      | -0.763183               | 2.235304  | 0.305528  |
| 8      | 6      | -1.985009               | 1.910713  | 1.093944  | 8      | 6      | 0.322644                | 2.918855  | 0.857279  |

|    |    |           |           |           |    |    |           |           |           |
|----|----|-----------|-----------|-----------|----|----|-----------|-----------|-----------|
| 9  | 6  | -0.365933 | 2.296252  | -0.647650 | 9  | 6  | -1.862008 | 2.973506  | -0.147271 |
| 10 | 6  | -2.362293 | 3.251303  | 1.044156  | 10 | 6  | 0.314980  | 4.311598  | 0.950316  |
| 11 | 1  | -2.467884 | 1.240540  | 1.801314  | 11 | 1  | 1.185477  | 2.365537  | 1.217095  |
| 12 | 6  | -0.742129 | 3.637409  | -0.699847 | 12 | 6  | -1.874092 | 4.363098  | -0.051534 |
| 13 | 1  | 0.425381  | 1.948186  | -1.307156 | 13 | 1  | -2.712252 | 2.455751  | -0.583868 |
| 14 | 6  | -1.742211 | 4.117487  | 0.144522  | 14 | 6  | -0.782868 | 5.039031  | 0.496410  |
| 15 | 1  | -3.136139 | 3.618253  | 1.710480  | 15 | 1  | 1.170891  | 4.825522  | 1.377107  |
| 16 | 1  | -0.248062 | 4.306962  | -1.396287 | 16 | 1  | -2.735525 | 4.919156  | -0.408779 |
| 17 | 1  | -2.032038 | 5.162402  | 0.105890  | 17 | 1  | -0.789342 | 6.122132  | 0.567206  |
| 18 | 6  | -0.889031 | -0.445922 | -2.188276 | 18 | 6  | -1.016330 | 0.467792  | -2.268796 |
| 19 | 6  | -1.351709 | -0.894313 | -0.858257 | 19 | 6  | -1.496868 | 0.173441  | -0.989918 |
| 20 | 6  | -1.735144 | 0.239409  | -3.072137 | 20 | 6  | -1.669425 | -0.037811 | -3.394374 |
| 21 | 6  | -2.816685 | -0.797688 | -0.636412 | 21 | 6  | -2.631696 | -0.635097 | -0.858169 |
| 22 | 1  | -1.006475 | -1.926509 | -0.713040 | 22 | 6  | -2.795715 | -0.837083 | -3.255827 |
| 23 | 6  | -3.054410 | 0.382833  | -2.727490 | 23 | 1  | -1.290152 | 0.195406  | -4.385566 |
| 24 | 1  | -1.357428 | 0.628263  | -4.011612 | 24 | 6  | -3.284376 | -1.141628 | -1.982988 |
| 25 | 6  | -3.620161 | -0.153880 | -1.517175 | 25 | 1  | -2.992081 | -0.855557 | 0.140692  |
| 26 | 1  | -3.193249 | -1.202415 | 0.296211  | 26 | 1  | -3.307131 | -1.234581 | -4.126076 |
| 27 | 1  | -3.731981 | 0.908686  | -3.394886 | 27 | 15 | 2.573911  | -1.448393 | 1.353083  |
| 28 | 15 | 3.228664  | -1.308672 | 1.178379  | 28 | 8  | 2.299807  | -3.015466 | 1.512867  |
| 29 | 8  | 3.392777  | -2.892407 | 1.269406  | 29 | 8  | 3.190577  | -1.112548 | 2.806364  |
| 30 |    | 3.767851  | -0.859535 | 2.624810  | 30 | 8  | 3.453304  | -1.032382 | 0.228969  |

|                                                           |   |           |           |           |                                                           |   |           |           |           |
|-----------------------------------------------------------|---|-----------|-----------|-----------|-----------------------------------------------------------|---|-----------|-----------|-----------|
| 31                                                        | 8 | 3.895610  | -0.614166 | 0.046914  | 31                                                        | 6 | 3.425438  | -3.903902 | 1.629189  |
| 32                                                        | 6 | 4.719170  | -3.450587 | 1.349500  | 32                                                        | 1 | 3.965436  | -3.702540 | 2.556934  |
| 33                                                        | 1 | 5.193008  | -3.147848 | 2.285290  | 33                                                        | 1 | 3.017197  | -4.912623 | 1.646485  |
| 34                                                        | 1 | 4.595352  | -4.531232 | 1.325040  | 34                                                        | 1 | 4.089815  | -3.785438 | 0.770543  |
| 35                                                        | 1 | 5.316906  | -3.123295 | 0.496350  | 35                                                        | 6 | 3.785720  | 0.177804  | 3.002791  |
| 36                                                        | 6 | 4.050800  | 0.532076  | 2.847919  | 36                                                        | 1 | 4.157699  | 0.193967  | 4.025887  |
| 37                                                        | 1 | 4.417856  | 0.608937  | 3.869626  | 37                                                        | 1 | 4.607238  | 0.326608  | 2.299548  |
| 38                                                        | 1 | 4.810047  | 0.878349  | 2.144953  | 38                                                        | 1 | 3.037221  | 0.966055  | 2.873228  |
| 39                                                        | 1 | 3.139626  | 1.127561  | 2.737857  | 39                                                        | 8 | 0.096015  | 1.258439  | -2.364025 |
| 40                                                        | 8 | 0.359237  | -0.704933 | -2.456321 | 40                                                        | 1 | 0.340485  | 1.381771  | -3.289672 |
| 41                                                        | 1 | 0.646711  | -0.370366 | -3.323833 | 41                                                        | 8 | -4.395524 | -1.932356 | -1.937587 |
| 42                                                        | 8 | -4.943273 | 0.058735  | -1.402331 | 42                                                        | 6 | -4.905336 | -2.273627 | -0.660717 |
| 43                                                        | 6 | -5.567863 | -0.412188 | -0.212111 | 43                                                        | 1 | -5.214380 | -1.379687 | -0.107239 |
| 44                                                        | 1 | -5.119727 | 0.063751  | 0.666476  | 44                                                        | 1 | -5.772956 | -2.906442 | -0.841398 |
| 45                                                        | 1 | -6.615402 | -0.131874 | -0.292853 | 45                                                        | 1 | -4.163383 | -2.828597 | -0.075664 |
| 46                                                        | 1 | -5.477953 | -1.500646 | -0.137561 |                                                           |   |           |           |           |
| E(RM062X) = -1416.01901457                                |   |           |           |           | E(RM062X) = -1415.64677720                                |   |           |           |           |
| Zero-point correction= 0.377970 (Hartree/Particle)        |   |           |           |           | Zero-point correction= 0.364460 (Hartree/Particle)        |   |           |           |           |
| Sum of electronic and thermal Energies= -1415.616513      |   |           |           |           | Sum of electronic and thermal Energies= -1415.257440      |   |           |           |           |
| Sum of electronic and thermal Enthalpies= -1415.615569    |   |           |           |           | Sum of electronic and thermal Enthalpies= -1415.256496    |   |           |           |           |
| Sum of electronic and thermal Free Energies= -1415.697763 |   |           |           |           | Sum of electronic and thermal Free Energies= -1415.340413 |   |           |           |           |

| [TFA] <sup>-</sup>                                       |        |                         |           |           | TFA                                                      |        |                         |           |           |
|----------------------------------------------------------|--------|-------------------------|-----------|-----------|----------------------------------------------------------|--------|-------------------------|-----------|-----------|
| Center                                                   | Atomic | Coordinates (Angstroms) |           |           | Center                                                   | Atomic | Coordinates (Angstroms) |           |           |
| Number                                                   | Number | X                       | Y         | Z         | Number                                                   | Number | X                       | Y         | Z         |
| 1                                                        | 6      | -1.079837               | -2.085665 | -0.948991 | 1                                                        | 6      | -1.147908               | -2.058617 | -0.919631 |
| 2                                                        | 6      | -1.552364               | -0.592583 | -0.947476 | 2                                                        | 6      | -1.558242               | -0.570332 | -0.947569 |
| 3                                                        | 8      | -1.867190               | -2.896615 | -0.434134 | 3                                                        | 8      | -1.845186               | -2.916258 | -0.456505 |
| 4                                                        | 8      | 0.037422                | -2.236018 | -1.475865 | 4                                                        | 8      | 0.046456                | -2.201262 | -1.470738 |
| 5                                                        | 9      | -2.761992               | -0.399334 | -0.394220 | 5                                                        | 1      | 0.306675                | -3.138149 | -1.456096 |
| 6                                                        | 9      | -0.690727               | 0.198552  | -0.269875 | 6                                                        | 9      | -2.752487               | -0.406718 | -0.390864 |
| 7                                                        | 9      | -1.621293               | -0.093005 | -2.201371 | 7                                                        | 9      | -0.669680               | 0.172736  | -0.279299 |
|                                                          |        |                         |           |           | 8                                                        | 9      | -1.608933               | -0.124217 | -2.207327 |
| E(RM062X) = -526.191000752                               |        |                         |           |           | E(RM062X) = -526.643381074                               |        |                         |           |           |
| Zero-point correction= 0.026627 (Hartree/Particle)       |        |                         |           |           | Zero-point correction= 0.039659 (Hartree/Particle)       |        |                         |           |           |
| Sum of electronic and thermal Energies= -526.158437      |        |                         |           |           | Sum of electronic and thermal Energies= -526.597519      |        |                         |           |           |
| Sum of electronic and thermal Enthalpies= -526.157493    |        |                         |           |           | Sum of electronic and thermal Enthalpies= -526.596575    |        |                         |           |           |
| Sum of electronic and thermal Free Energies= -526.195424 |        |                         |           |           | Sum of electronic and thermal Free Energies= -526.635075 |        |                         |           |           |

**Table S2.** Molecular geometries and energies for the C-O bond forming reaction

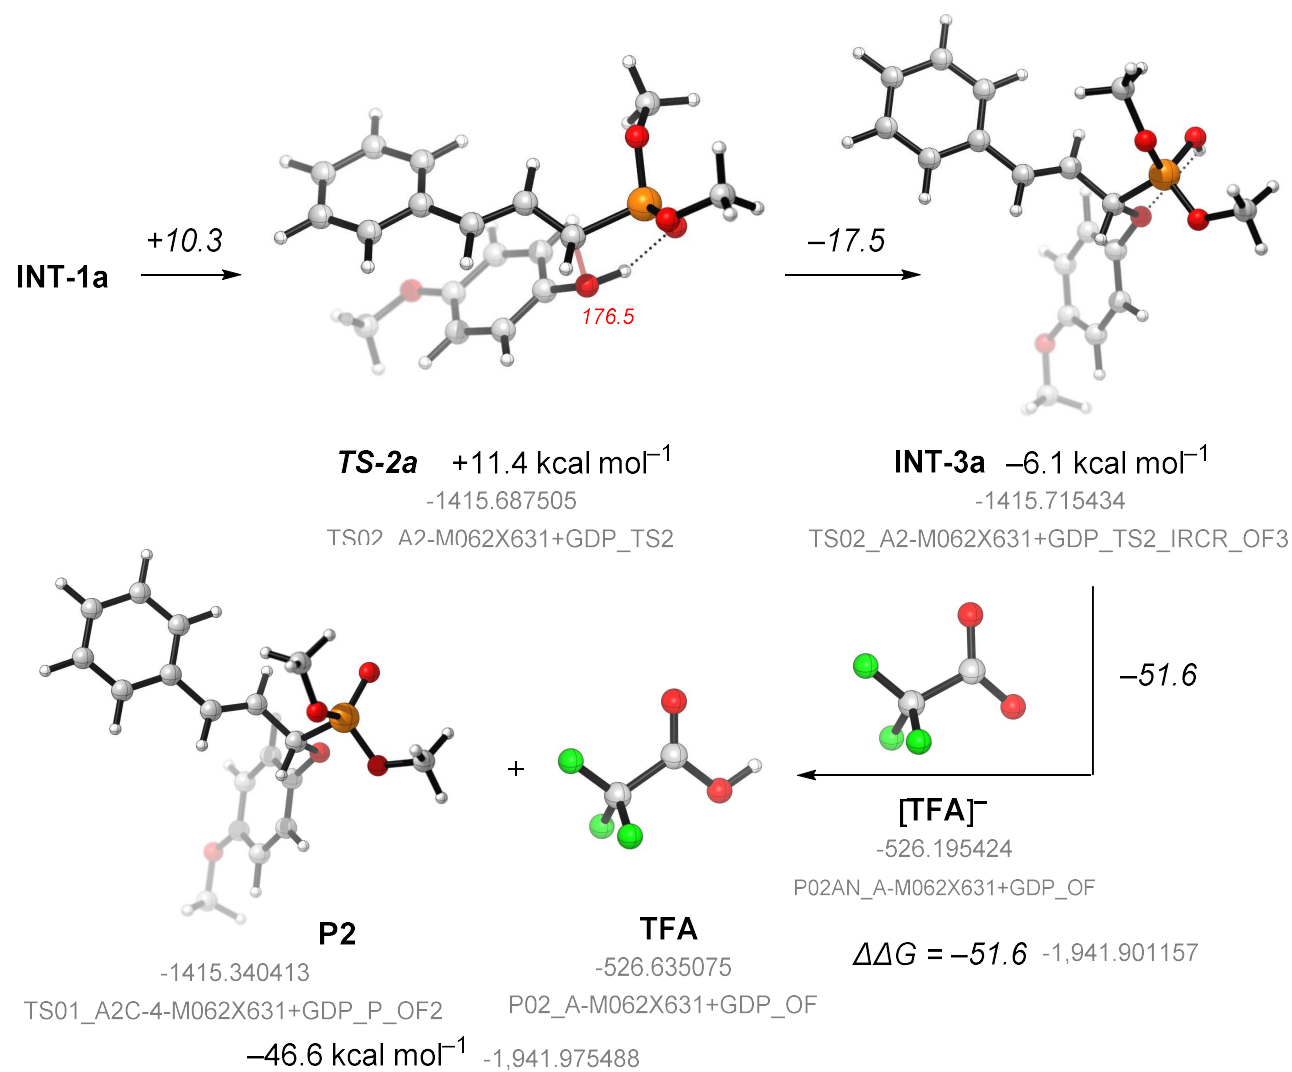

*TS-2a**INT-3a*

| Center | Atomic | Coordinates (Angstroms) |           |           | Center | Atomic | Coordinates (Angstroms) |           |           |
|--------|--------|-------------------------|-----------|-----------|--------|--------|-------------------------|-----------|-----------|
| Number | Number | X                       | Y         | Z         | Number | Number | X                       | Y         | Z         |
| 1      | 6      | 1.775525                | -0.573795 | 1.020557  | 1      | 6      | 0.811020                | -0.488674 | 0.066013  |
| 2      | 1      | 1.670002                | -1.160506 | 1.931216  | 2      | 1      | 0.419656                | -1.030096 | 0.937971  |
| 3      | 6      | 1.052009                | 0.663521  | 0.944455  | 3      | 6      | 0.380551                | 0.944248  | 0.067534  |
| 4      | 1      | 1.331006                | 1.389776  | 0.186639  | 4      | 1      | 0.634071                | 1.519752  | -0.821905 |
| 5      | 6      | -0.097599               | 0.792933  | 1.658006  | 5      | 6      | -0.274153               | 1.485266  | 1.103783  |
| 6      | 1      | -0.302088               | 0.045707  | 2.425638  | 6      | 1      | -0.543520               | 0.838698  | 1.939655  |
| 7      | 6      | -1.133290               | 1.796778  | 1.477184  | 7      | 6      | -0.684002               | 2.891074  | 1.231437  |
| 8      | 6      | -2.232564               | 1.784682  | 2.352271  | 8      | 6      | -1.608777               | 3.233979  | 2.227035  |
| 9      | 6      | -1.111957               | 2.720844  | 0.417173  | 9      | 6      | -0.176396               | 3.902233  | 0.400581  |
| 10     | 6      | -3.278822               | 2.685456  | 2.185729  | 10     | 6      | -2.037705               | 4.550791  | 2.375906  |
| 11     | 1      | -2.259667               | 1.062038  | 3.163465  | 11     | 1      | -1.998163               | 2.459307  | 2.882007  |
| 12     | 6      | -2.157989               | 3.618867  | 0.252493  | 12     | 6      | -0.602999               | 5.216987  | 0.550981  |
| 13     | 1      | -0.286699               | 2.729660  | -0.287767 | 13     | 1      | 0.564347                | 3.667628  | -0.358423 |
| 14     | 6      | -3.241817               | 3.602648  | 1.135083  | 14     | 6      | -1.537172               | 5.544726  | 1.536562  |
| 15     | 1      | -4.121604               | 2.670769  | 2.868612  | 15     | 1      | -2.758965               | 4.800057  | 3.147223  |
| 16     | 1      | -2.137364               | 4.327408  | -0.568620 | 16     | 1      | -0.201621               | 5.990475  | -0.095689 |
| 17     | 1      | -4.059168               | 4.303438  | 0.998868  | 17     | 1      | -1.866236               | 6.572294  | 1.652473  |
| 18     | 6      | -0.296088               | -1.348155 | -0.486202 | 18     | 6      | -0.818657               | -1.529228 | -1.300027 |

|    |    |           |           |           |    |    |           |           |           |
|----|----|-----------|-----------|-----------|----|----|-----------|-----------|-----------|
| 19 | 6  | -1.371516 | -1.726479 | 0.300256  | 19 | 6  | -1.283555 | -2.700171 | -0.722361 |
| 20 | 6  | -0.444589 | -0.480585 | -1.567872 | 20 | 6  | -1.663427 | -0.711141 | -2.047337 |
| 21 | 6  | -2.643423 | -1.236854 | 0.004040  | 21 | 6  | -2.618632 | -3.074570 | -0.887963 |
| 22 | 1  | -1.214017 | -2.389508 | 1.145126  | 22 | 1  | -0.604803 | -3.326965 | -0.151600 |
| 23 | 6  | -1.706409 | 0.000217  | -1.868305 | 23 | 6  | -2.989575 | -1.080255 | -2.217532 |
| 24 | 1  | 0.420149  | -0.176214 | -2.151824 | 24 | 1  | -1.277445 | 0.199865  | -2.492924 |
| 25 | 6  | -2.808945 | -0.357722 | -1.071924 | 25 | 6  | -3.473812 | -2.261138 | -1.637558 |
| 26 | 1  | -3.480259 | -1.531790 | 0.624177  | 26 | 1  | -2.969206 | -3.994166 | -0.436408 |
| 27 | 1  | -1.863888 | 0.678855  | -2.699369 | 27 | 1  | -3.671029 | -0.466638 | -2.796763 |
| 28 | 15 | 3.430821  | -0.675805 | 0.230809  | 28 | 15 | 2.626945  | -0.618666 | 0.115169  |
| 29 | 8  | 4.305109  | -1.266818 | 1.399389  | 29 | 8  | 2.965088  | -2.058073 | 0.598627  |
| 30 | 8  | 3.978398  | 0.793922  | 0.019520  | 30 | 8  | 3.340079  | 0.371901  | 1.080763  |
| 31 | 8  | 3.278913  | -1.466504 | -1.032971 | 31 | 8  | 3.179202  | -0.299011 | -1.326912 |
| 32 | 6  | 5.744467  | -1.376387 | 1.257861  | 32 | 6  | 4.338559  | -2.531123 | 0.742690  |
| 33 | 1  | 6.095110  | -1.840161 | 2.176001  | 33 | 1  | 4.250447  | -3.566780 | 1.057466  |
| 34 | 1  | 5.983969  | -2.006429 | 0.400099  | 34 | 1  | 4.846658  | -2.462261 | -0.219095 |
| 35 | 1  | 6.174393  | -0.380525 | 1.144828  | 35 | 1  | 4.841092  | -1.934489 | 1.502942  |
| 36 | 6  | 4.033049  | 1.399991  | -1.295022 | 36 | 6  | 3.542440  | 1.794718  | 0.831716  |
| 37 | 1  | 4.190415  | 2.461874  | -1.121975 | 37 | 1  | 4.423604  | 2.063929  | 1.407739  |
| 38 | 1  | 4.865260  | 0.973731  | -1.854324 | 38 | 1  | 3.710819  | 1.963547  | -0.231919 |
| 39 | 1  | 3.097924  | 1.234568  | -1.831767 | 39 | 1  | 2.663969  | 2.332186  | 1.186555  |
| 40 | 8  | 0.975168  | -1.724943 | -0.051608 | 40 | 8  | 0.525233  | -1.174653 | -1.150867 |

|                                                           |   |           |           |           |                                                           |   |           |           |           |
|-----------------------------------------------------------|---|-----------|-----------|-----------|-----------------------------------------------------------|---|-----------|-----------|-----------|
| 41                                                        | 1 | 1.672569  | -1.839504 | -0.773452 | 41                                                        | 1 | 2.626004  | -0.640829 | -2.054460 |
| 42                                                        | 8 | -3.985781 | 0.200281  | -1.421741 | 42                                                        | 8 | -4.783978 | -2.533151 | -1.860230 |
| 43                                                        | 6 | -5.115104 | -0.048719 | -0.593822 | 43                                                        | 6 | -5.320804 | -3.720533 | -1.297025 |
| 44                                                        | 1 | -4.925540 | 0.294724  | 0.428829  | 44                                                        | 1 | -5.247269 | -3.703727 | -0.204474 |
| 45                                                        | 1 | -5.933532 | 0.522323  | -1.027512 | 45                                                        | 1 | -6.368415 | -3.744449 | -1.591494 |
| 46                                                        | 1 | -5.370417 | -1.112980 | -0.591229 | 46                                                        | 1 | -4.809238 | -4.606039 | -1.688770 |
| E(RM062X) = -1416.00784106                                |   |           |           |           | E(RM062X) = -1416.03455818                                |   |           |           |           |
| Zero-point correction= 0.375726 (Hartree/Particle)        |   |           |           |           | Zero-point correction= 0.376991 (Hartree/Particle)        |   |           |           |           |
| Sum of electronic and thermal Energies= -1415.608038      |   |           |           |           | Sum of electronic and thermal Energies= -1415.632861      |   |           |           |           |
| Sum of electronic and thermal Enthalpies= -1415.607094    |   |           |           |           | Sum of electronic and thermal Enthalpies= -1415.631916    |   |           |           |           |
| Sum of electronic and thermal Free Energies= -1415.687505 |   |           |           |           | Sum of electronic and thermal Free Energies= -1415.715434 |   |           |           |           |

## P-2

| Center | Atomic | Coordinates (Angstroms) |           |           |
|--------|--------|-------------------------|-----------|-----------|
| Number | Number | X                       | Y         | Z         |
| 1      | 6      | 0.914808                | -0.488625 | -0.063847 |
| 2      | 1      | 0.564086                | -1.021701 | 0.831817  |
| 3      | 6      | 0.414211                | 0.924180  | -0.064954 |
| 4      | 1      | 0.650273                | 1.506349  | -0.954772 |
| 5      | 6      | -0.254197               | 1.451421  | 0.967872  |
| 6      | 1      | -0.494958               | 0.804745  | 1.812495  |
| 7      | 6      | -0.712772               | 2.846091  | 1.084550  |

|    |    |           |           |           |
|----|----|-----------|-----------|-----------|
| 8  | 6  | -1.674351 | 3.165252  | 2.052984  |
| 9  | 6  | -0.213922 | 3.872852  | 0.268042  |
| 10 | 6  | -2.146701 | 4.469010  | 2.188216  |
| 11 | 1  | -2.058105 | 2.380008  | 2.699084  |
| 12 | 6  | -0.684531 | 5.174997  | 0.403147  |
| 13 | 1  | 0.557231  | 3.657272  | -0.465718 |
| 14 | 6  | -1.654729 | 5.477737  | 1.361194  |
| 15 | 1  | -2.895753 | 4.696687  | 2.939977  |
| 16 | 1  | -0.286992 | 5.958835  | -0.233853 |
| 17 | 1  | -2.017204 | 6.495327  | 1.466463  |
| 18 | 6  | -0.783989 | -1.522013 | -1.327592 |
| 19 | 6  | -1.289639 | -2.593546 | -0.604252 |
| 20 | 6  | -1.616829 | -0.783451 | -2.168267 |
| 21 | 6  | -2.638531 | -2.941606 | -0.712101 |
| 22 | 1  | -0.627186 | -3.167482 | 0.037251  |
| 23 | 6  | -2.956696 | -1.126258 | -2.284286 |
| 24 | 1  | -1.203727 | 0.049693  | -2.727837 |
| 25 | 6  | -3.474065 | -2.204616 | -1.555235 |
| 26 | 1  | -3.013974 | -3.784195 | -0.144478 |
| 27 | 1  | -3.623000 | -0.569197 | -2.934575 |
| 28 | 15 | 2.744017  | -0.490584 | -0.002751 |
| 29 | 8  | 3.052524  | -2.038170 | 0.231486  |

|    |   |           |           |           |
|----|---|-----------|-----------|-----------|
| 30 | 8 | 3.092284  | 0.151368  | 1.428638  |
| 31 | 8 | 3.432455  | 0.170509  | -1.140313 |
| 32 | 6 | 4.425306  | -2.471541 | 0.254516  |
| 33 | 1 | 4.401063  | -3.551290 | 0.386939  |
| 34 | 1 | 4.913773  | -2.219694 | -0.688604 |
| 35 | 1 | 4.950628  | -2.004929 | 1.091279  |
| 36 | 6 | 3.489053  | 1.531154  | 1.524045  |
| 37 | 1 | 3.894679  | 1.661578  | 2.526010  |
| 38 | 1 | 4.248763  | 1.758007  | 0.774691  |
| 39 | 1 | 2.620196  | 2.179951  | 1.386625  |
| 40 | 8 | 0.562423  | -1.200624 | -1.247528 |
| 41 | 8 | -4.799110 | -2.460618 | -1.734368 |
| 42 | 6 | -5.362143 | -3.547970 | -1.020116 |
| 43 | 1 | -5.276159 | -3.395130 | 0.061309  |
| 44 | 1 | -6.413782 | -3.580023 | -1.300457 |
| 45 | 1 | -4.880502 | -4.492094 | -1.297174 |

---

E(RM062X) = -1415.62892204

Zero-point correction= 0.364475 (Hartree/Particle)

Sum of electronic and thermal Energies= -1415.239813

Sum of electronic and thermal Enthalpies= -1415.238869

Sum of electronic and thermal Free Energies= -1415.323685

---

### Energetic impact of H-bonding or non-H-bonding transition states

As shown in Table S3, the H-bonding between phenolic hydroxy group and phosphoryl group slightly destabilized the transition state for the C-C bond formation step ( $\Delta\Delta G = +0.3 \text{ kcal mol}^{-1}$  by the H-bonding). In contrast, this H-bonding highly stabilized the transition state for the C-O bond formation step ( $\Delta\Delta G = +1.1 \text{ kcal mol}^{-1}$  by lack of the H-bonding).

**Table S3.** Molecular geometries and energies

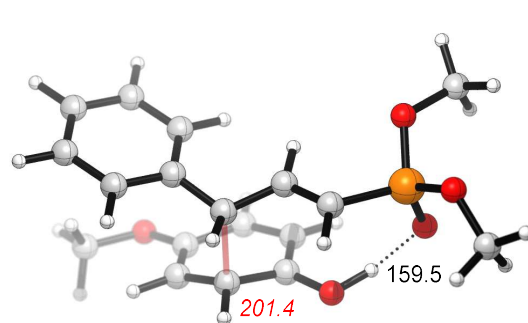

***TS-1a'*** +10.1 kcal mol<sup>-1</sup>  
H-bond-assisted version of ***TS-1a***  
( $\Delta\Delta G = +0.3 \text{ kcal mol}^{-1}$ )

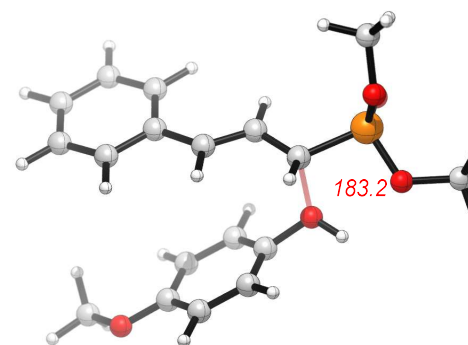

***TS-2a'*** +12.5 kcal mol<sup>-1</sup>  
non H-bonding version of ***TS-2a***  
( $\Delta\Delta G = +1.1 \text{ kcal mol}^{-1}$ )

| <i>TS-1a'</i> |        |                         |           |          | <i>TS-2a'</i> |        |                         |           |          |
|---------------|--------|-------------------------|-----------|----------|---------------|--------|-------------------------|-----------|----------|
| Center        | Atomic | Coordinates (Angstroms) |           |          | Center        | Atomic | Coordinates (Angstroms) |           |          |
| Number        | Number | X                       | Y         | Z        | Number        | Number | X                       | Y         | Z        |
| 1             | 6      | 2.019763                | -0.265267 | 0.602942 | 1             | 6      | 1.555898                | -0.361830 | 0.514528 |
| 2             | 1      | 1.691810                | -1.071857 | 1.255270 | 2             | 1      | 1.209191                | -0.861228 | 1.419651 |

|    |   |           |           |           |    |   |           |           |           |
|----|---|-----------|-----------|-----------|----|---|-----------|-----------|-----------|
| 3  | 6 | 1.151265  | 0.589061  | 0.042496  | 3  | 6 | 0.936995  | 0.871022  | 0.169197  |
| 4  | 1 | 1.529054  | 1.361117  | -0.624865 | 4  | 1 | 1.399577  | 1.481658  | -0.600500 |
| 5  | 6 | -0.306896 | 0.455341  | 0.163596  | 5  | 6 | -0.294132 | 1.151668  | 0.689133  |
| 6  | 1 | -0.616543 | -0.144868 | 1.017895  | 6  | 1 | -0.695497 | 0.460749  | 1.432189  |
| 7  | 6 | -1.134261 | 1.657029  | -0.046918 | 7  | 6 | -1.169829 | 2.250876  | 0.336256  |
| 8  | 6 | -2.340555 | 1.773439  | 0.661194  | 8  | 6 | -2.477180 | 2.240705  | 0.853566  |
| 9  | 6 | -0.778267 | 2.661594  | -0.959376 | 9  | 6 | -0.777184 | 3.289704  | -0.528363 |
| 10 | 6 | -3.165367 | 2.876136  | 0.475987  | 10 | 6 | -3.378230 | 3.243109  | 0.510594  |
| 11 | 1 | -2.624191 | 0.992246  | 1.361662  | 11 | 1 | -2.781094 | 1.436526  | 1.518790  |
| 12 | 6 | -1.614534 | 3.758863  | -1.154869 | 12 | 6 | -1.675863 | 4.293142  | -0.859672 |
| 13 | 1 | 0.144419  | 2.597403  | -1.527123 | 13 | 1 | 0.229971  | 3.318205  | -0.931335 |
| 14 | 6 | -2.804820 | 3.870103  | -0.437935 | 14 | 6 | -2.976667 | 4.269321  | -0.344140 |
| 15 | 1 | -4.088226 | 2.962297  | 1.039874  | 15 | 1 | -4.386612 | 3.227199  | 0.909886  |
| 16 | 1 | -1.332560 | 4.528797  | -1.865139 | 16 | 1 | -1.368956 | 5.097045  | -1.519932 |
| 17 | 1 | -3.450331 | 4.729371  | -0.587777 | 17 | 1 | -3.675134 | 5.056460  | -0.609278 |
| 18 | 6 | 0.283600  | -1.071252 | -1.879052 | 18 | 6 | -0.521253 | -1.626464 | -0.644231 |
| 19 | 6 | -0.955763 | -0.916428 | -1.160192 | 19 | 6 | -1.202337 | -2.329880 | 0.349656  |
| 20 | 6 | 0.532639  | -0.248878 | -3.010134 | 20 | 6 | -1.181979 | -0.819271 | -1.555911 |
| 21 | 6 | -2.072375 | -0.316960 | -1.847921 | 21 | 6 | -2.581550 | -2.230251 | 0.405143  |
| 22 | 1 | -1.171712 | -1.707983 | -0.448307 | 22 | 1 | -0.662573 | -2.940961 | 1.067759  |
| 23 | 6 | -0.512999 | 0.454486  | -3.539840 | 23 | 6 | -2.570633 | -0.710422 | -1.493757 |
| 24 | 1 | 1.513056  | -0.246406 | -3.474848 | 24 | 1 | -0.613473 | -0.272957 | -2.301335 |

|    |    |           |           |           |    |    |           |           |           |
|----|----|-----------|-----------|-----------|----|----|-----------|-----------|-----------|
| 25 | 6  | -1.842101 | 0.396642  | -2.988273 | 25 | 6  | -3.271315 | -1.409245 | -0.505010 |
| 26 | 1  | -3.048229 | -0.358399 | -1.380810 | 26 | 1  | -3.150164 | -2.767275 | 1.156045  |
| 27 | 1  | -0.371119 | 1.064251  | -4.427583 | 27 | 1  | -3.081087 | -0.073526 | -2.204851 |
| 28 | 15 | 3.664753  | -0.373865 | -0.087997 | 28 | 15 | 3.328393  | -0.591348 | 0.136379  |
| 29 | 8  | 4.701958  | -0.916266 | 0.983832  | 29 | 8  | 3.351663  | -2.185622 | 0.095002  |
| 30 | 8  | 4.090529  | 1.135764  | -0.301453 | 30 | 8  | 4.069769  | -0.251222 | 1.501205  |
| 31 | 8  | 3.614875  | -1.216103 | -1.338998 | 31 | 8  | 3.793056  | 0.150508  | -1.053757 |
| 32 | 6  | 4.992674  | -2.325835 | 1.102916  | 32 | 6  | 4.598728  | -2.874502 | -0.170996 |
| 33 | 1  | 4.181714  | -2.825612 | 1.635838  | 33 | 1  | 5.305557  | -2.667258 | 0.633660  |
| 34 | 1  | 5.128975  | -2.764029 | 0.113836  | 34 | 1  | 4.355792  | -3.933754 | -0.196470 |
| 35 | 1  | 5.912490  | -2.392634 | 1.679524  | 35 | 1  | 4.997891  | -2.551797 | -1.133334 |
| 36 | 6  | 5.347190  | 1.431099  | -0.953530 | 36 | 6  | 4.718891  | 1.027638  | 1.691716  |
| 37 | 1  | 5.383915  | 2.513163  | -1.053594 | 37 | 1  | 5.375179  | 0.901450  | 2.549722  |
| 38 | 1  | 6.172643  | 1.081383  | -0.331431 | 38 | 1  | 5.294151  | 1.289762  | 0.803827  |
| 39 | 1  | 5.376657  | 0.957781  | -1.936393 | 39 | 1  | 3.968764  | 1.792141  | 1.901320  |
| 40 | 8  | 1.149675  | -1.907317 | -1.396150 | 40 | 8  | 0.876879  | -1.589070 | -0.663527 |
| 41 | 1  | 2.126053  | -1.714162 | -1.618407 | 41 | 1  | 1.301905  | -2.447254 | -0.463465 |
| 42 | 8  | -2.753253 | 1.091999  | -3.692371 | 42 | 8  | -4.609306 | -1.354688 | -0.341871 |
| 43 | 6  | -4.064175 | 1.175153  | -3.143066 | 43 | 6  | -5.352329 | -0.498512 | -1.201489 |
| 44 | 1  | -4.027490 | 1.623213  | -2.143484 | 44 | 1  | -5.258379 | -0.817118 | -2.244242 |
| 45 | 1  | -4.631566 | 1.813327  | -3.816905 | 45 | 1  | -6.389375 | -0.585925 | -0.884047 |
| 46 | 1  | -4.524894 | 0.183343  | -3.094649 | 46 | 1  | -5.018607 | 0.539254  | -1.096049 |

|                                                           |                                                           |
|-----------------------------------------------------------|-----------------------------------------------------------|
| E(RM062X) = -1416.00923982                                | E(RM062X) = -1416.00486883                                |
| Zero-point correction= 0.375113 (Hartree/Particle)        | Zero-point correction= 0.376148 (Hartree/Particle)        |
| Sum of electronic and thermal Energies= -1415.610034      | Sum of electronic and thermal Energies= -1415.604164      |
| Sum of electronic and thermal Enthalpies= -1415.609090    | Sum of electronic and thermal Enthalpies= -1415.603220    |
| Sum of electronic and thermal Free Energies= -1415.689633 | Sum of electronic and thermal Free Energies= -1415.685735 |

### Conformational flexibility of the transition states and Eyringkinetic analysis

To consider conformational influence to the reaction outcome, approaching direction of *p*-methoxyphenol was examined. Conformational varieties of *p*-methoxyphenol and dimethyl phosphonate moiety have been fixed. As shown in Table S4, six possibilities were considered for the transition states of the C-C bond forming step. Gibbs energies differences were calculated from the value of **INT-1a**. For the C-O bond forming reaction, two possibilities keeping the H-bonding was computed (Table S5).

**Table S4.** Considered transition states, molecular geometries and energies

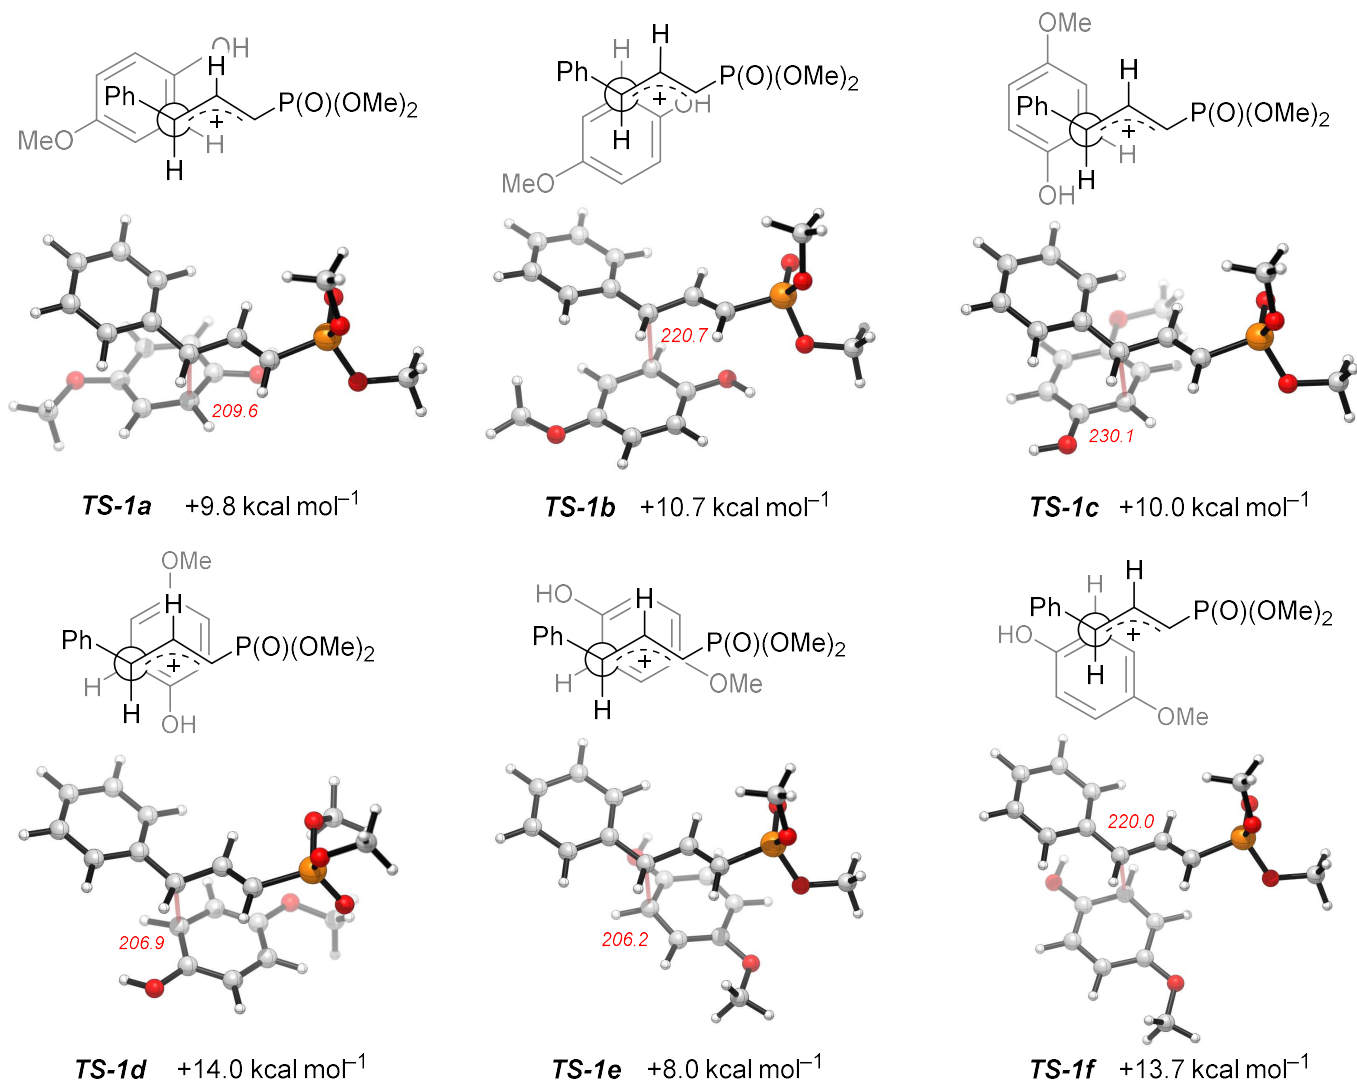

*TS-1b**TS-1c*

| Center | Atomic | Coordinates (Angstroms) |           |           | Center | Atomic | Coordinates (Angstroms) |           |           |
|--------|--------|-------------------------|-----------|-----------|--------|--------|-------------------------|-----------|-----------|
| Number | Number | X                       | Y         | Z         | Number | Number | X                       | Y         | Z         |
| 1      | 6      | 1.612698                | -0.065992 | 0.501442  | 1      | 6      | 1.385824                | -0.384617 | 0.302560  |
| 2      | 1      | 1.178792                | -0.692726 | 1.280679  | 2      | 1      | 0.953383                | -1.012001 | 1.079659  |
| 3      | 6      | 0.858445                | 0.806849  | -0.186456 | 3      | 6      | 0.651098                | 0.501097  | -0.387106 |
| 4      | 1      | 1.313637                | 1.414060  | -0.965152 | 4      | 1      | 1.129834                | 1.106331  | -1.153303 |
| 5      | 6      | -0.565395               | 0.902728  | 0.065545  | 5      | 6      | -0.765688               | 0.698481  | -0.107084 |
| 6      | 1      | -0.932654               | 0.333613  | 0.920154  | 6      | 1      | -1.186446               | 0.085628  | 0.690755  |
| 7      | 6      | -1.327907               | 2.099363  | -0.254190 | 7      | 6      | -1.445652               | 1.928407  | -0.387401 |
| 8      | 6      | -2.467097               | 2.383648  | 0.521409  | 8      | 6      | -2.602413               | 2.239397  | 0.366625  |
| 9      | 6      | -0.958261               | 2.978126  | -1.288632 | 9      | 6      | -1.010231               | 2.829697  | -1.383791 |
| 10     | 6      | -3.211926               | 3.530637  | 0.280614  | 10     | 6      | -3.277201               | 3.427082  | 0.153807  |
| 11     | 1      | -2.750467               | 1.705696  | 1.322340  | 11     | 1      | -2.939299               | 1.544504  | 1.131418  |
| 12     | 6      | -1.713863               | 4.116897  | -1.533681 | 12     | 6      | -1.703147               | 4.015668  | -1.601268 |
| 13     | 1      | -0.092746               | 2.768580  | -1.909294 | 13     | 1      | -0.134465               | 2.607849  | -1.984248 |
| 14     | 6      | -2.837755               | 4.395080  | -0.750319 | 14     | 6      | -2.827812               | 4.314970  | -0.833907 |
| 15     | 1      | -4.080851               | 3.752069  | 0.890781  | 15     | 1      | -4.150294               | 3.671998  | 0.748275  |
| 16     | 1      | -1.429139               | 4.790816  | -2.334097 | 16     | 1      | -1.364816               | 4.704747  | -2.366857 |
| 17     | 1      | -3.421858               | 5.288711  | -0.944372 | 17     | 1      | -3.360734               | 5.245253  | -1.001729 |
| 18     | 6      | -0.647752               | -1.650162 | -0.901342 | 18     | 6      | -2.851751               | -0.581763 | -1.311590 |

|    |    |           |           |           |    |    |           |           |           |
|----|----|-----------|-----------|-----------|----|----|-----------|-----------|-----------|
| 19 | 6  | -1.217391 | -2.481034 | 0.085651  | 19 | 6  | -3.584231 | 0.337671  | -2.073335 |
| 20 | 6  | -1.377959 | -0.539655 | -1.394039 | 20 | 6  | -1.507671 | -0.846243 | -1.642178 |
| 21 | 6  | -2.529997 | -2.286766 | 0.441544  | 21 | 6  | -2.980824 | 0.946097  | -3.154029 |
| 22 | 1  | -0.636560 | -3.285773 | 0.525086  | 22 | 1  | -4.604700 | 0.588984  | -1.801598 |
| 23 | 6  | -2.766219 | -0.427052 | -1.090852 | 23 | 6  | -0.939141 | -0.304210 | -2.824005 |
| 24 | 1  | -0.973167 | -0.012609 | -2.252757 | 24 | 1  | -1.000052 | -1.648734 | -1.117183 |
| 25 | 6  | -3.328125 | -1.269951 | -0.161384 | 25 | 6  | -1.655958 | 0.619930  | -3.553719 |
| 26 | 1  | -2.997941 | -2.921304 | 1.187620  | 26 | 1  | -3.518536 | 1.686649  | -3.738351 |
| 27 | 1  | -3.330223 | 0.371667  | -1.556849 | 27 | 1  | 0.071617  | -0.589485 | -3.090947 |
| 28 | 15 | 3.339673  | -0.333666 | 0.087052  | 28 | 15 | 3.145246  | -0.527399 | -0.045148 |
| 29 | 8  | 3.286651  | -1.909429 | -0.190435 | 29 | 8  | 3.315250  | -2.107226 | -0.101302 |
| 30 | 8  | 4.173707  | -0.279487 | 1.450334  | 30 | 8  | 3.911251  | -0.162664 | 1.313344  |
| 31 | 8  | 3.846107  | 0.545023  | -0.992867 | 31 | 8  | 3.574074  | 0.265426  | -1.223687 |
| 32 | 6  | 4.520431  | -2.605019 | -0.481283 | 32 | 6  | 4.628938  | -2.664798 | -0.320399 |
| 33 | 1  | 4.243445  | -3.634241 | -0.698089 | 33 | 1  | 4.493937  | -3.742973 | -0.367561 |
| 34 | 1  | 5.004691  | -2.155706 | -1.350070 | 34 | 1  | 5.038972  | -2.295707 | -1.262259 |
| 35 | 1  | 5.177520  | -2.566152 | 0.389058  | 35 | 1  | 5.284510  | -2.403405 | 0.512262  |
| 36 | 6  | 4.787875  | 0.959230  | 1.859178  | 36 | 6  | 4.285528  | 1.205882  | 1.559905  |
| 37 | 1  | 4.020359  | 1.685903  | 2.136343  | 37 | 1  | 3.392973  | 1.828990  | 1.662697  |
| 38 | 1  | 5.399896  | 0.719002  | 2.726000  | 38 | 1  | 4.842093  | 1.202984  | 2.494768  |
| 39 | 1  | 5.407211  | 1.353430  | 1.052790  | 39 | 1  | 4.909910  | 1.575653  | 0.745668  |
| 40 | 8  | 0.586643  | -1.805332 | -1.361812 | 40 | 8  | -3.338084 | -1.174767 | -0.209066 |

|                                                           |   |           |           |           |                                                           |   |           |           |           |
|-----------------------------------------------------------|---|-----------|-----------|-----------|-----------------------------------------------------------|---|-----------|-----------|-----------|
| 41                                                        | 1 | 1.098219  | -2.493176 | -0.902714 | 41                                                        | 1 | -4.258164 | -0.921025 | -0.047022 |
| 42                                                        | 8 | -4.609335 | -1.234216 | 0.257930  | 42                                                        | 8 | -1.212969 | 1.269845  | -4.650675 |
| 43                                                        | 6 | -5.454530 | -0.244606 | -0.316910 | 43                                                        | 6 | 0.111988  | 0.987418  | -5.085423 |
| 44                                                        | 1 | -5.535769 | -0.389368 | -1.399057 | 44                                                        | 1 | 0.215430  | -0.069648 | -5.349860 |
| 45                                                        | 1 | -6.429034 | -0.376172 | 0.148093  | 45                                                        | 1 | 0.276171  | 1.605180  | -5.965654 |
| 46                                                        | 1 | -5.073604 | 0.760785  | -0.104291 | 46                                                        | 1 | 0.840298  | 1.248616  | -4.309184 |
| E(RM062X) = -1416.00646923                                |   |           |           |           | E(RM062X) = -1416.00888716                                |   |           |           |           |
| Zero-point correction= 0.375189 (Hartree/Particle)        |   |           |           |           | Zero-point correction= 0.375705 (Hartree/Particle)        |   |           |           |           |
| Sum of electronic and thermal Energies=-1415.606526       |   |           |           |           | Sum of electronic and thermal Energies= -1415.608573      |   |           |           |           |
| Sum of electronic and thermal Enthalpies=-1415.605581     |   |           |           |           | Sum of electronic and thermal Enthalpies= -1415.607628    |   |           |           |           |
| Sum of electronic and thermal Free Energies= -1415.688686 |   |           |           |           | Sum of electronic and thermal Free Energies= -1415.689816 |   |           |           |           |

| <i>TS-1d</i> |        |                         |           |           | <i>TS-1e</i> |        |                         |           |           |
|--------------|--------|-------------------------|-----------|-----------|--------------|--------|-------------------------|-----------|-----------|
| Center       | Atomic | Coordinates (Angstroms) |           |           | Center       | Atomic | Coordinates (Angstroms) |           |           |
| Number       | Number | X                       | Y         | Z         | Number       | Number | X                       | Y         | Z         |
| 1            | 6      | 1.866712                | -0.739488 | 0.440709  | 1            | 6      | 1.605284                | -0.105940 | 0.423376  |
| 2            | 1      | 1.437269                | -1.568159 | 1.000802  | 2            | 1      | 1.166391                | -0.782083 | 1.154861  |
| 3            | 6      | 1.100535                | 0.238875  | -0.065102 | 3            | 6      | 0.877792                | 0.828400  | -0.208165 |
| 4            | 1      | 1.565029                | 1.056960  | -0.609276 | 4            | 1      | 1.375007                | 1.474109  | -0.927966 |
| 5            | 6      | -0.351712               | 0.236944  | 0.069248  | 5            | 6      | -0.562148               | 0.948032  | -0.014535 |
| 6            | 1      | -0.737449               | -0.461997 | 0.810949  | 6            | 1      | -0.940773               | 0.409612  | 0.852086  |
| 7            | 6      | -1.106778               | 1.495394  | -0.005282 | 7            | 6      | -1.276061               | 2.193959  | -0.296746 |

|    |    |           |           |           |    |    |           |           |           |
|----|----|-----------|-----------|-----------|----|----|-----------|-----------|-----------|
| 8  | 6  | -2.265848 | 1.623214  | 0.776694  | 8  | 6  | -2.531173 | 2.393972  | 0.306365  |
| 9  | 6  | -0.700792 | 2.565662  | -0.819441 | 9  | 6  | -0.752478 | 3.195573  | -1.132304 |
| 10 | 6  | -2.997092 | 2.806258  | 0.759594  | 10 | 6  | -3.241384 | 3.565501  | 0.086751  |
| 11 | 1  | -2.580375 | 0.797327  | 1.409567  | 11 | 1  | -2.941063 | 1.625358  | 0.957120  |
| 12 | 6  | -1.438042 | 3.742293  | -0.838921 | 12 | 6  | -1.464458 | 4.370763  | -1.346420 |
| 13 | 1  | 0.183045  | 2.481989  | -1.444654 | 13 | 1  | 0.213703  | 3.071257  | -1.610097 |
| 14 | 6  | -2.584955 | 3.865082  | -0.049410 | 14 | 6  | -2.707695 | 4.556221  | -0.742120 |
| 15 | 1  | -3.884149 | 2.902807  | 1.376035  | 15 | 1  | -4.205200 | 3.712467  | 0.561764  |
| 16 | 1  | -1.121042 | 4.566261  | -1.468908 | 16 | 1  | -1.049138 | 5.142294  | -1.985618 |
| 17 | 1  | -3.156010 | 4.787466  | -0.066761 | 17 | 1  | -3.260767 | 5.473997  | -0.913093 |
| 18 | 6  | -1.018291 | -2.030511 | -0.998694 | 18 | 6  | -0.833918 | 0.039746  | -2.456817 |
| 19 | 6  | -1.032392 | -0.743508 | -1.620303 | 19 | 6  | 0.363692  | -0.508935 | -2.957884 |
| 20 | 6  | 0.094018  | -2.858707 | -1.160821 | 20 | 6  | -1.399716 | -0.474118 | -1.250380 |
| 21 | 6  | -0.056028 | -0.450562 | -2.624320 | 21 | 6  | 0.876334  | -1.629548 | -2.355087 |
| 22 | 1  | -1.980097 | -0.215068 | -1.667333 | 22 | 1  | 0.857188  | -0.066432 | -3.816855 |
| 23 | 6  | 1.107346  | -2.476903 | -2.020705 | 23 | 6  | -0.929659 | -1.724949 | -0.740316 |
| 24 | 1  | 0.145447  | -3.796795 | -0.619972 | 24 | 1  | -2.419071 | -0.174419 | -1.028104 |
| 25 | 6  | 1.026316  | -1.278807 | -2.791676 | 25 | 6  | 0.214917  | -2.276593 | -1.260602 |
| 26 | 1  | -0.135954 | 0.463269  | -3.203989 | 26 | 1  | 1.796707  | -2.077839 | -2.717502 |
| 27 | 1  | 1.977477  | -3.117516 | -2.111239 | 27 | 1  | -1.461937 | -2.175085 | 0.088846  |
| 28 | 15 | 3.635401  | -0.804971 | 0.123663  | 28 | 15 | 3.359817  | -0.250946 | 0.071532  |
| 29 | 8  | 4.221126  | -0.769130 | 1.600880  | 29 | 8  | 3.482787  | -1.813311 | -0.205941 |

|                                                           |   |           |           |           |                                                           |   |           |           |           |
|-----------------------------------------------------------|---|-----------|-----------|-----------|-----------------------------------------------------------|---|-----------|-----------|-----------|
| 30                                                        | 8 | 4.024219  | 0.627081  | -0.476510 | 30                                                        | 8 | 4.129849  | -0.109715 | 1.470435  |
| 31                                                        | 8 | 4.043003  | -1.945881 | -0.737953 | 31                                                        | 8 | 3.829774  | 0.679042  | -0.986132 |
| 32                                                        | 6 | 5.650751  | -0.847553 | 1.785639  | 32                                                        | 6 | 4.781803  | -2.384574 | -0.461765 |
| 33                                                        | 1 | 5.816587  | -0.831122 | 2.860355  | 33                                                        | 1 | 4.609009  | -3.434031 | -0.690995 |
| 34                                                        | 1 | 6.031438  | -1.777071 | 1.358989  | 34                                                        | 1 | 5.249744  | -1.886709 | -1.313409 |
| 35                                                        | 1 | 6.132418  | 0.014538  | 1.319292  | 35                                                        | 1 | 5.408801  | -2.291286 | 0.426926  |
| 36                                                        | 6 | 4.352167  | 0.767180  | -1.874336 | 36                                                        | 6 | 4.493203  | 1.203906  | 1.933578  |
| 37                                                        | 1 | 4.705327  | 1.789319  | -1.996133 | 37                                                        | 1 | 3.595593  | 1.796534  | 2.131178  |
| 38                                                        | 1 | 5.136186  | 0.060097  | -2.149183 | 38                                                        | 1 | 5.047686  | 1.056944  | 2.858218  |
| 39                                                        | 1 | 3.465775  | 0.597861  | -2.492128 | 39                                                        | 1 | 5.117102  | 1.703603  | 1.191279  |
| 40                                                        | 8 | -1.987299 | -2.434669 | -0.177677 | 40                                                        | 8 | -1.463360 | 1.057780  | -3.016991 |
| 41                                                        | 1 | -2.784178 | -1.887122 | -0.245408 | 41                                                        | 1 | -0.989980 | 1.410242  | -3.787326 |
| 42                                                        | 8 | 1.973844  | -0.908165 | -3.679270 | 42                                                        | 8 | 0.793067  | -3.421797 | -0.863839 |
| 43                                                        | 6 | 3.033273  | -1.824651 | -3.970878 | 43                                                        | 6 | 0.210101  | -4.101449 | 0.241567  |
| 44                                                        | 1 | 2.630766  | -2.759172 | -4.373821 | 44                                                        | 1 | -0.815737 | -4.405283 | 0.010552  |
| 45                                                        | 1 | 3.638615  | -1.332356 | -4.729833 | 45                                                        | 1 | 0.826816  | -4.981227 | 0.410834  |
| 46                                                        | 1 | 3.634970  | -2.016461 | -3.076950 | 46                                                        | 1 | 0.220442  | -3.464785 | 1.132848  |
| E(RM062X) = -1416.00696121                                |   |           |           |           | E(RM062X) = -1416.01387813                                |   |           |           |           |
| Zero-point correction= 0.377021 (Hartree/Particle)        |   |           |           |           | Zero-point correction= 0.376340 (Hartree/Particle)        |   |           |           |           |
| Sum of electronic and thermal Energies= -1415.605952      |   |           |           |           | Sum of electronic and thermal Energies= -1415.613233      |   |           |           |           |
| Sum of electronic and thermal Enthalpies= -1415.605008    |   |           |           |           | Sum of electronic and thermal Enthalpies= -1415.612289    |   |           |           |           |
| Sum of electronic and thermal Free Energies= -1415.683443 |   |           |           |           | Sum of electronic and thermal Free Energies= -1415.692955 |   |           |           |           |

*TS-1f*

| Center | Atomic | Coordinates (Angstroms) |           |           |
|--------|--------|-------------------------|-----------|-----------|
| Number | Number | X                       | Y         | Z         |
| 1      | 6      | 1.593336                | -0.201846 | 0.424868  |
| 2      | 1      | 1.203979                | -0.794791 | 1.250828  |
| 3      | 6      | 0.807534                | 0.602037  | -0.304439 |
| 4      | 1      | 1.241599                | 1.172934  | -1.121719 |
| 5      | 6      | -0.609864               | 0.773757  | 0.018175  |
| 6      | 1      | -0.963781               | 0.197217  | 0.872986  |
| 7      | 6      | -1.271634               | 2.037941  | -0.212328 |
| 8      | 6      | -2.350655               | 2.391635  | 0.623353  |
| 9      | 6      | -0.867287               | 2.927892  | -1.231261 |
| 10     | 6      | -2.975335               | 3.622942  | 0.482163  |
| 11     | 1      | -2.680388               | 1.696078  | 1.390851  |
| 12     | 6      | -1.516336               | 4.142959  | -1.387033 |
| 13     | 1      | -0.056062               | 2.667905  | -1.903233 |
| 14     | 6      | -2.561306               | 4.495680  | -0.525098 |
| 15     | 1      | -3.790597               | 3.896948  | 1.142135  |
| 16     | 1      | -1.207456               | 4.823224  | -2.172837 |
| 17     | 1      | -3.057044               | 5.453234  | -0.646434 |
| 18     | 6      | -0.826115               | -1.857305 | -1.035241 |
| 19     | 6      | -1.426358               | -2.664351 | -0.094343 |

|    |    |           |           |           |
|----|----|-----------|-----------|-----------|
| 20 | 6  | -1.441431 | -0.645138 | -1.442856 |
| 21 | 6  | -2.705076 | -2.303280 | 0.417299  |
| 22 | 6  | -2.772471 | -0.377992 | -1.027447 |
| 23 | 1  | -1.039508 | -0.114541 | -2.303008 |
| 24 | 6  | -3.366952 | -1.184862 | -0.043353 |
| 25 | 1  | -3.185533 | -2.916536 | 1.170649  |
| 26 | 15 | 3.350808  | -0.295967 | 0.057249  |
| 27 | 8  | 3.581009  | -1.869440 | 0.072496  |
| 28 | 8  | 4.115749  | 0.159983  | 1.389623  |
| 29 | 8  | 3.740367  | 0.456214  | -1.160663 |
| 30 | 6  | 4.913989  | -2.384593 | -0.131962 |
| 31 | 1  | 4.818691  | -3.467919 | -0.148642 |
| 32 | 1  | 5.311033  | -2.027726 | -1.084118 |
| 33 | 1  | 5.559202  | -2.075522 | 0.692457  |
| 34 | 6  | 4.433625  | 1.553129  | 1.566165  |
| 35 | 1  | 3.517411  | 2.148514  | 1.608785  |
| 36 | 1  | 4.963662  | 1.624638  | 2.513718  |
| 37 | 1  | 5.066596  | 1.898902  | 0.748086  |
| 38 | 8  | -3.476914 | 0.658244  | -1.476188 |
| 39 | 1  | -3.024647 | 1.134604  | -2.188773 |
| 40 | 8  | -0.753605 | -3.769688 | 0.292947  |
| 41 | 1  | -4.357098 | -0.930594 | 0.317658  |

|    |   |           |           |           |
|----|---|-----------|-----------|-----------|
| 42 | 1 | 0.153346  | -2.122650 | -1.417778 |
| 43 | 6 | -1.389331 | -4.675614 | 1.188934  |
| 44 | 1 | -2.327585 | -5.048742 | 0.766583  |
| 45 | 1 | -0.692396 | -5.501500 | 1.314588  |
| 46 | 1 | -1.573405 | -4.203576 | 2.159011  |

---

E(RM062X) = -1416.00171605

Zero-point correction= 0.375626 (Hartree/Particle)

Sum of electronic and thermal Energies= -1415.601350

Sum of electronic and thermal Enthalpies= -1415.600406

Sum of electronic and thermal Free Energies= -1415.683872

---

**Table S5.** Considered transition states, molecular geometries and energies

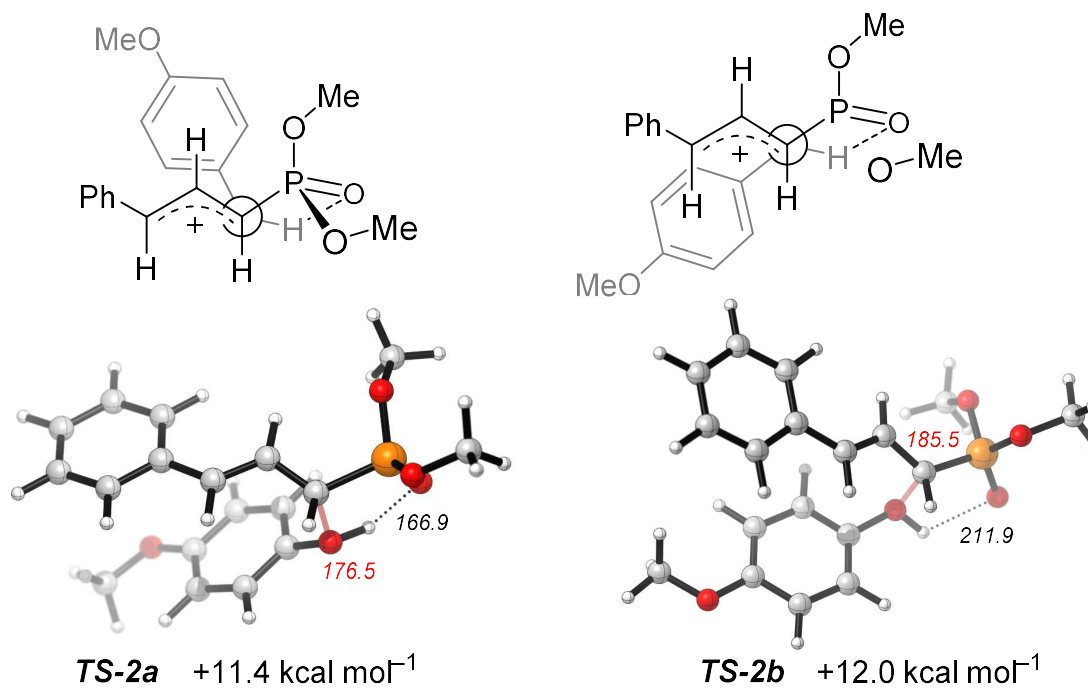

**TS-2b**

| Center | Atomic | Coordinates (Angstroms) |           |          |
|--------|--------|-------------------------|-----------|----------|
| Number | Number | X                       | Y         | Z        |
| 1      | 6      | 2.252806                | -0.962805 | 0.934992 |
| 2      | 1      | 2.212846                | -1.697762 | 1.739395 |
| 3      | 6      | 1.266789                | 0.056521  | 0.933684 |
| 4      | 1      | 1.395935                | 0.910171  | 0.275124 |

|    |   |           |           |           |
|----|---|-----------|-----------|-----------|
| 5  | 6 | 0.117124  | -0.157273 | 1.640998  |
| 6  | 1 | 0.069163  | -1.056697 | 2.257085  |
| 7  | 6 | -1.080648 | 0.657235  | 1.643375  |
| 8  | 6 | -2.219065 | 0.149389  | 2.293957  |
| 9  | 6 | -1.155669 | 1.902200  | 0.990786  |
| 10 | 6 | -3.412157 | 0.863744  | 2.285434  |
| 11 | 1 | -2.160898 | -0.812006 | 2.797740  |
| 12 | 6 | -2.344727 | 2.616374  | 0.993839  |
| 13 | 1 | -0.284270 | 2.314522  | 0.492288  |
| 14 | 6 | -3.473999 | 2.096832  | 1.636677  |
| 15 | 1 | -4.288200 | 0.464522  | 2.785026  |
| 16 | 1 | -2.398630 | 3.578954  | 0.496958  |
| 17 | 1 | -4.401809 | 2.659706  | 1.632565  |
| 18 | 6 | 0.456654  | -2.645408 | -0.226724 |
| 19 | 6 | -0.588285 | -1.937590 | -0.800004 |
| 20 | 6 | 0.232299  | -3.735275 | 0.616121  |
| 21 | 6 | -1.903526 | -2.322722 | -0.542885 |
| 22 | 1 | -0.372223 | -1.085481 | -1.436428 |
| 23 | 6 | -1.072457 | -4.125861 | 0.861224  |
| 24 | 1 | 1.062482  | -4.268656 | 1.070499  |
| 25 | 6 | -2.146612 | -3.414126 | 0.297082  |
| 26 | 1 | -2.714381 | -1.761157 | -0.989090 |

|    |    |           |           |           |
|----|----|-----------|-----------|-----------|
| 27 | 1  | -1.289538 | -4.973868 | 1.501131  |
| 28 | 15 | 3.926044  | -0.713931 | 0.245370  |
| 29 | 8  | 4.658665  | -0.111915 | 1.505038  |
| 30 | 8  | 3.830548  | 0.512675  | -0.760769 |
| 31 | 8  | 4.415194  | -1.985503 | -0.347736 |
| 32 | 6  | 6.048480  | 0.291627  | 1.421346  |
| 33 | 1  | 6.151436  | 1.096964  | 0.692899  |
| 34 | 1  | 6.313247  | 0.643248  | 2.415160  |
| 35 | 1  | 6.664082  | -0.565373 | 1.145207  |
| 36 | 6  | 3.560889  | 0.287937  | -2.163943 |
| 37 | 1  | 3.801120  | 1.221603  | -2.667181 |
| 38 | 1  | 4.187027  | -0.521931 | -2.539100 |
| 39 | 1  | 2.504097  | 0.047029  | -2.299992 |
| 40 | 8  | 1.738024  | -2.127883 | -0.414213 |
| 41 | 1  | 2.459481  | -2.787600 | -0.501607 |
| 42 | 8  | -3.377374 | -3.856832 | 0.628403  |
| 43 | 6  | -4.500726 | -3.143621 | 0.125831  |
| 44 | 1  | -4.527833 | -3.180583 | -0.967647 |
| 45 | 1  | -5.377111 | -3.645294 | 0.530965  |
| 46 | 1  | -4.480552 | -2.102033 | 0.464009  |

---

E(RM062X) = -1416.00578811

Zero-point correction=0.376086 (Hartree/Particle)

---

---

Sum of electronic and thermal Energies= -1415.605272

Sum of electronic and thermal Enthalpies= -1415.604327

Sum of electronic and thermal Free Energies= -1415.686608

---

Based on all the transition states, the total kinetic constant  $k_{\text{total}}$  for each C-C and C-O bond forming step was calculated according to the Eyring equation (Eqns. 1 and 2).

$$k_{\text{total}} = k_a + k_b \cdots + k_n \quad \cdots \text{ (Eqn. 1)}$$

$$\Delta G_{\text{total}}^{\ddagger} = RT \cdot \ln \left( \frac{k_B \cdot T}{k_{\text{total}} \cdot h} \right) \quad \cdots \text{ (Eqn. 1)}$$

where  $k_B$  is Boltzmann constant ( $1.38065 \times 10^{-23} \text{ J K}^{-1}$ ),  $T$  is temperature (298.15 K),  $h$  is Planck's constant ( $6.62607 \times 10^{-34} \text{ J s}$ ), and  $R$  is gas constant ( $8.31447 \text{ J K}^{-1} \text{ mol}^{-1}$ ).

**Table S7.**  $\Delta G_{298}$  of transition states and their Boltzmann weights

| TS-1  | $\Delta G^{\ddagger}$     | $k (\times 10^4 \text{ s}^{-1})$ | TS-2  | $\Delta G^{\ddagger}$     | $k (\times 10^4 \text{ s}^{-1})$ |
|-------|---------------------------|----------------------------------|-------|---------------------------|----------------------------------|
|       | (kcal mol <sup>-1</sup> ) |                                  |       | (kcal mol <sup>-1</sup> ) |                                  |
| TS-1a | 10.7                      | 8.96                             | TS-2a | 11.4                      | 2.56                             |
| TS-1b | 9.8                       | 39.8                             | TS-2b | 12.0                      | 0.992                            |
| TS-1c | 10.0                      | 29.6                             |       |                           |                                  |
| TS-1d | 14.0                      | 0.0347                           |       |                           |                                  |
| TS-1e | 8.0                       | 824                              |       |                           |                                  |
| TS-1f | 13.7                      | 0.0547                           |       |                           |                                  |
| Total | 7.96                      | 902                              |       | 11.2                      | 3.56                             |

## Natural bond orbital (NBO) calculation

To study atomic charges of each atom in the allyl cation intermediate, NBO calculation was conducted by using *NBO7.0* package program. As shown in Figure S148, NPA (natural population analysis) charges of C3 and C1 atoms were  $+0.10 e$  and  $-0.43 e$ , respectively. Interatomic distances and NLMO (natural localization molecular orbital)/NPA bond orders, which is a covalent bond order in the NBO theory, clearly demonstrate a pronounced double bond character of the C1–C2 bond rather than the C2–C3 bond. From these theoretical results, we have concluded that the larger positive charge of C3 atom also contributes to the  $\gamma$ -selectivity observed in the experiments.

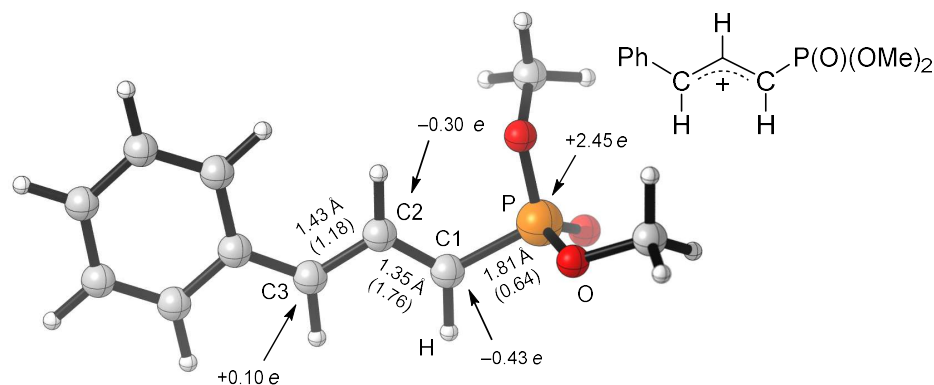

**Figure S148.** Considered transition states, molecular geometries and energies

## References

1. For *Gaussian 09*, Revision D.01, M. J. Frisch, G. W. Trucks, H. B. Schlegel, G. E. Scuseria, M. A. Robb, J. R. Cheeseman, G. Scalmani, V. Barone, B. Mennucci, G. A. Petersson, H. Nakatsuji, M. Caricato, X. Li, H. P. Hratchian, A. F. Izmaylov, J. Bloino, G. Zheng, J. L. Sonnenberg, M. Hada, M. Ehara, K. Toyota, R. Fukuda, J. Hasegawa, M. Ishida, T. Nakajima, Y. Honda, O. Kitao, H. Nakai, T. Vreven, J. A. Montgomery, Jr., J. E. Peralta, F. Ogliaro, M. Bearpark, J. J. Heyd, E. Brothers, K. N. Kudin, V. N. Staroverov, T. Keith, R. Kobayashi, J. Normand, K. Raghavachari, A. Rendell, J. C. Burant, S. S. Iyengar, J. Tomasi, M. Cossi, N. Rega, J. M. Millam, M. Klene, J. E. Knox, J. B. Cross, V. Bakken, C. Adamo, J. Jaramillo, R. Gomperts, R. E. Stratmann, O. Yazyev, A. J. Austin, R. Cammi, C. Pomelli, J. W. Ochterski, R. L. Martin, K. Morokuma, V. G. Zakrzewski, G. A. Voth, P. Salvador, J. J. Dannenberg, S. Dapprich, A. D. Daniels, O. Farkas, J. B. Foresman, J. V. Ortiz, J. Cioslowski, D. J. Fox, Gaussian, Inc., Wallingford CT, 2013.
